# Supplementary material for: Synthesis and Butyllithium-Induced Cyclisation of 2-Benzyloxyphenylphosphonamidates Giving 2,3-Dihydrobenzo[d][1,3]oxaphospholes
Source: MDPI journal article supplement (doi:10.3390/org5010002), 2024-02-01

# Synthesis and Base-induced Cyclisation of 2-Benzyloxyphenylphosphonamidates giving 2,3-Dihydrobenzo[*d*][1,3]oxaphospholes

R. Alan Aitken \* Khadija Ait Moulay, David B. Cordes, Ryan A. Inwood, Fraser G. Jamieson, Alexander J. B. Nelson and Aidan P. McKay  
EaStCHEM School of Chemistry, University of St Andrews, North Haugh, St Andrews, Fife, KY16 9ST, UK.

## Supplementary Material

## Figure

|                                                                                                                                  |                    |
|----------------------------------------------------------------------------------------------------------------------------------|--------------------|
| <sup>1</sup> H NMR and DEPTQ <sup>13</sup> C NMR spectra of <b>13</b>                                                            | S1, S2             |
| <sup>1</sup> H NMR, <sup>31</sup> P NMR and DEPTQ <sup>13</sup> C NMR spectra of <b>14</b>                                       | S3, S4, S5         |
| <sup>1</sup> H NMR, <sup>31</sup> P NMR and DEPTQ <sup>13</sup> C NMR spectra of <b>15</b>                                       | S6, S7, S8         |
| <sup>1</sup> H NMR, <sup>31</sup> P NMR and DEPTQ <sup>13</sup> C NMR spectra of <b>16</b>                                       | S9, S10, S11       |
| <sup>1</sup> H NMR, <sup>1</sup> H{ <sup>31</sup> P} NMR, <sup>31</sup> P NMR and DEPTQ <sup>13</sup> C NMR spectra of <b>17</b> | S12, S13, S14, S15 |
| <sup>1</sup> H NMR and DEPTQ <sup>13</sup> C NMR spectra of <b>18a</b>                                                           | S16, S17           |
| <sup>1</sup> H NMR and DEPTQ <sup>13</sup> C NMR spectra of <b>18b</b>                                                           | S18, S19           |
| <sup>1</sup> H NMR and DEPTQ <sup>13</sup> C NMR spectra of <b>18c</b>                                                           | S20, S21           |
| <sup>1</sup> H NMR and DEPTQ <sup>13</sup> C NMR spectra of <b>18d</b>                                                           | S22, S23           |
| <sup>1</sup> H NMR and DEPTQ <sup>13</sup> C NMR spectra of <b>18e</b>                                                           | S24, S25           |
| <sup>1</sup> H NMR, and DEPTQ <sup>13</sup> C NMR spectra of <b>18f</b>                                                          | S26, S27           |
| <sup>1</sup> H NMR, <sup>19</sup> F NMR and DEPTQ <sup>13</sup> C NMR spectra of <b>18g</b>                                      | S28, S29, S30      |
| <sup>1</sup> H NMR, <sup>19</sup> F NMR and DEPTQ <sup>13</sup> C NMR spectra of <b>18h</b>                                      | S31, S32, S33      |
| <sup>1</sup> H NMR and DEPTQ <sup>13</sup> C NMR spectra of <b>18l</b>                                                           | S34, S35           |
| <sup>1</sup> H NMR, <sup>31</sup> P NMR and DEPTQ <sup>13</sup> C NMR spectra of <b>19b</b>                                      | S36, S37, S38      |

|                                                                                                                  |                    |
|------------------------------------------------------------------------------------------------------------------|--------------------|
| <sup>1</sup> H NMR and <sup>31</sup> P NMR spectra of <b>19d</b>                                                 | S39, S40           |
| <sup>1</sup> H NMR, <sup>31</sup> P NMR and DEPTQ <sup>13</sup> C NMR spectra of <b>19e</b>                      | S41, S42, S43      |
| <sup>31</sup> P NMR spectrum of <b>20</b>                                                                        | S44                |
| <sup>1</sup> H NMR, <sup>31</sup> P NMR and DEPTQ <sup>13</sup> C NMR spectra of <b>22</b>                       | S45, S46, S47      |
| <sup>1</sup> H NMR, <sup>31</sup> P NMR and DEPTQ <sup>13</sup> C NMR spectra of <b>21a</b>                      | S48, S49, S50      |
| <sup>1</sup> H NMR, <sup>31</sup> P NMR and DEPTQ <sup>13</sup> C NMR spectra of <b>21b</b>                      | S51, S52, S53      |
| <sup>1</sup> H NMR, <sup>31</sup> P NMR and DEPTQ <sup>13</sup> C NMR spectra of <b>21c</b>                      | S54, S55, S56      |
| <sup>1</sup> H NMR, <sup>31</sup> P NMR and DEPTQ <sup>13</sup> C NMR spectra of <b>21d</b>                      | S57, S58, S59      |
| <sup>1</sup> H NMR and <sup>31</sup> P NMR spectra of <b>21e</b>                                                 | S60, S61           |
| <sup>1</sup> H NMR, <sup>31</sup> P NMR and DEPTQ <sup>13</sup> C NMR spectra of <b>21f</b>                      | S62, S63, S64      |
| <sup>1</sup> H NMR, <sup>19</sup> F NMR, <sup>31</sup> P NMR and DEPTQ <sup>13</sup> C NMR spectra of <b>21g</b> | S65, S66, S67, S68 |
| <sup>1</sup> H NMR, <sup>19</sup> F NMR, <sup>31</sup> P NMR and DEPTQ <sup>13</sup> C NMR spectra of <b>21h</b> | S69, S70, S71, S72 |
| <sup>1</sup> H NMR, <sup>31</sup> P NMR and DEPTQ <sup>13</sup> C NMR spectra of <b>21i</b>                      | S73, S74, S75      |
| <sup>1</sup> H NMR, <sup>31</sup> P NMR and DEPTQ <sup>13</sup> C NMR spectra of <b>21j</b>                      | S76, S77, S78      |
| <sup>1</sup> H NMR, <sup>31</sup> P NMR and DEPTQ <sup>13</sup> C NMR spectra of <b>21k</b>                      | S79, S80, S81      |
| <sup>1</sup> H NMR, <sup>31</sup> P NMR and DEPTQ <sup>13</sup> C NMR spectra of <b>21l</b>                      | S82, S83, S84      |
| <sup>1</sup> H NMR, <sup>31</sup> P NMR and DEPTQ <sup>13</sup> C NMR spectra of <b>21m</b>                      | S85, S86, S87      |
| <sup>1</sup> H NMR, <sup>31</sup> P NMR and DEPTQ <sup>13</sup> C NMR spectra of <b>23c</b>                      | S88, S89, S90      |
| <sup>1</sup> H NMR and <sup>31</sup> P NMR spectra of <b>23d</b>                                                 | S91, S92           |
| <sup>1</sup> H NMR and <sup>31</sup> P NMR spectra of <b>23e</b>                                                 | S93, S94           |
| <sup>1</sup> H NMR and <sup>31</sup> P NMR spectra of <b>23g</b>                                                 | S95, S96           |

$^1\text{H}$  NMR,  $^{31}\text{P}$  NMR and DEPTQ  $^{13}\text{C}$  NMR spectra of **23h**

S97, S98, S99

$^{31}\text{P}$  NMR spectrum of **23k**

S100

$^1\text{H}$  NMR,  $^{31}\text{P}$  NMR and DEPTQ  $^{13}\text{C}$  NMR spectra of **23l**

S101, S102, S103

Figure S1. 300 MHz  $^1\text{H}$  NMR spectrum of **13**

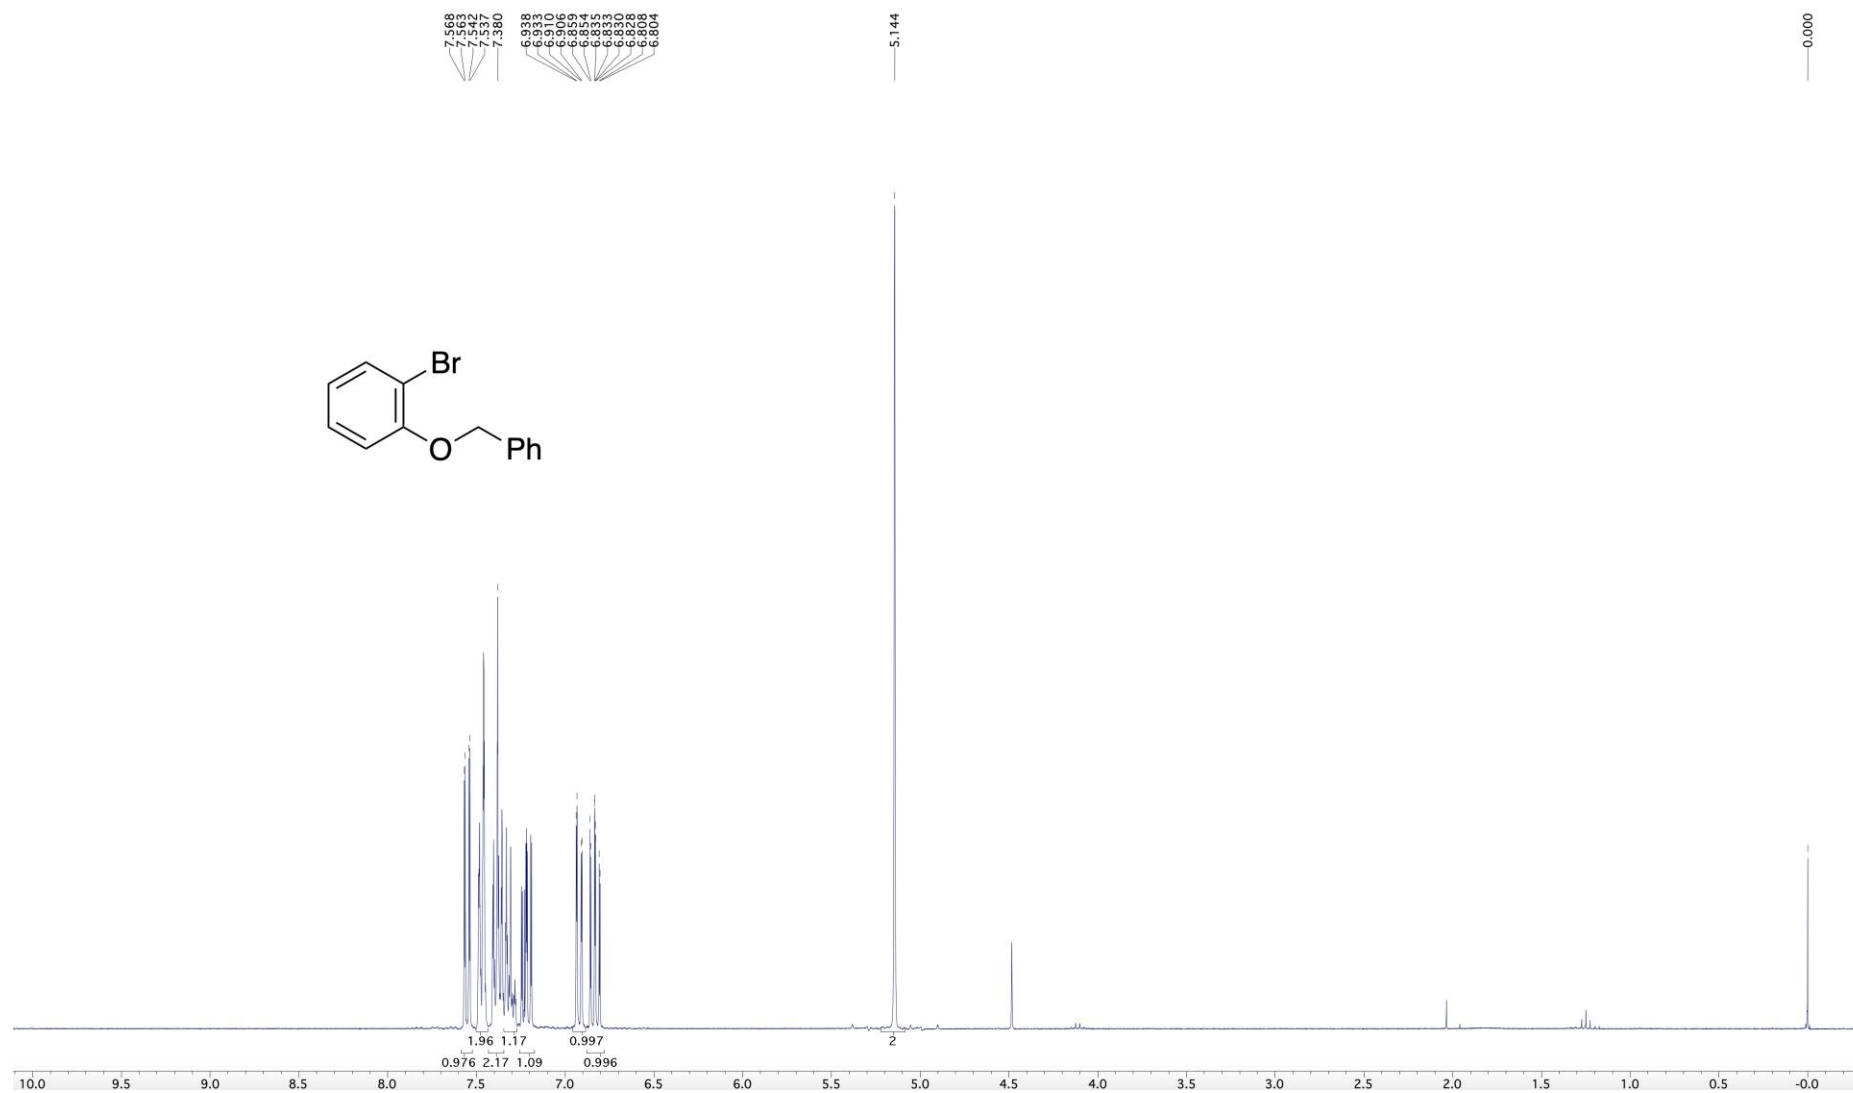



Figure S2. 100 MHz DEPTQ  $^{13}\text{C}$  NMR spectrum of **13**

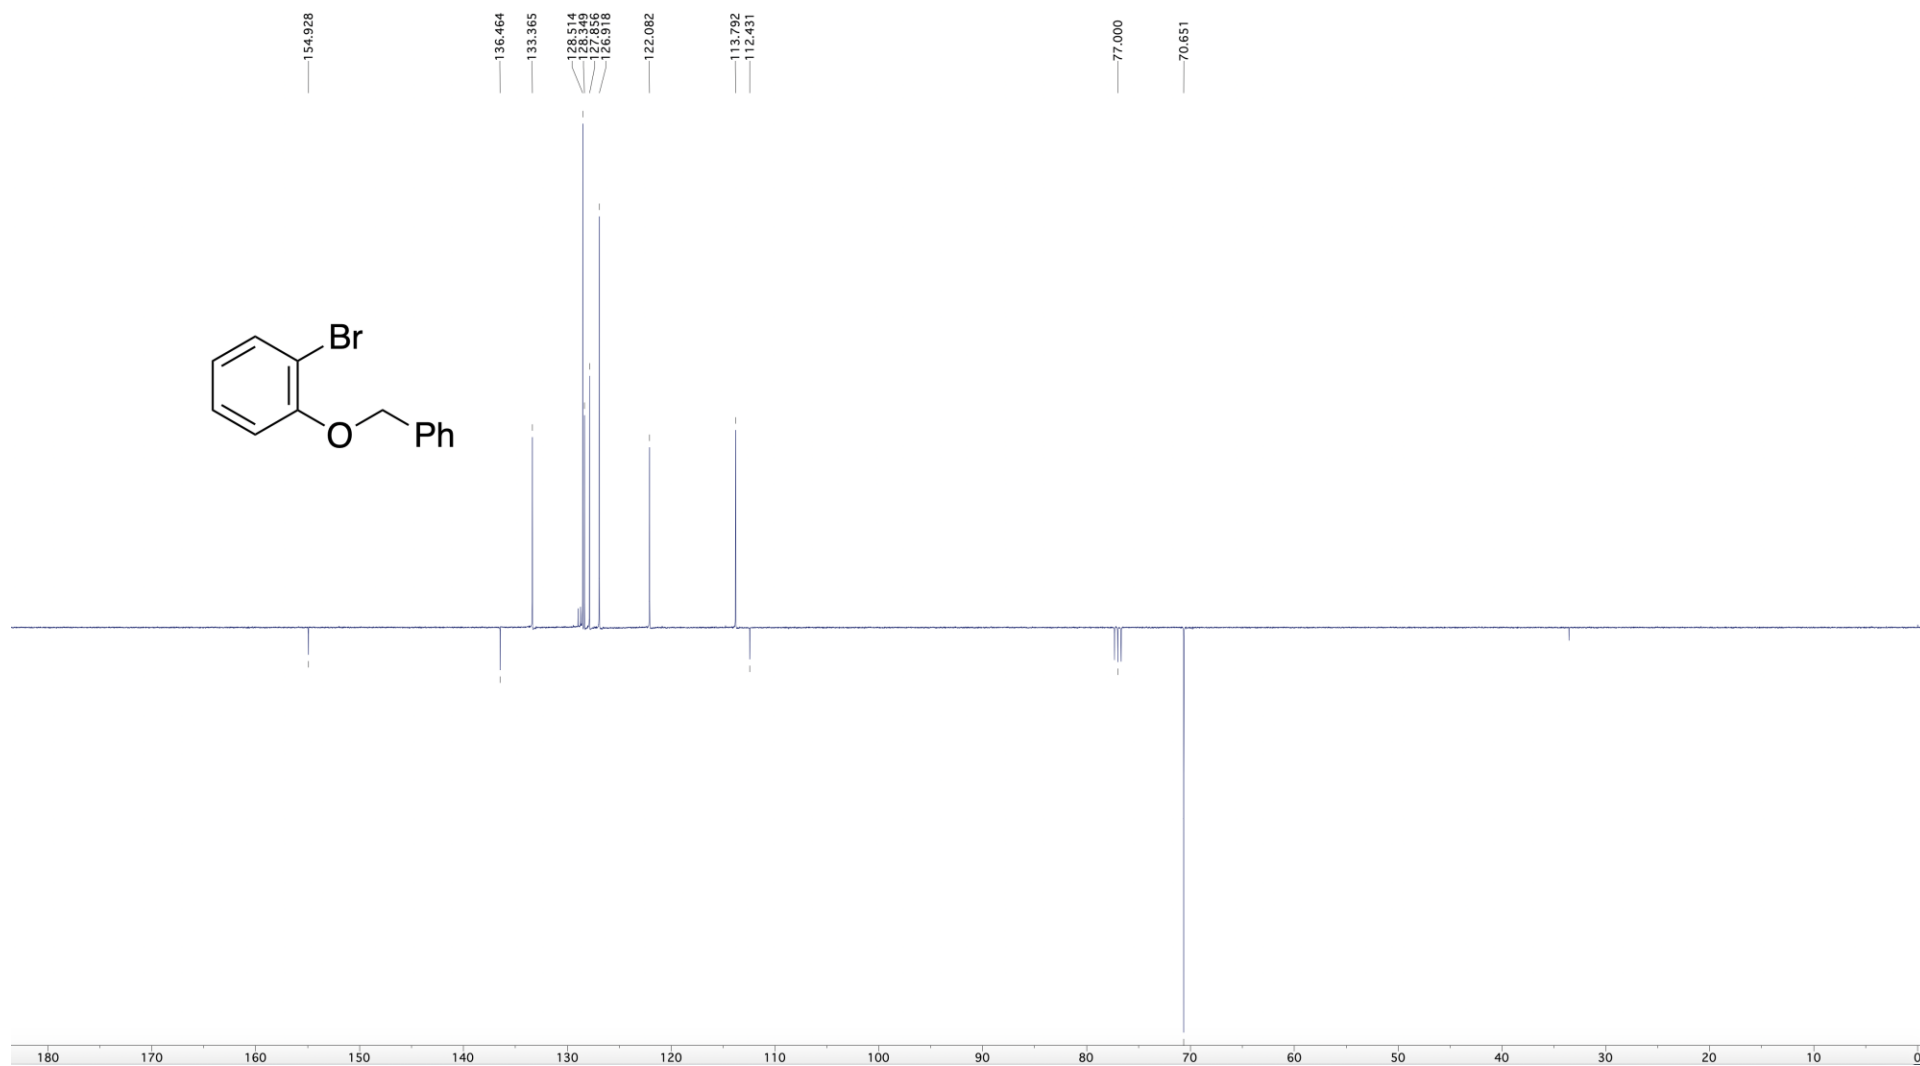

Figure S3. 400 MHz  $^1\text{H}$  NMR spectrum of **14**

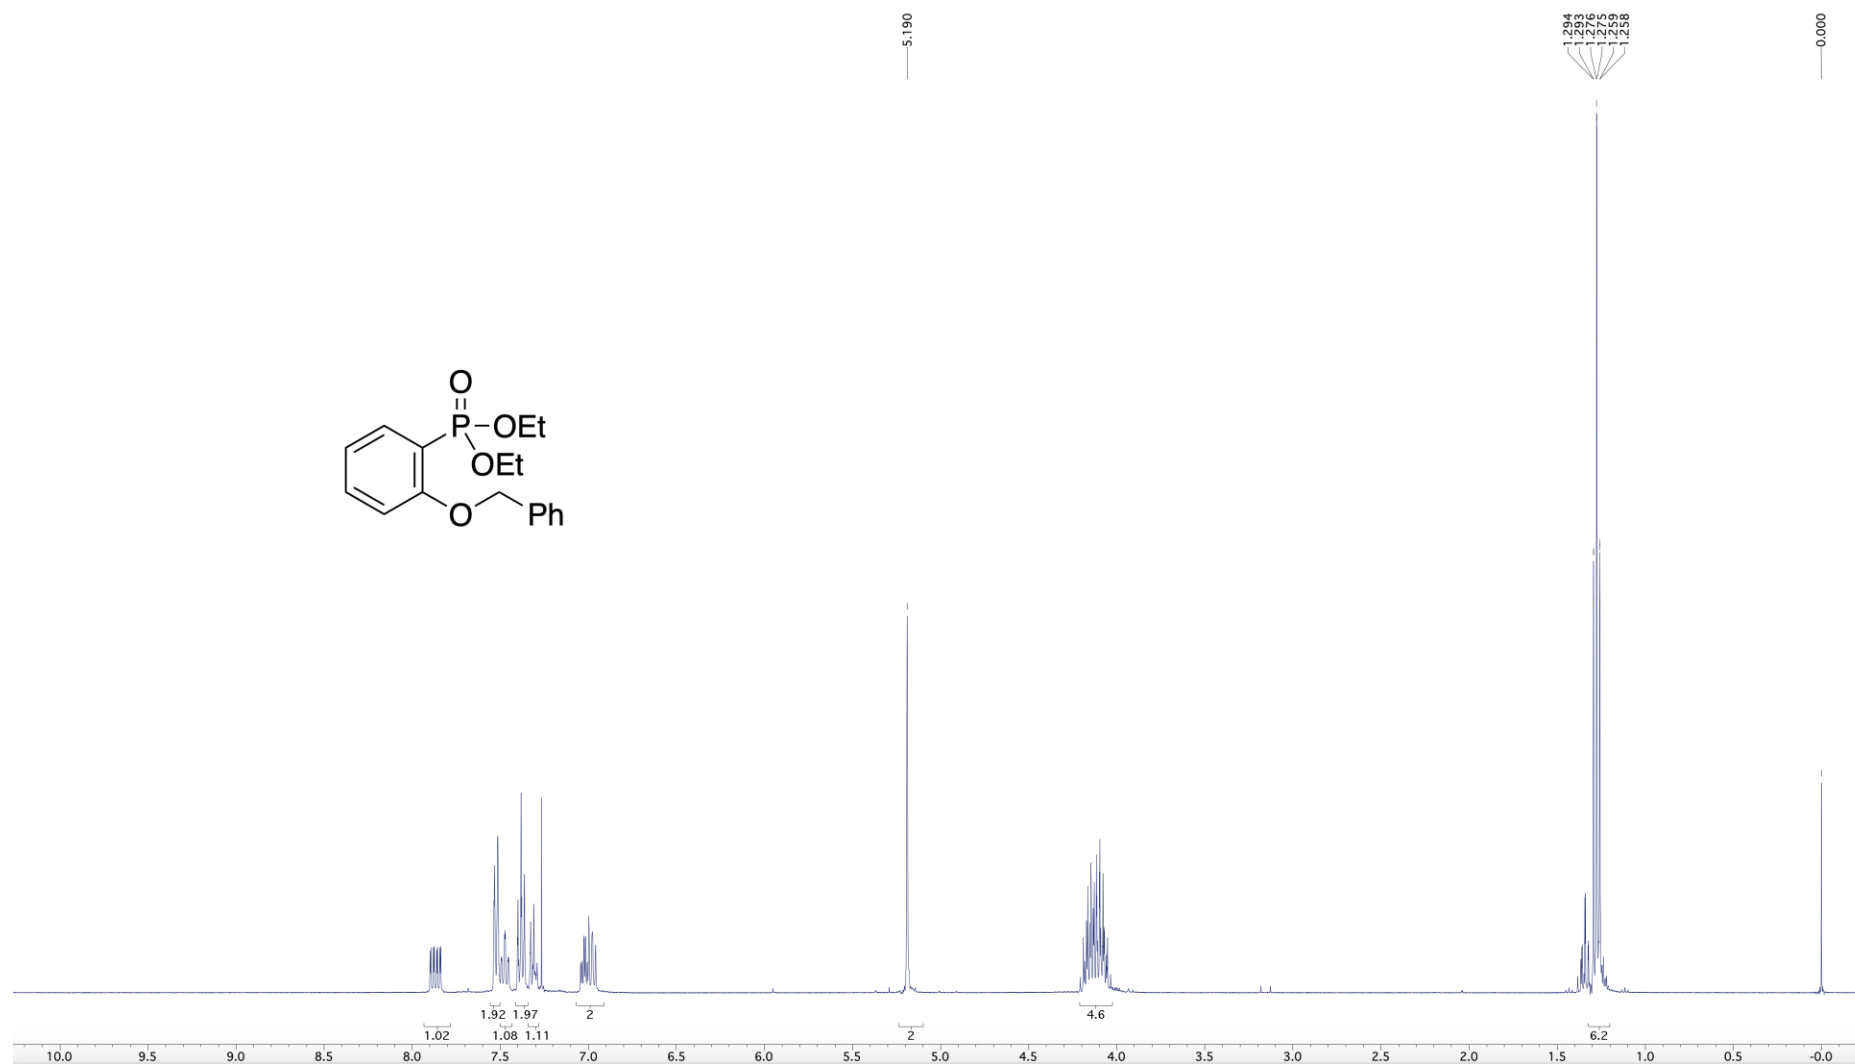

Figure S4. 162 MHz  $^{31}\text{P}$  NMR spectrum of **14**

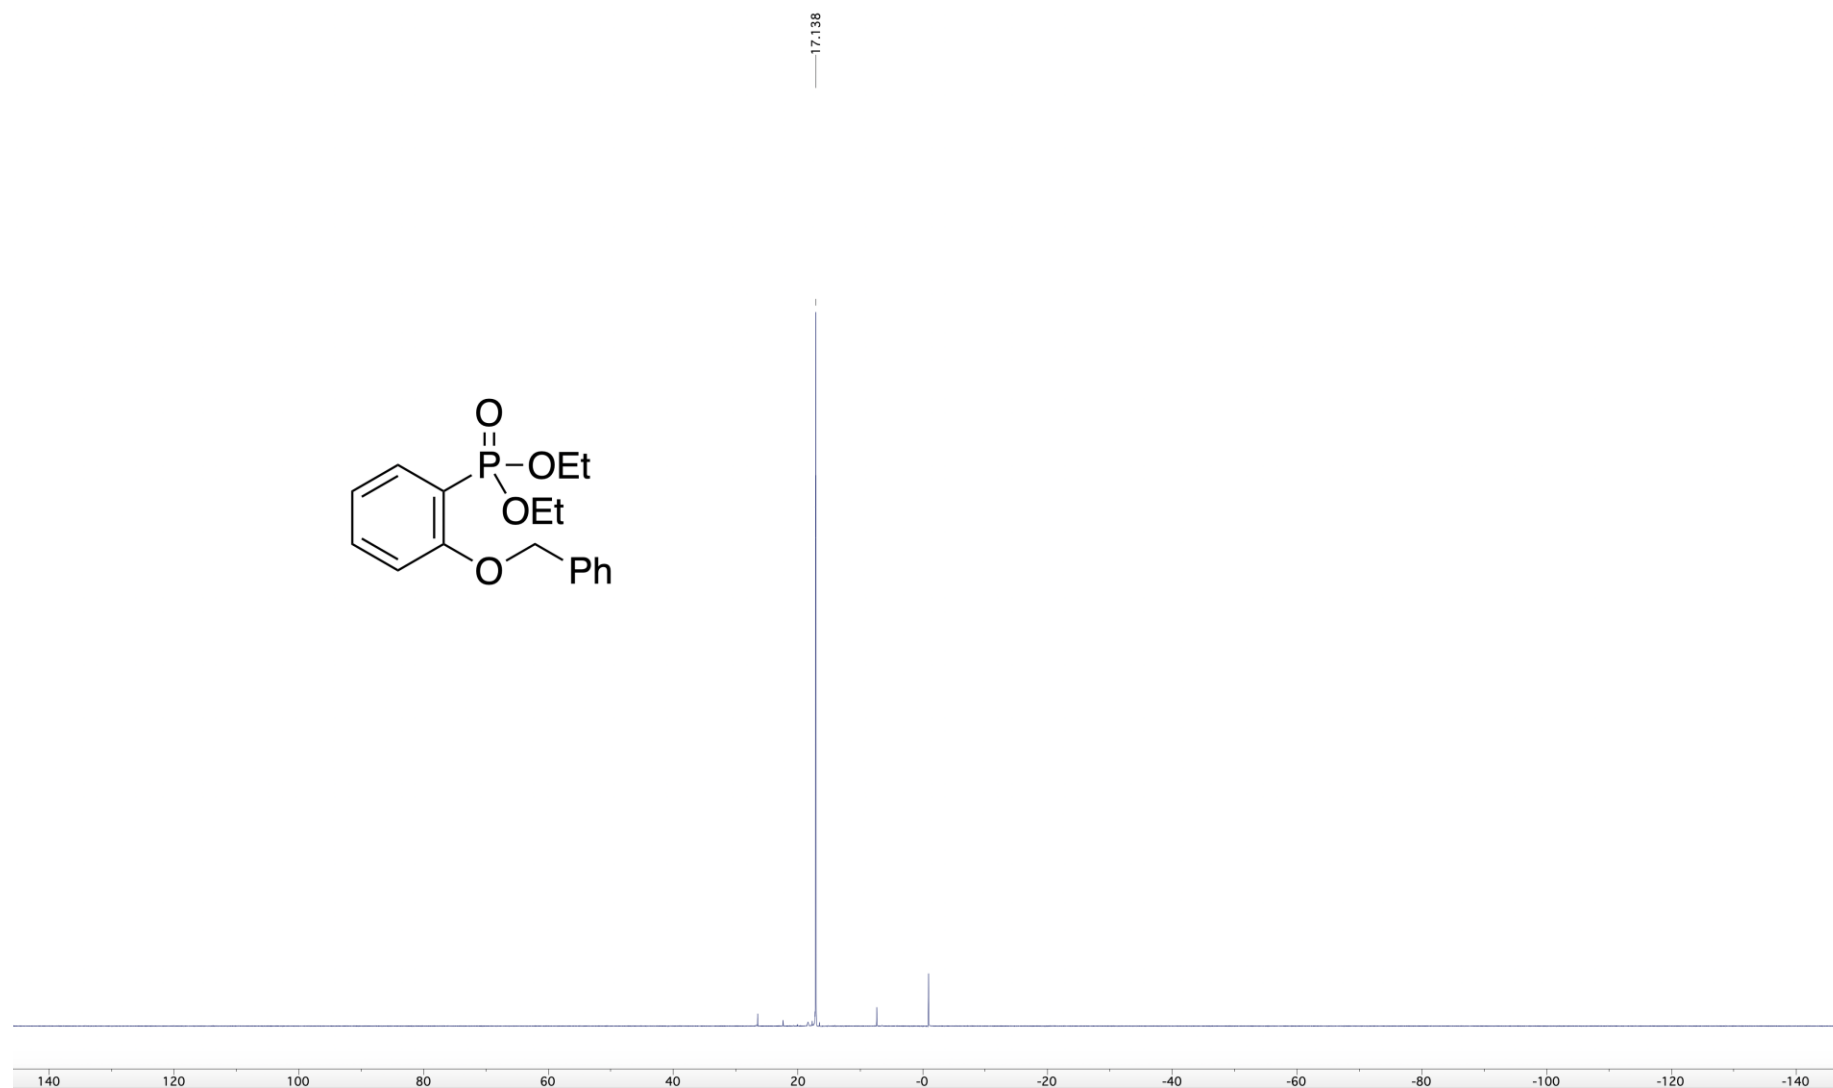

Figure S5. 100 MHz DEPTQ  $^{13}\text{C}$  NMR spectrum of **14**

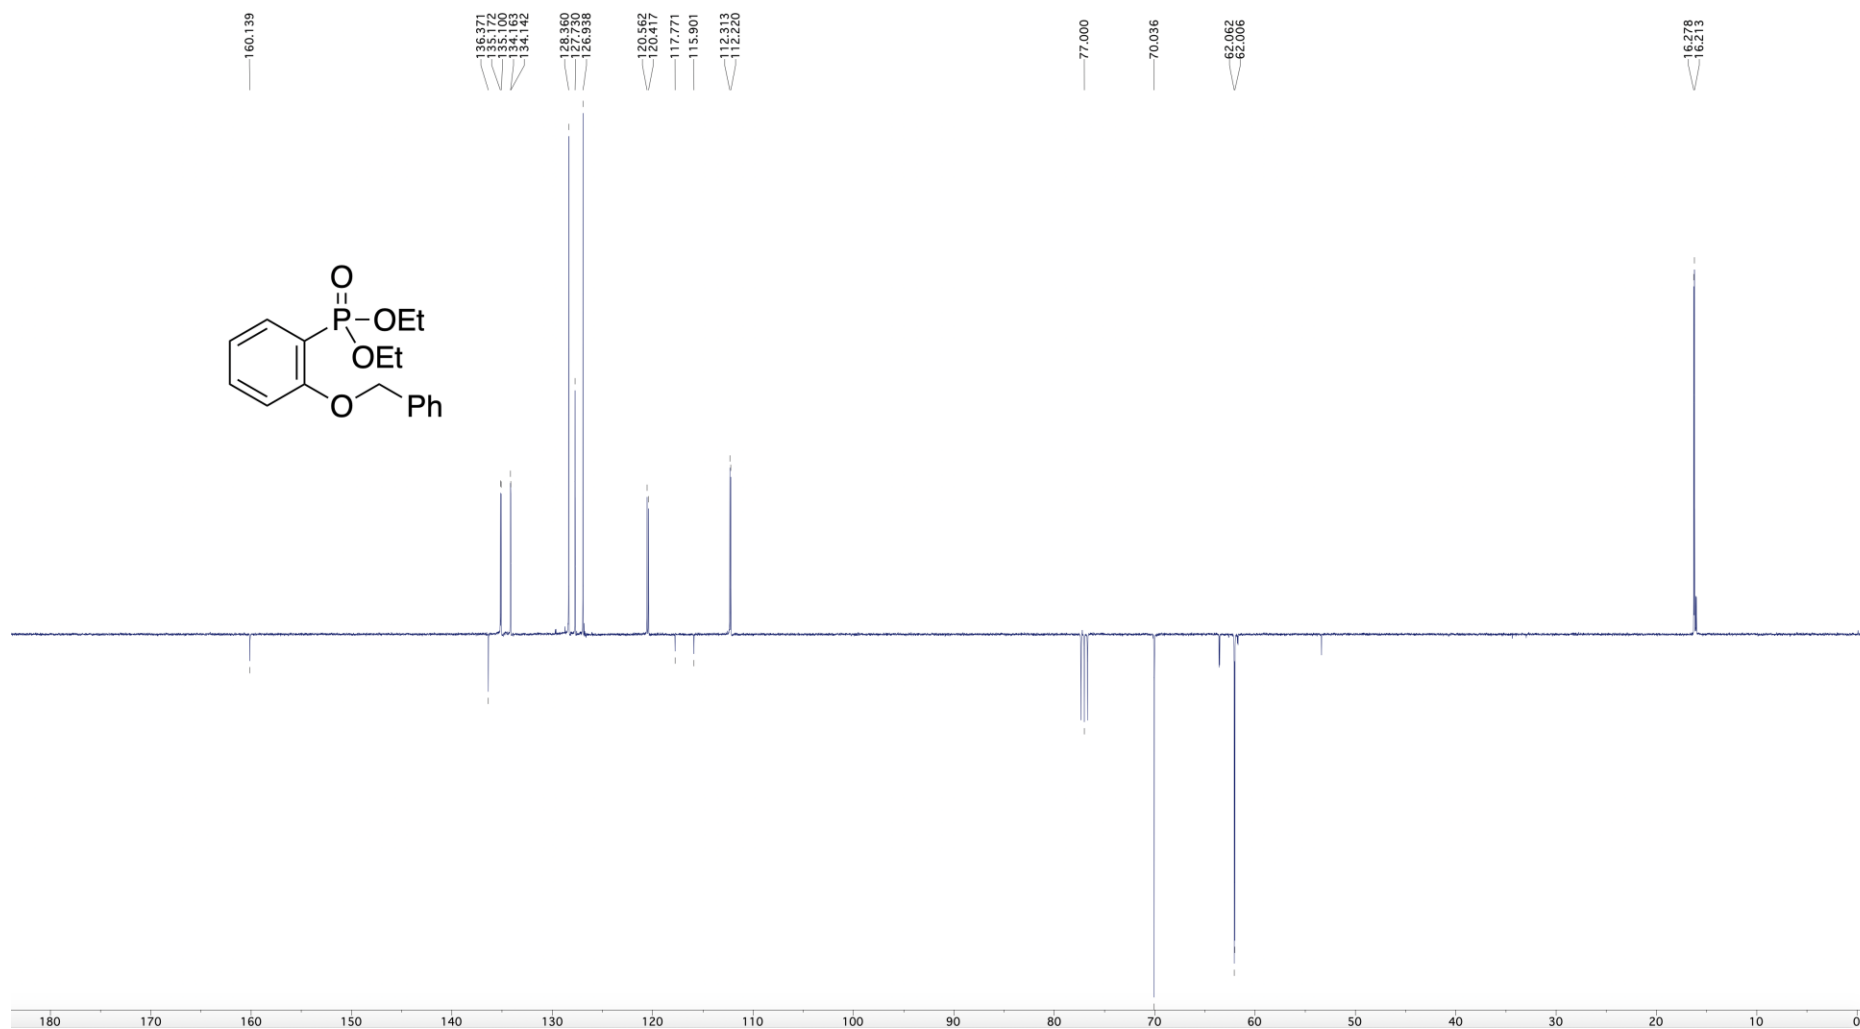

Figure S6. 400 MHz  $^1\text{H}$  NMR spectrum of **15**

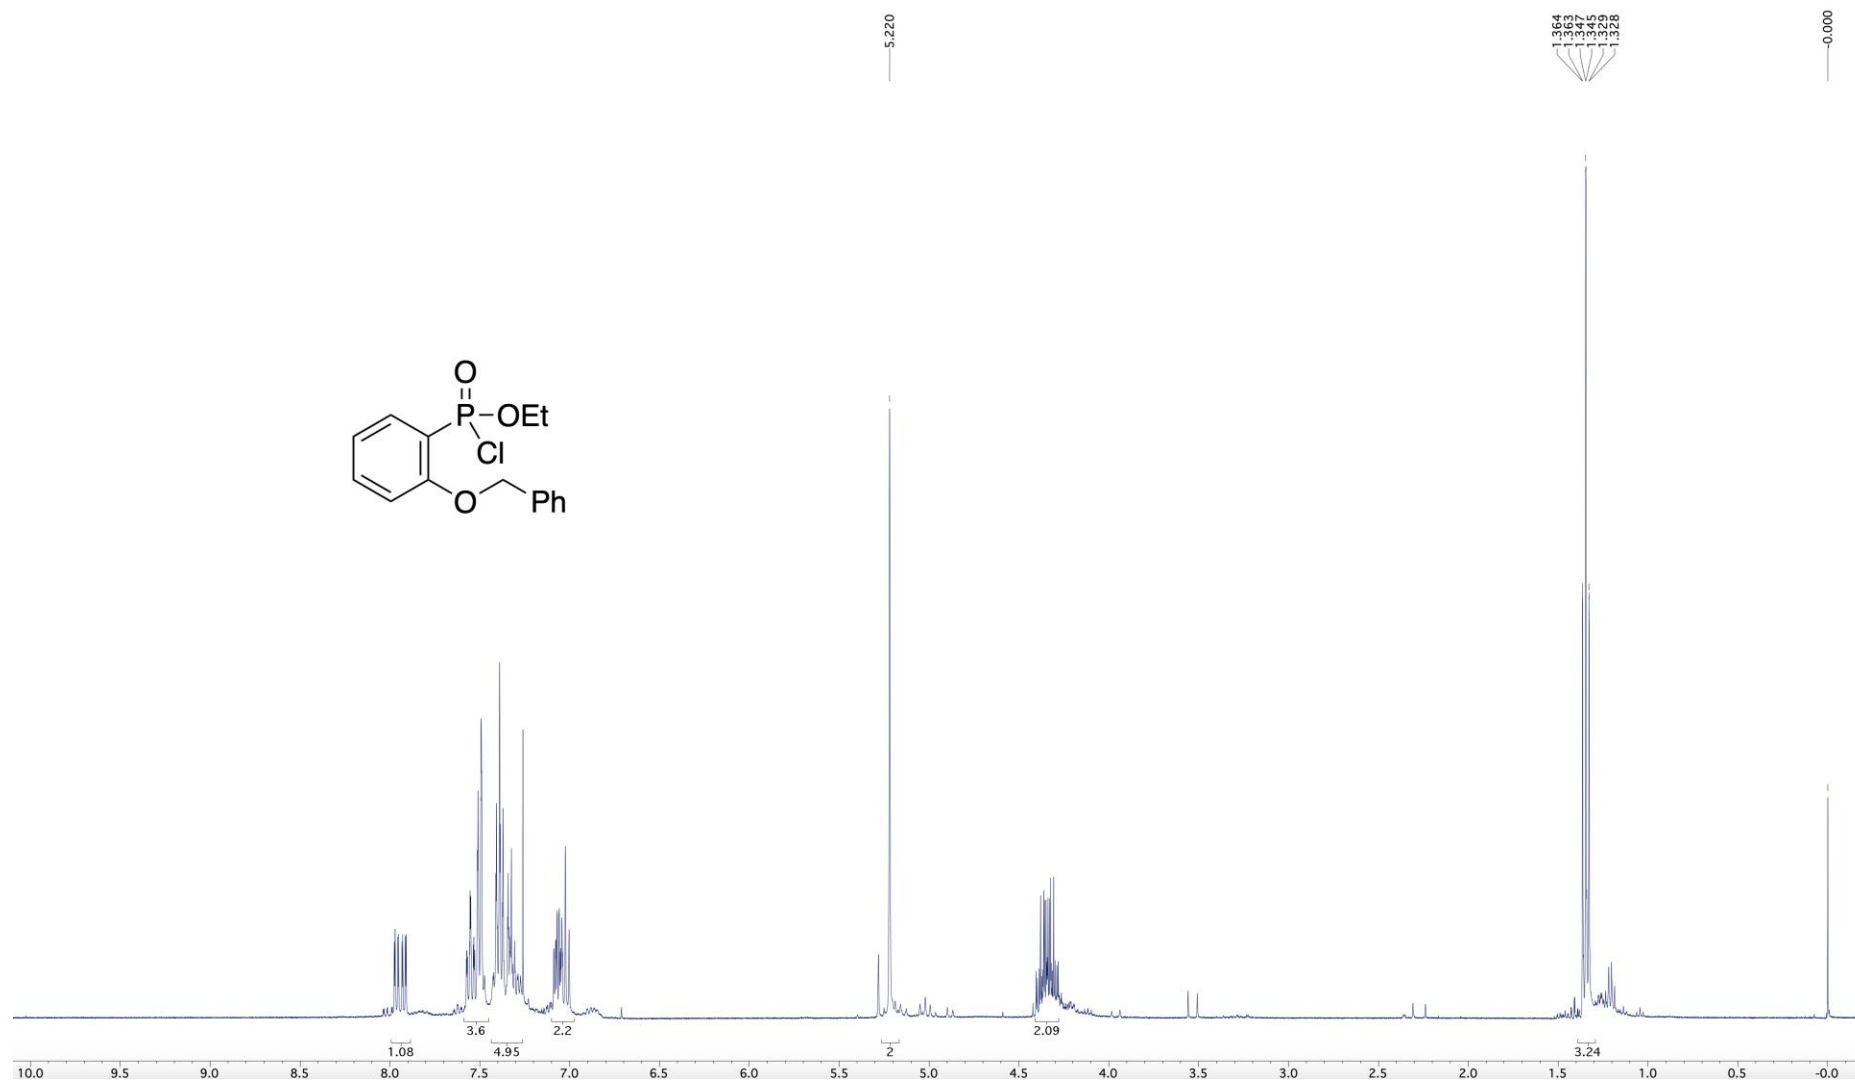

Figure S7. 162 MHz  $^{31}\text{P}$  NMR spectrum of **15**

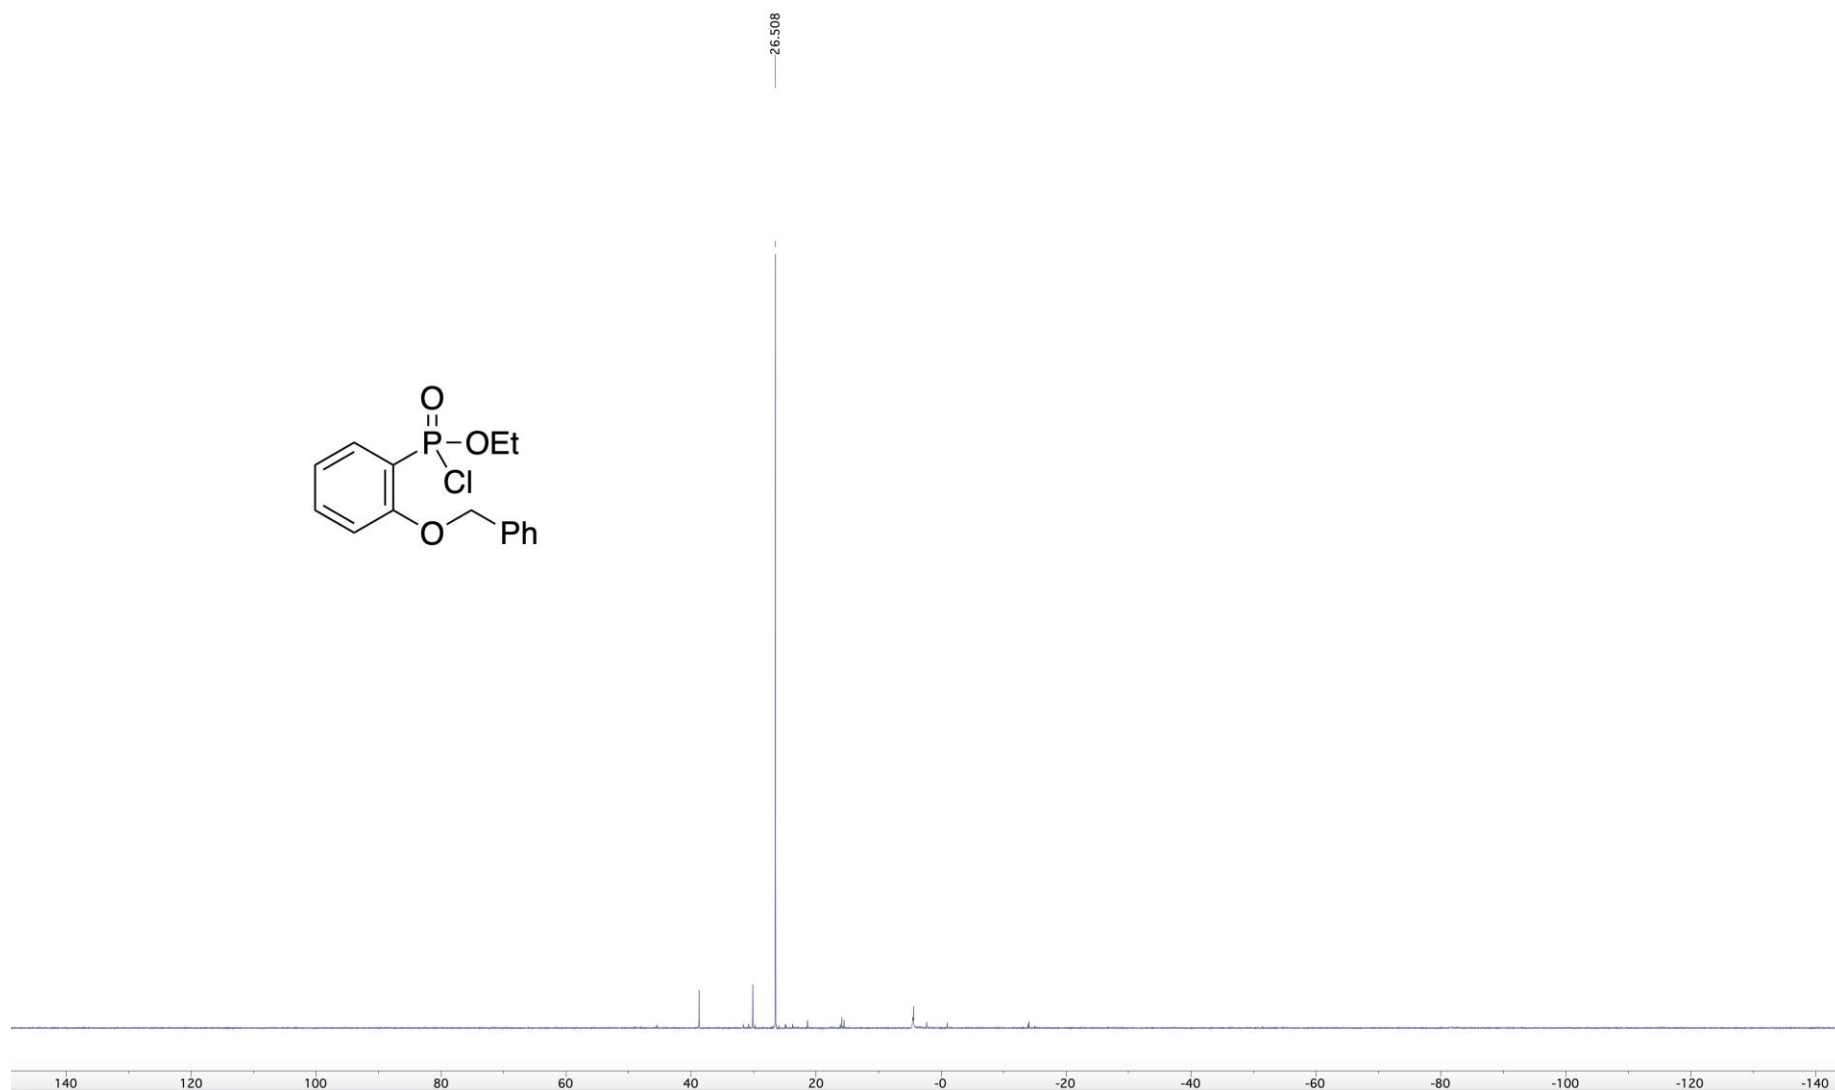

Figure S8. 125 MHz DEPTQ  $^{13}\text{C}$  NMR spectrum of **15**

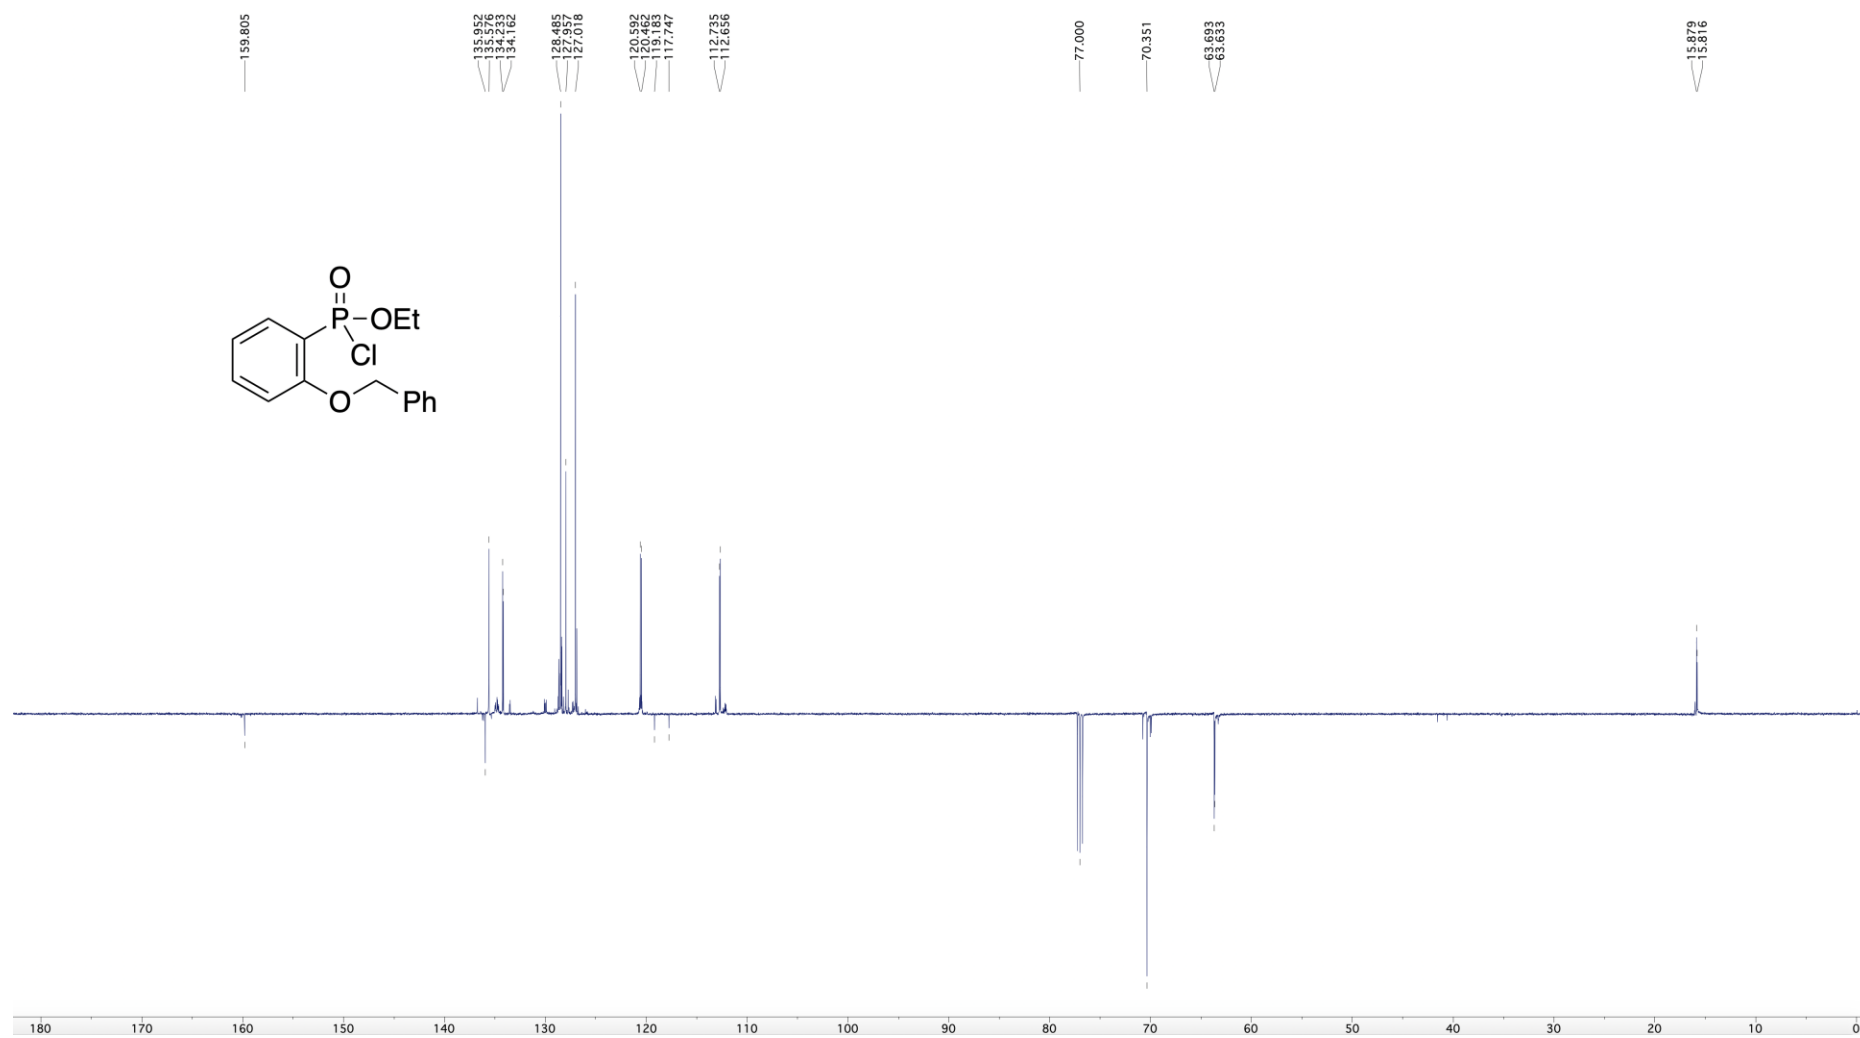

Figure S9. 400 MHz  $^1\text{H}$  NMR spectrum of **16**

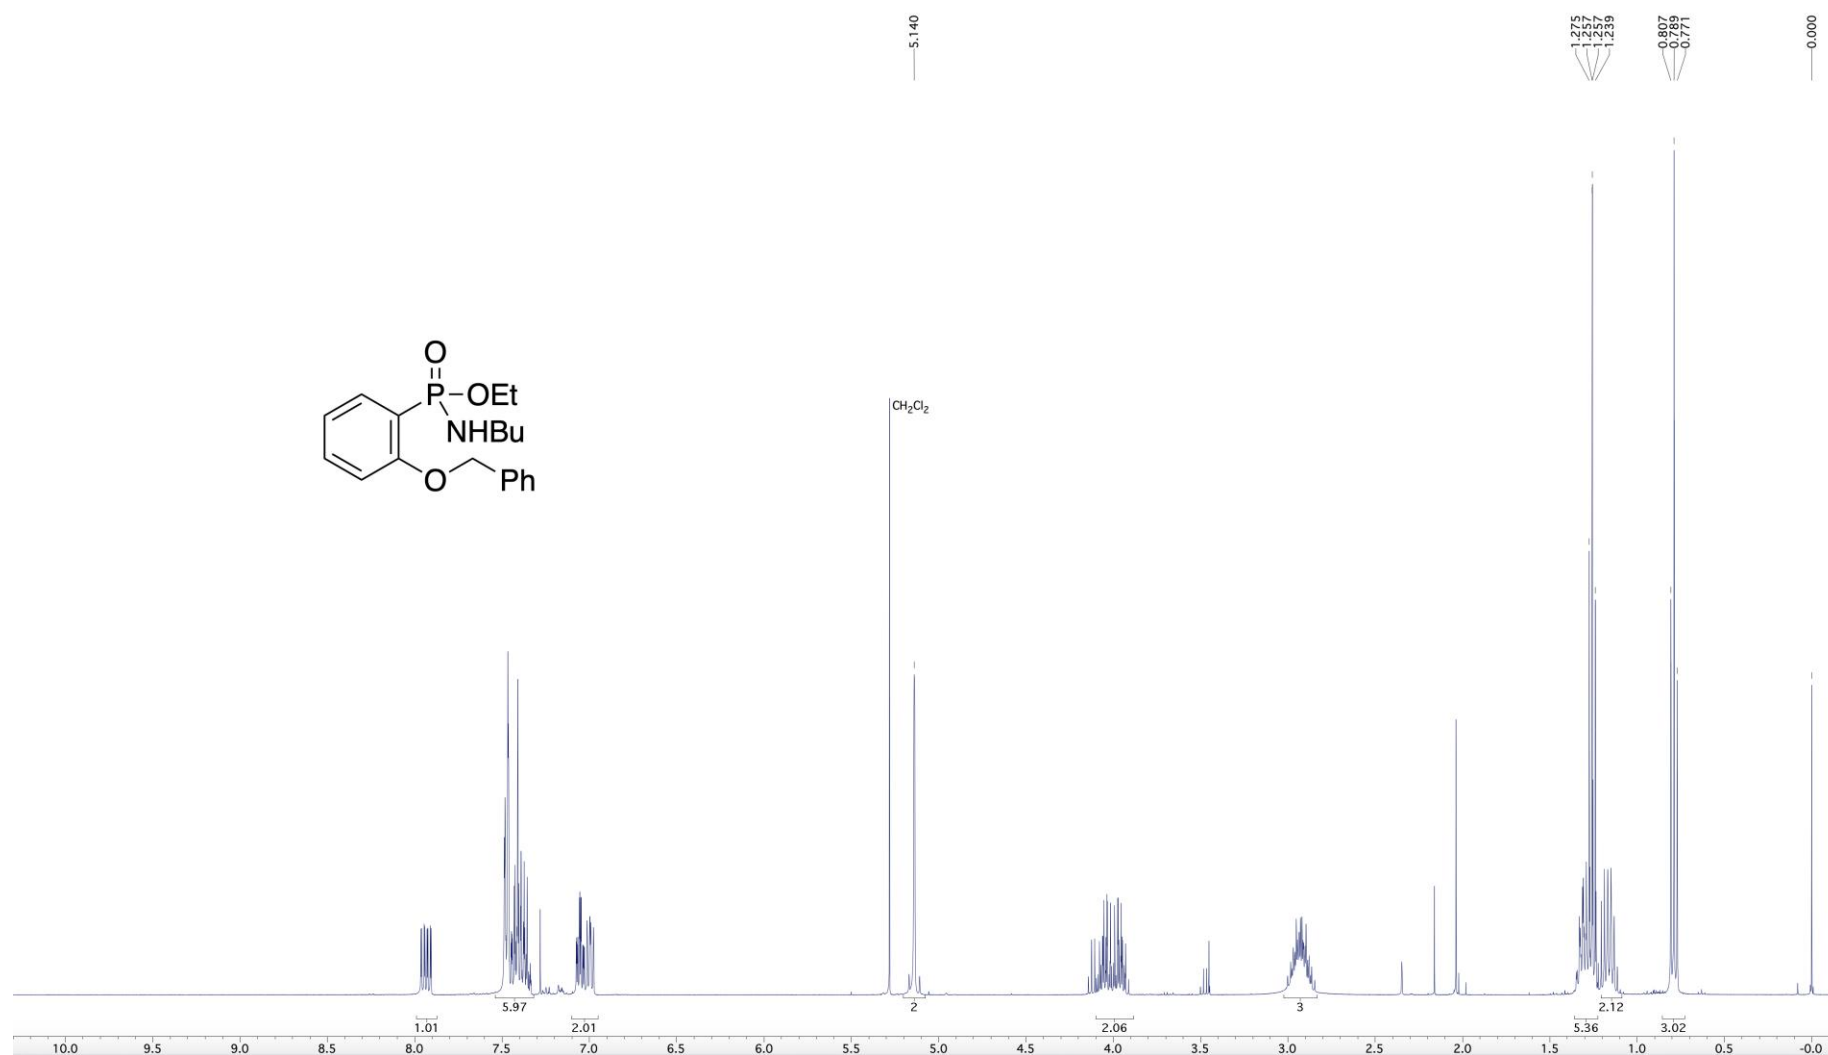



Figure S10. 162 MHz  $^{31}\text{P}$  NMR spectrum of **16**

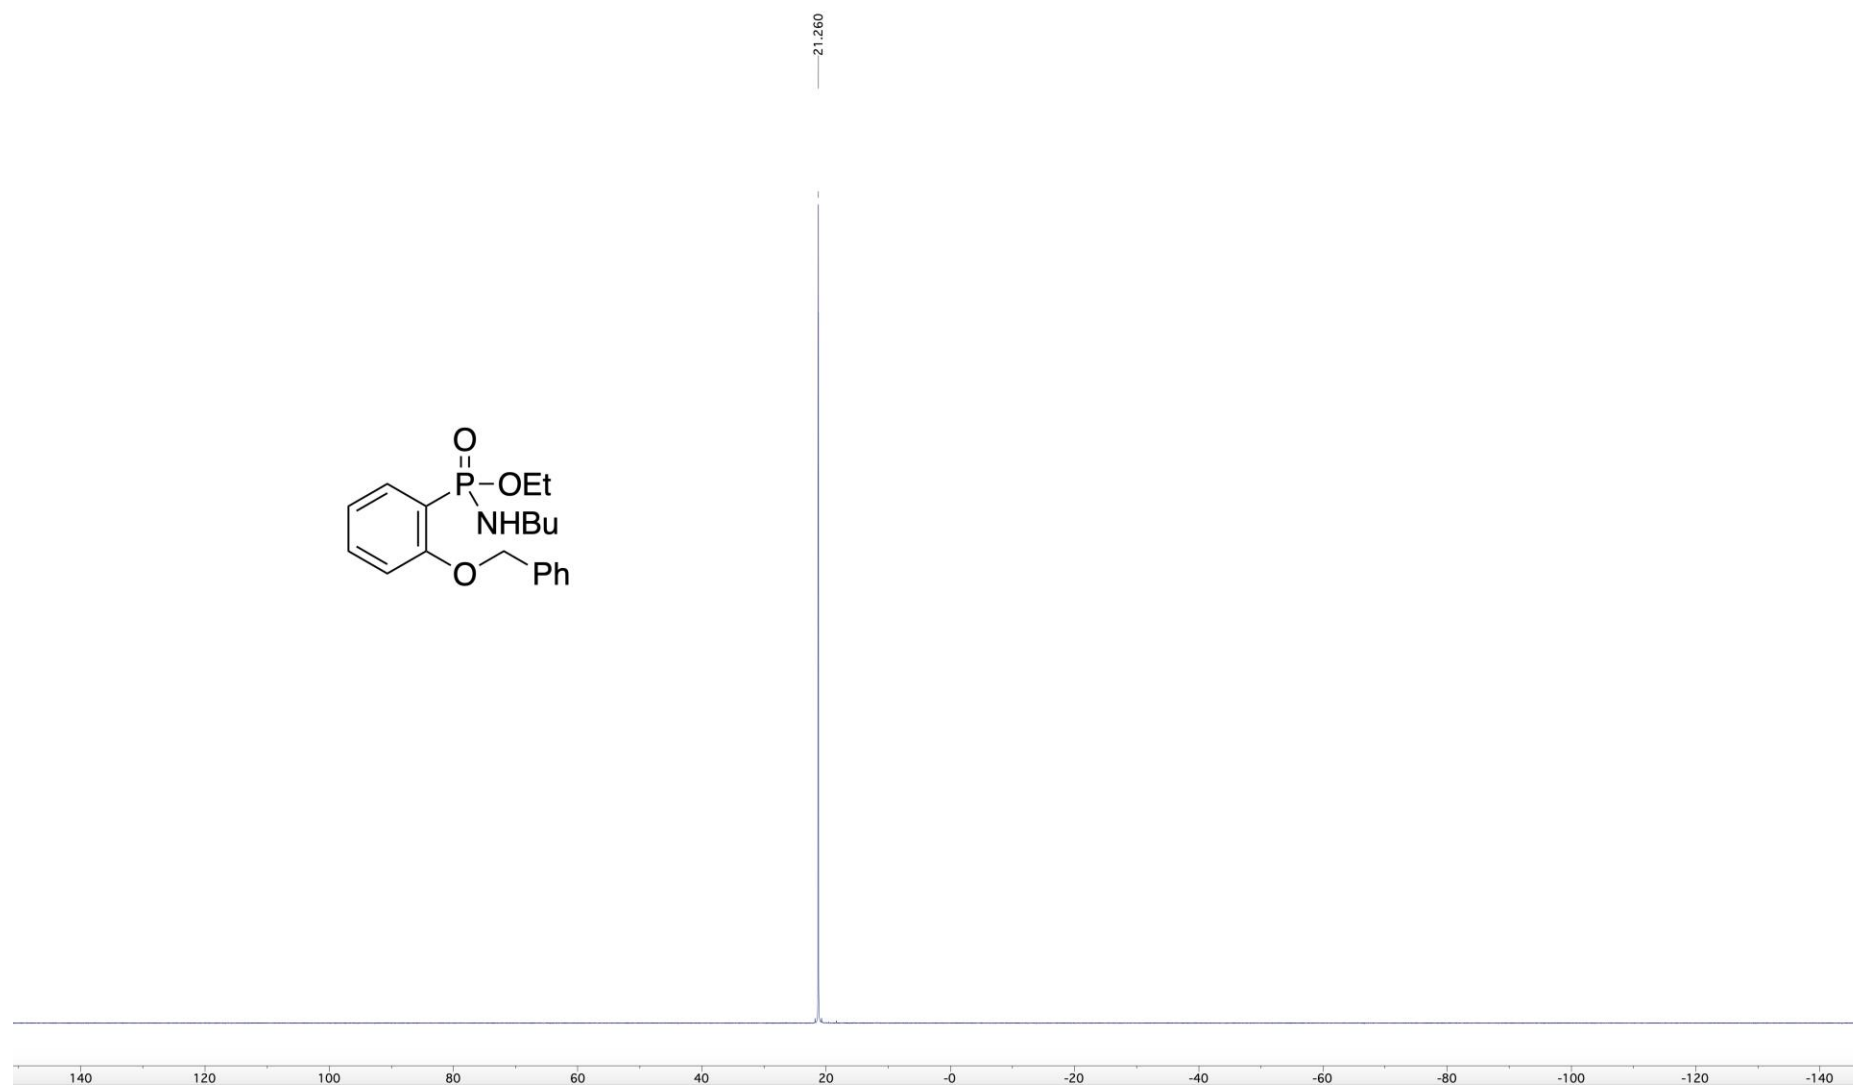

Figure S11. 125 MHz DEPTQ  $^{13}\text{C}$  NMR spectrum of **16**

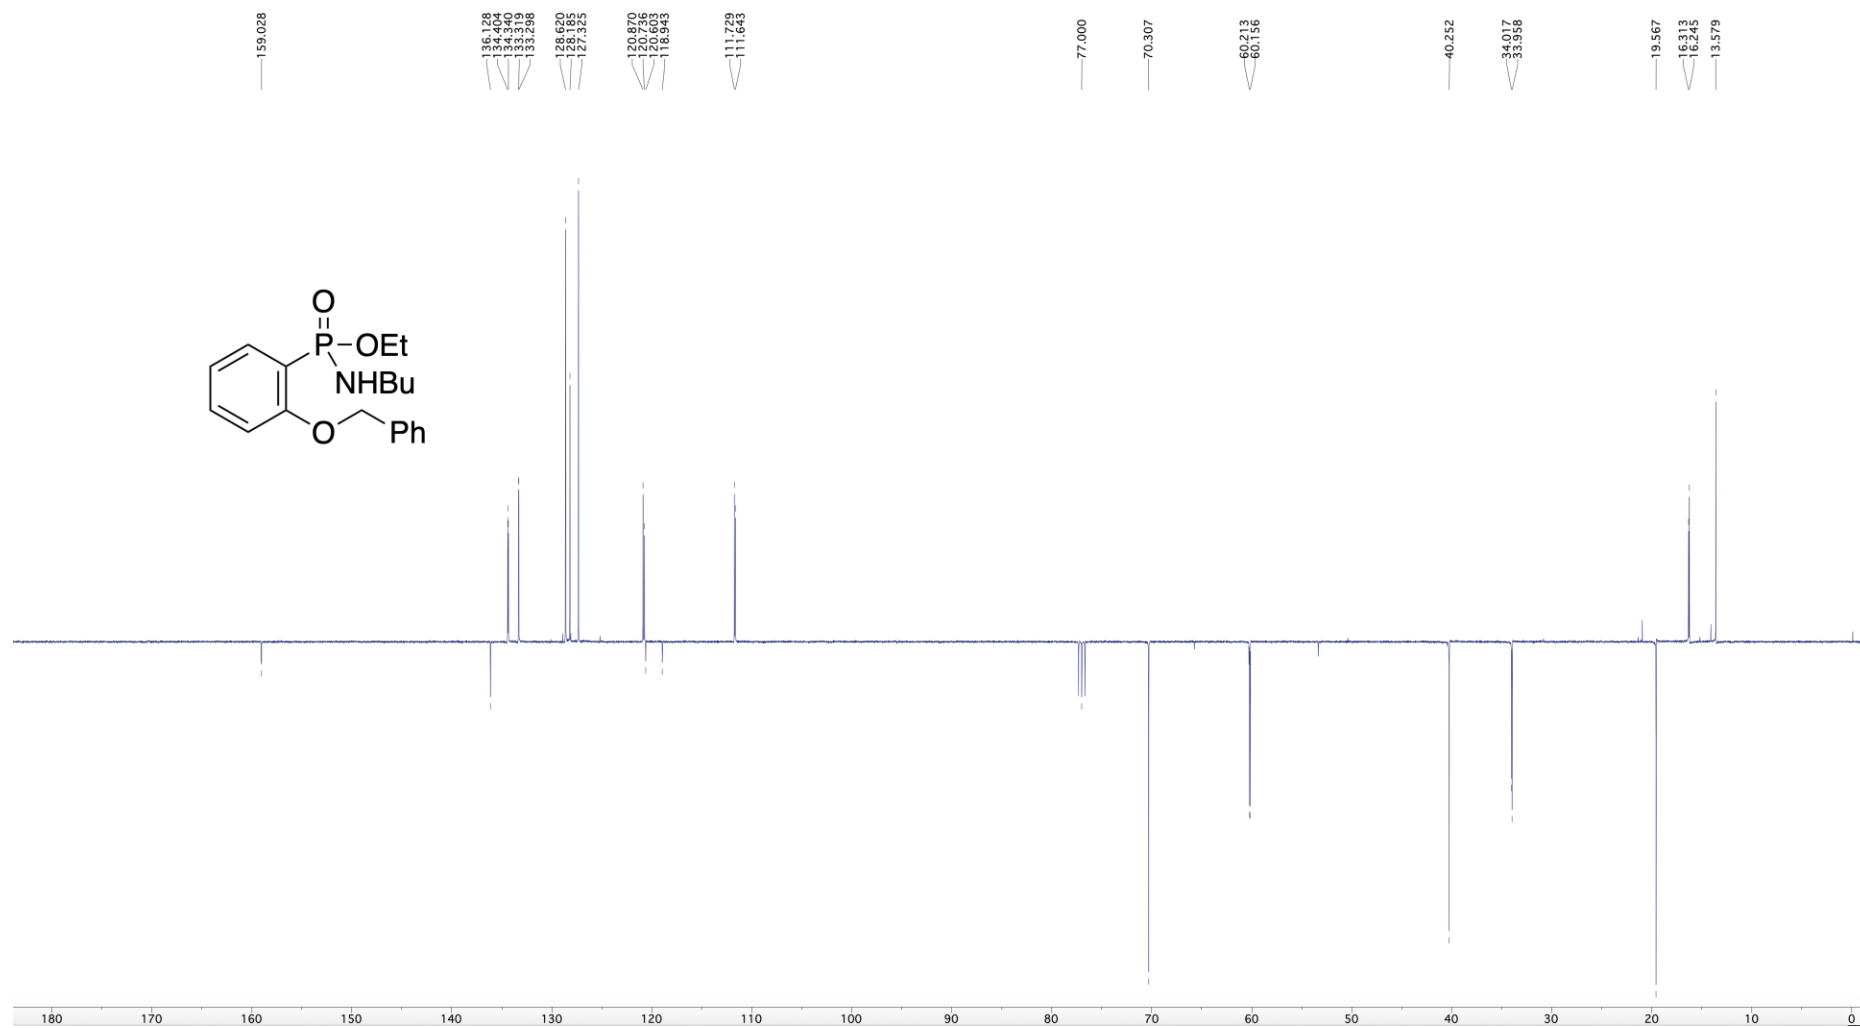

Figure S12. 400 MHz  $^1\text{H}$  NMR spectrum of **17**

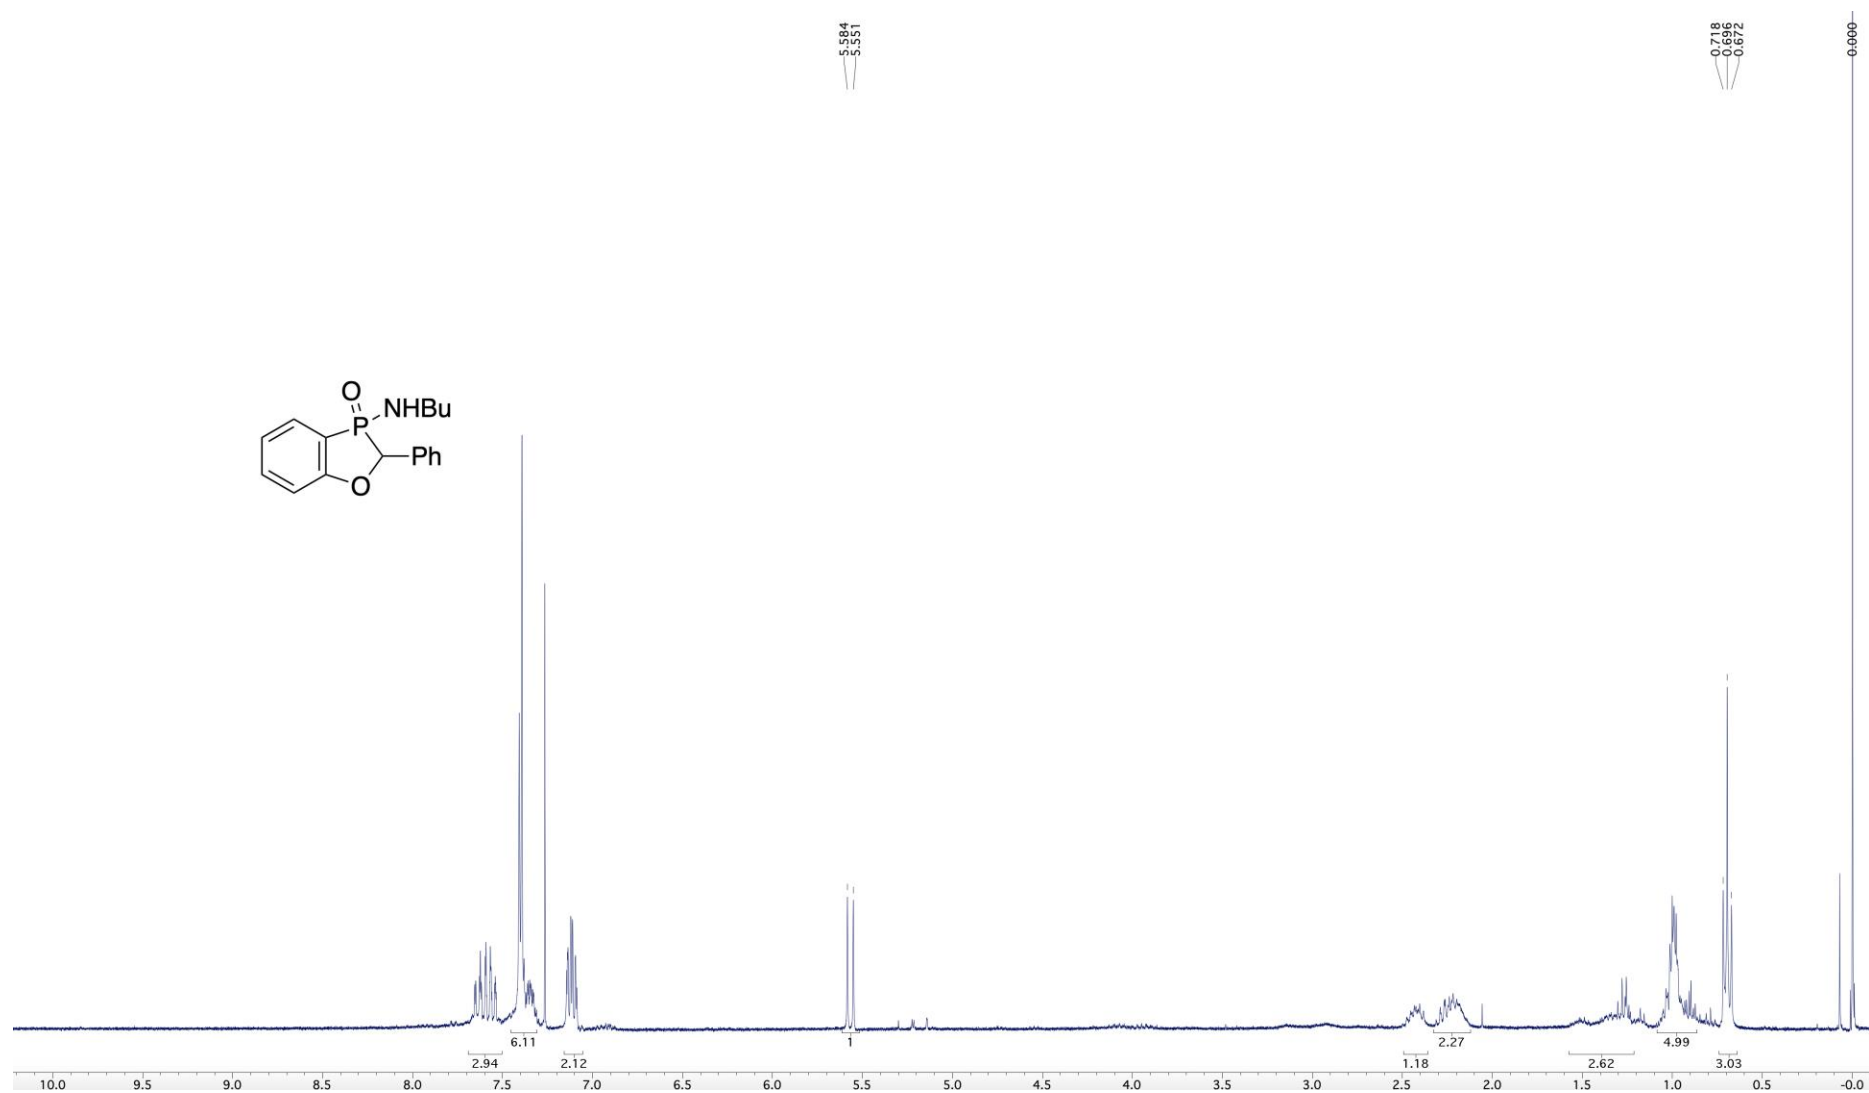

Figure S13. 400 MHz  $^1\text{H}$  NMR spectrum of **17** ( $^{31}\text{P}$  decoupled)

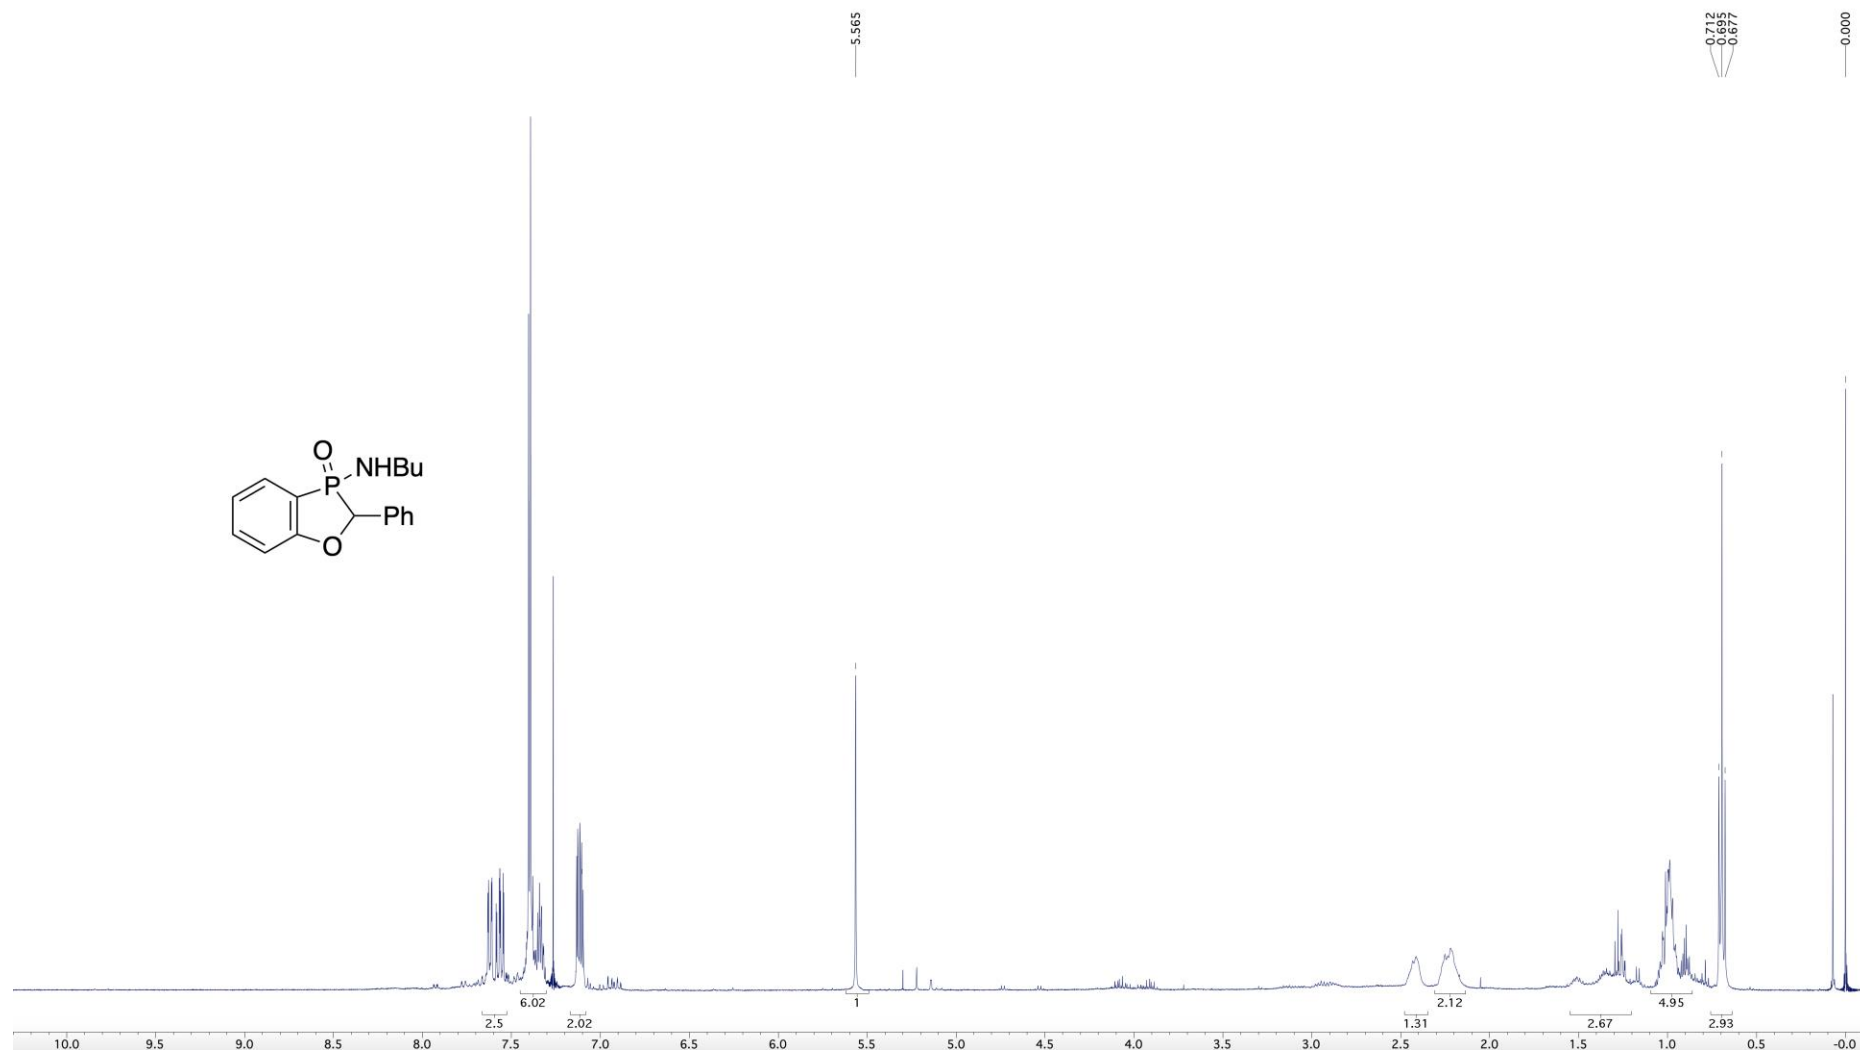

Figure S14. 202 MHz  $^{31}\text{P}$  NMR spectrum of **17**

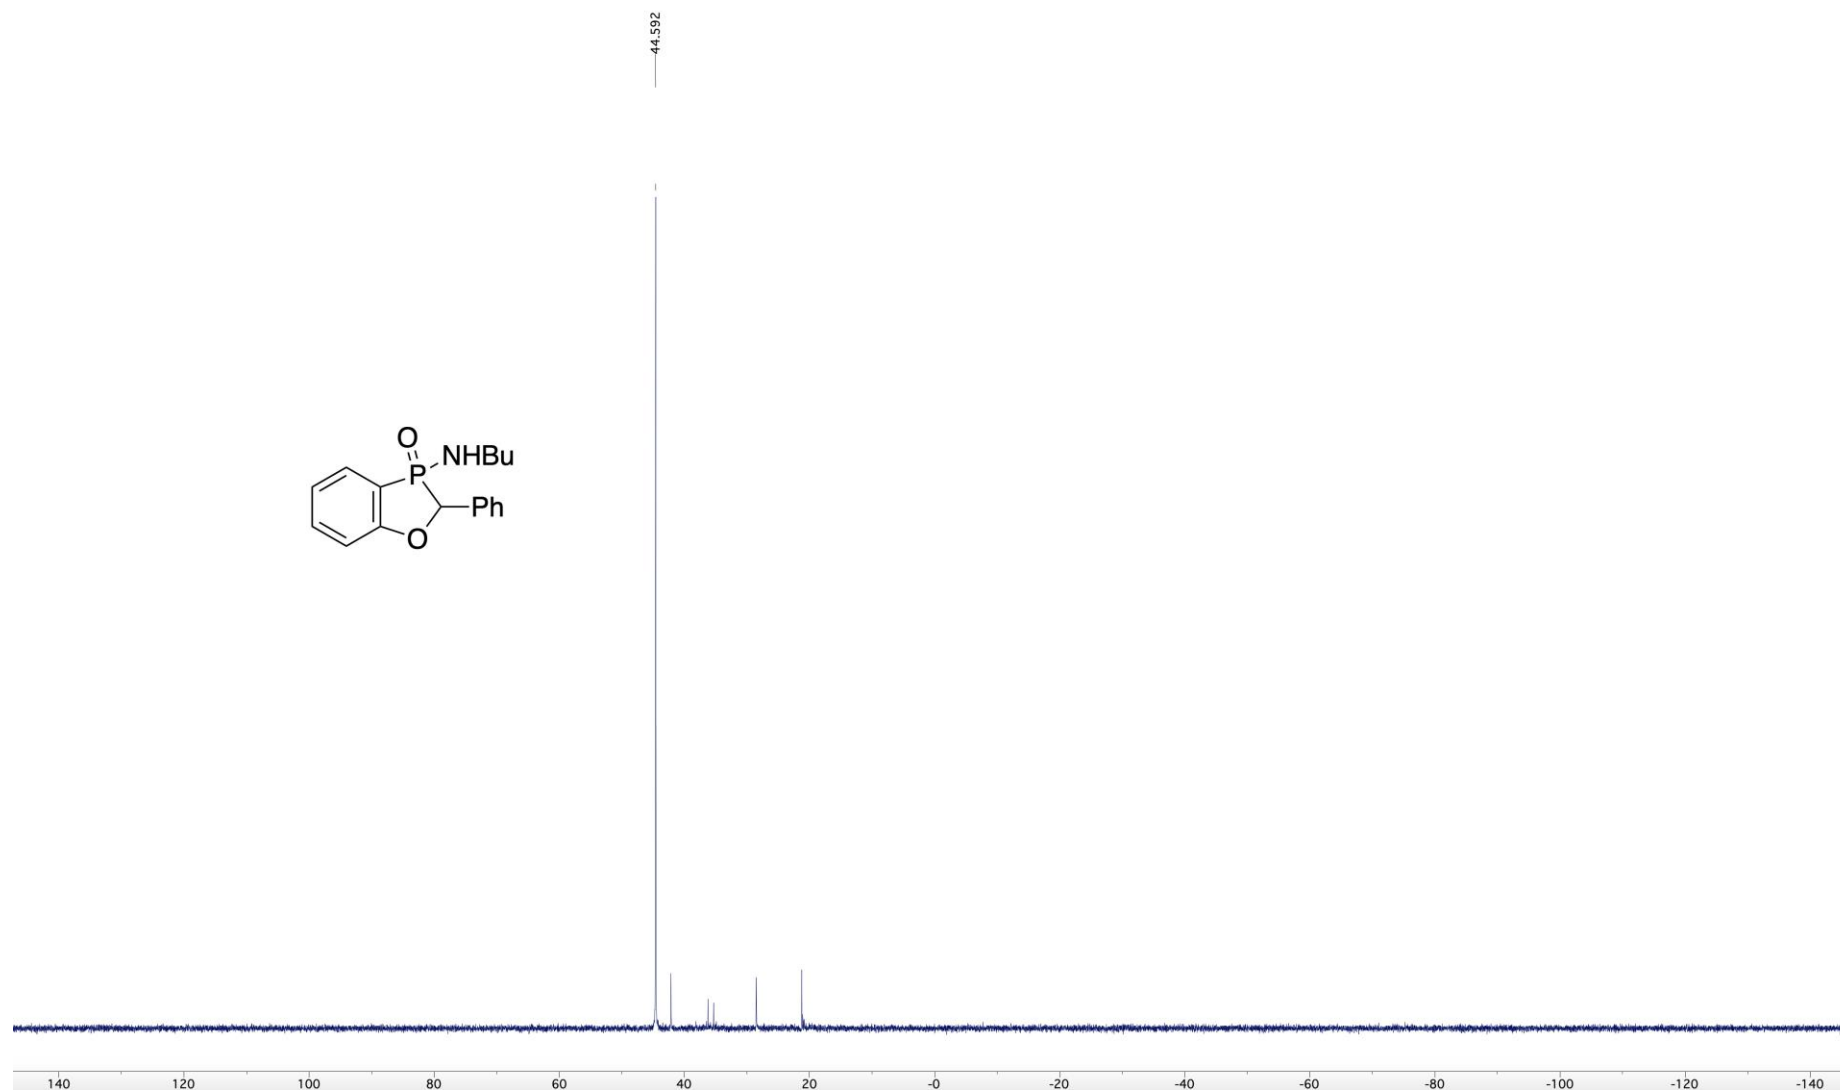

Figure S15. 100 MHz DEPTQ  $^{13}\text{C}$  NMR spectrum of **17**

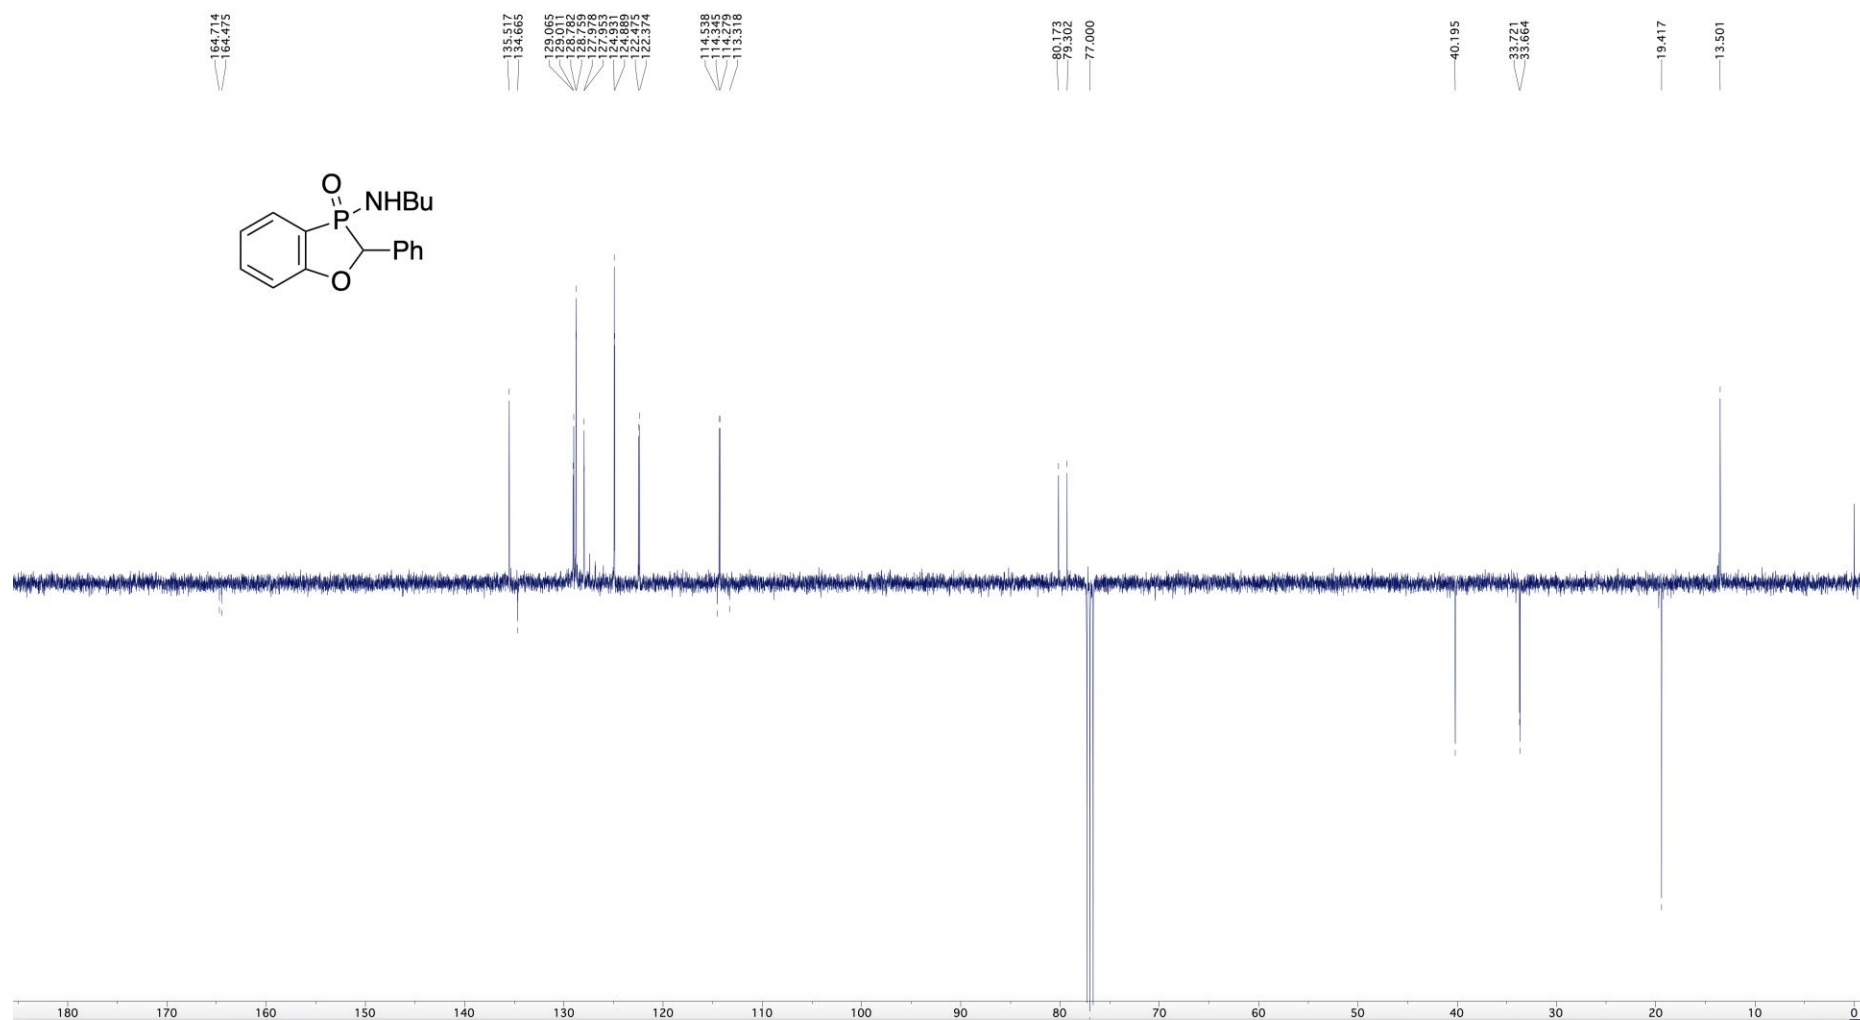

Figure S16. 300 MHz  $^1\text{H}$  NMR spectrum of **18a**

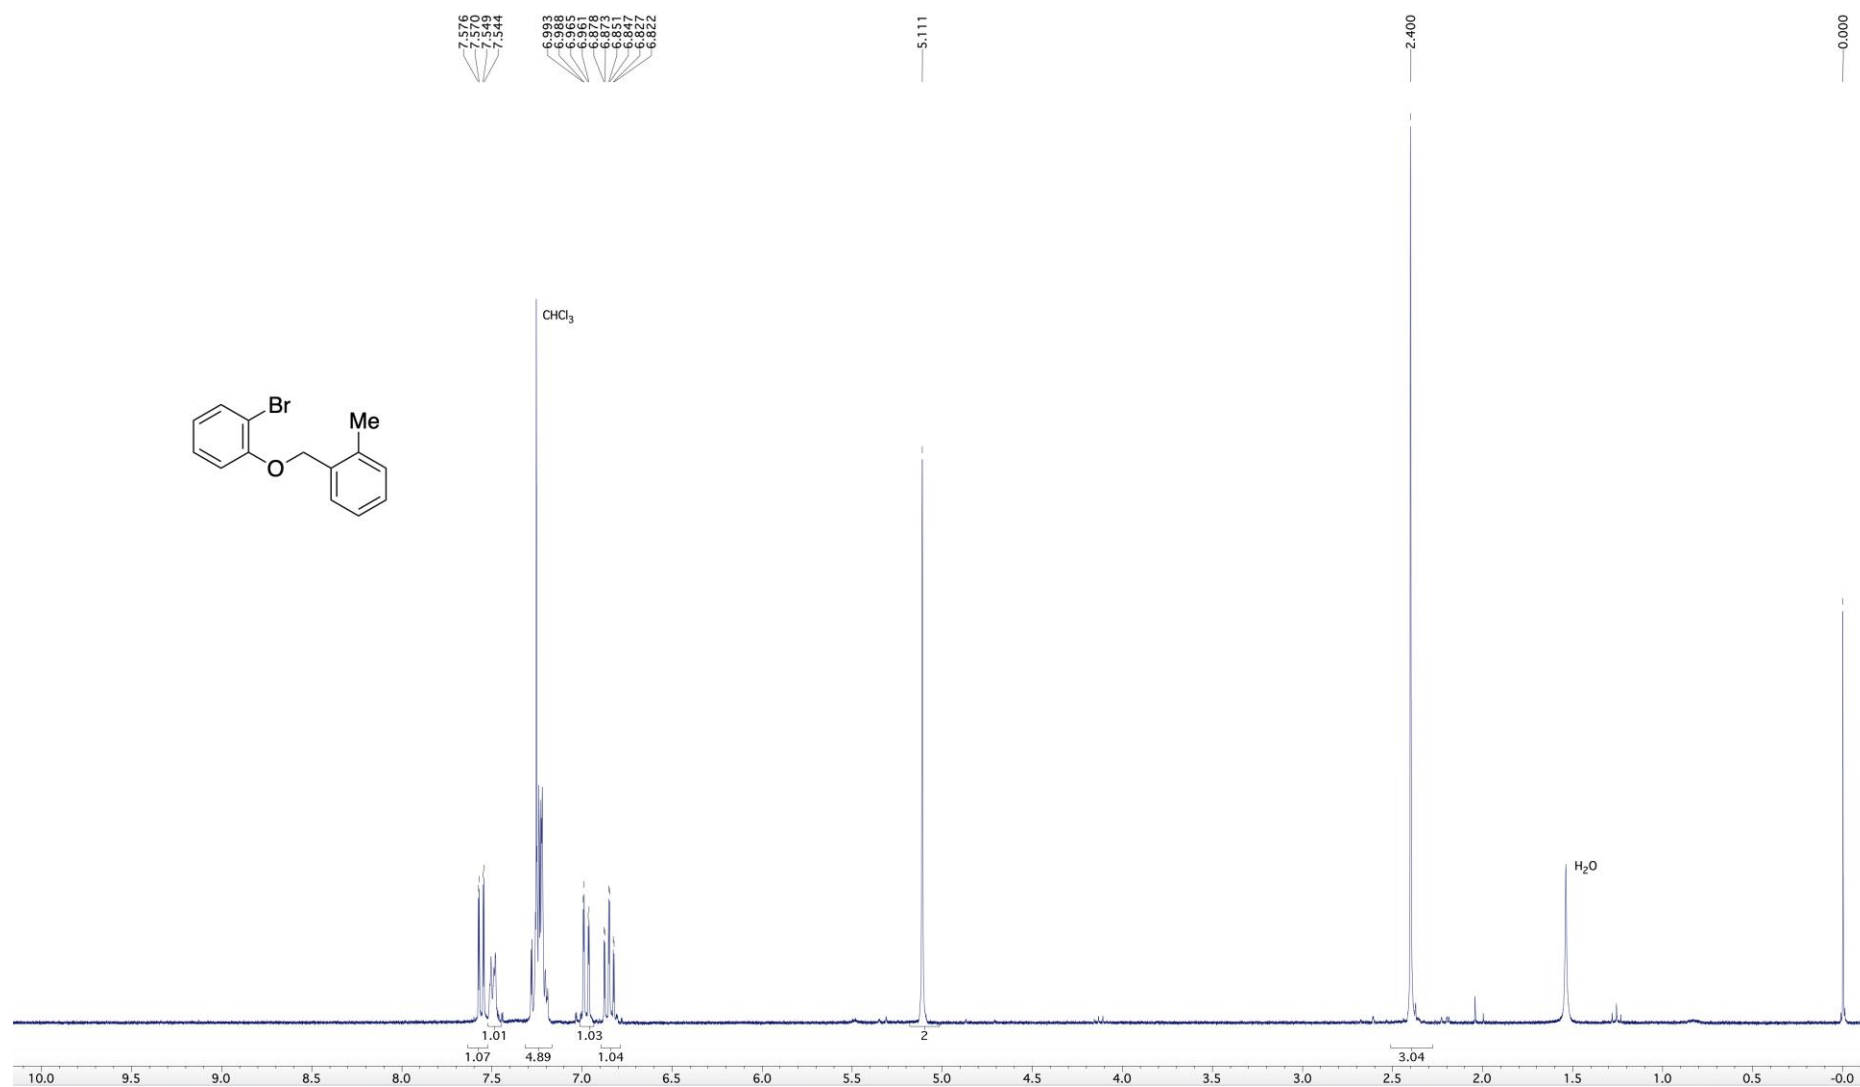

Figure S17. 75 MHz DEPTQ  $^{13}\text{C}$  NMR spectrum of **18a**

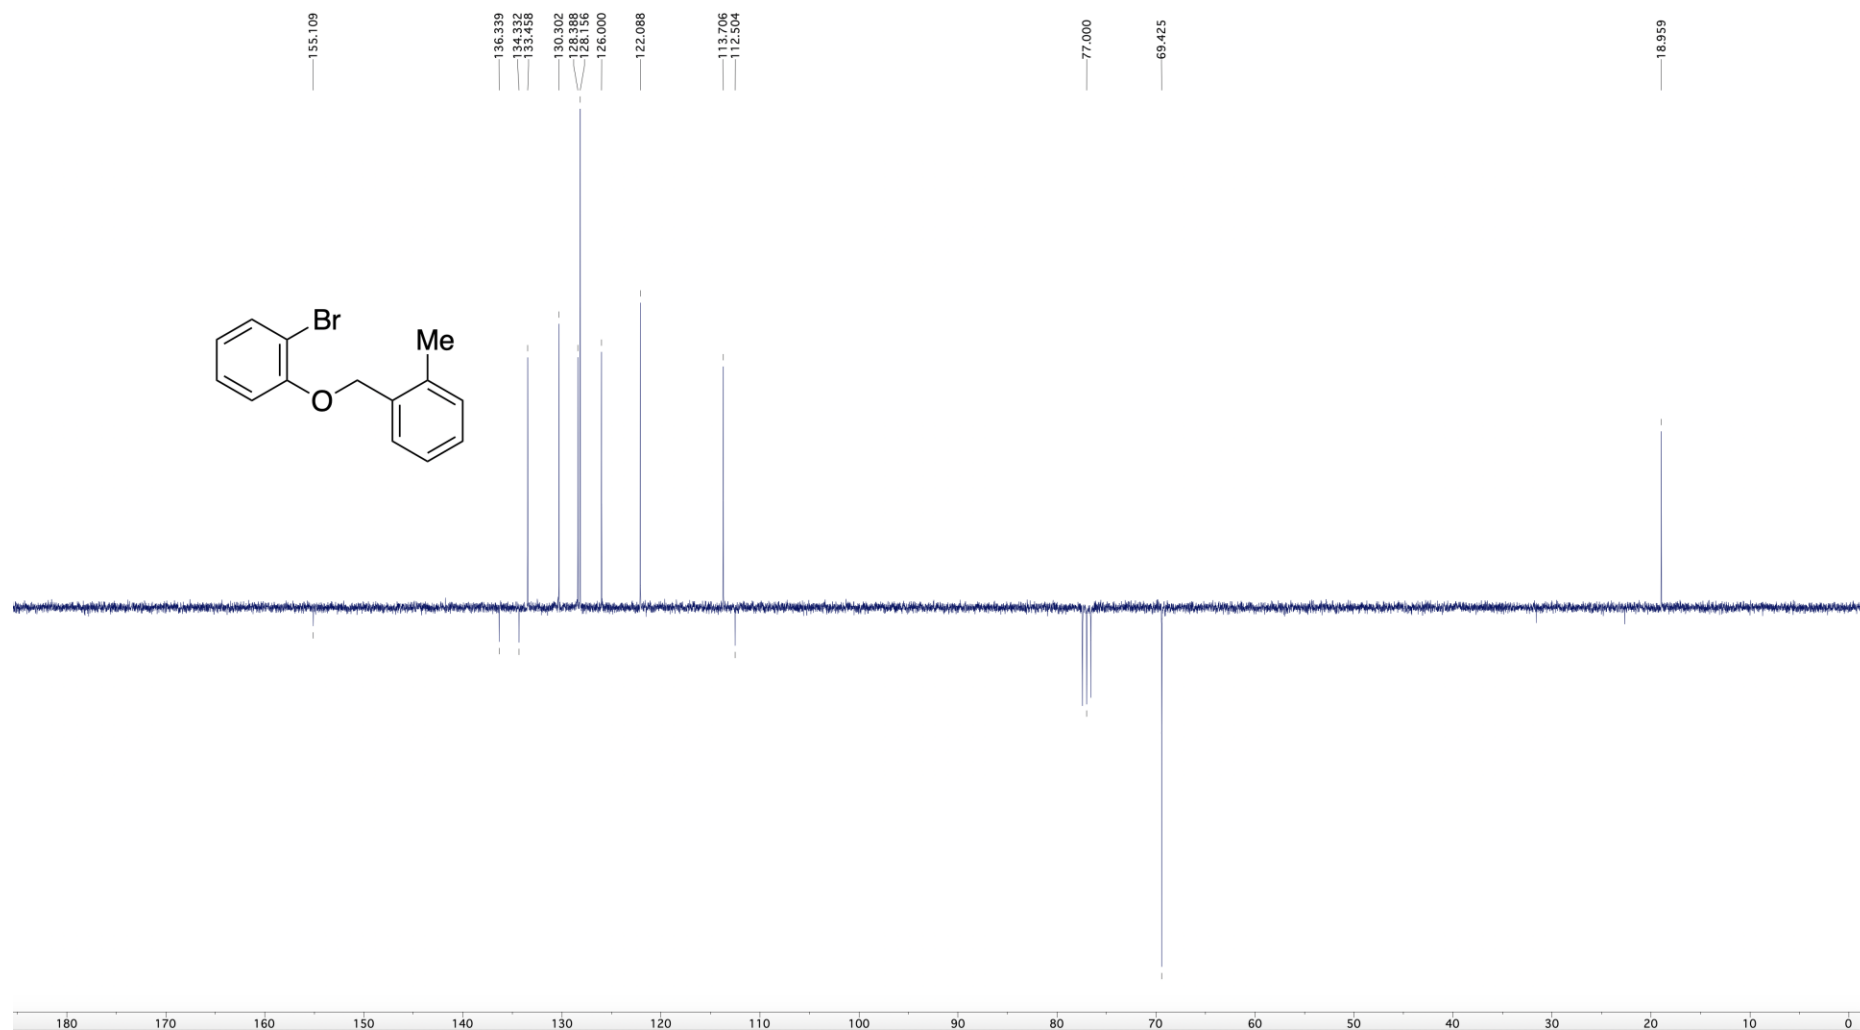



Figure S18. 300 MHz  $^1\text{H}$  NMR spectrum of **18b**

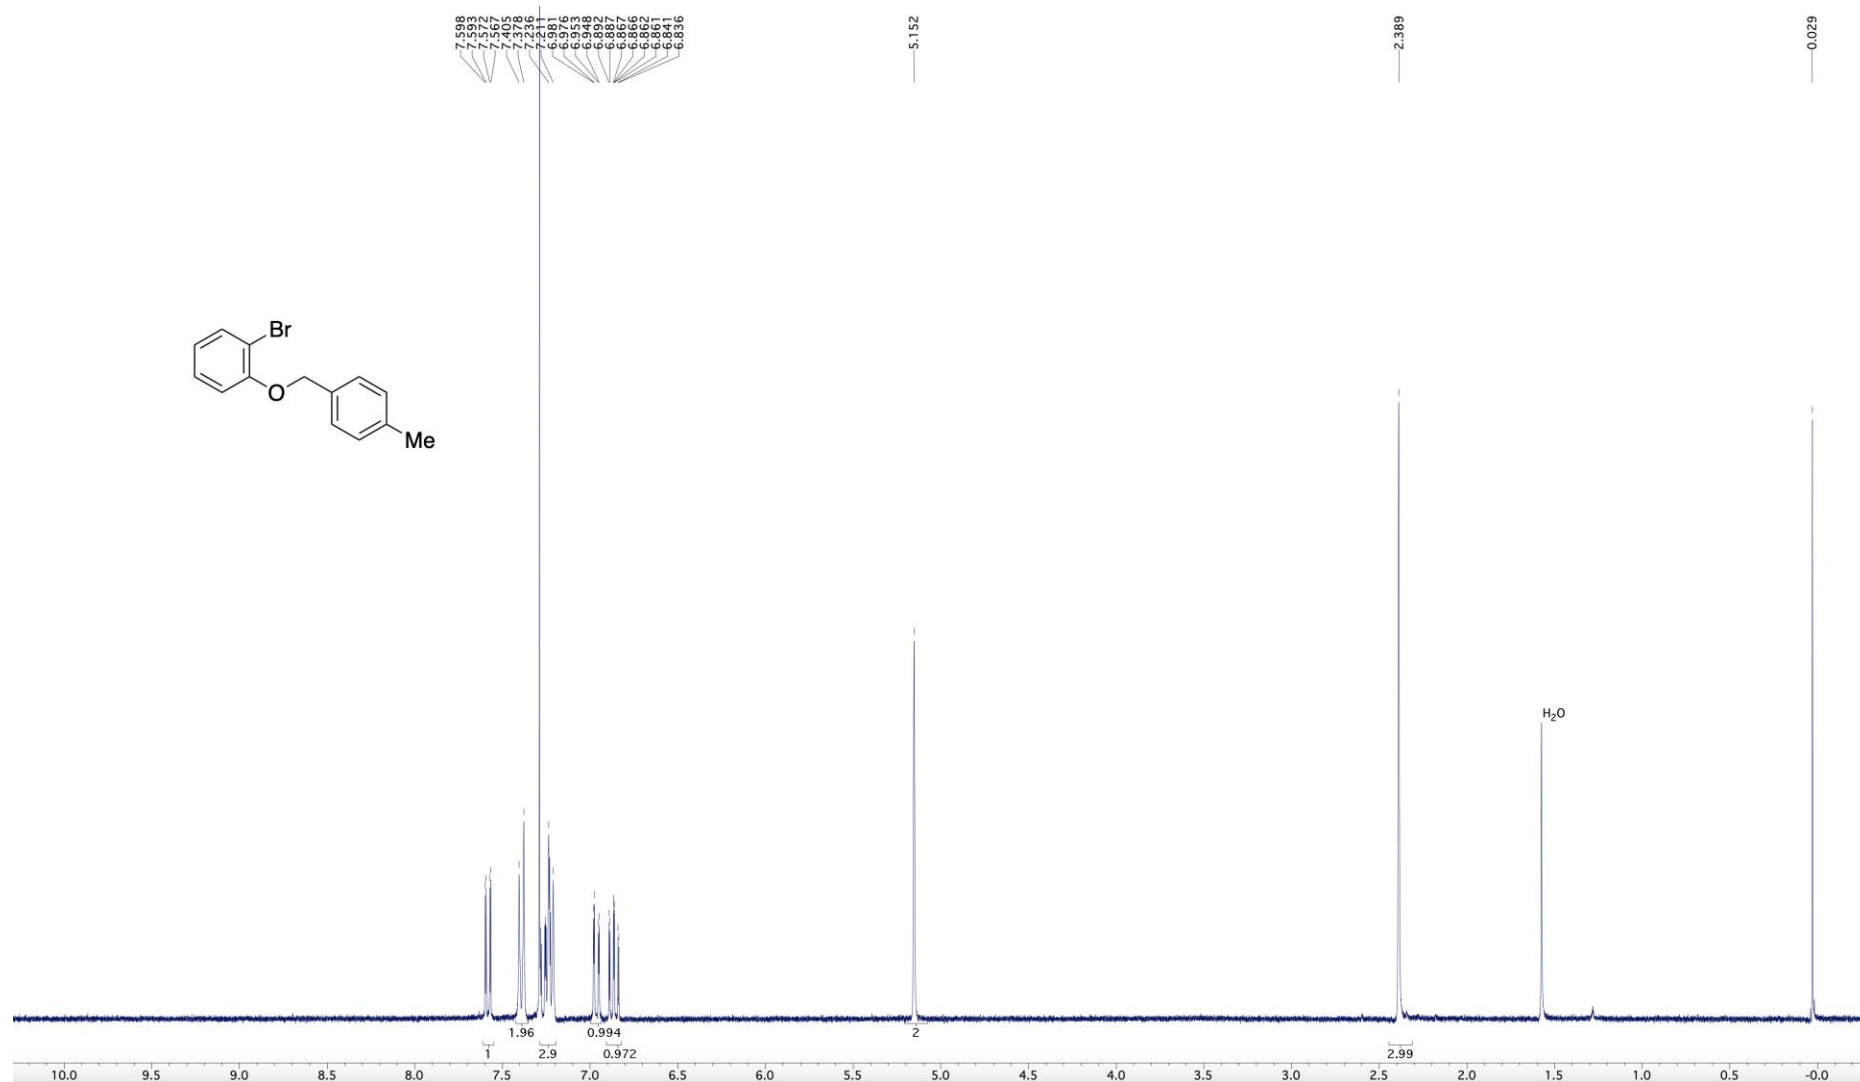

Figure S19. 125 MHz DEPTQ  $^{13}\text{C}$  NMR spectrum of **18b**

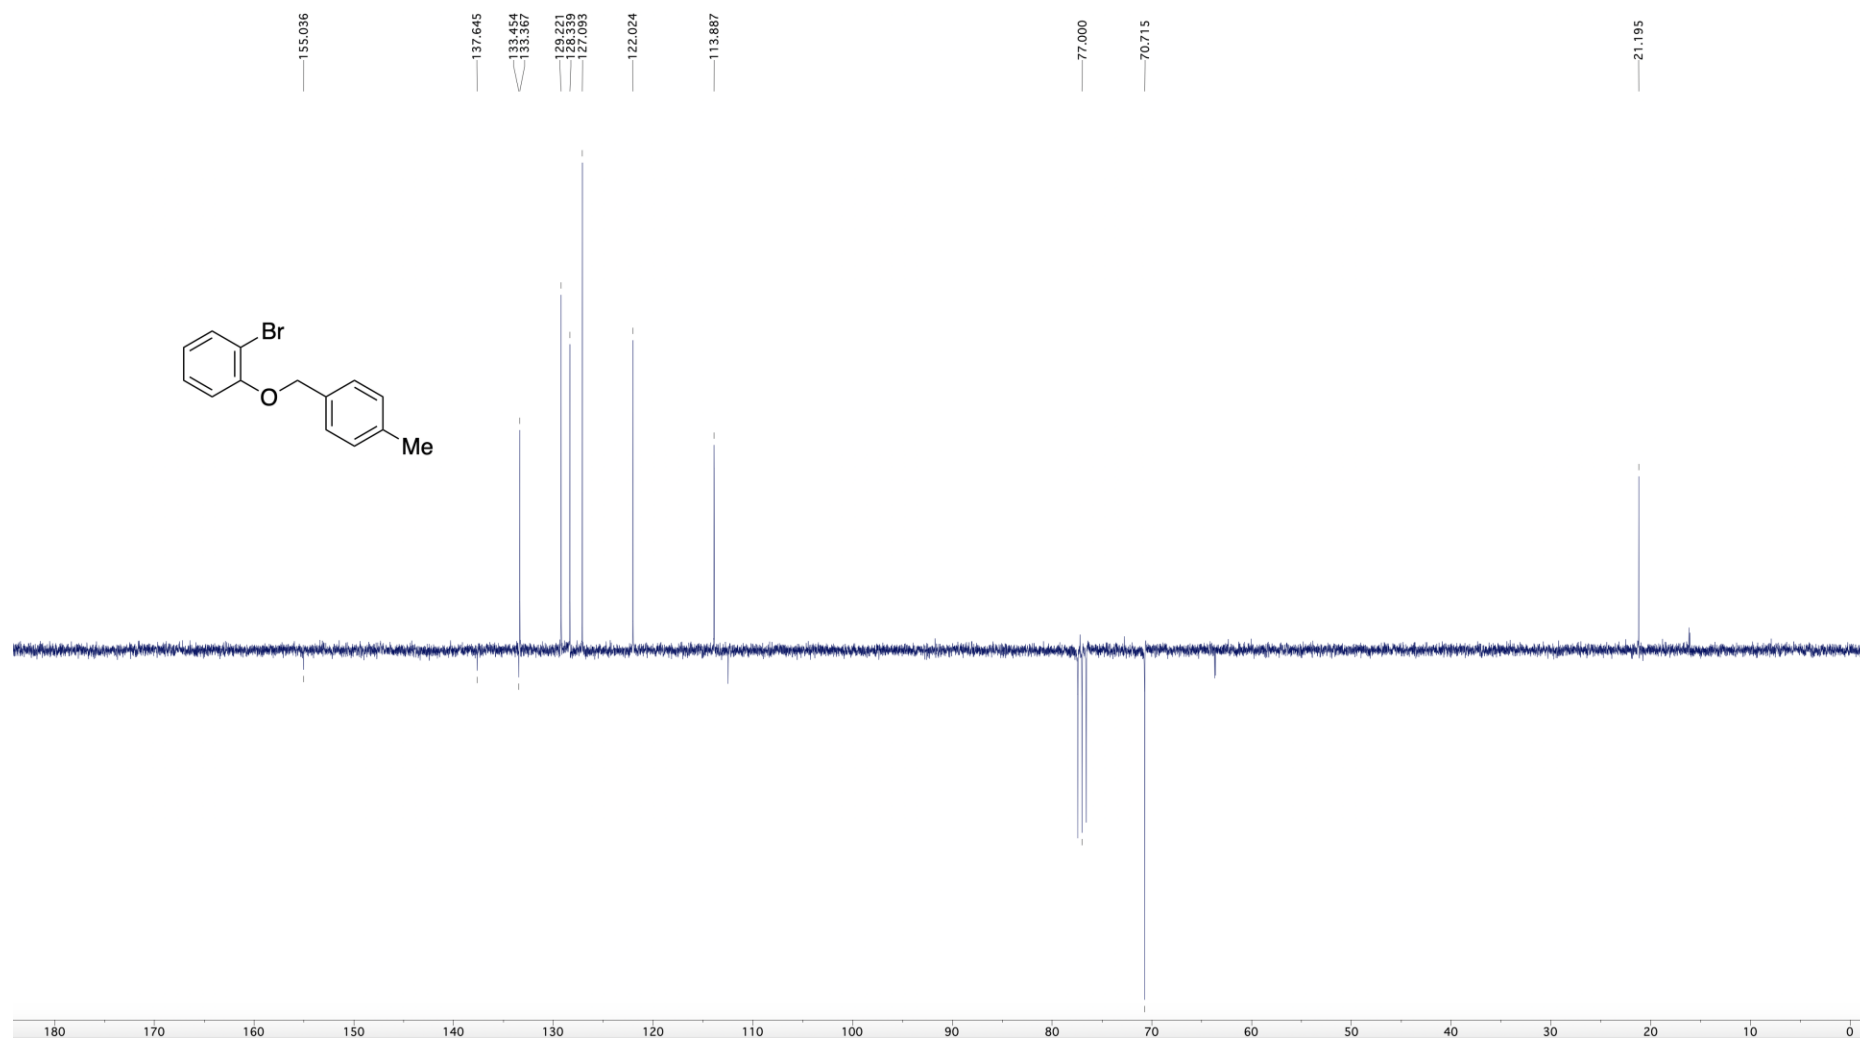

Figure S20. 300 MHz  $^1\text{H}$  NMR spectrum of **18c**

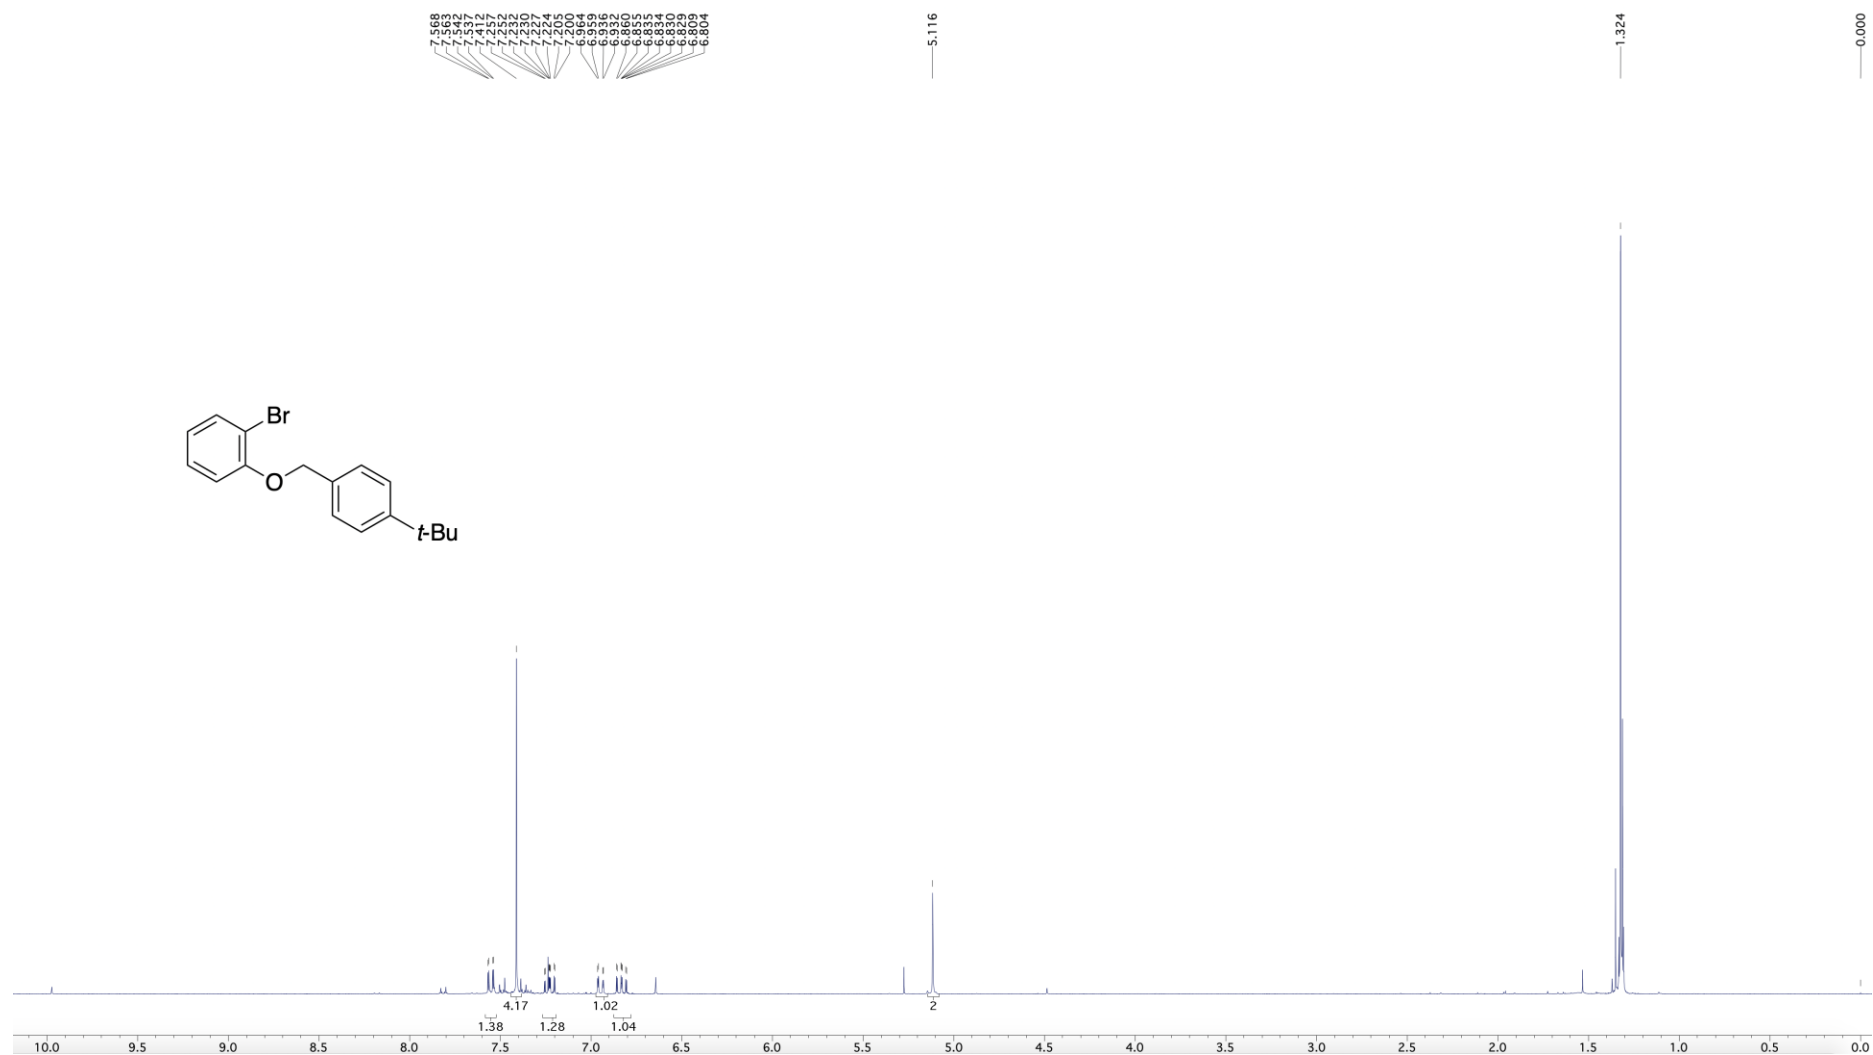

Figure S21. 125 MHz DEPTQ  $^{13}\text{C}$  NMR spectrum of **18c**

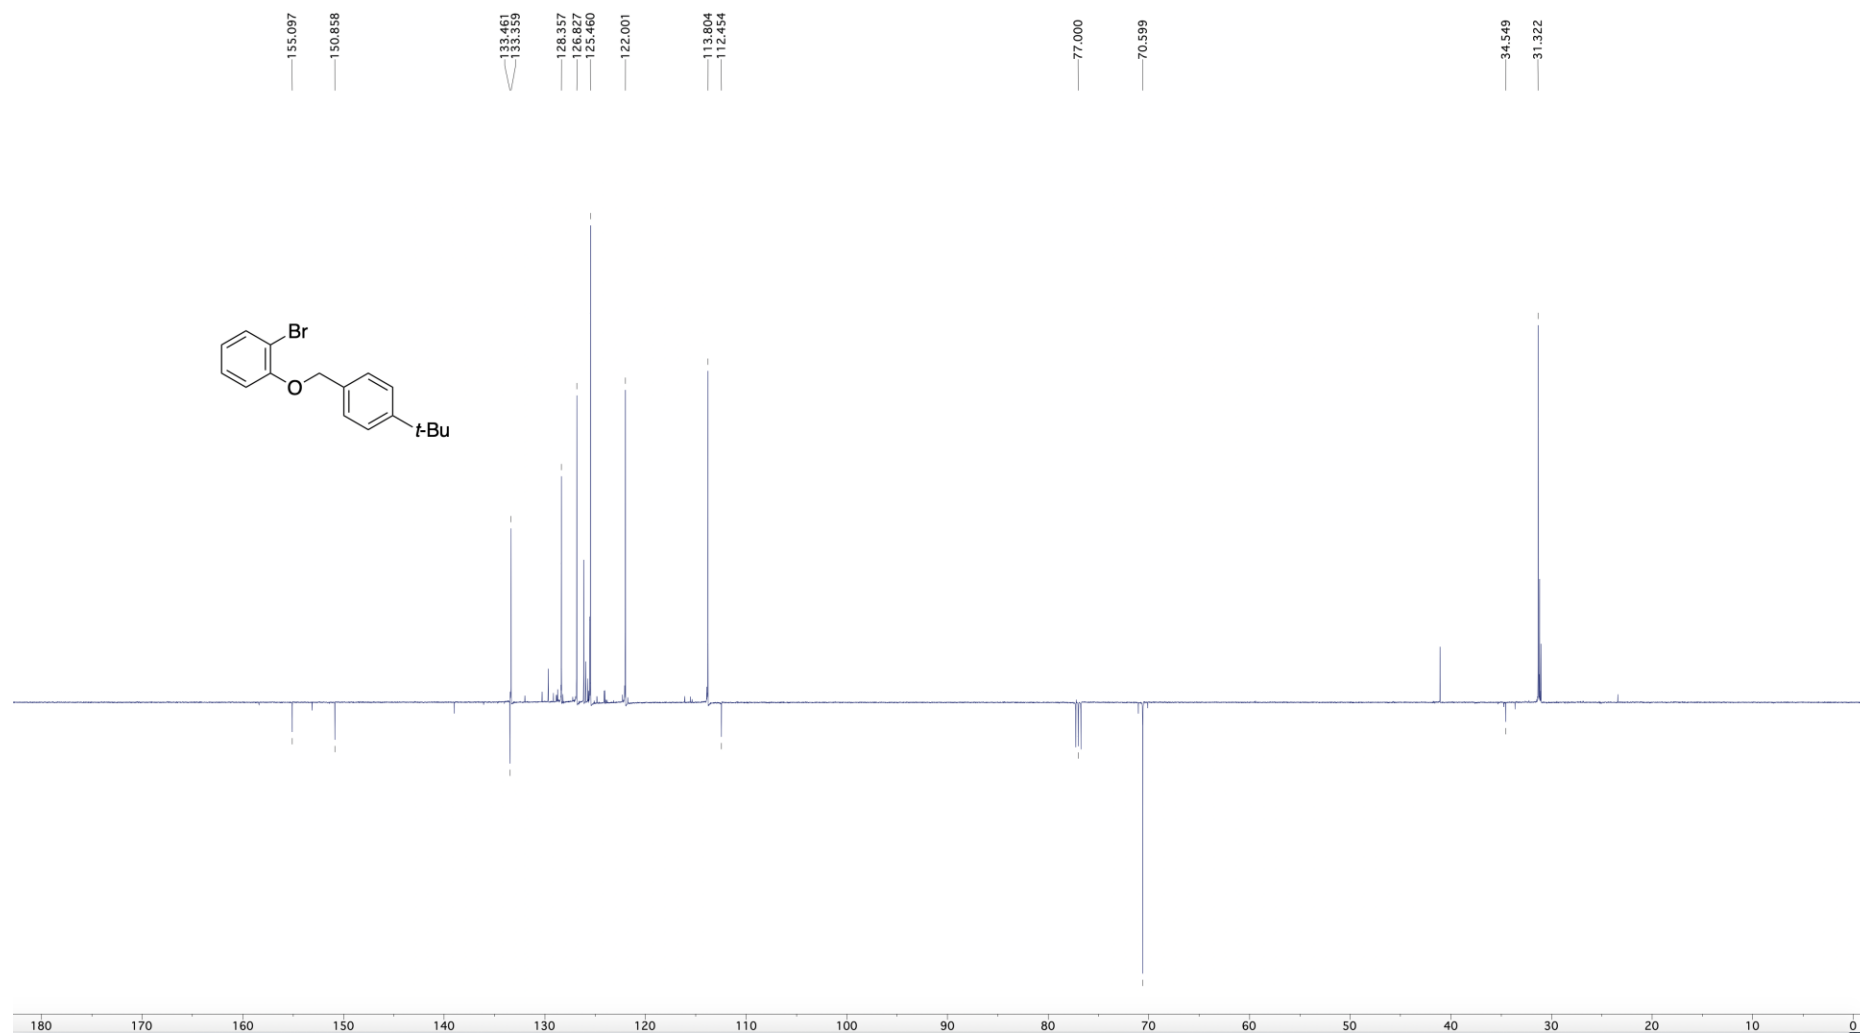

Figure S22. 300 MHz  $^1\text{H}$  NMR spectrum of **18d**

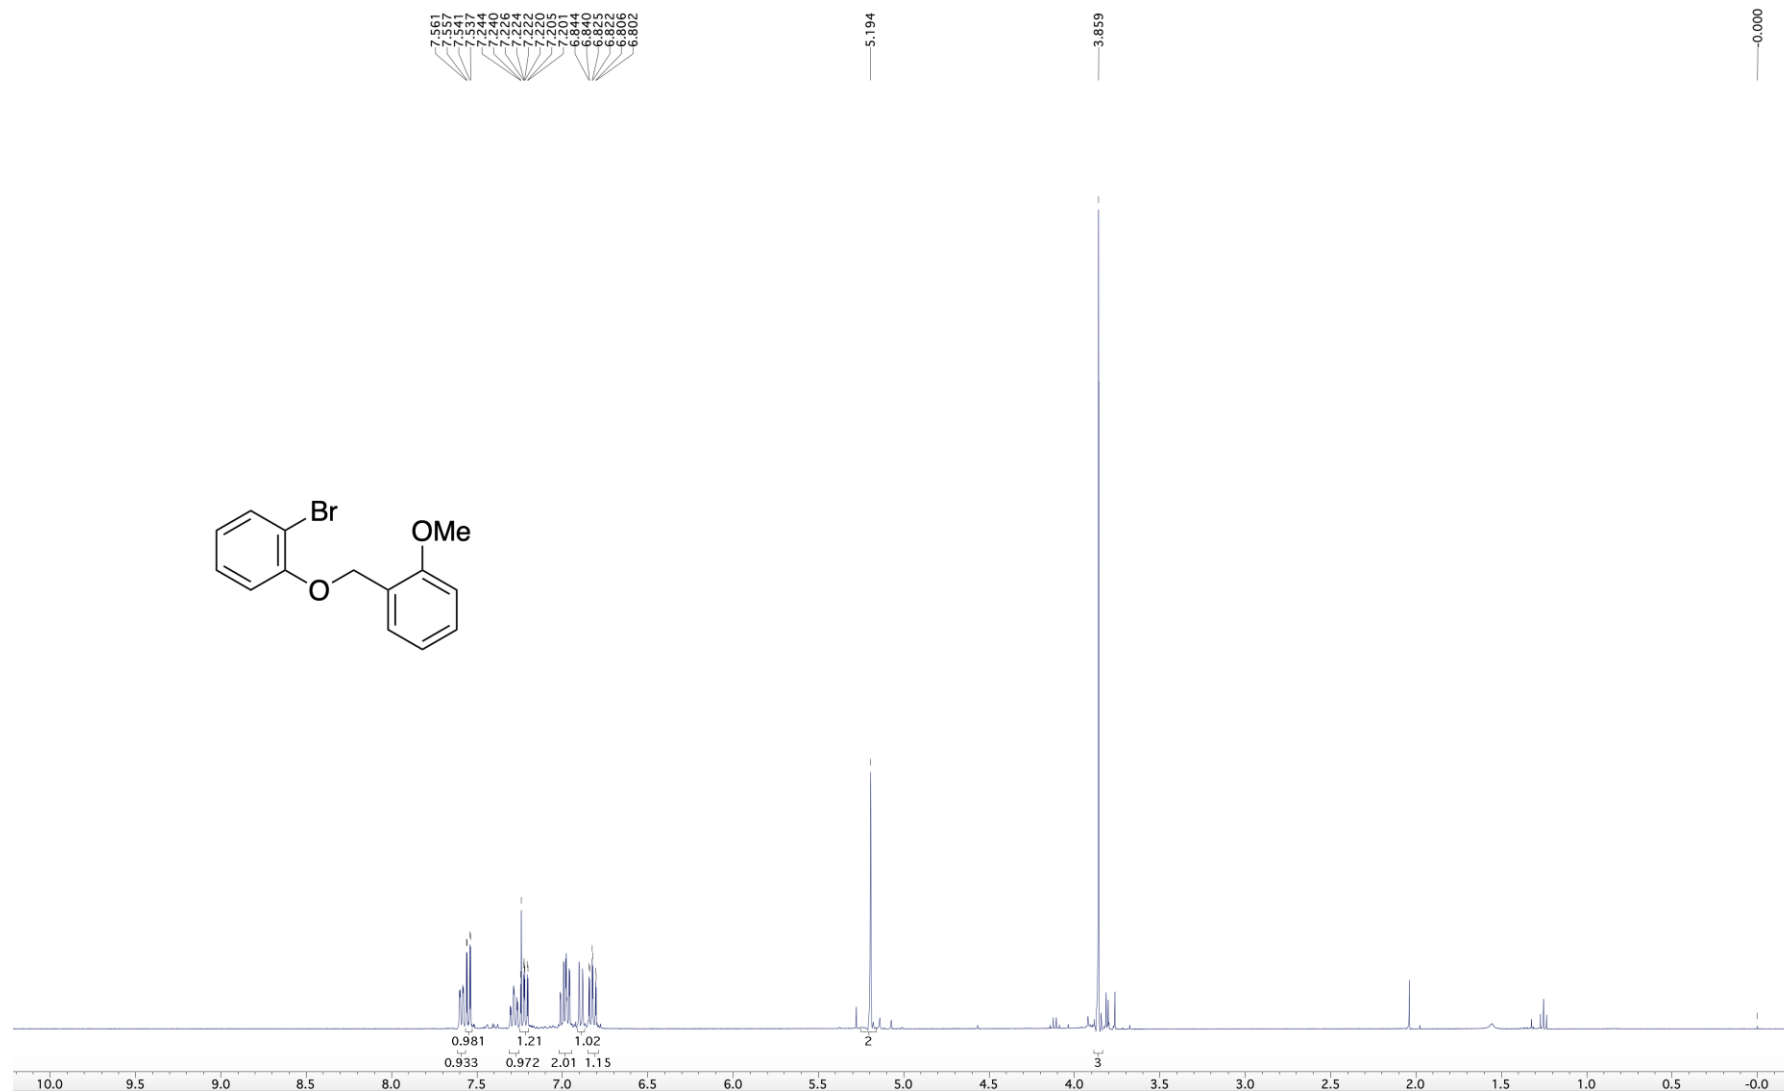

Figure S23. 75 MHz DEPTQ  $^{13}\text{C}$  NMR spectrum of **18d**

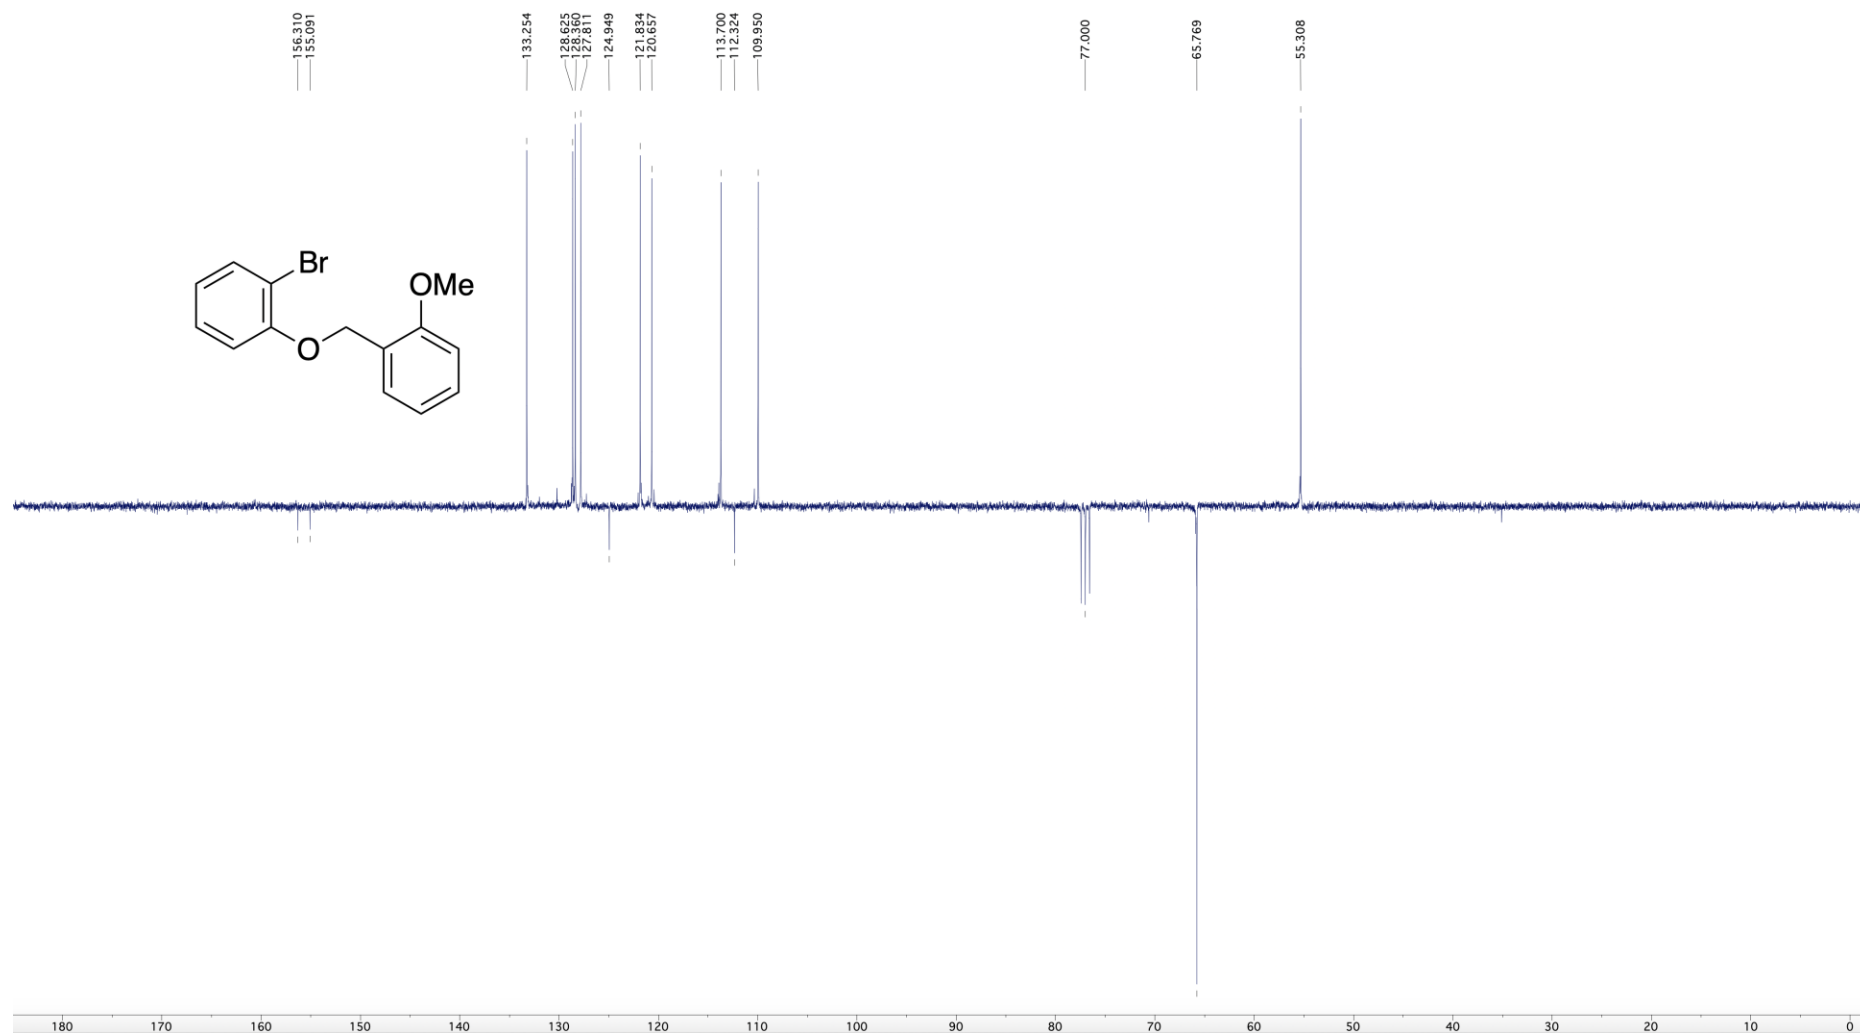

Figure S24. 300 MHz  $^1\text{H}$  NMR spectrum of **18e**

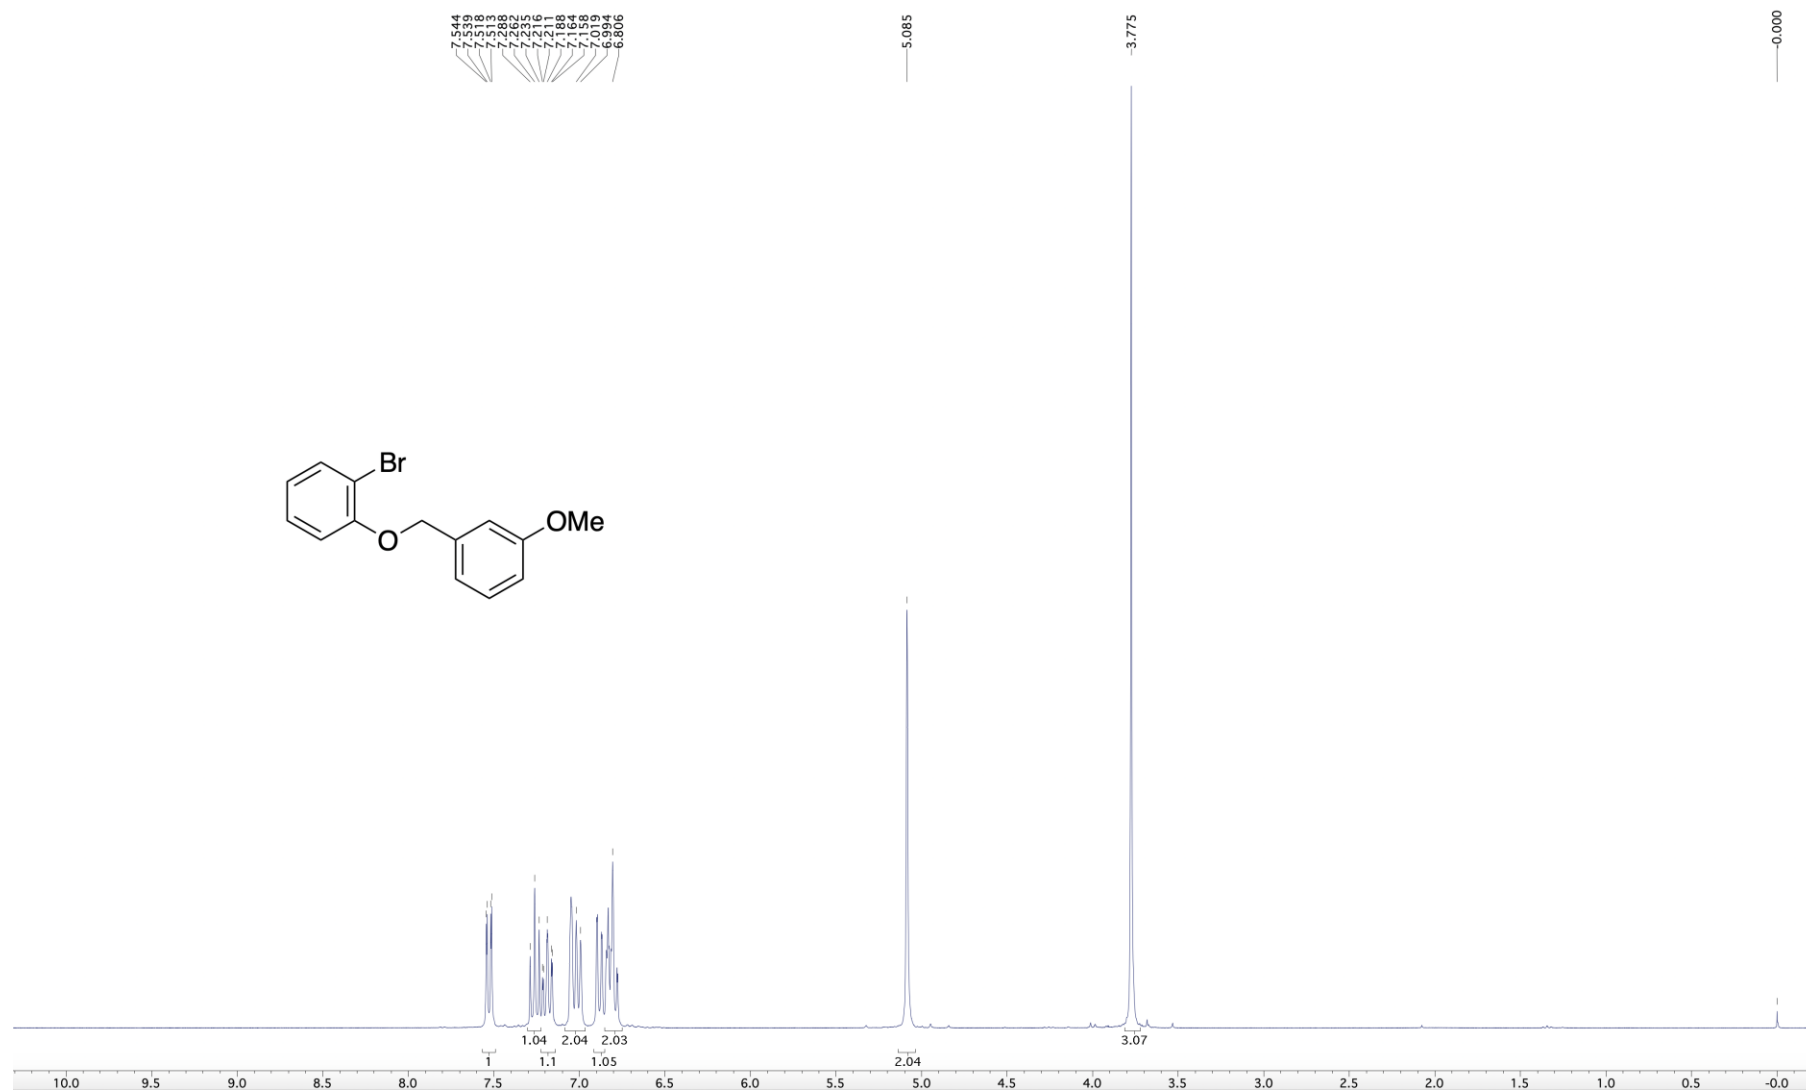

Figure S25. 75 MHz DEPTQ  $^{13}\text{C}$  NMR spectrum of **18e**

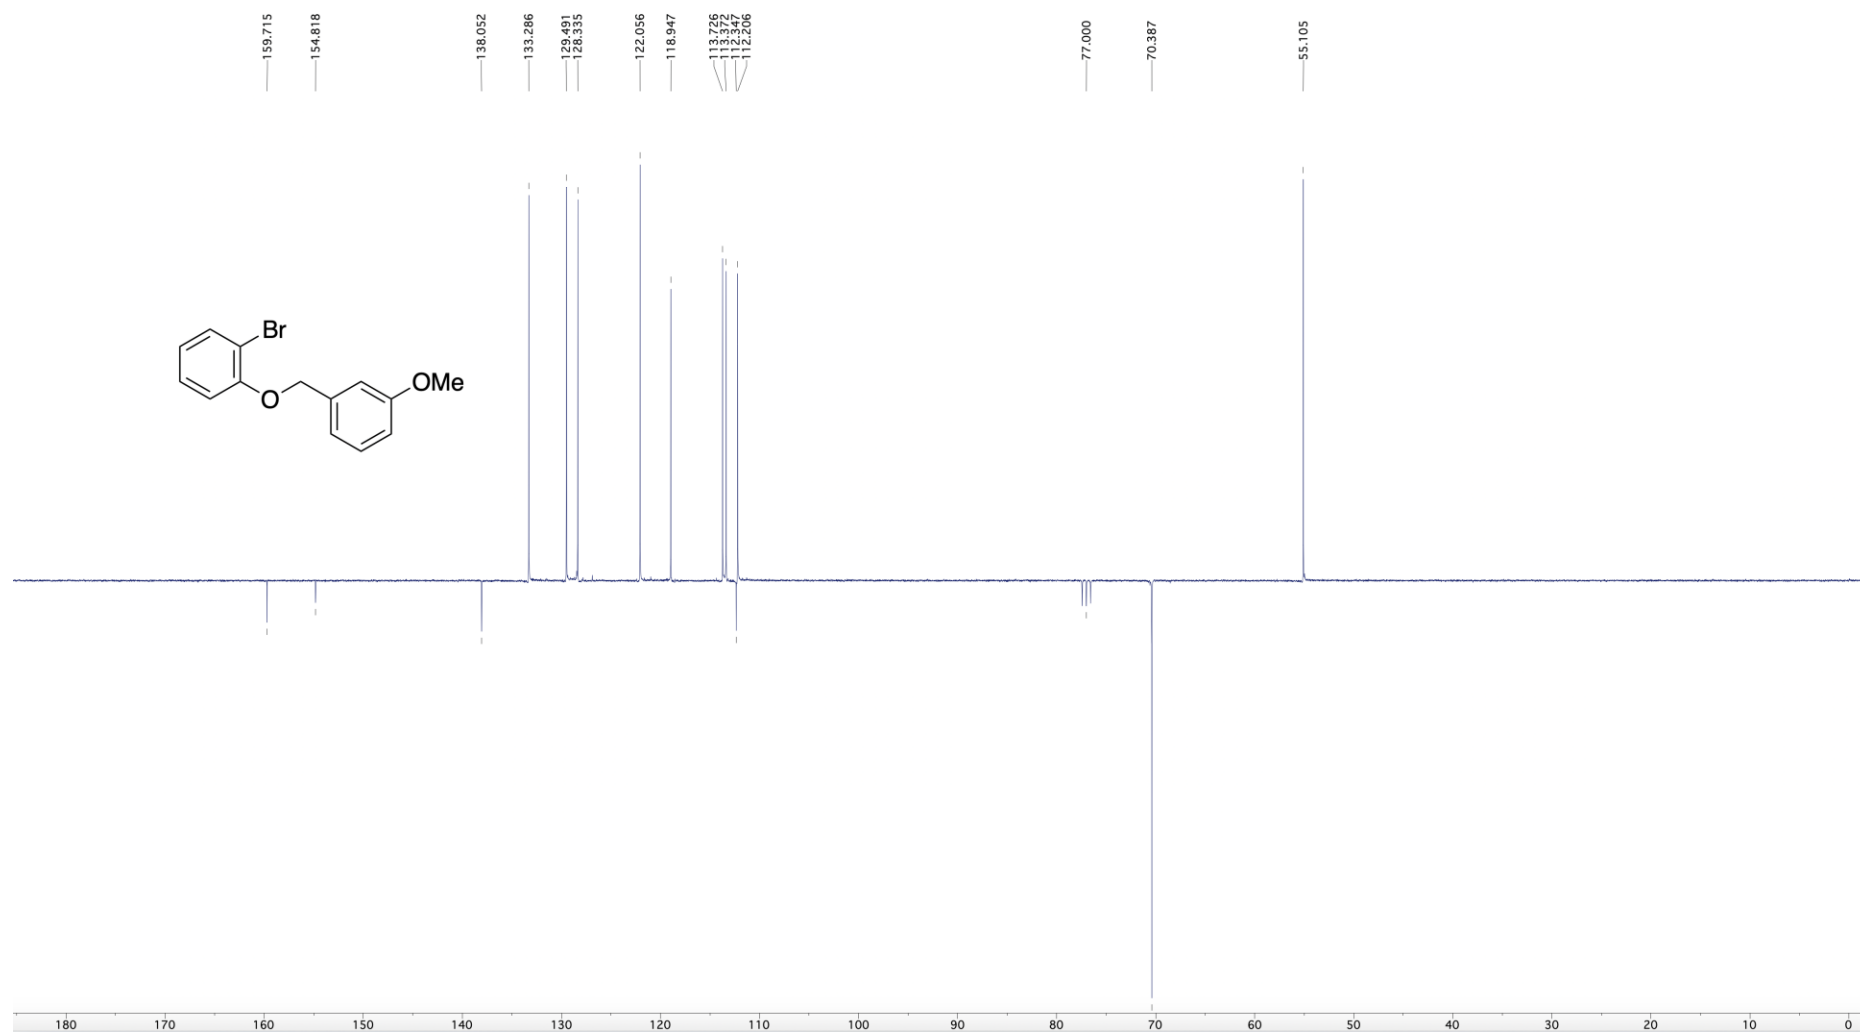



Figure S26. 300 MHz  $^1\text{H}$  NMR spectrum of **18f**

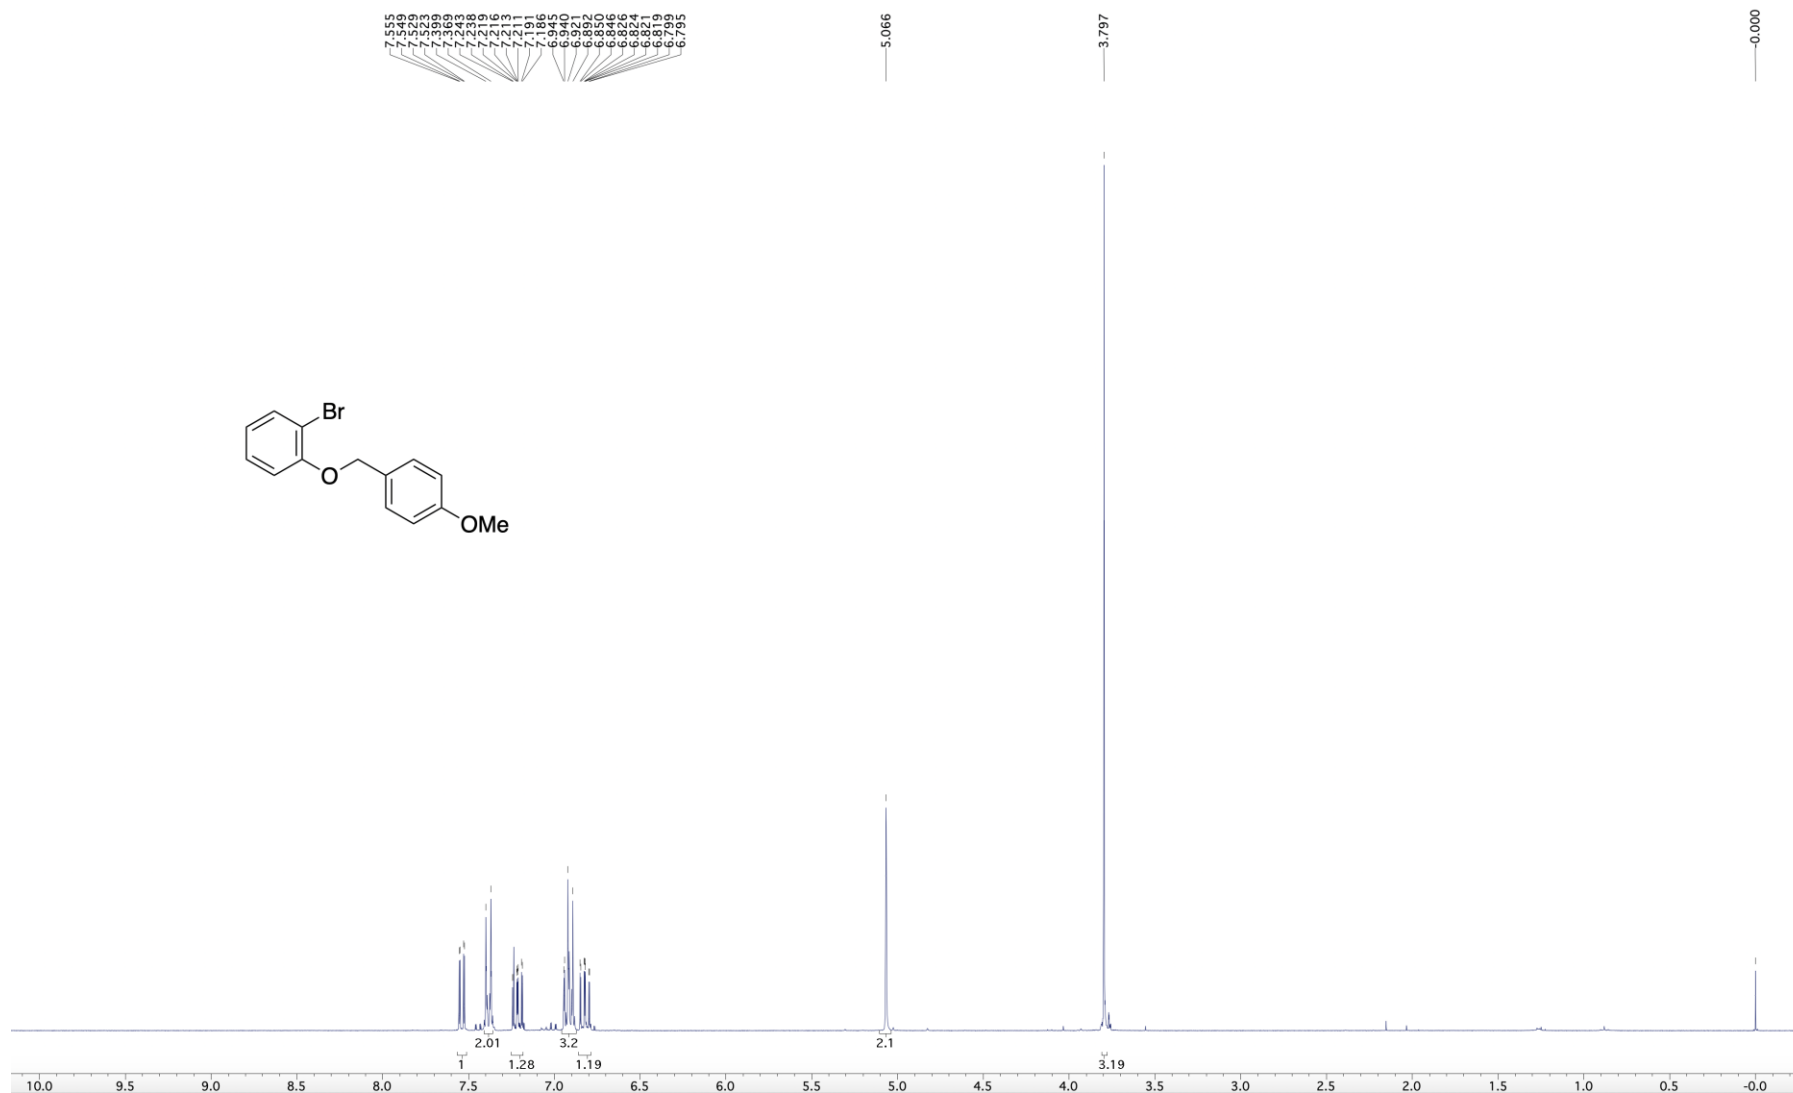

Figure S27. 750 MHz DEPTQ  $^{13}\text{C}$  NMR spectrum of **18f**

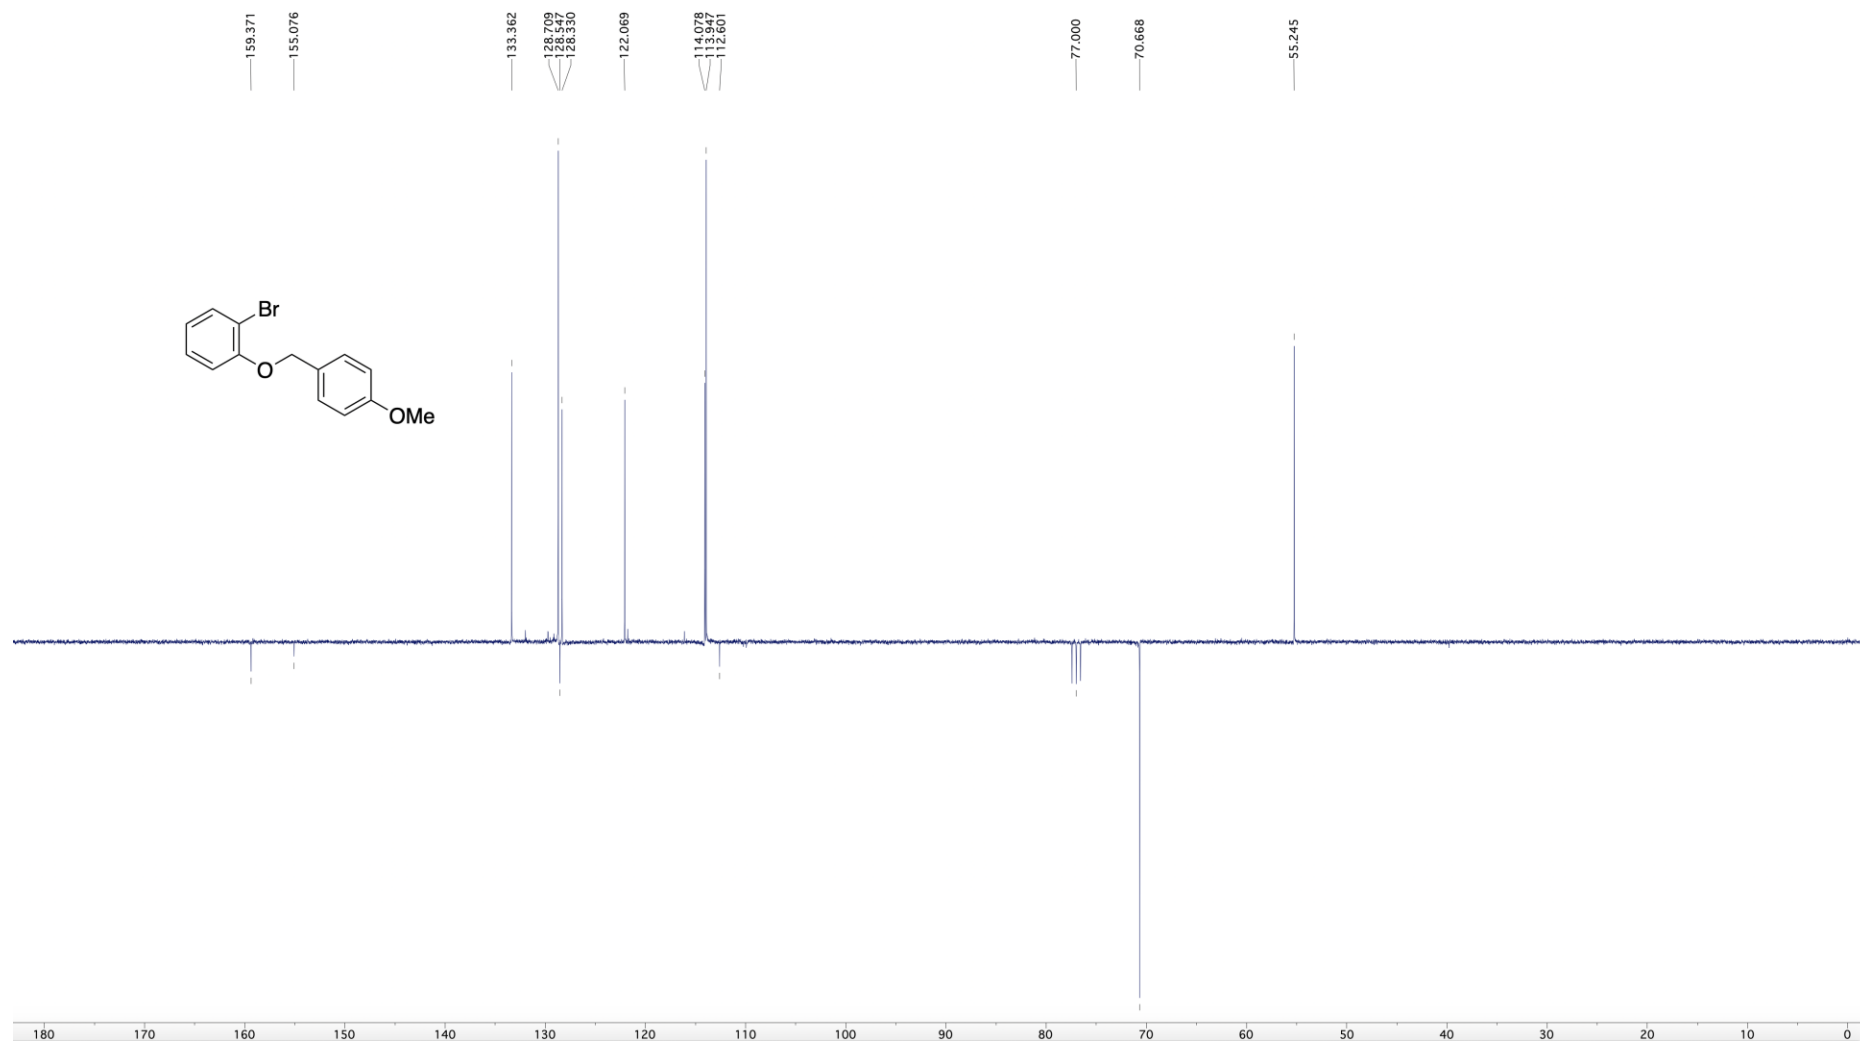

Figure S28. 300 MHz  $^1\text{H}$  NMR spectrum of **18g**

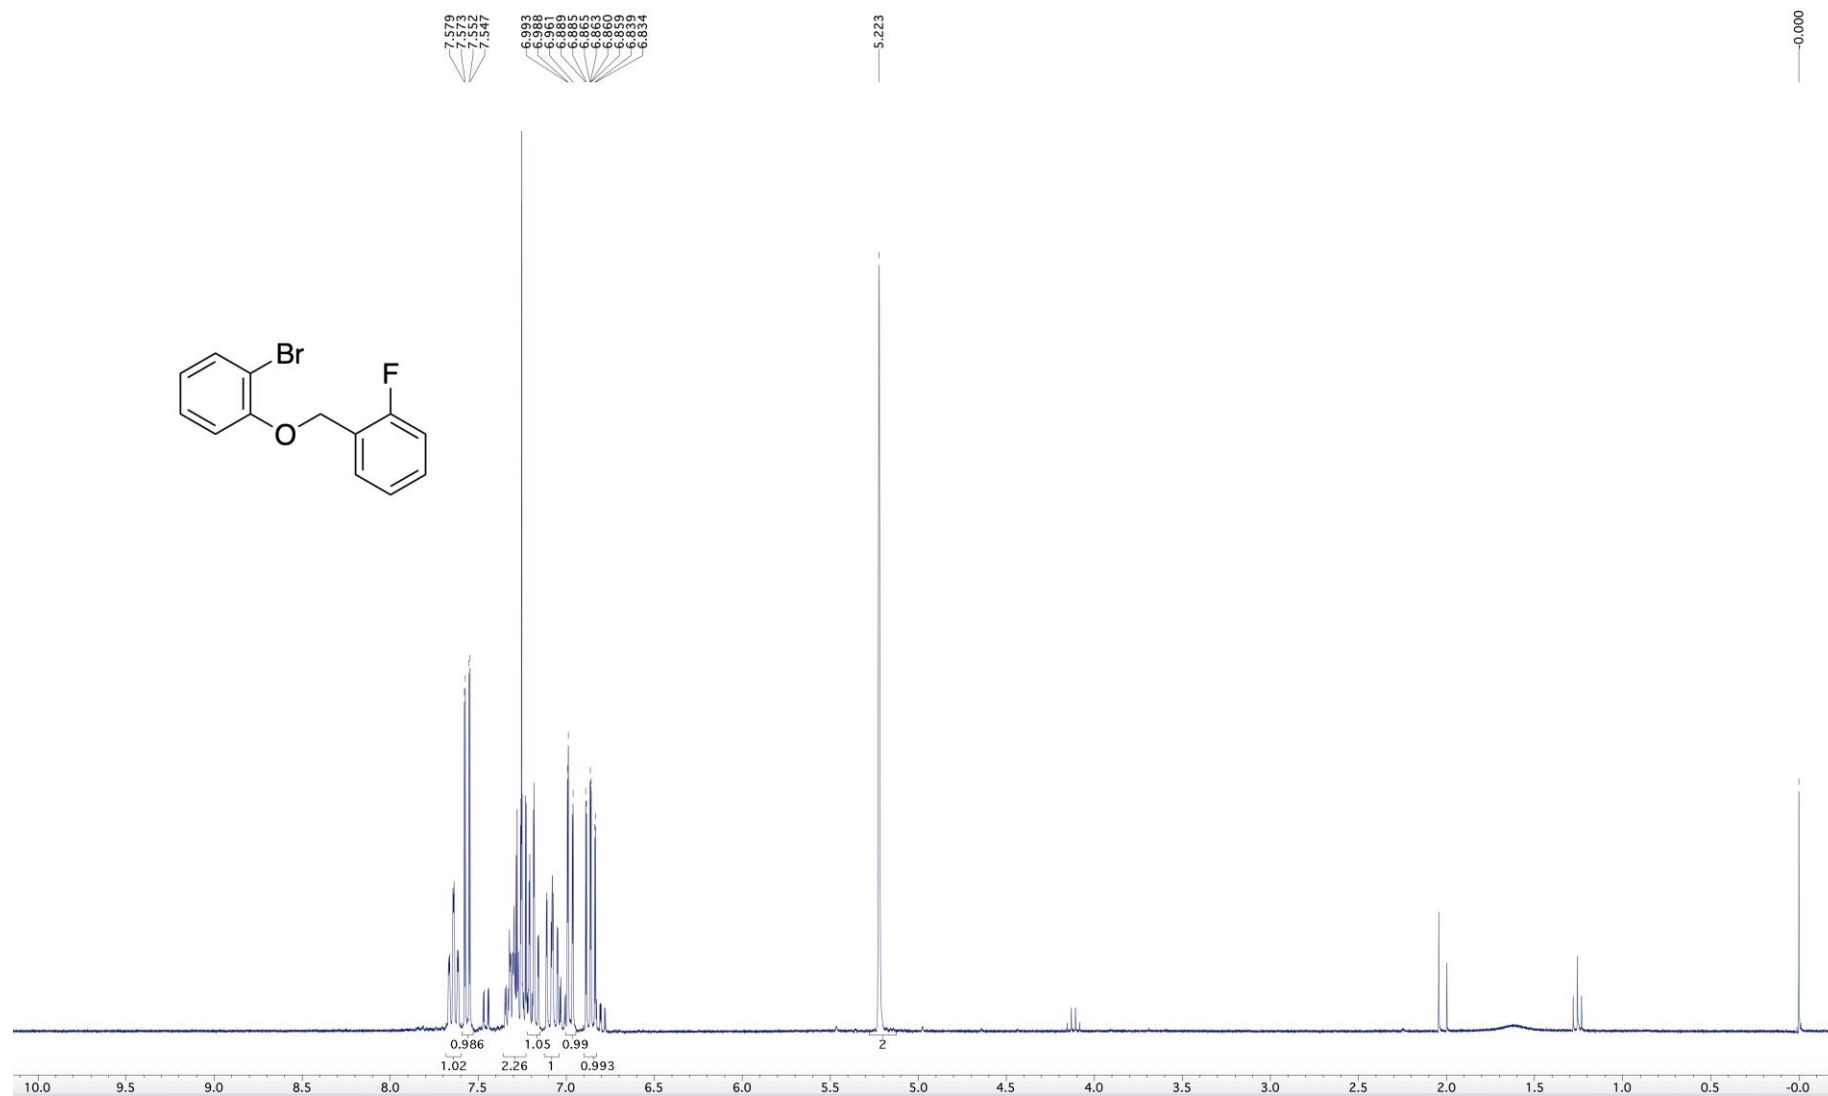

Figure S29. 376 MHz  $^{19}\text{F}$  NMR spectrum of **18g**

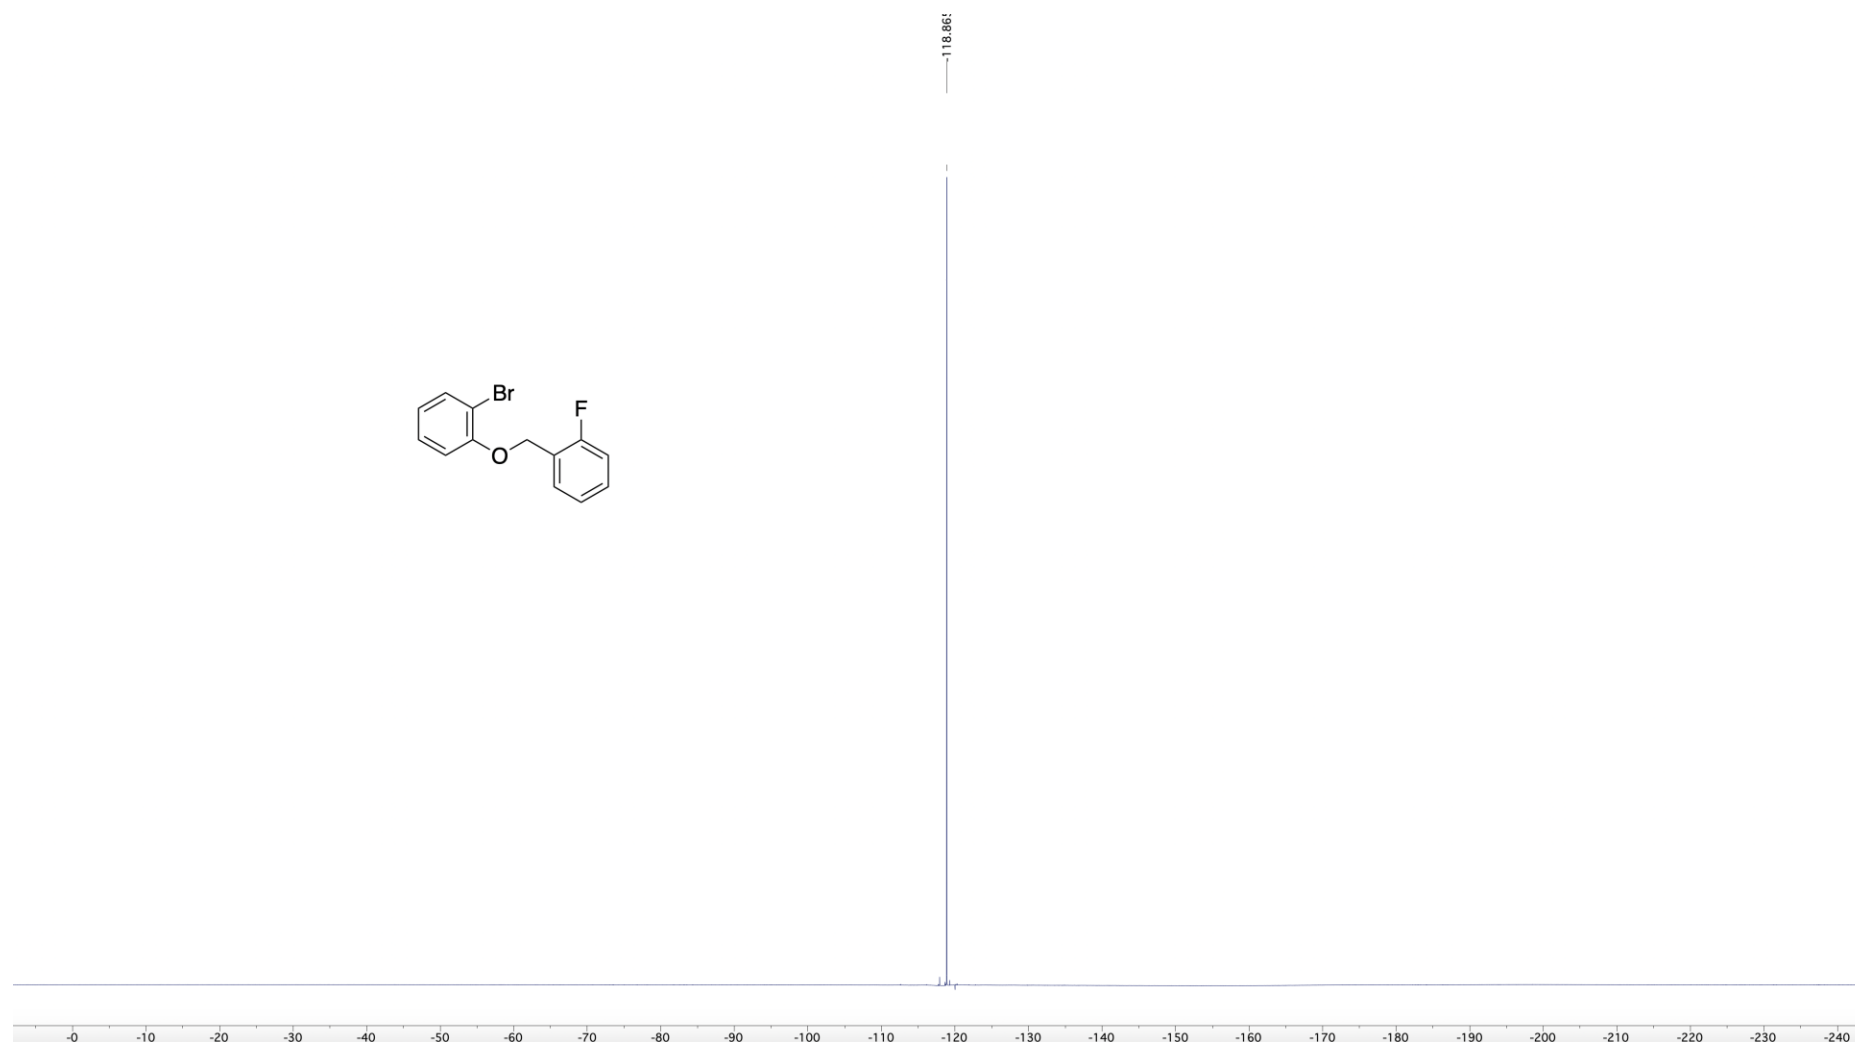

Figure S30. 100 MHz DEPTQ  $^{13}\text{C}$  NMR spectrum of **18g**

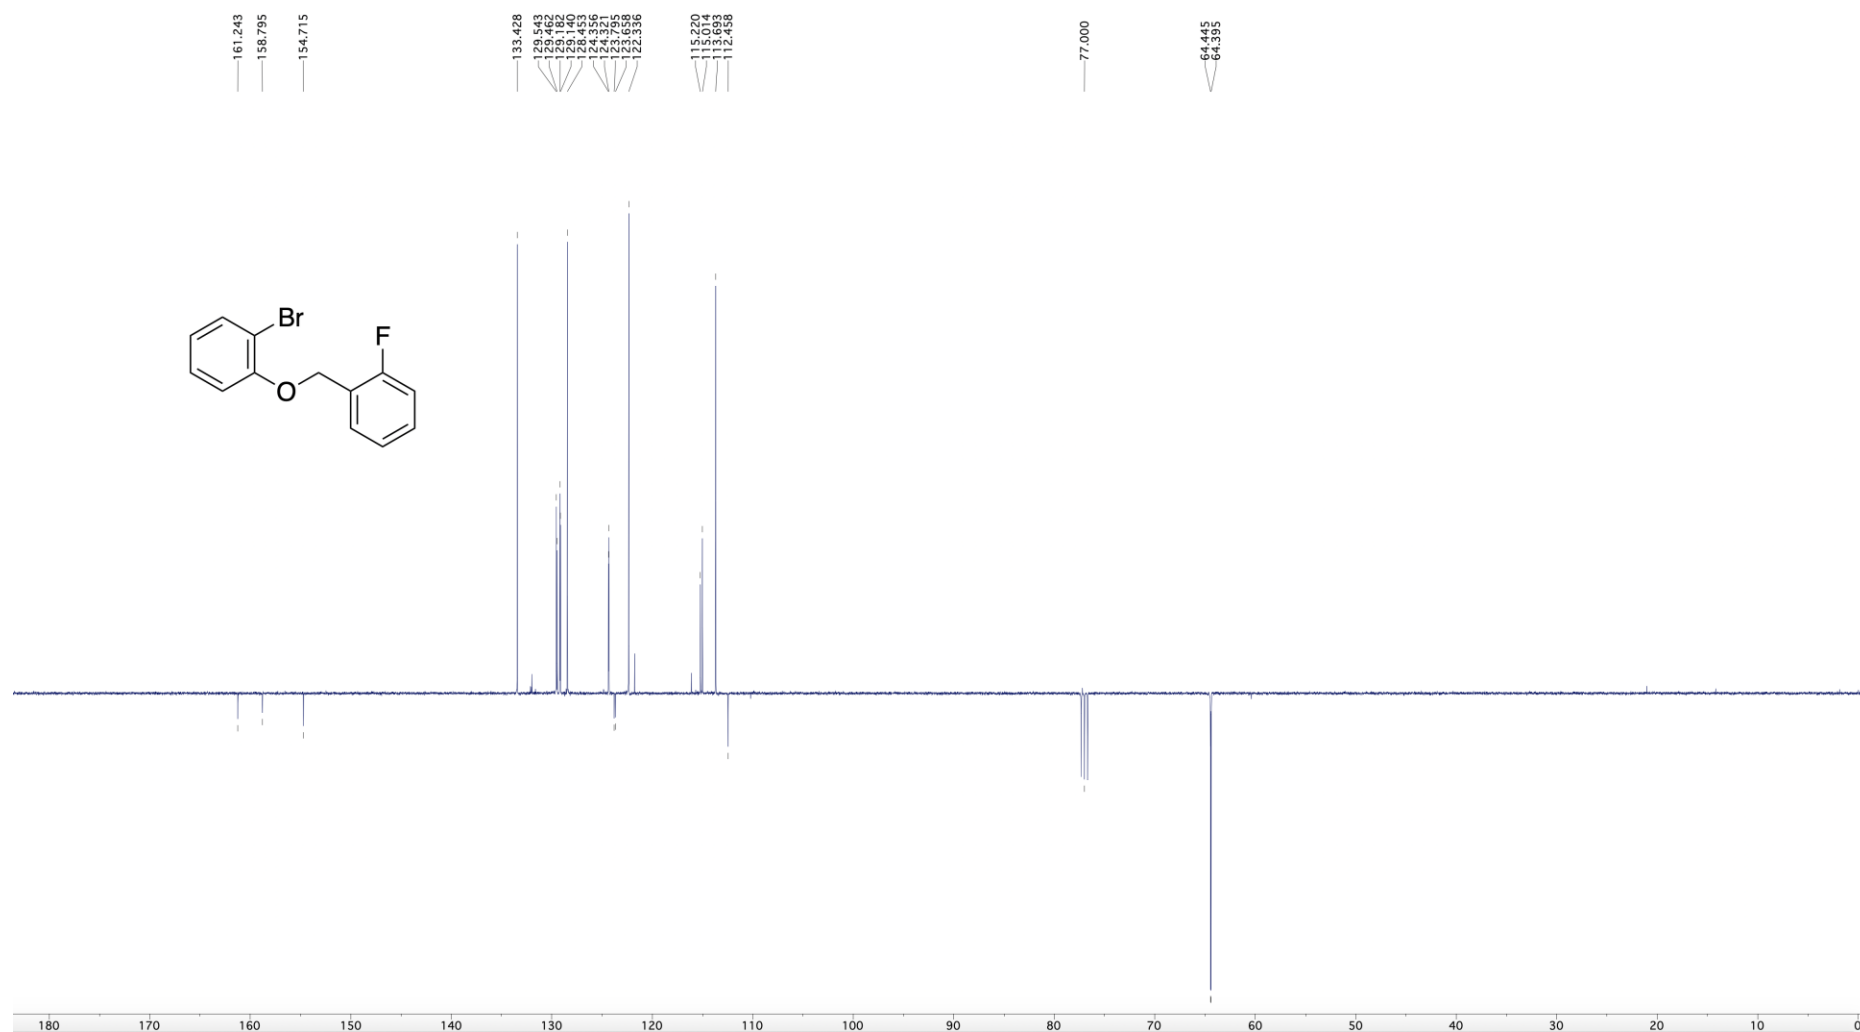

Figure S31. 300 MHz  $^1\text{H}$  NMR spectrum of **18h**

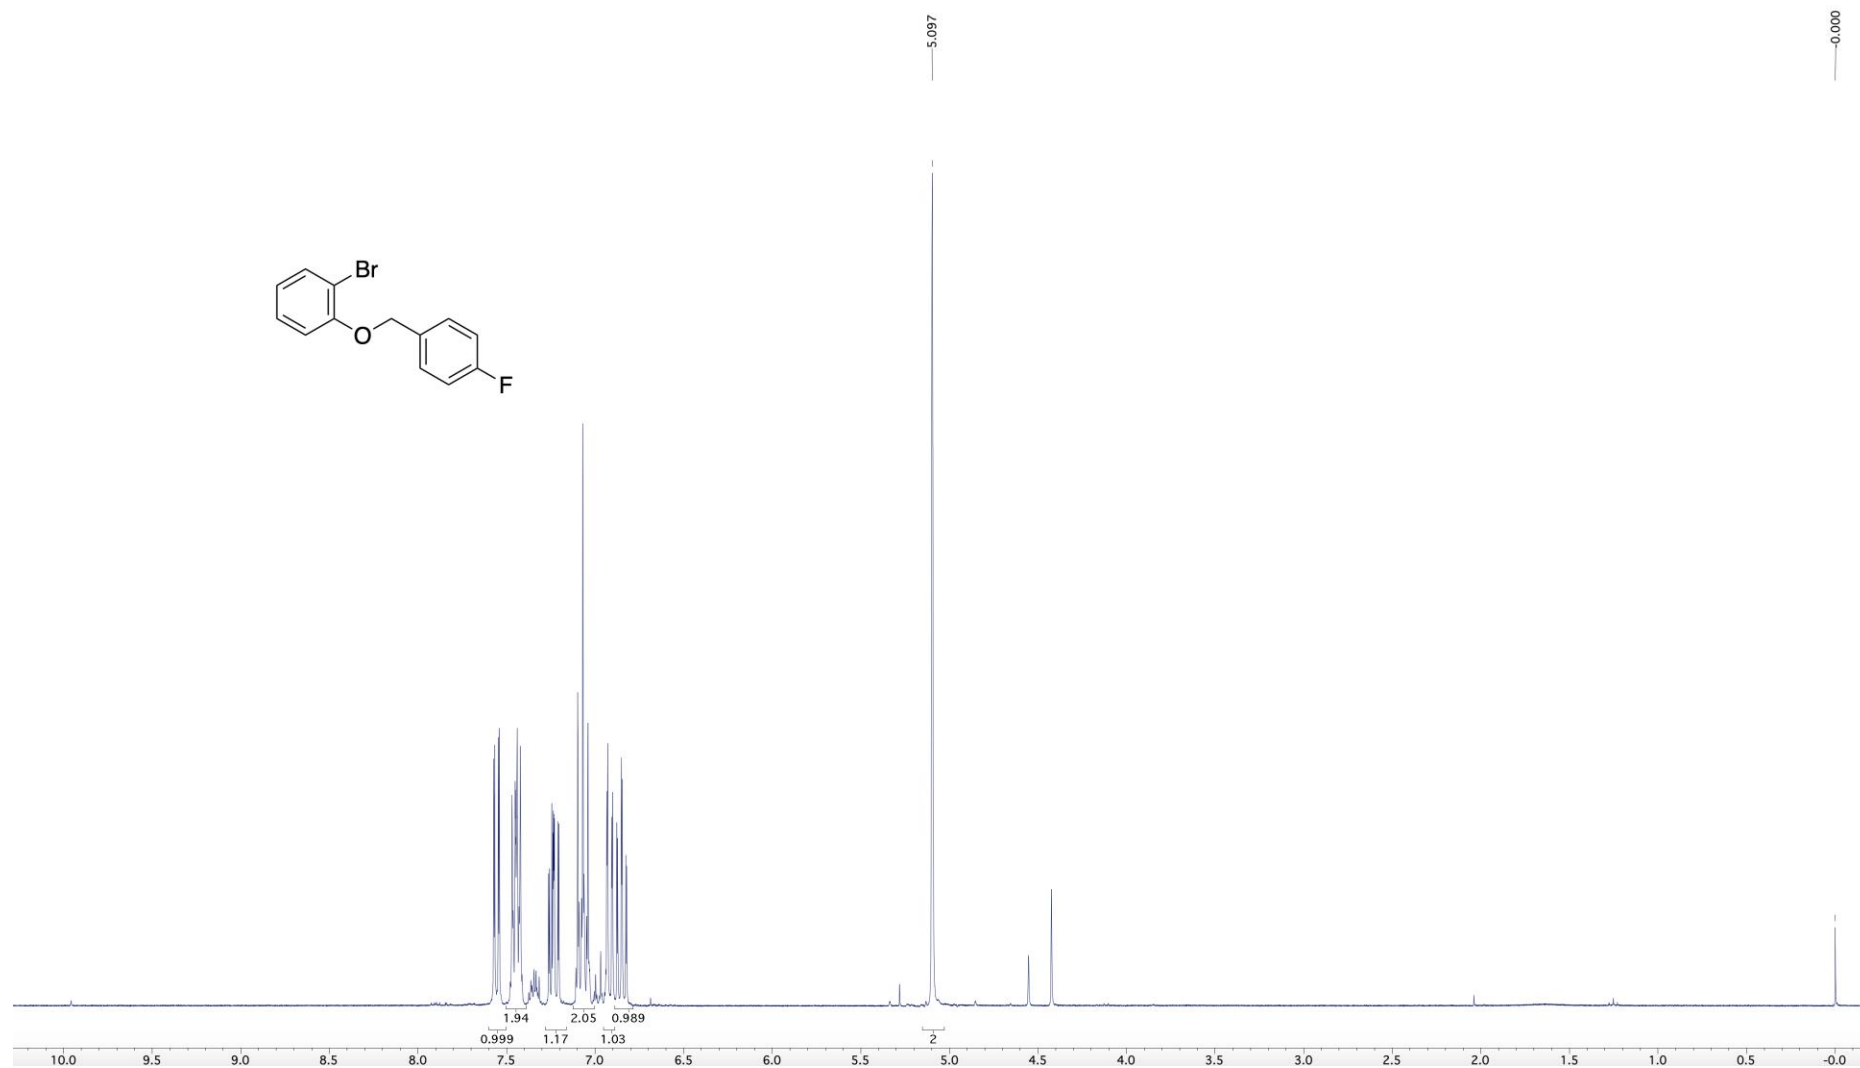

Figure S32. 376 MHz  $^{19}\text{F}$  NMR spectrum of **18h**

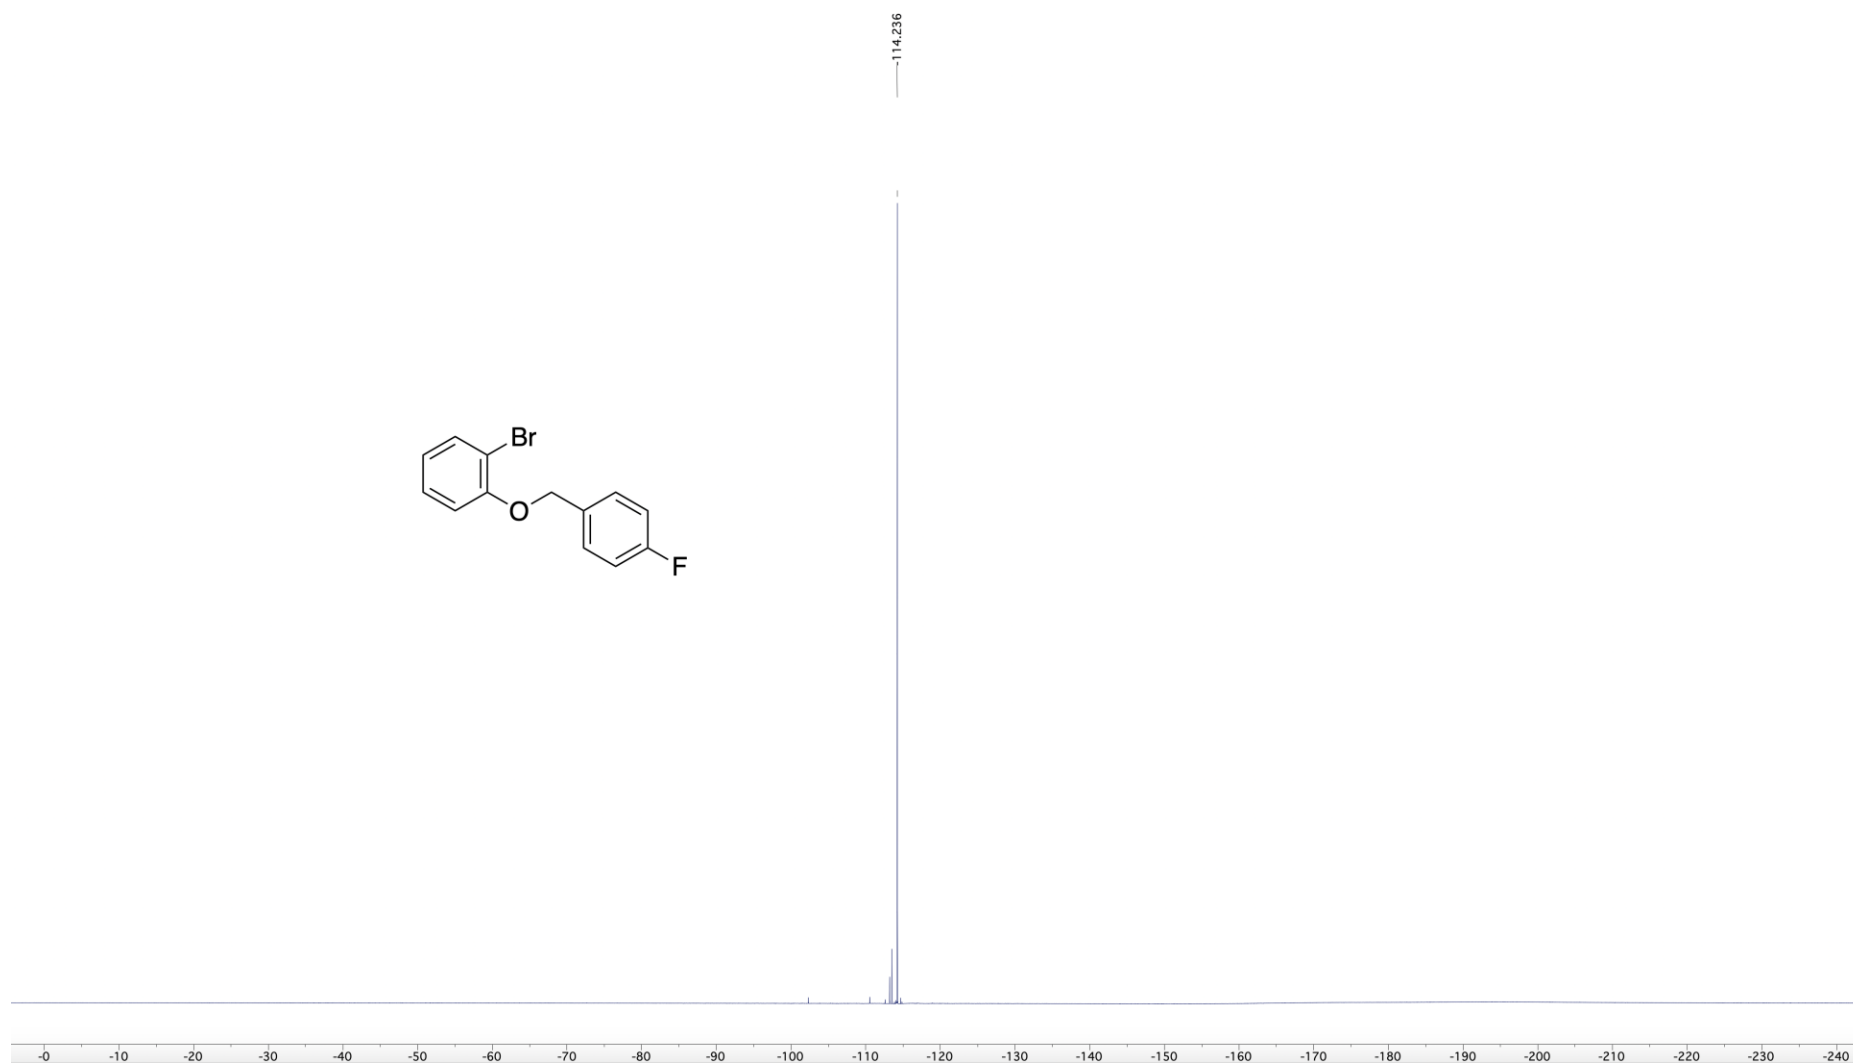

Figure S33. 75 MHz DEPTQ  $^{13}\text{C}$  NMR spectrum of **18h**

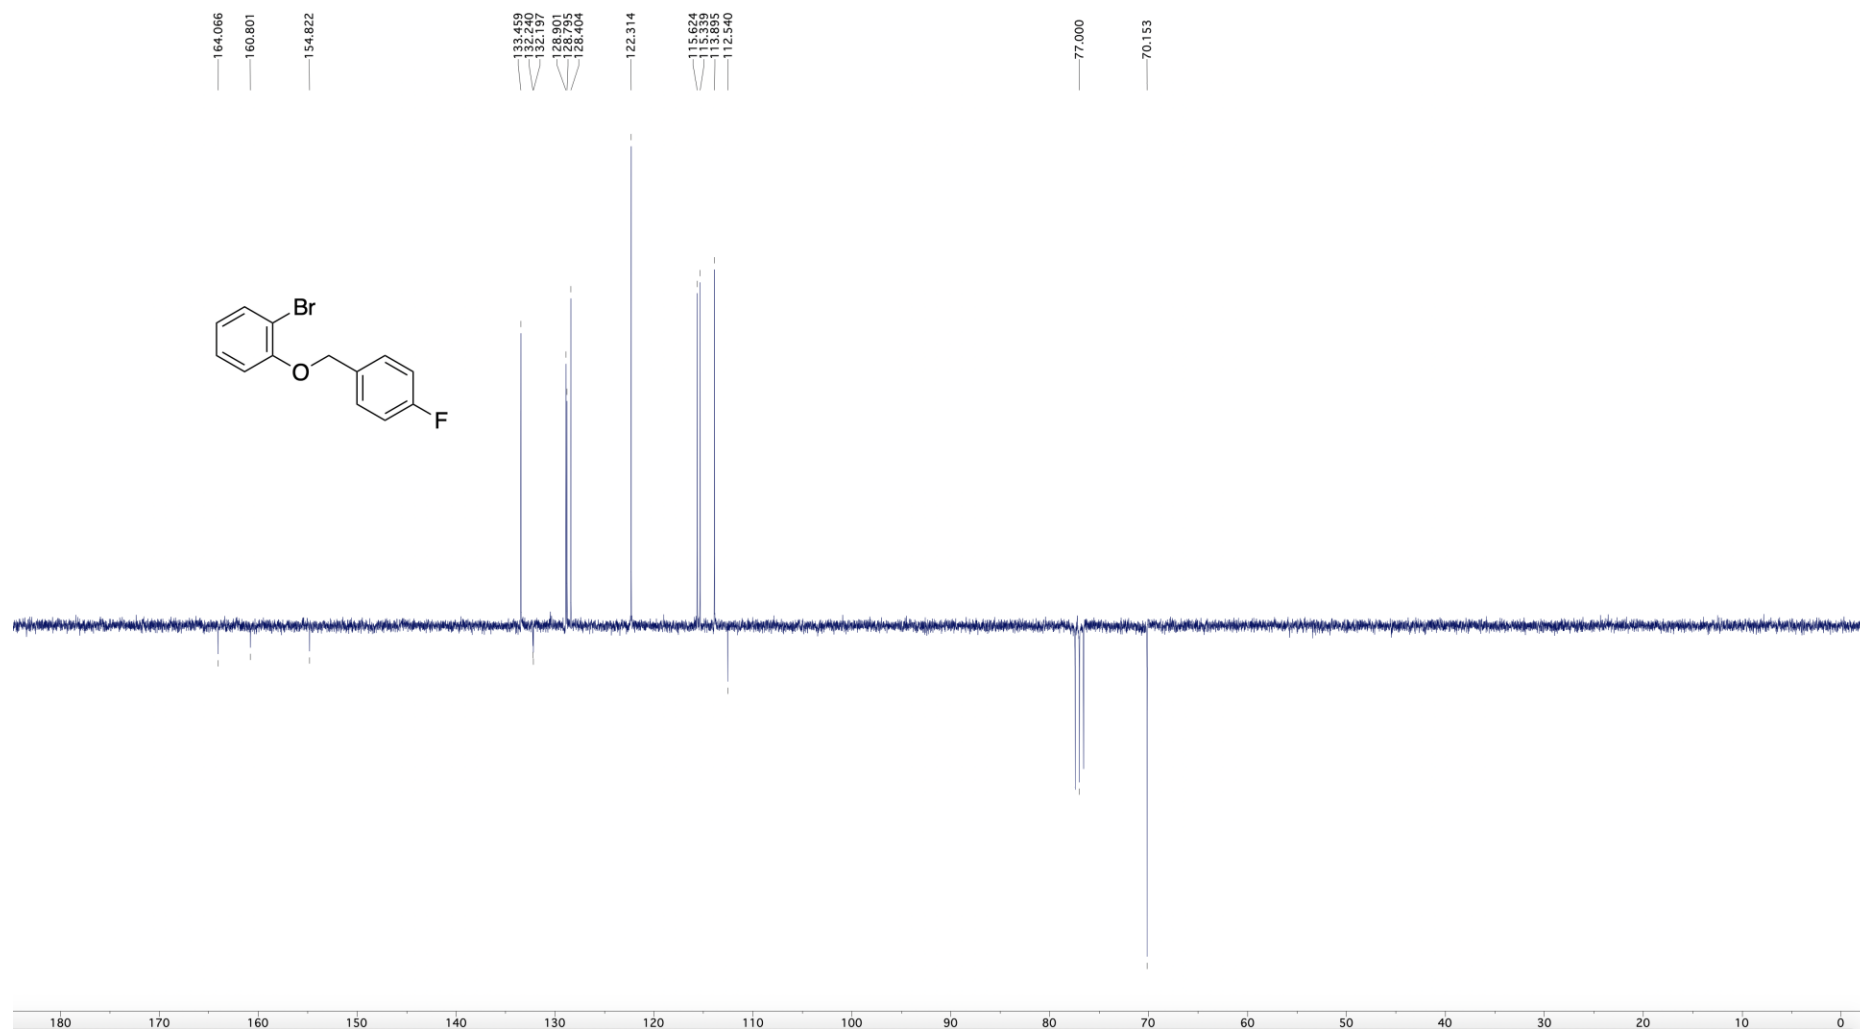



Figure S34. 300 MHz  $^1\text{H}$  NMR spectrum of **18l**

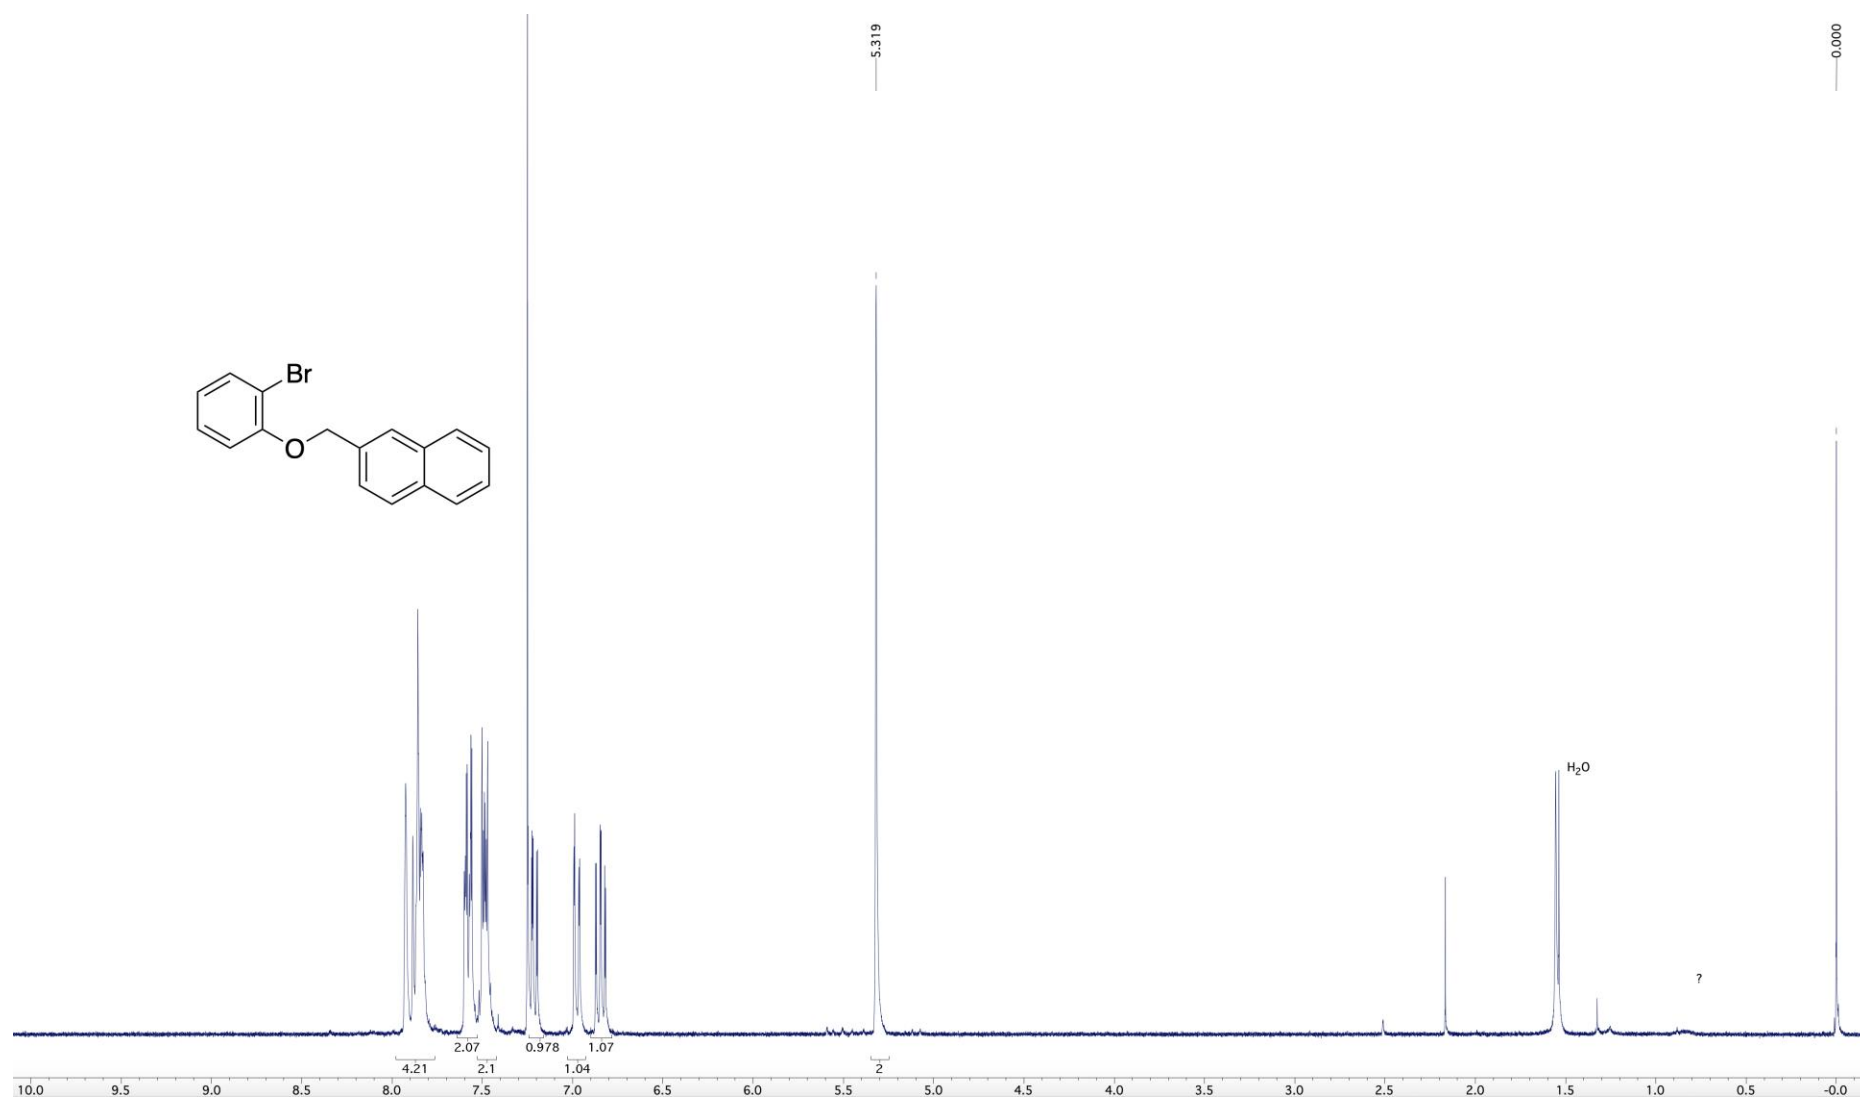

Figure S35. 75 MHz DEPTQ  $^{13}\text{C}$  NMR spectrum of **18l**

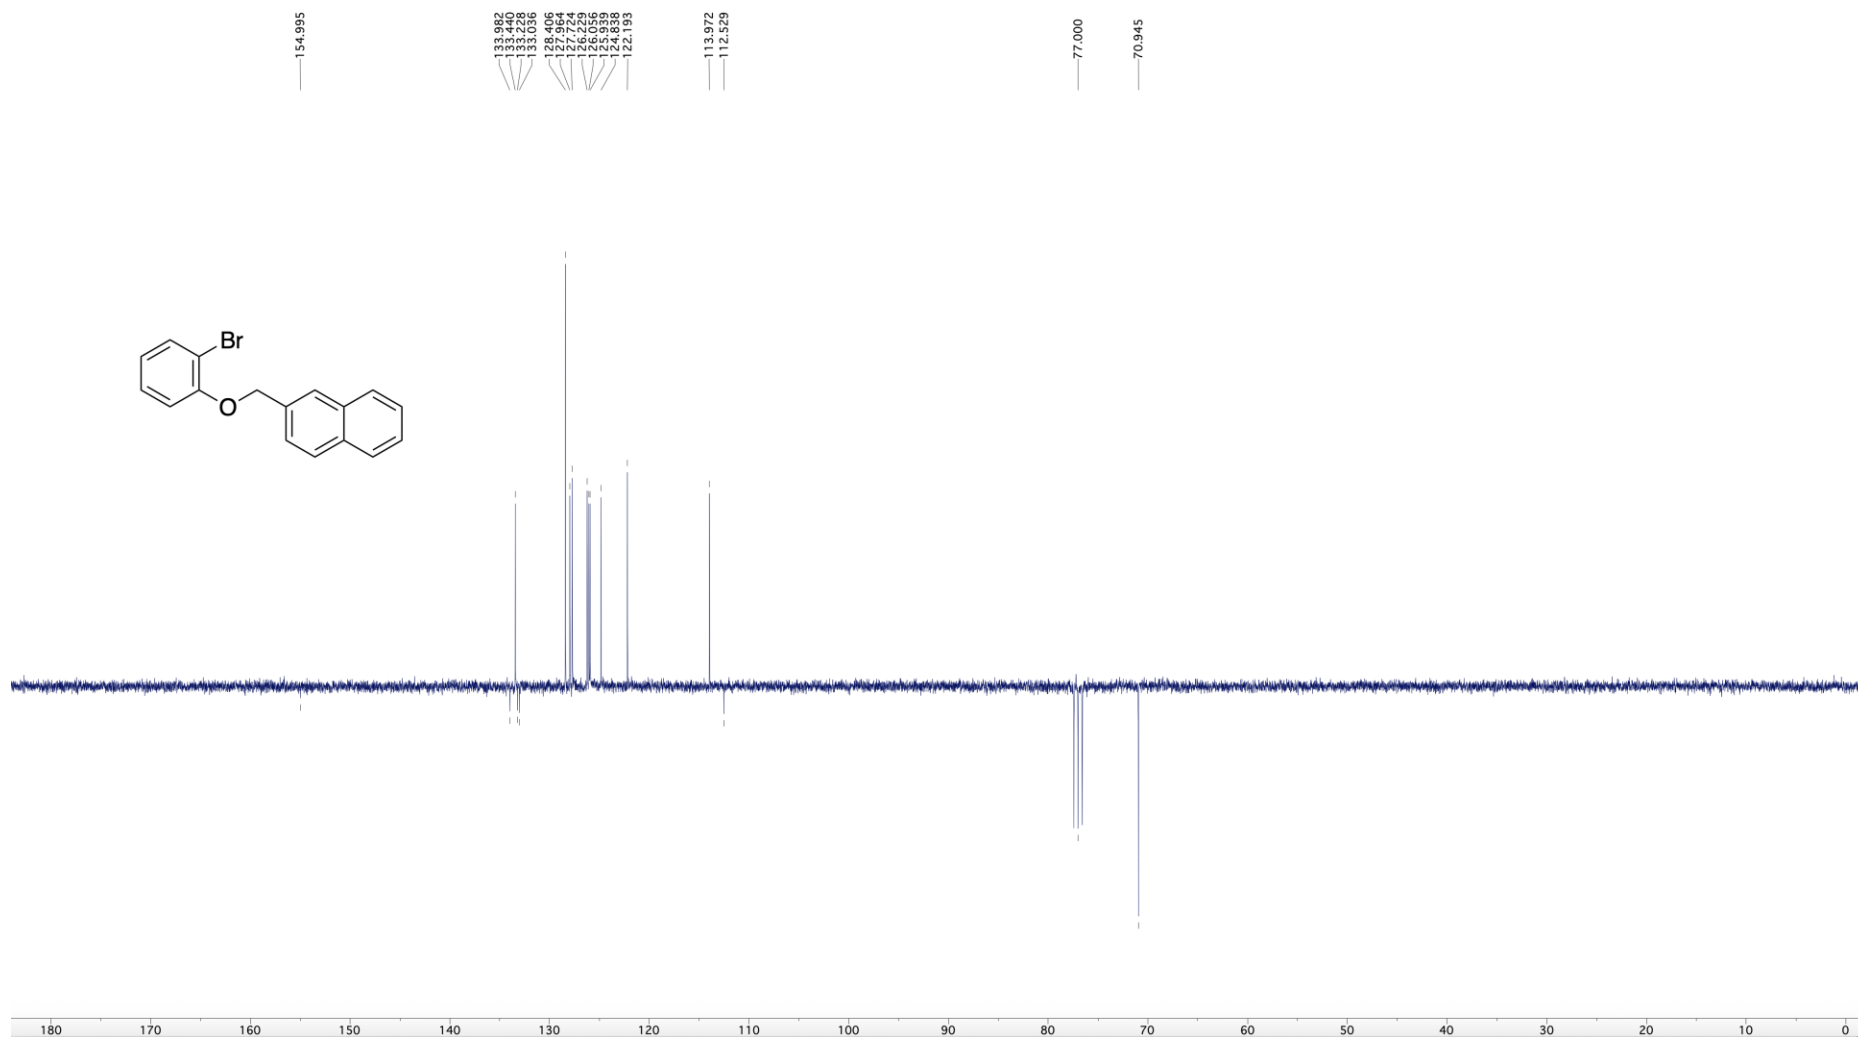

Figure S36. 300 MHz  $^1\text{H}$  NMR spectrum of **19b**

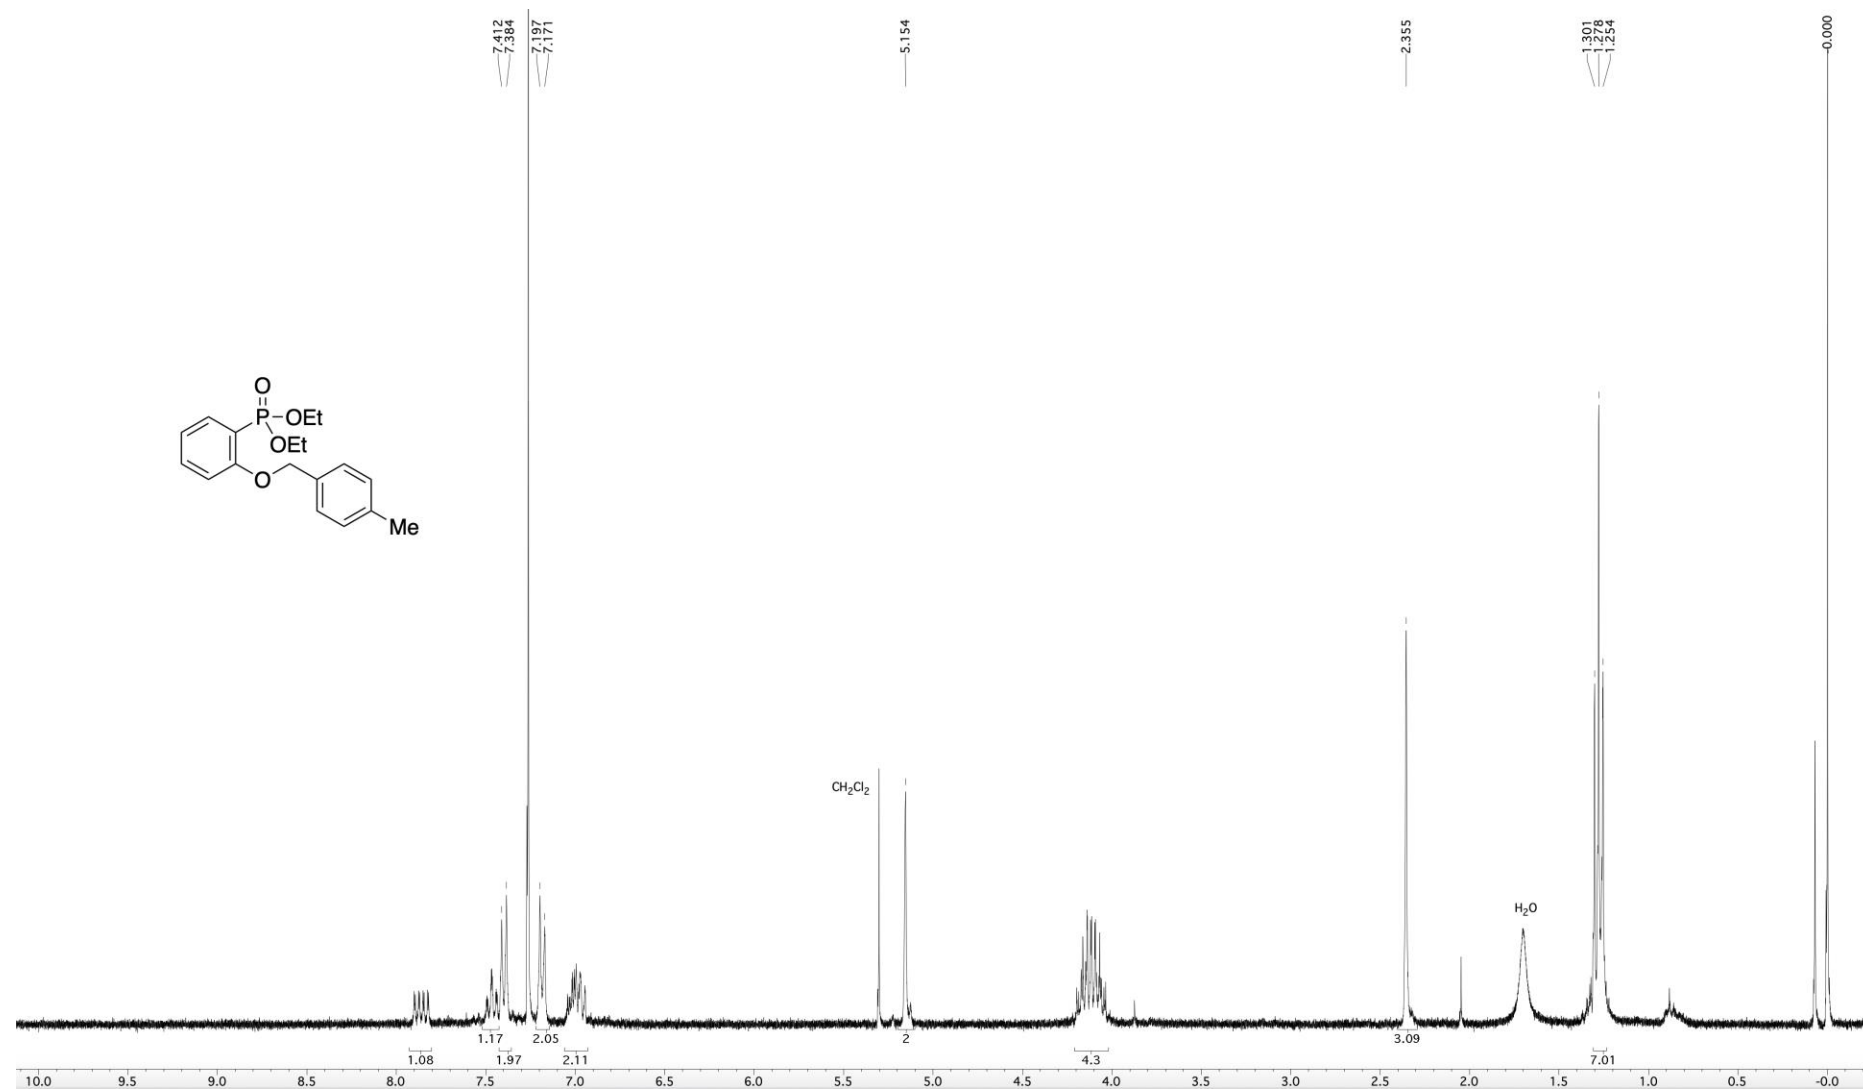

Figure S37. 162 MHz  $^{31}\text{P}$  NMR spectrum of **19b**

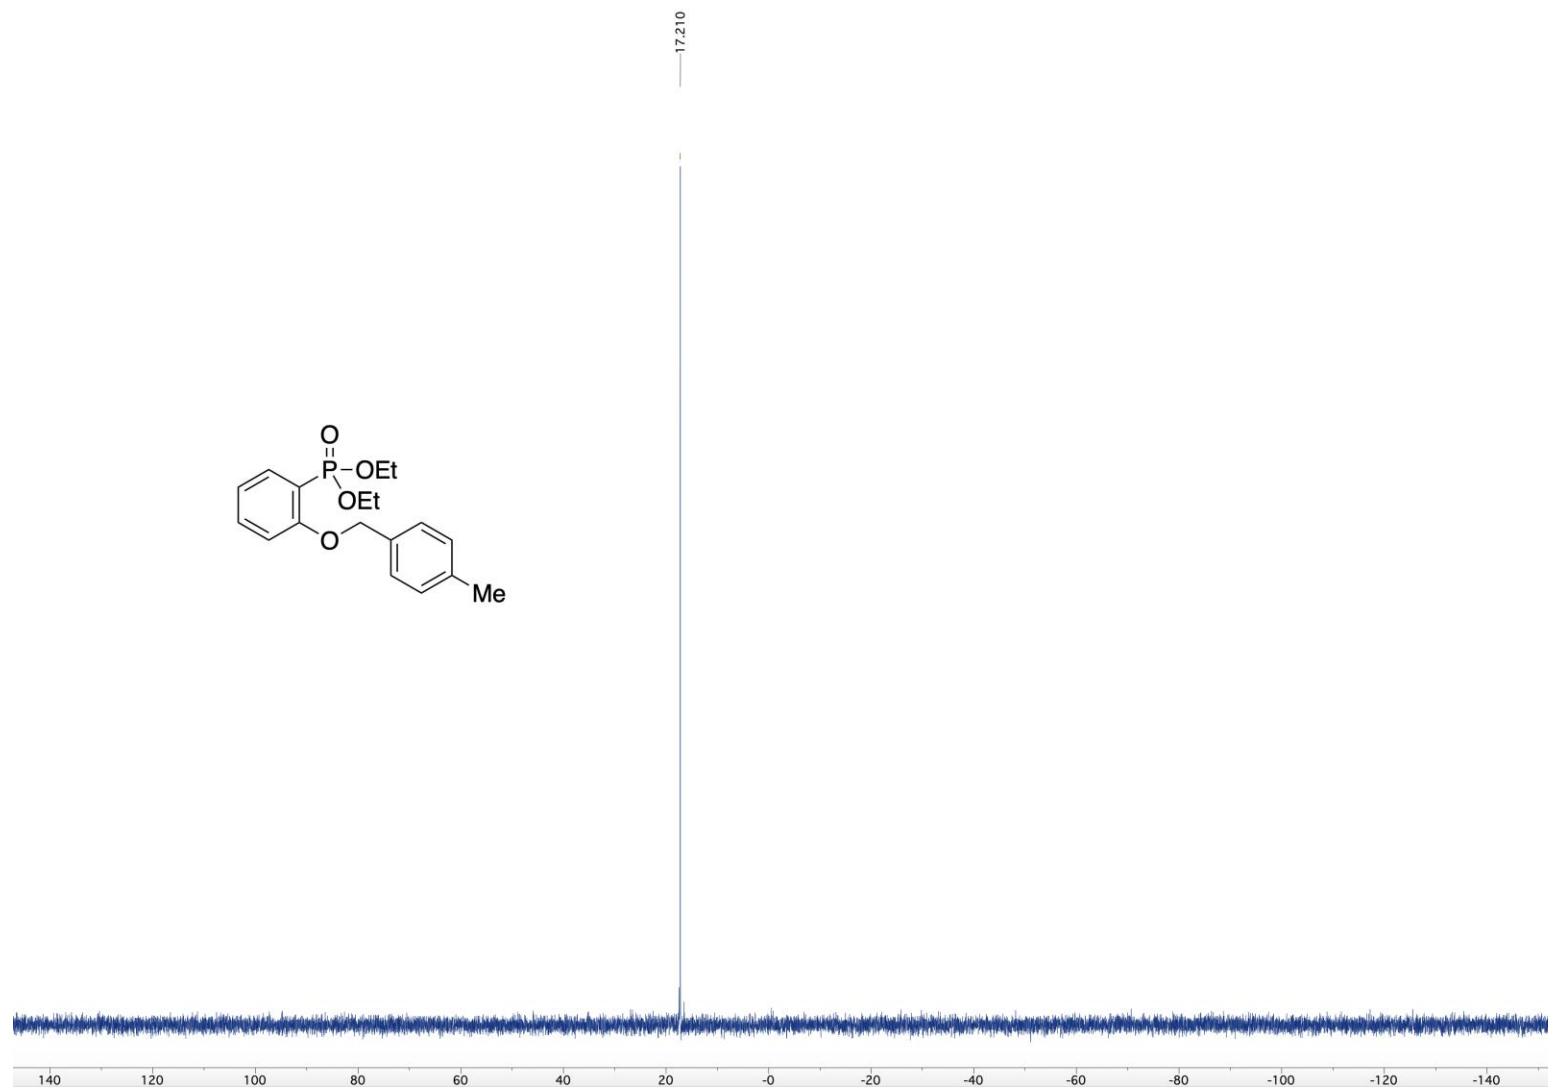

Figure S38. 125 MHz DEPTQ  $^{13}\text{C}$  NMR spectrum of **19b**

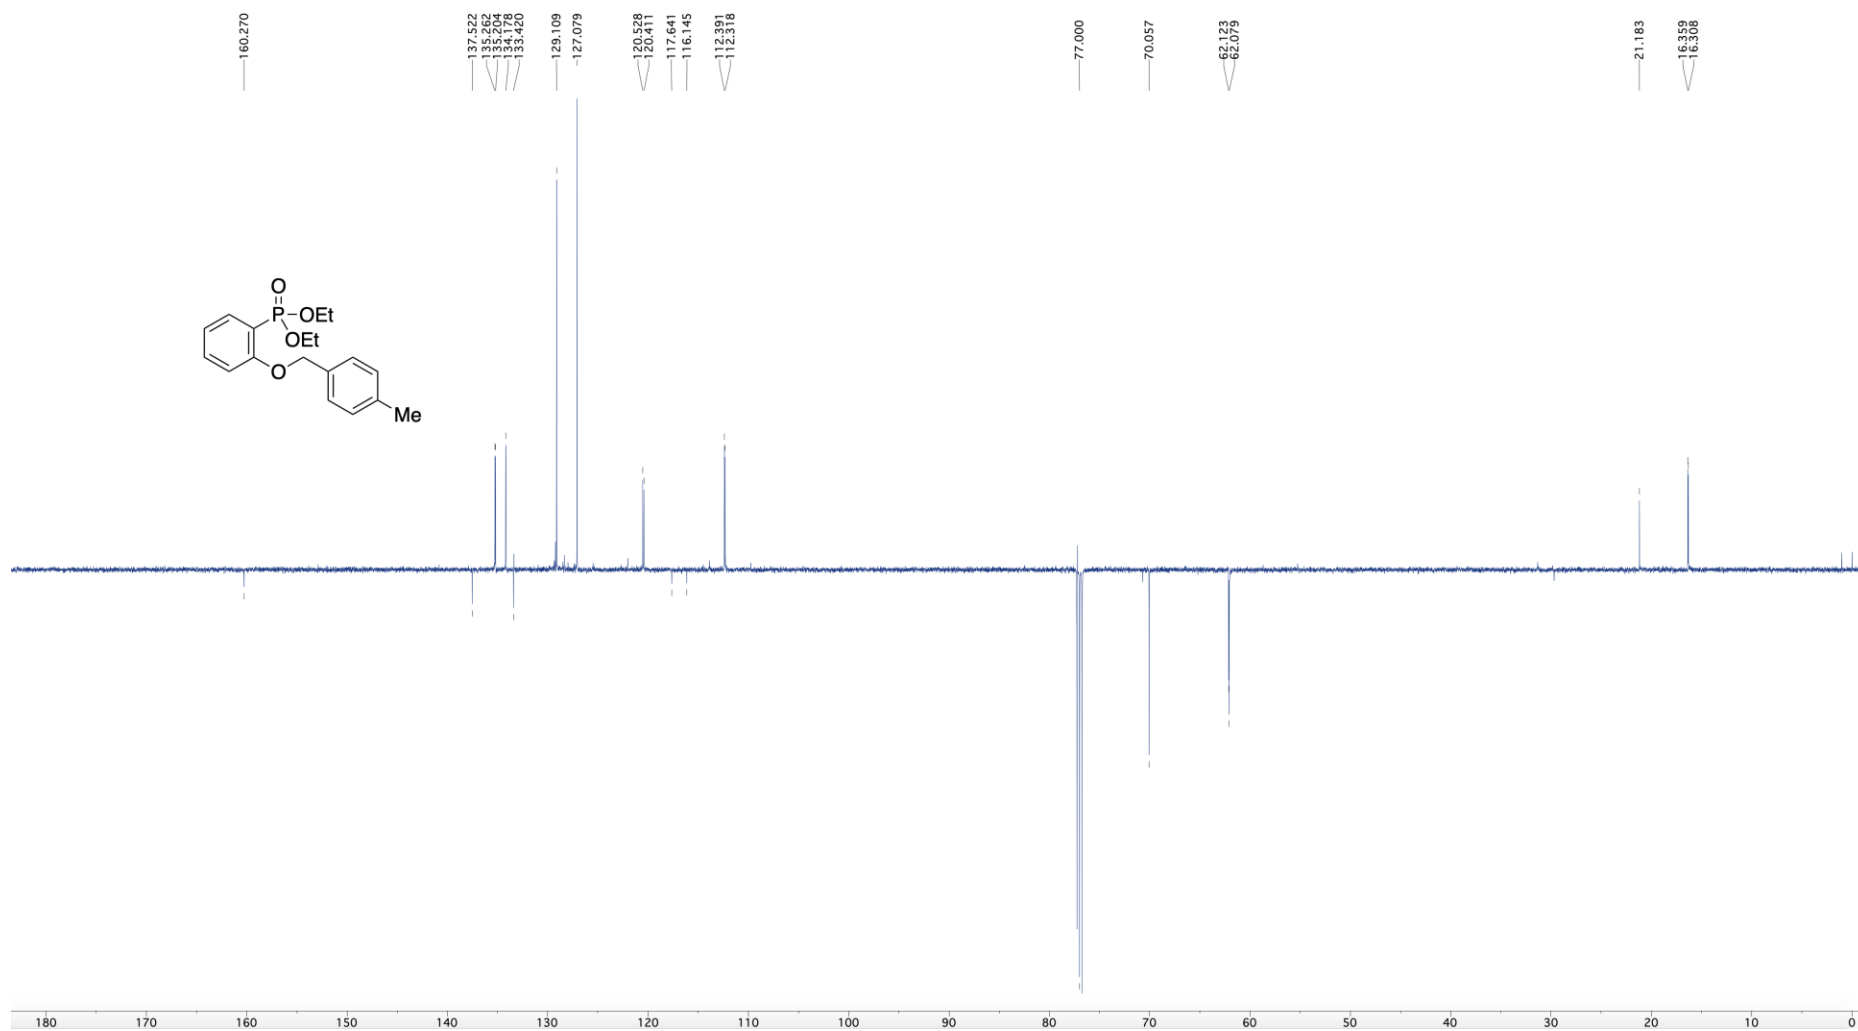

Figure S39. 300 MHz  $^1\text{H}$  NMR spectrum of **19d**

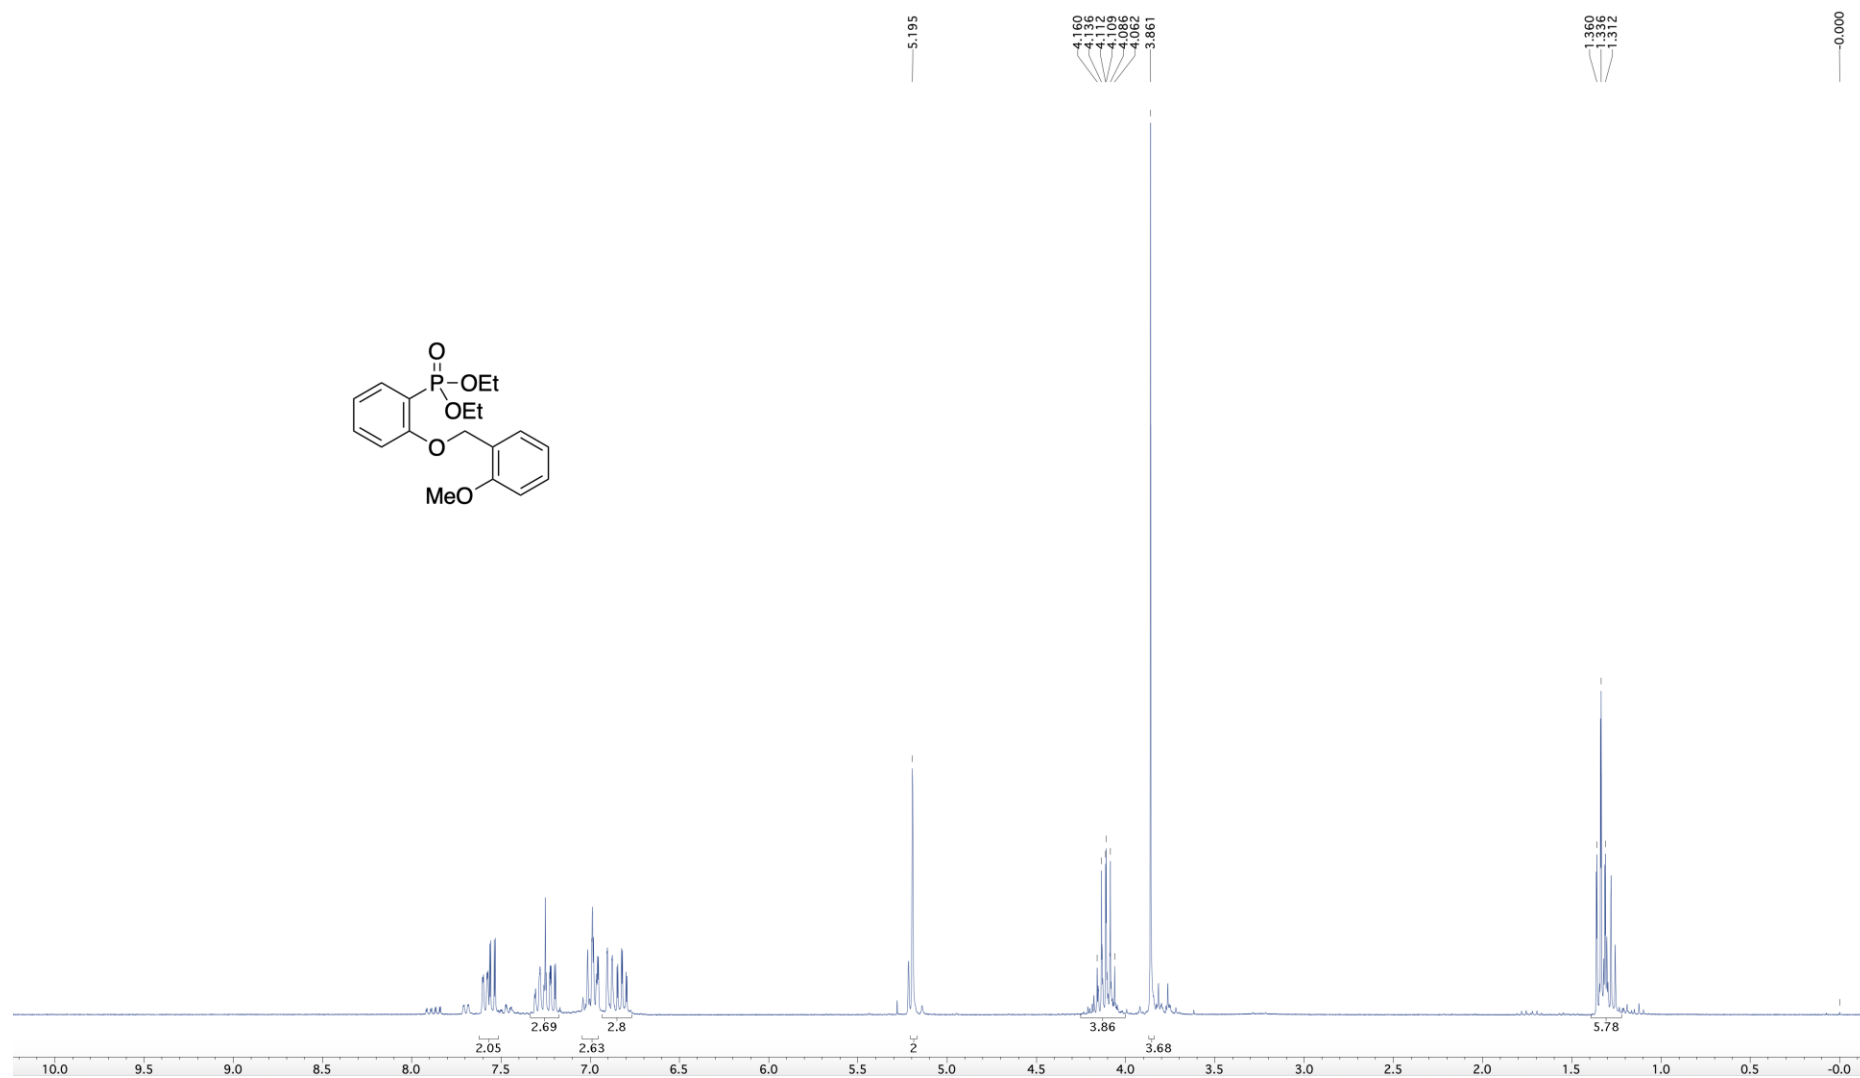

Figure S40. 121 MHz  $^{31}\text{P}$  NMR spectrum of **19d**

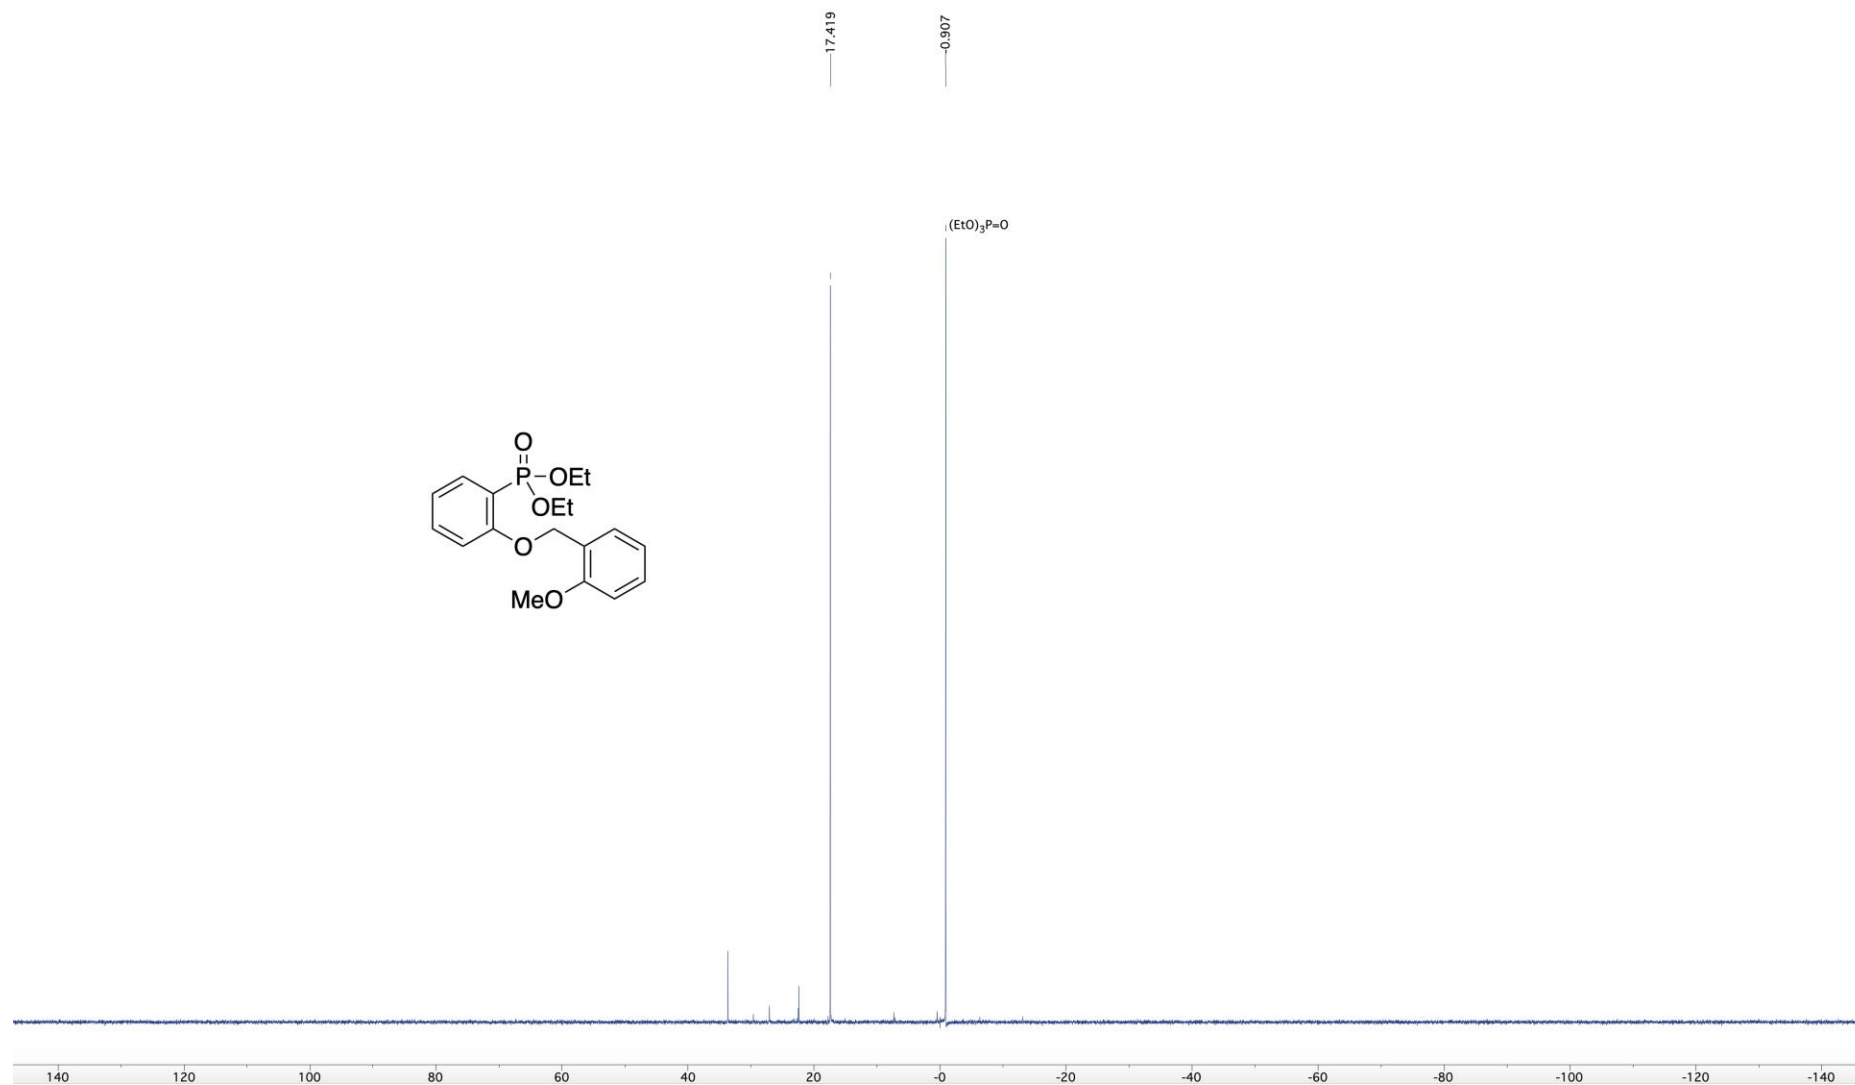

Figure S41. 300 MHz  $^1\text{H}$  NMR spectrum of **19e**

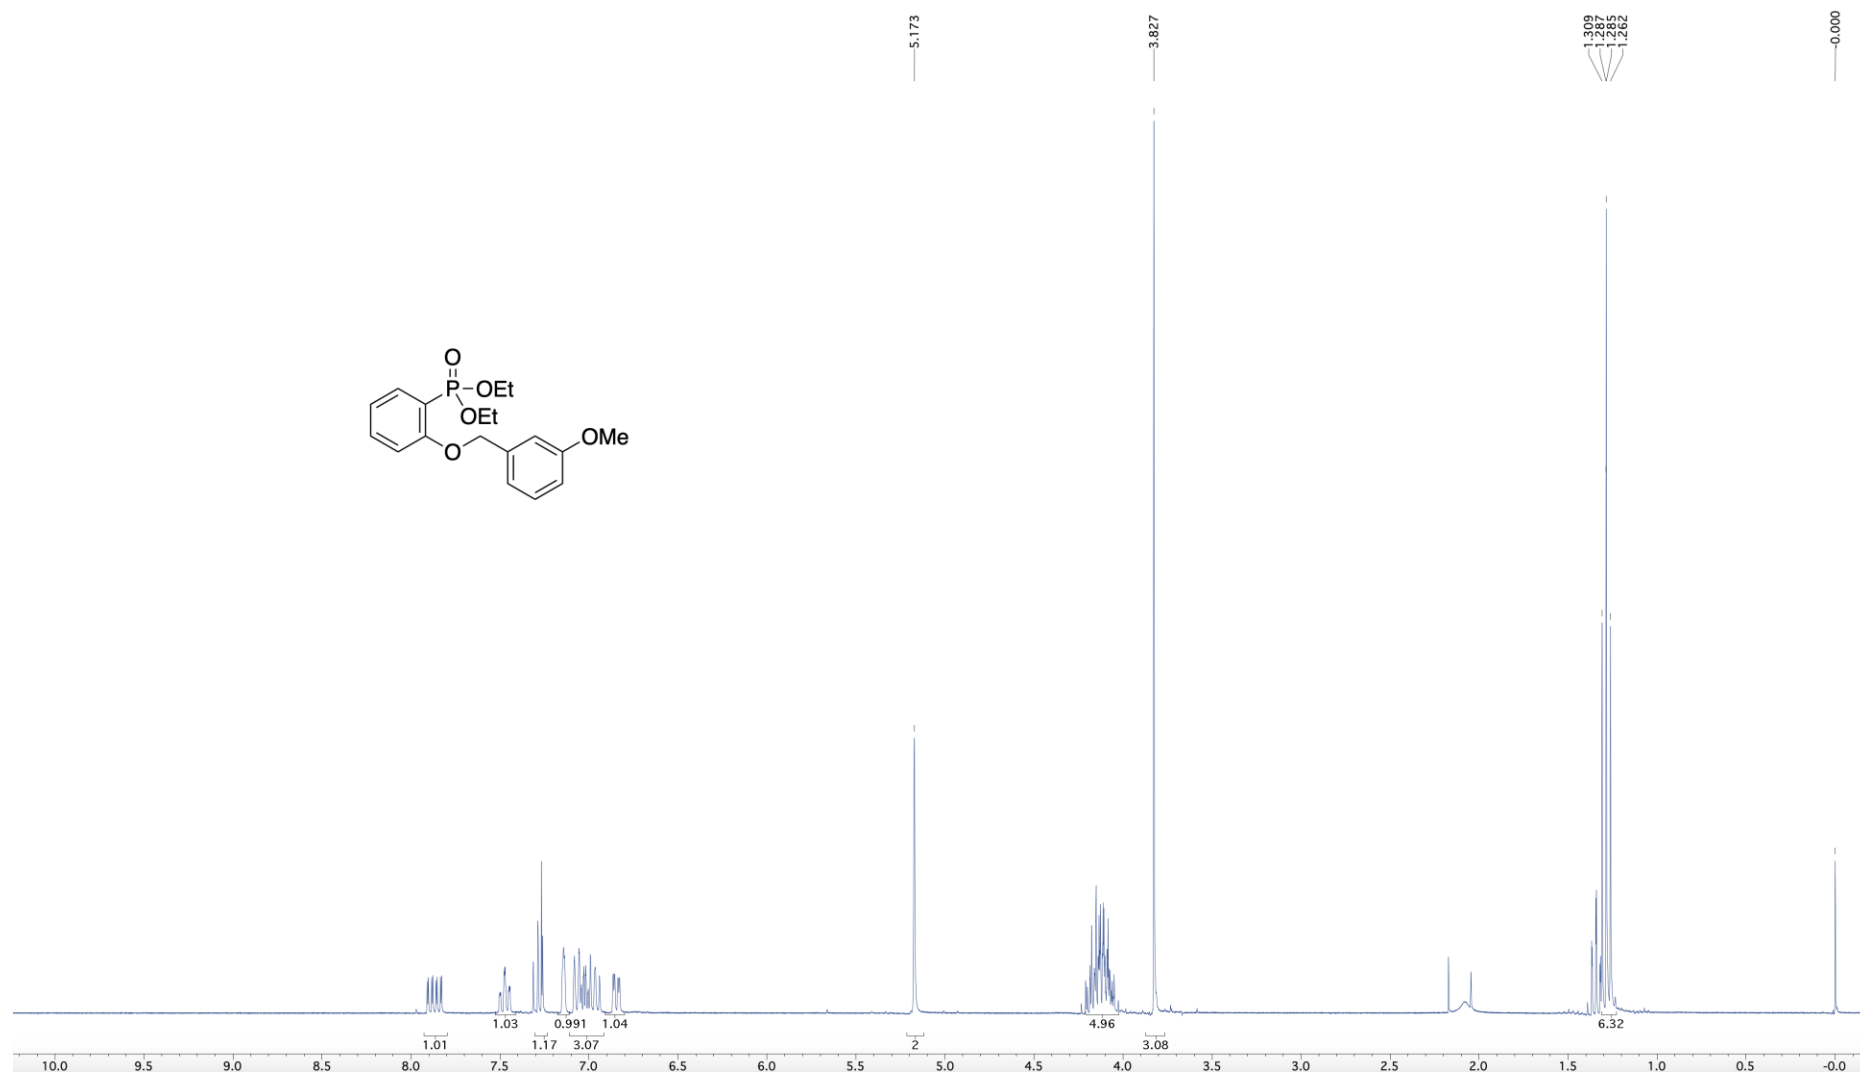



Figure S42. 202 MHz  $^{31}\text{P}$  NMR spectrum of **19e**

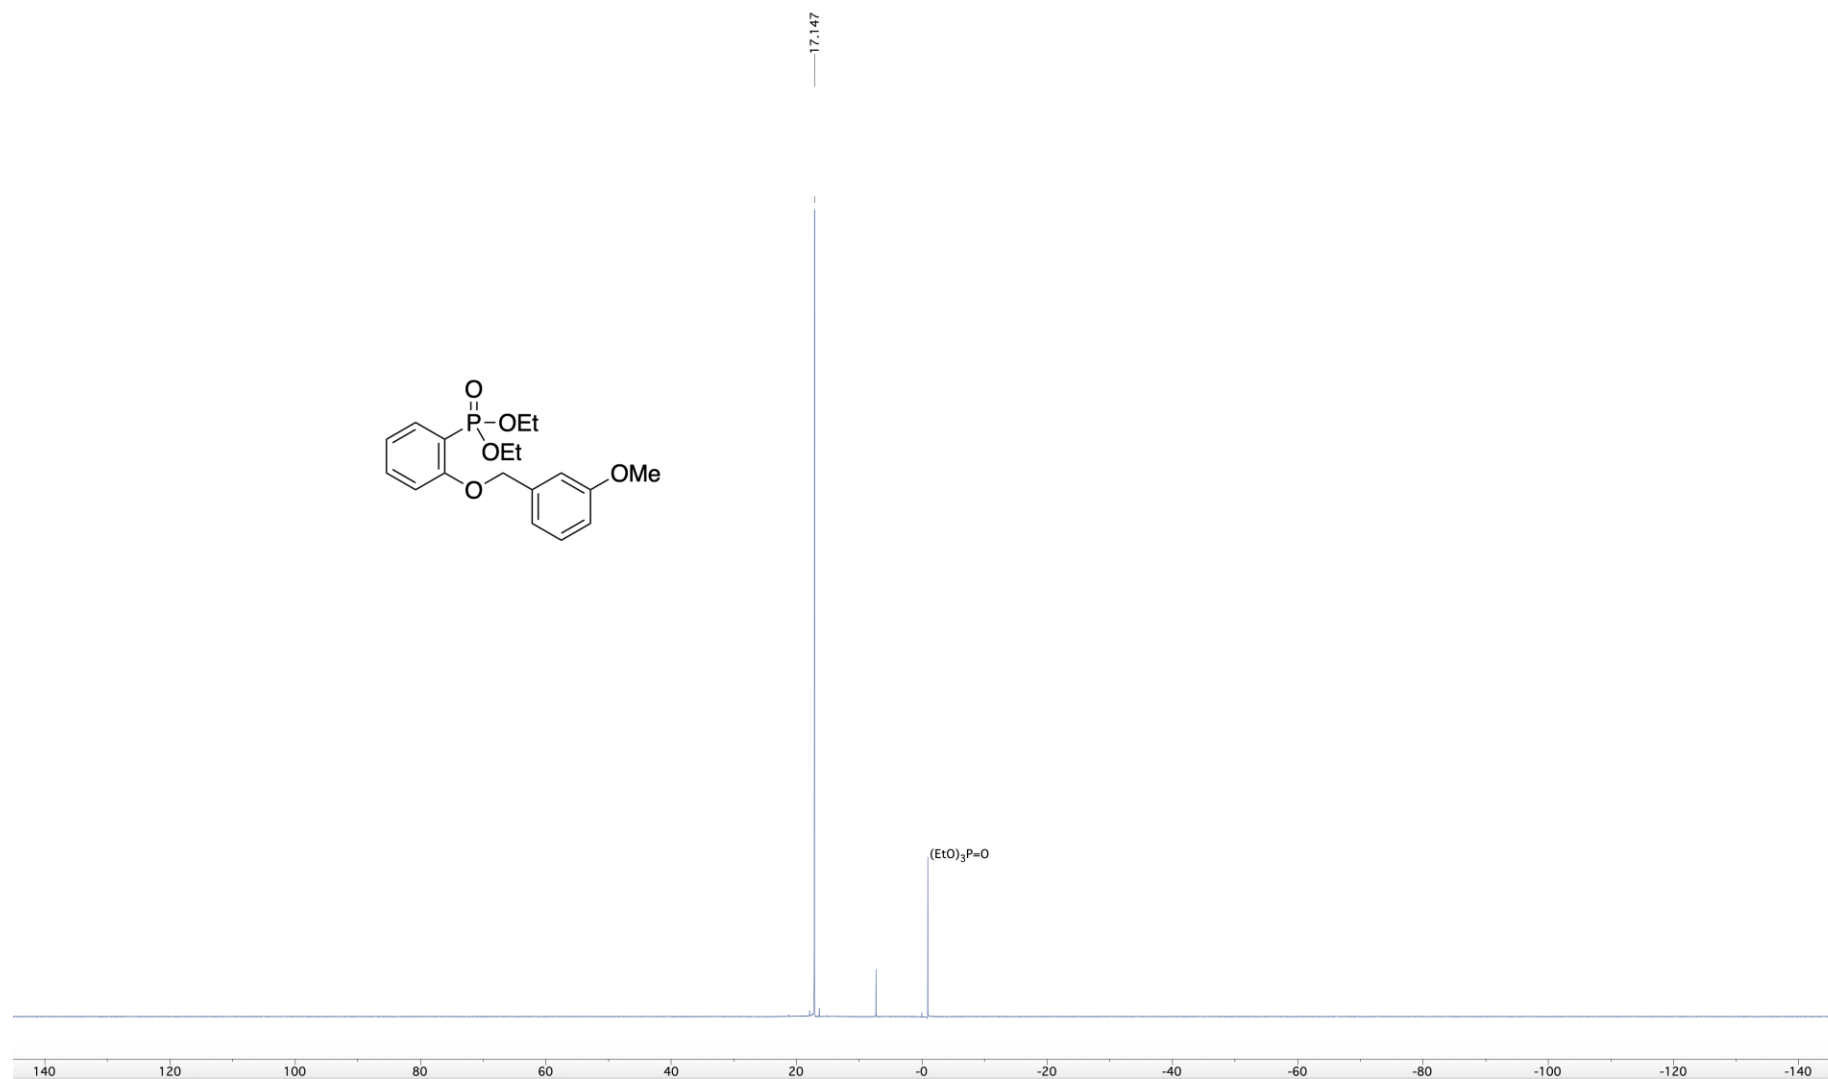

Figure S43. 75 MHz DEPTQ  $^{13}\text{C}$  NMR spectrum of **19e**

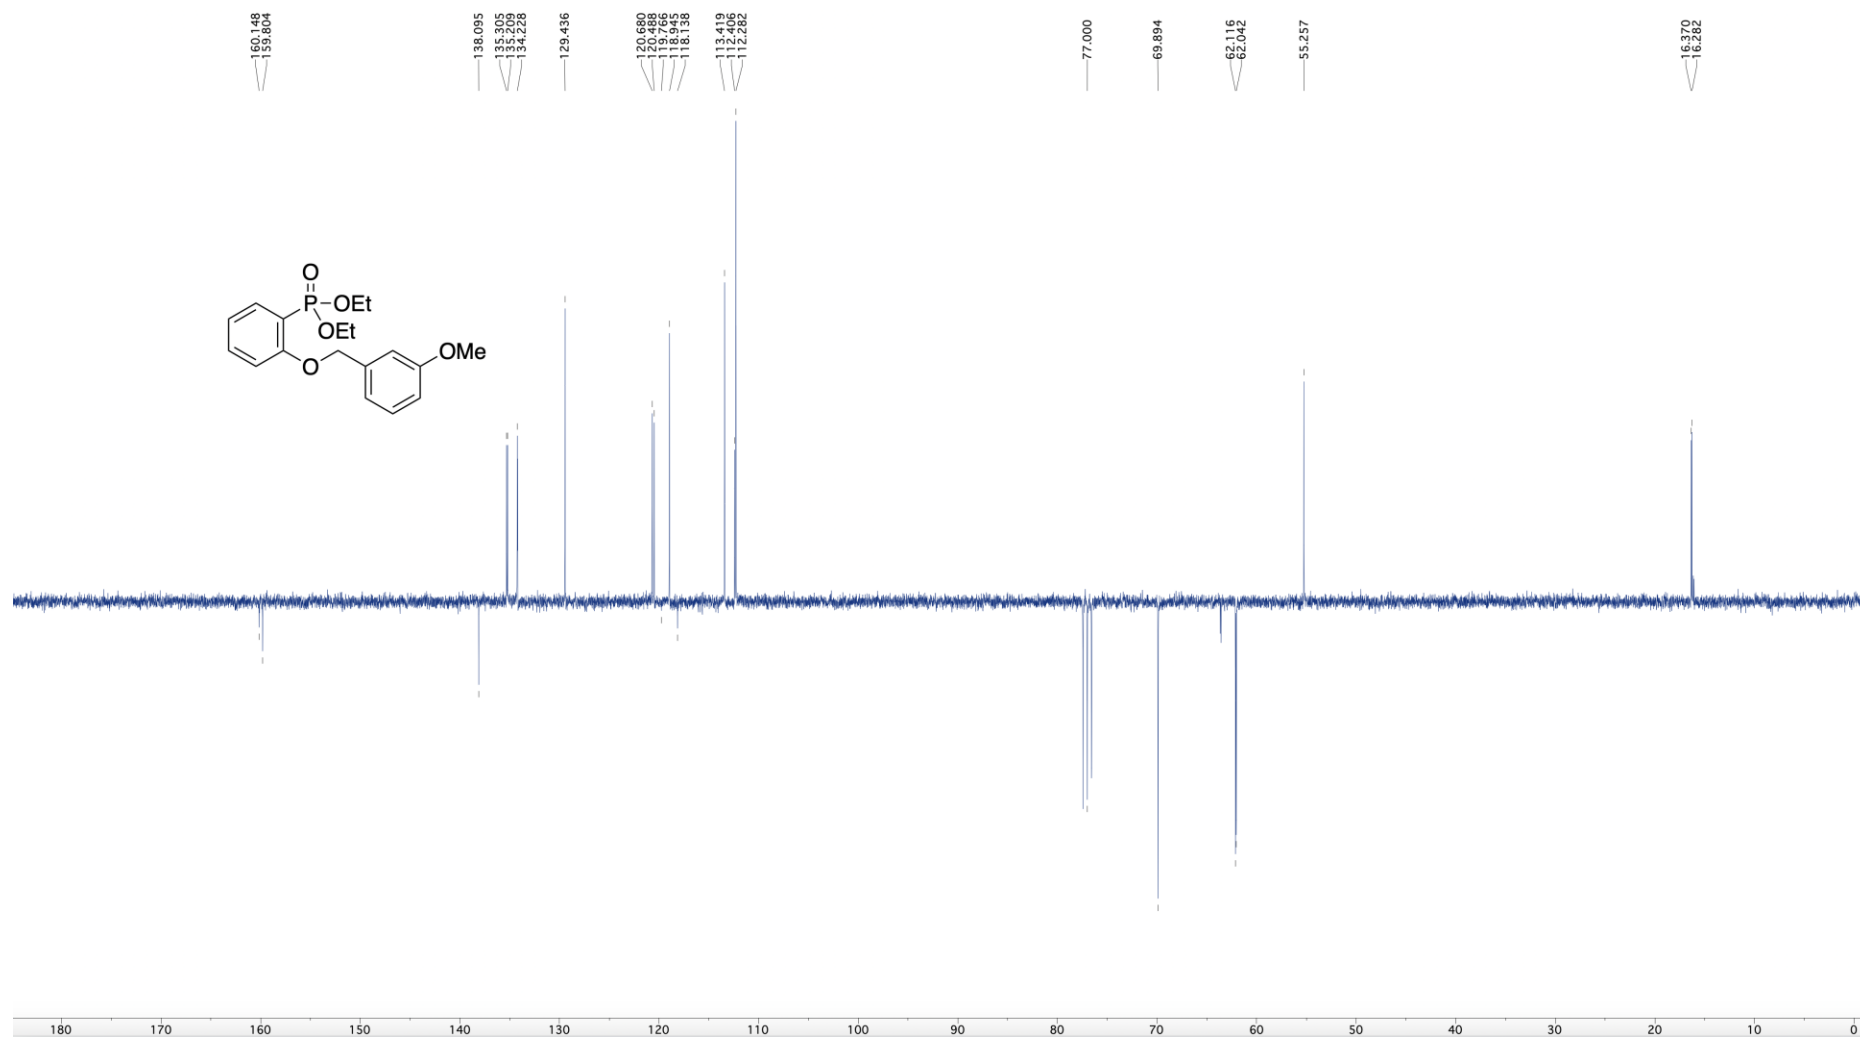

Figure S44. 121 MHz  $^{31}\text{P}$  NMR spectrum of **20**

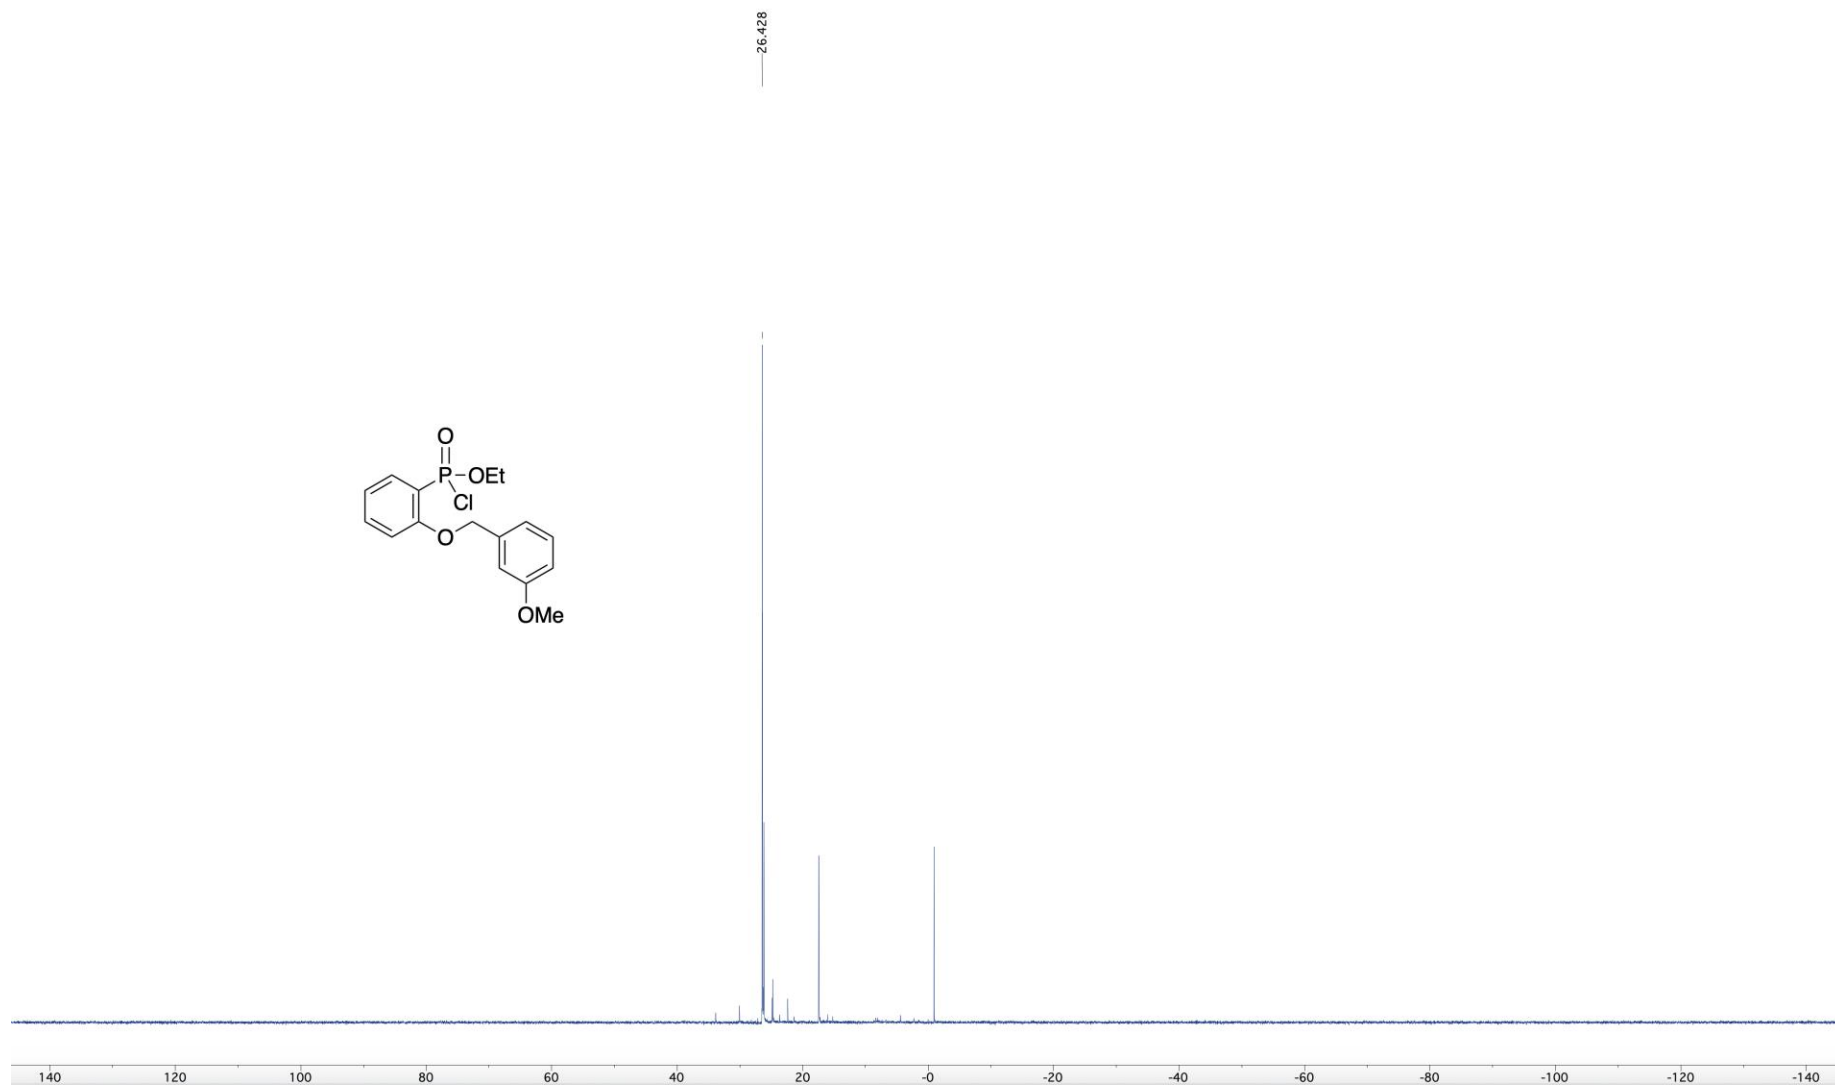

Figure S45. 300 MHz  $^1\text{H}$  NMR spectrum of **22**

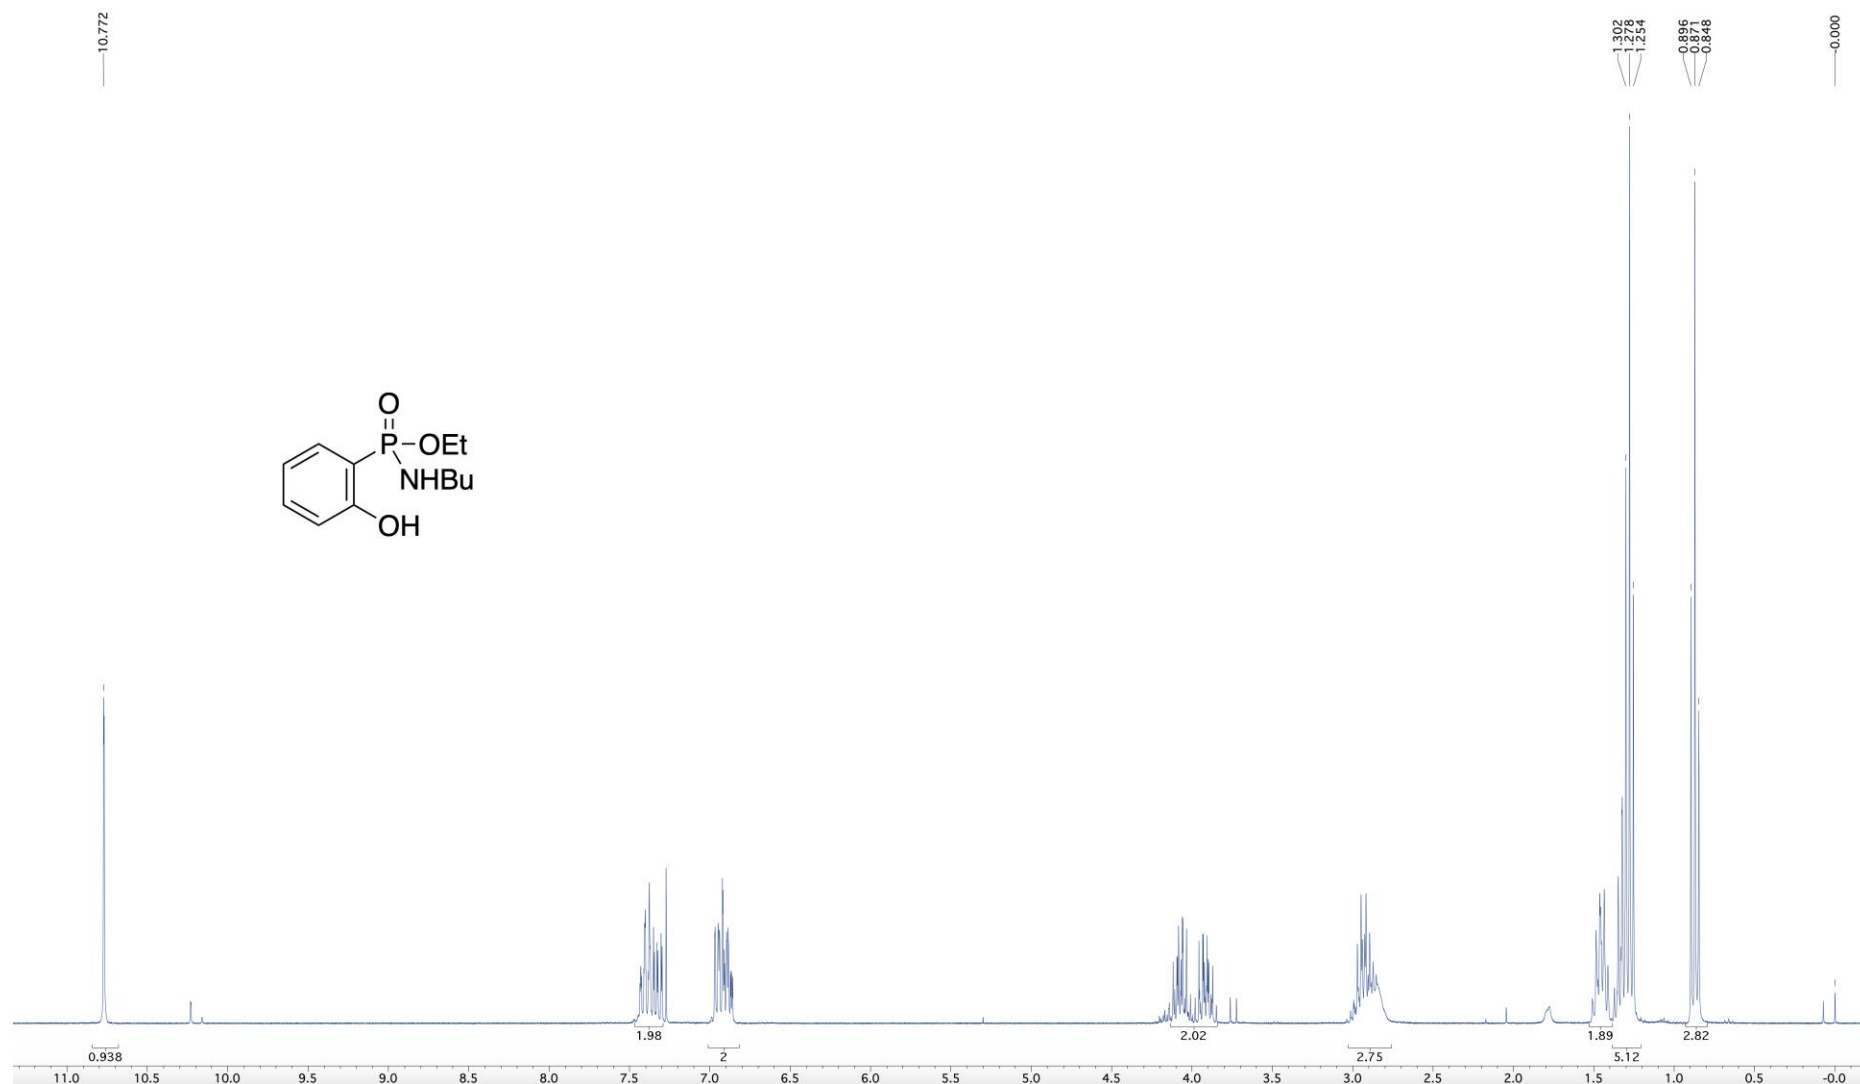

Figure S46. 121 MHz  $^{31}\text{P}$  NMR spectrum of **22**

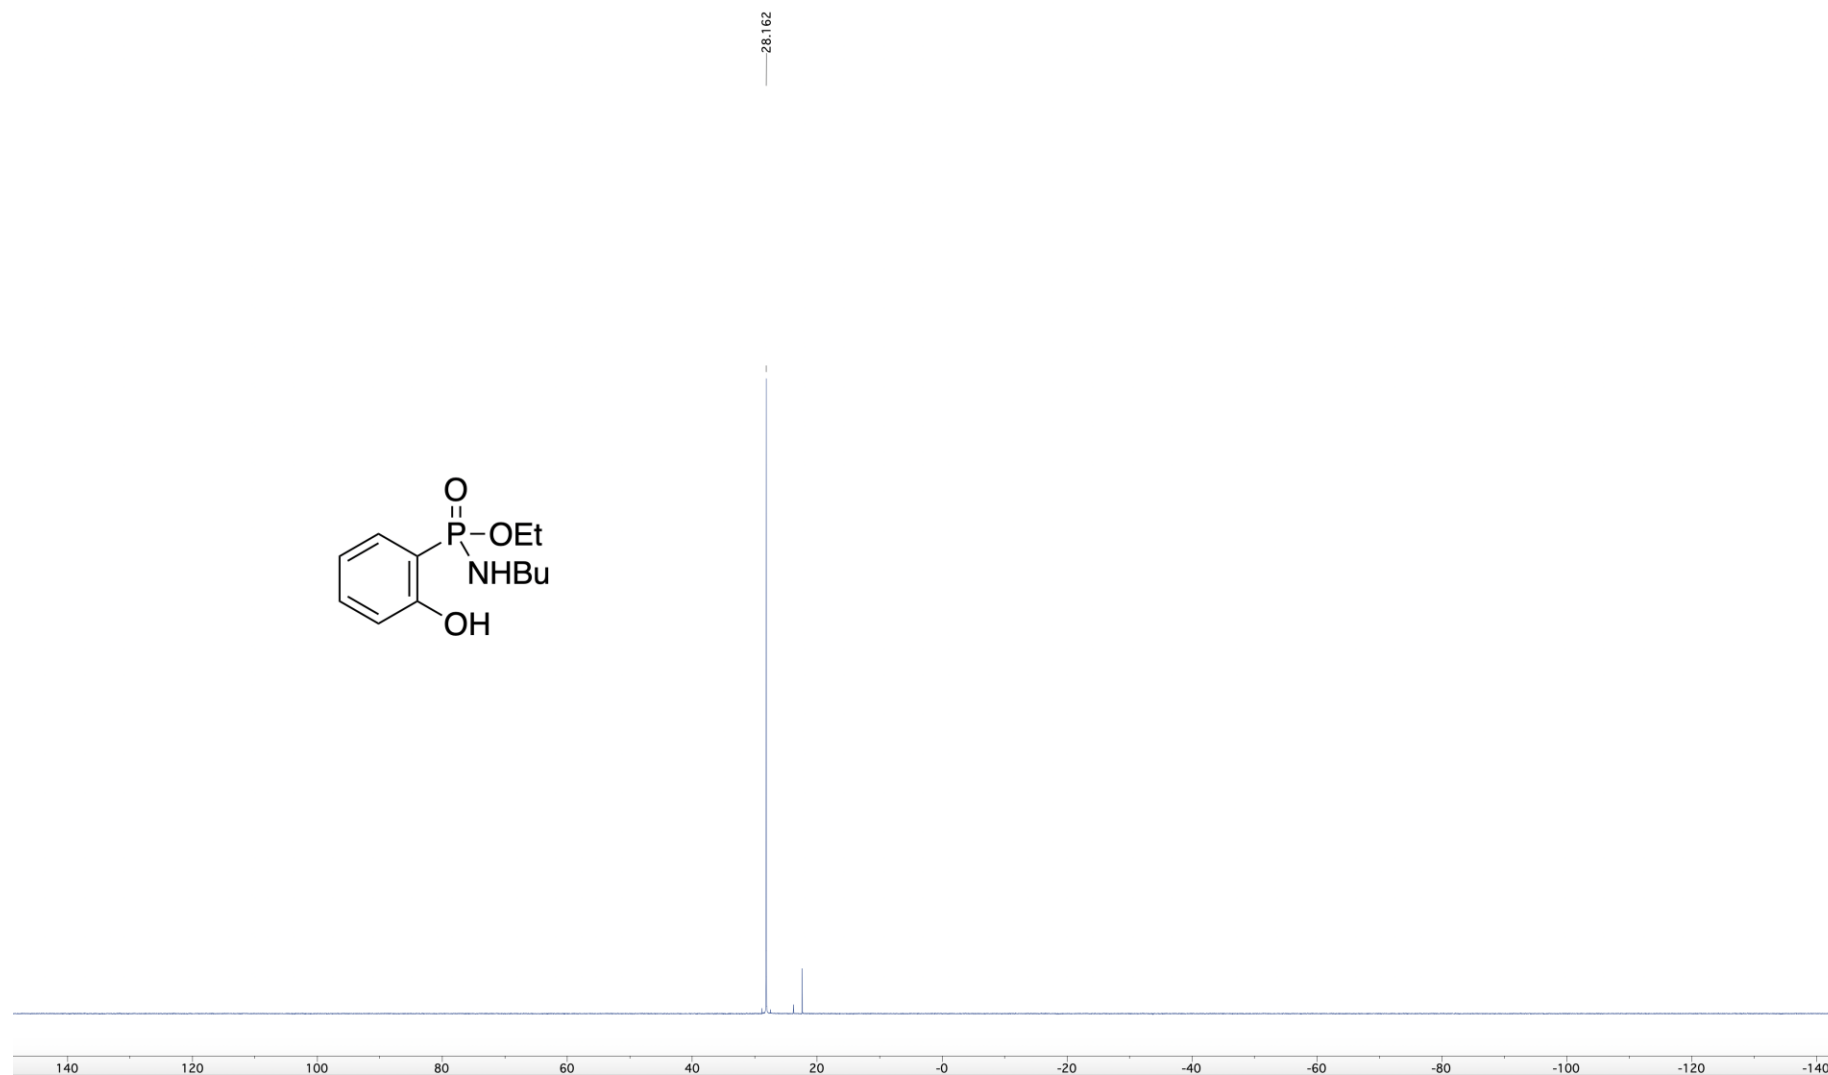

Figure S47. 75 MHz DEPTQ  $^{13}\text{C}$  NMR spectrum of **22**

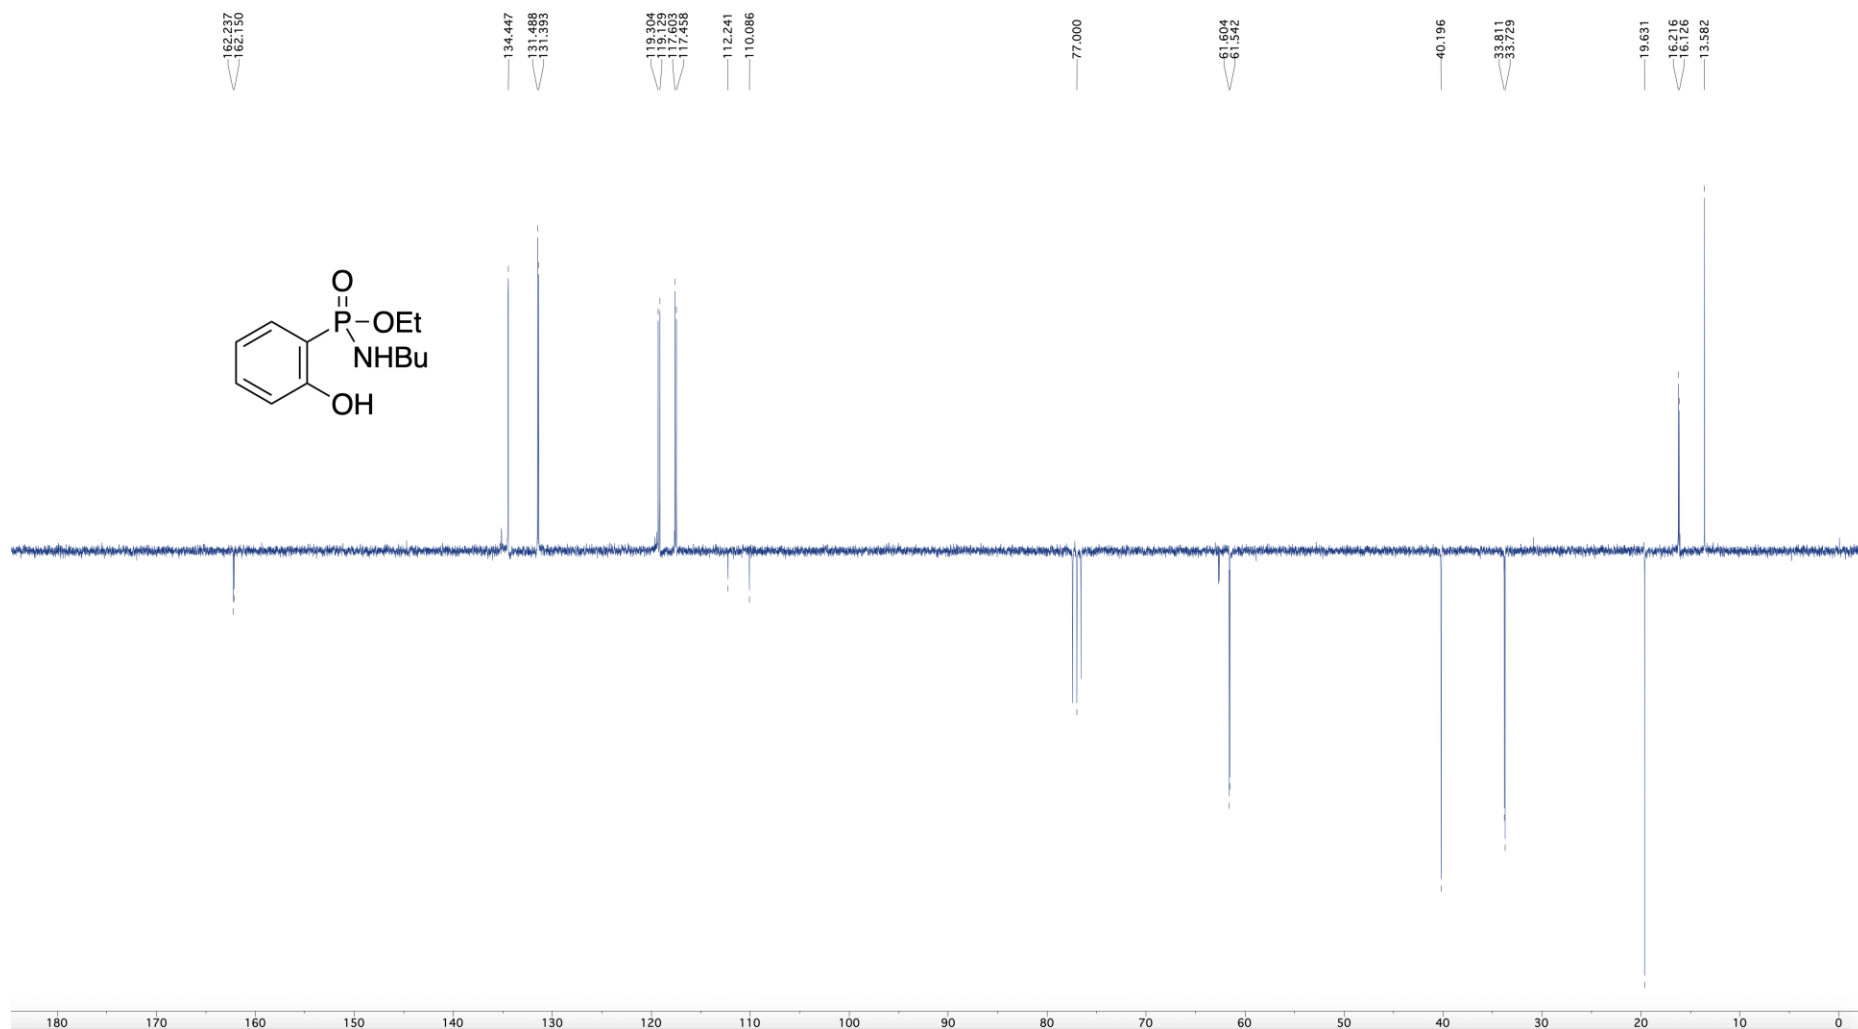

Figure S48. 300 MHz  $^1\text{H}$  NMR spectrum of **21a**

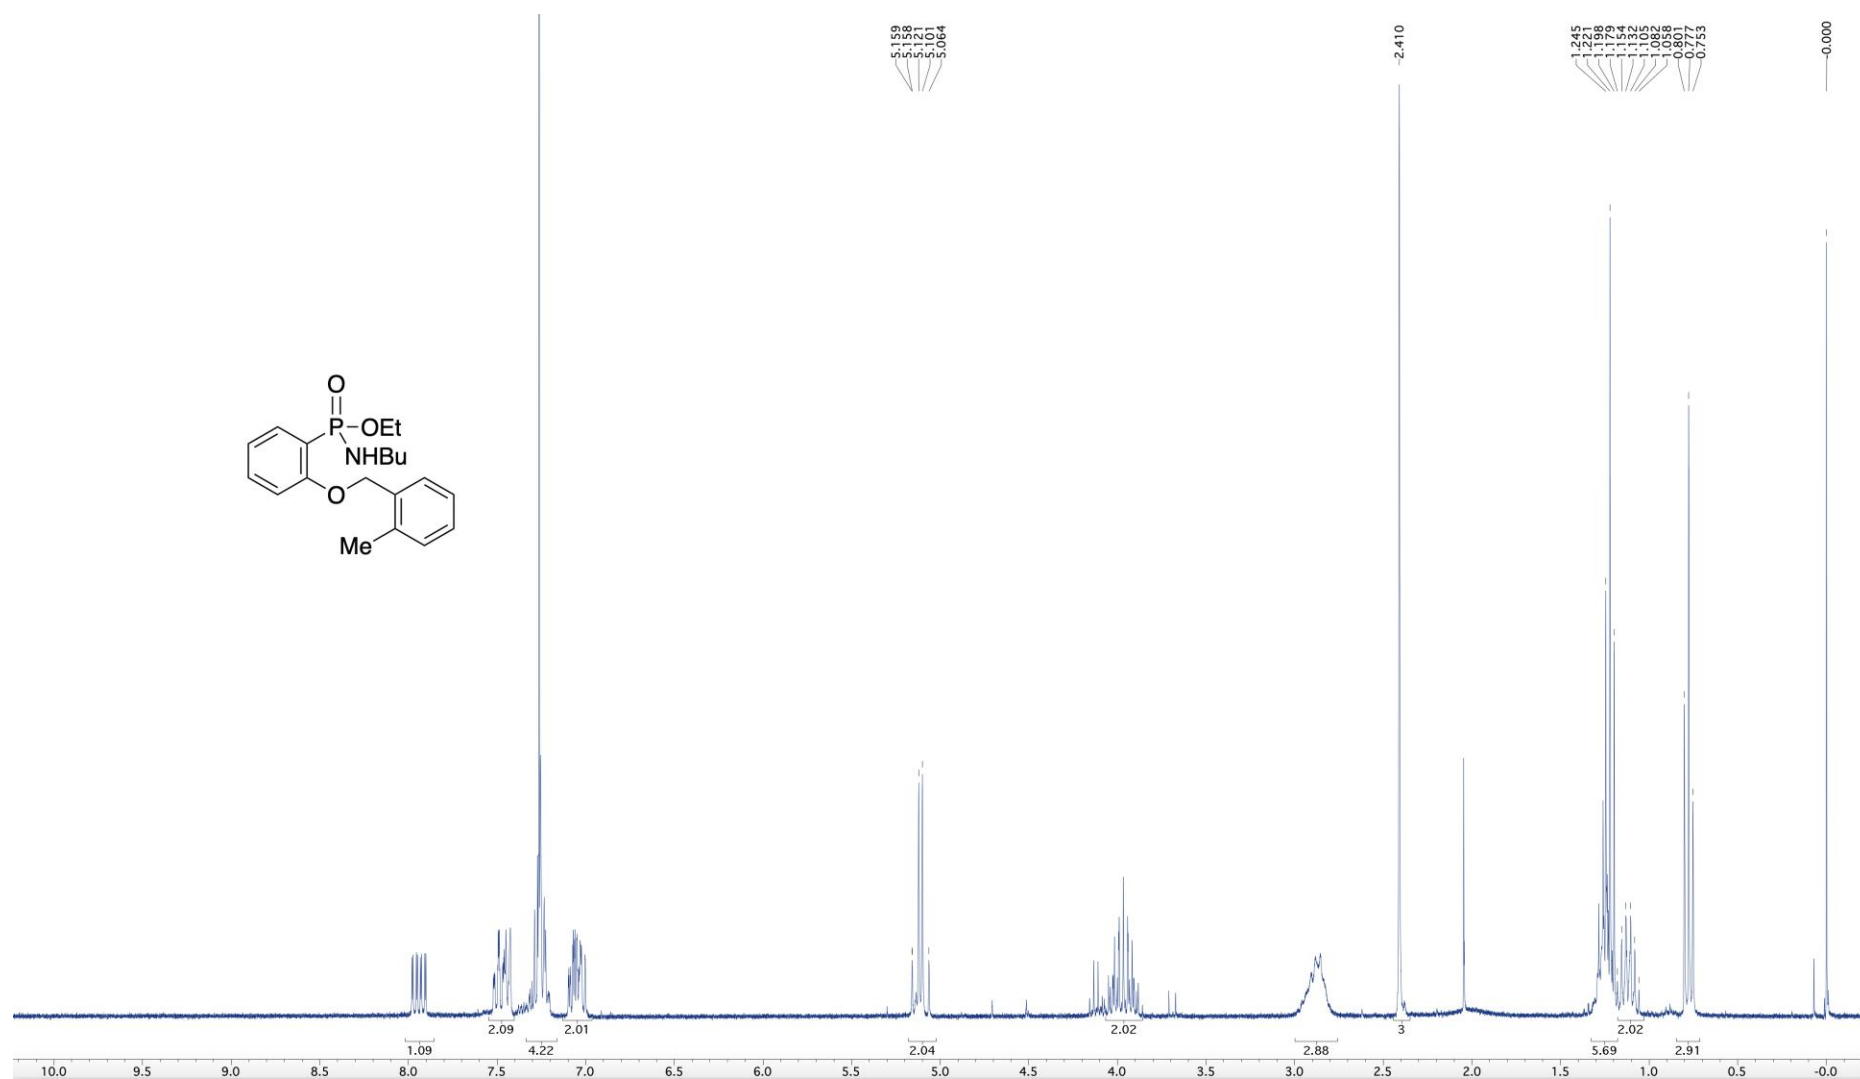

Figure S49. 121 MHz  $^{31}\text{P}$  NMR spectrum of **21a**

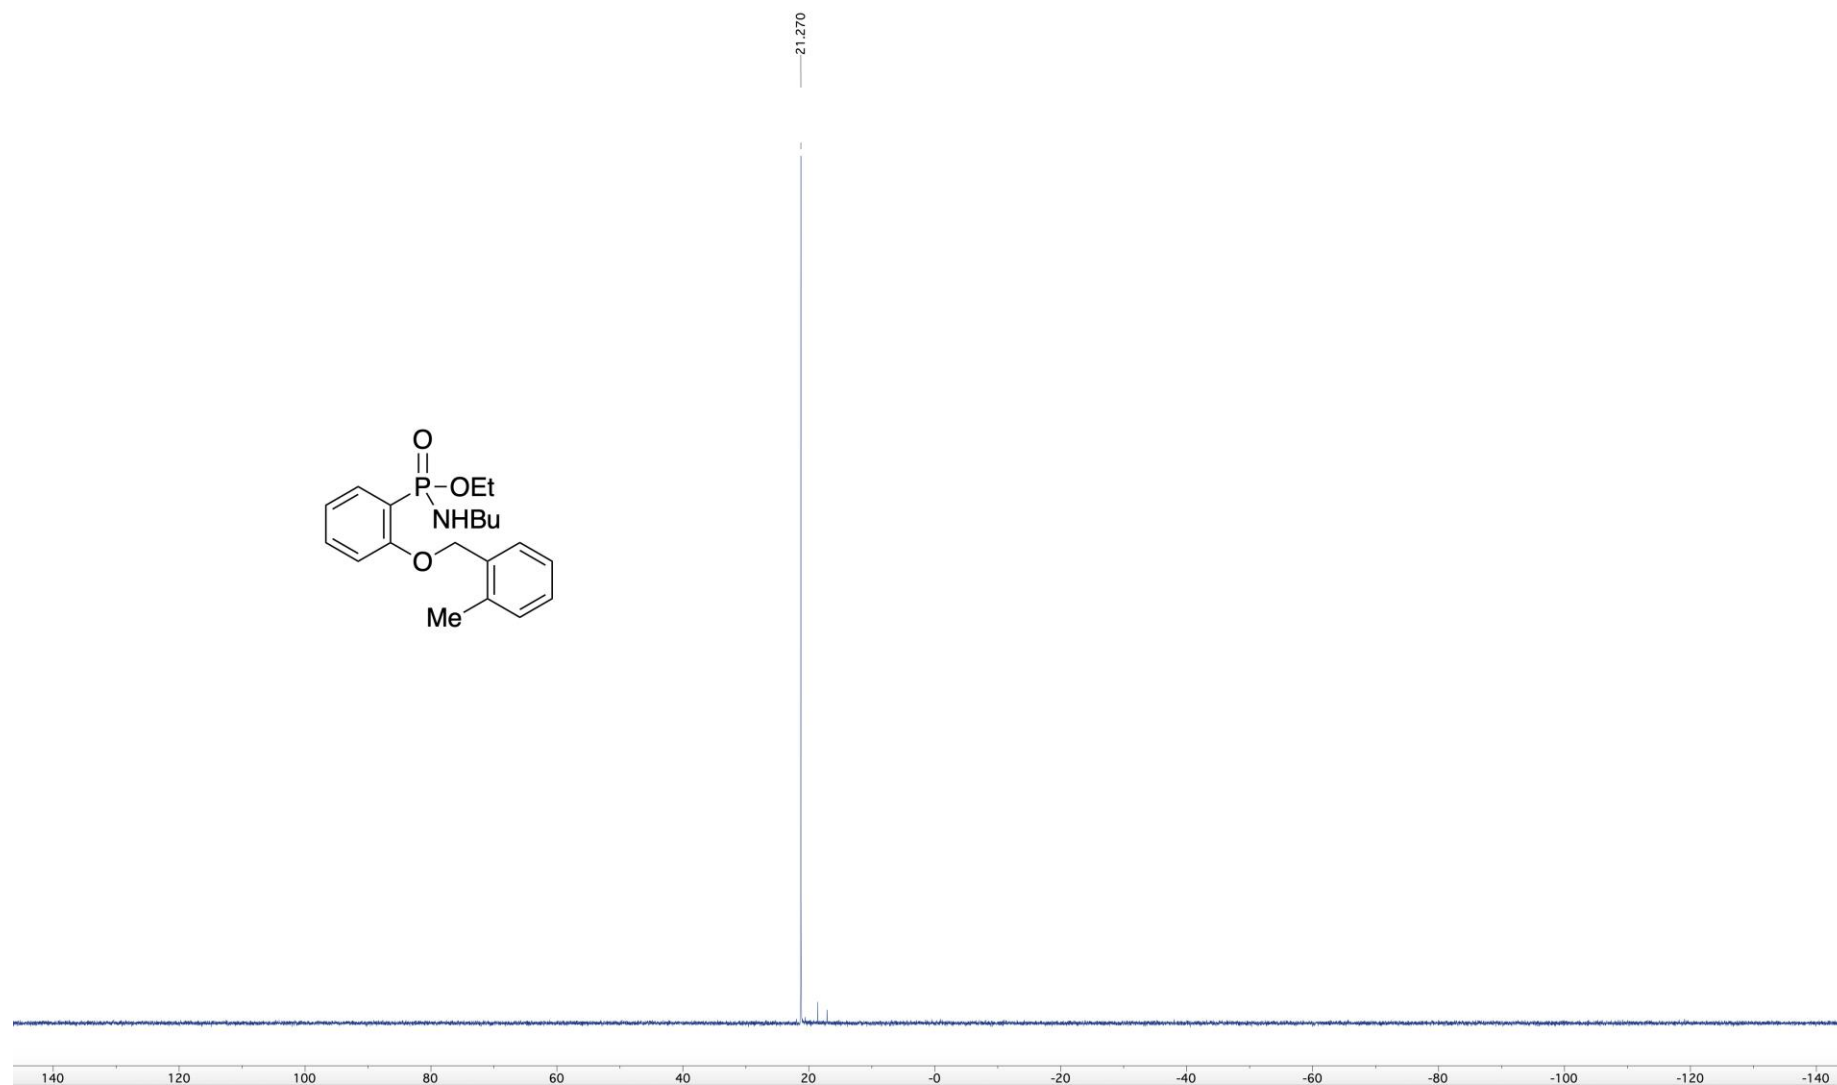



Figure S50. 75 MHz DEPTQ  $^{13}\text{C}$  NMR spectrum of **21a**

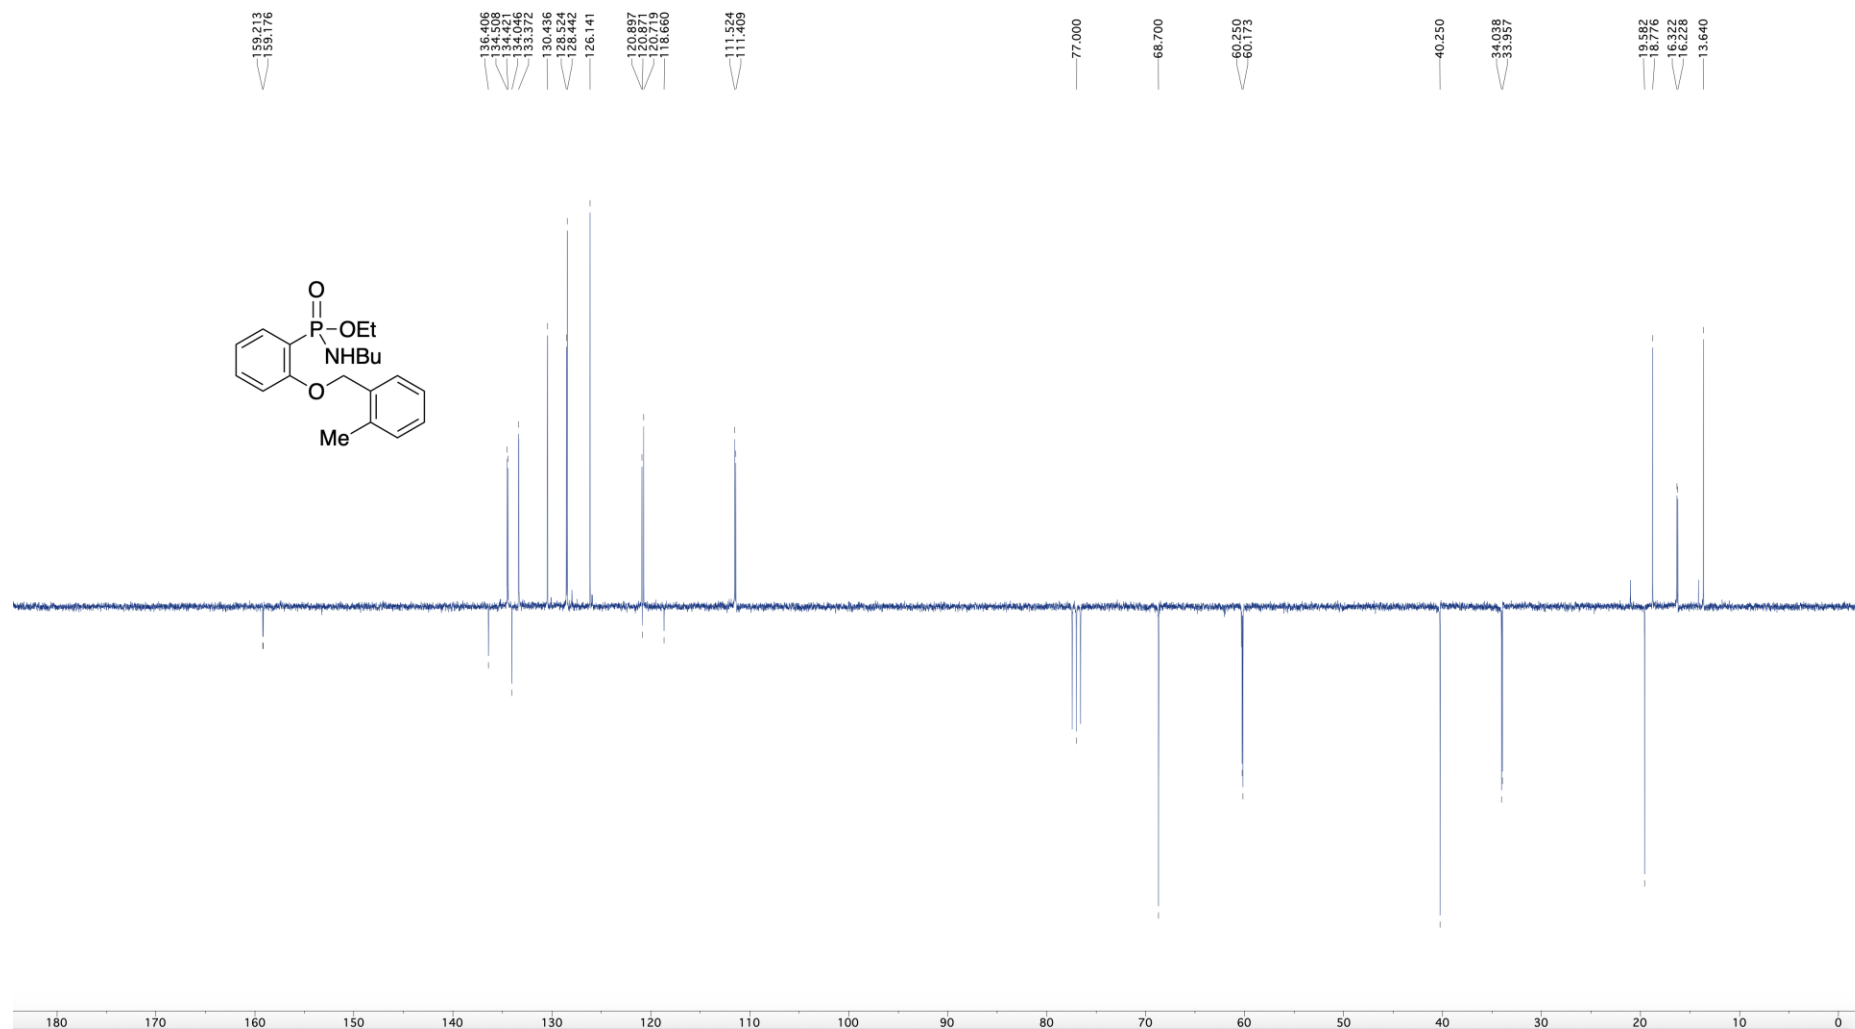

Figure S51. 400 MHz  $^1\text{H}$  NMR spectrum of **21b**

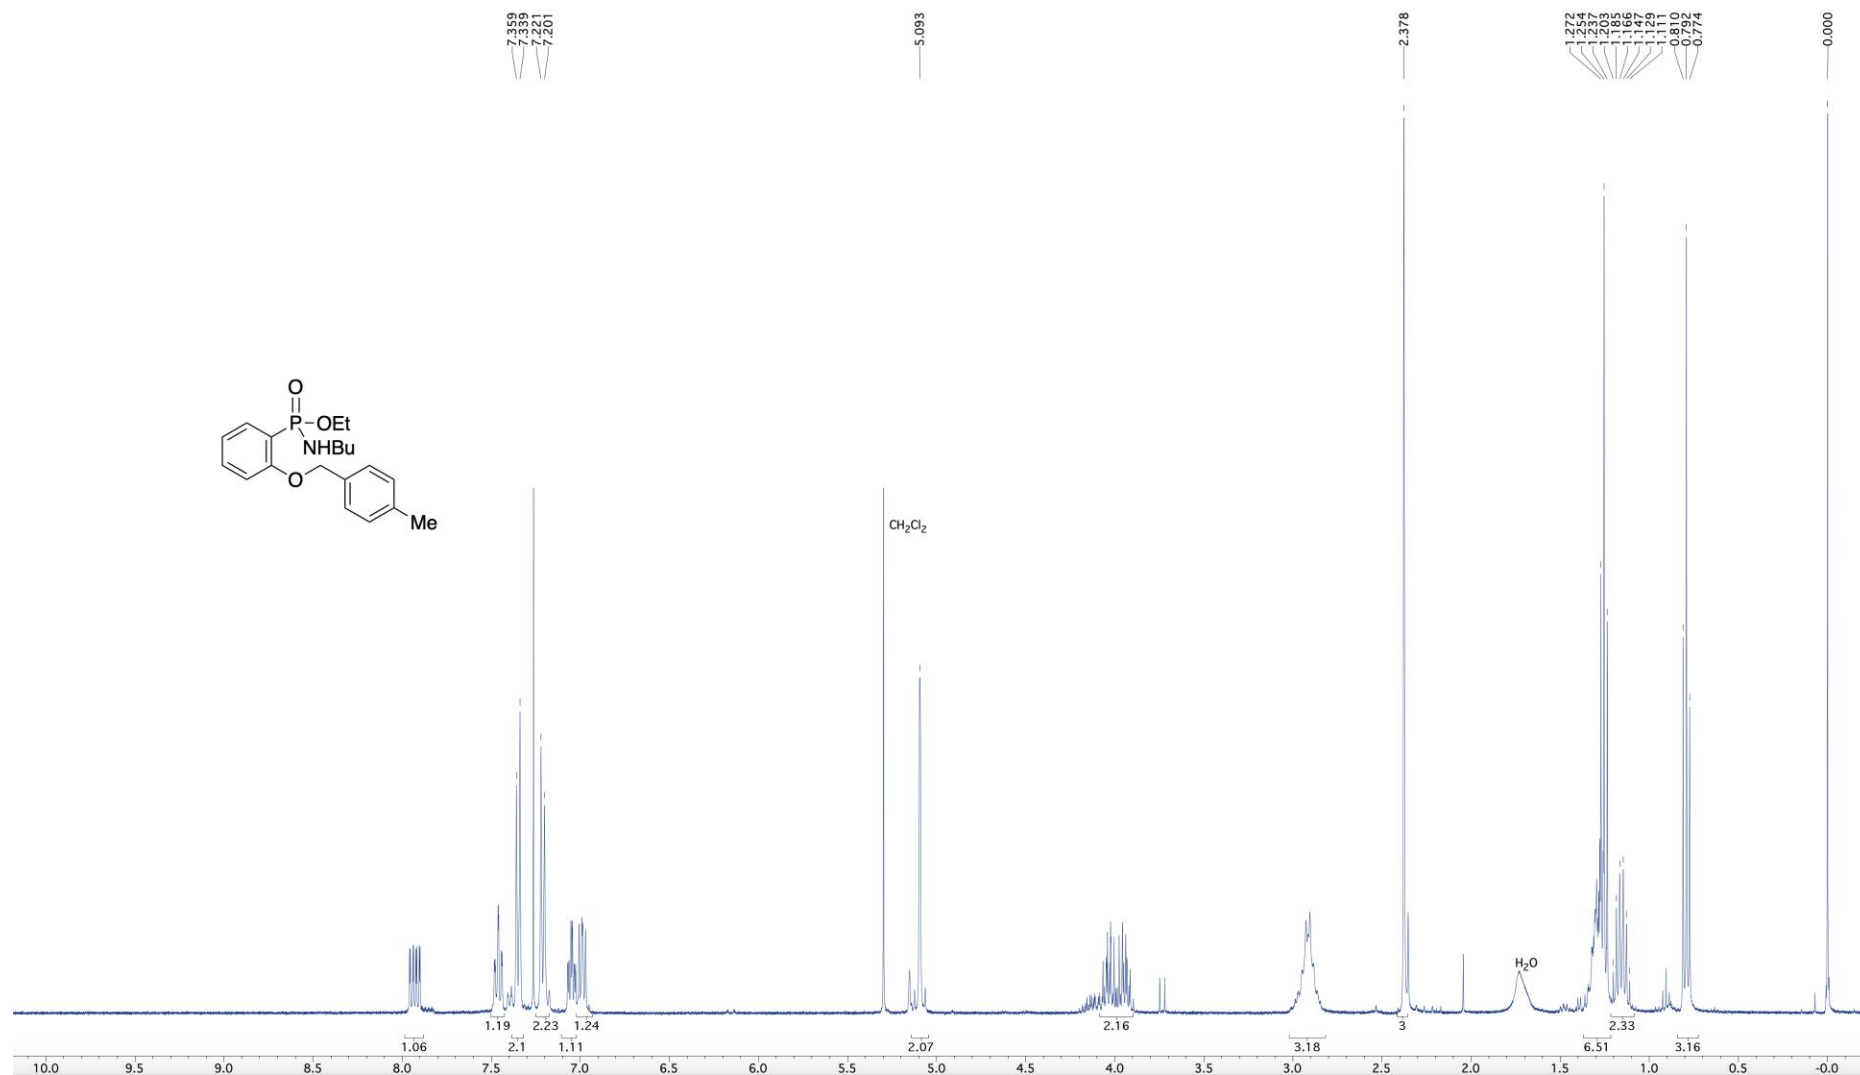

Figure S52. 162 MHz  $^{31}\text{P}$  NMR spectrum of **21b**

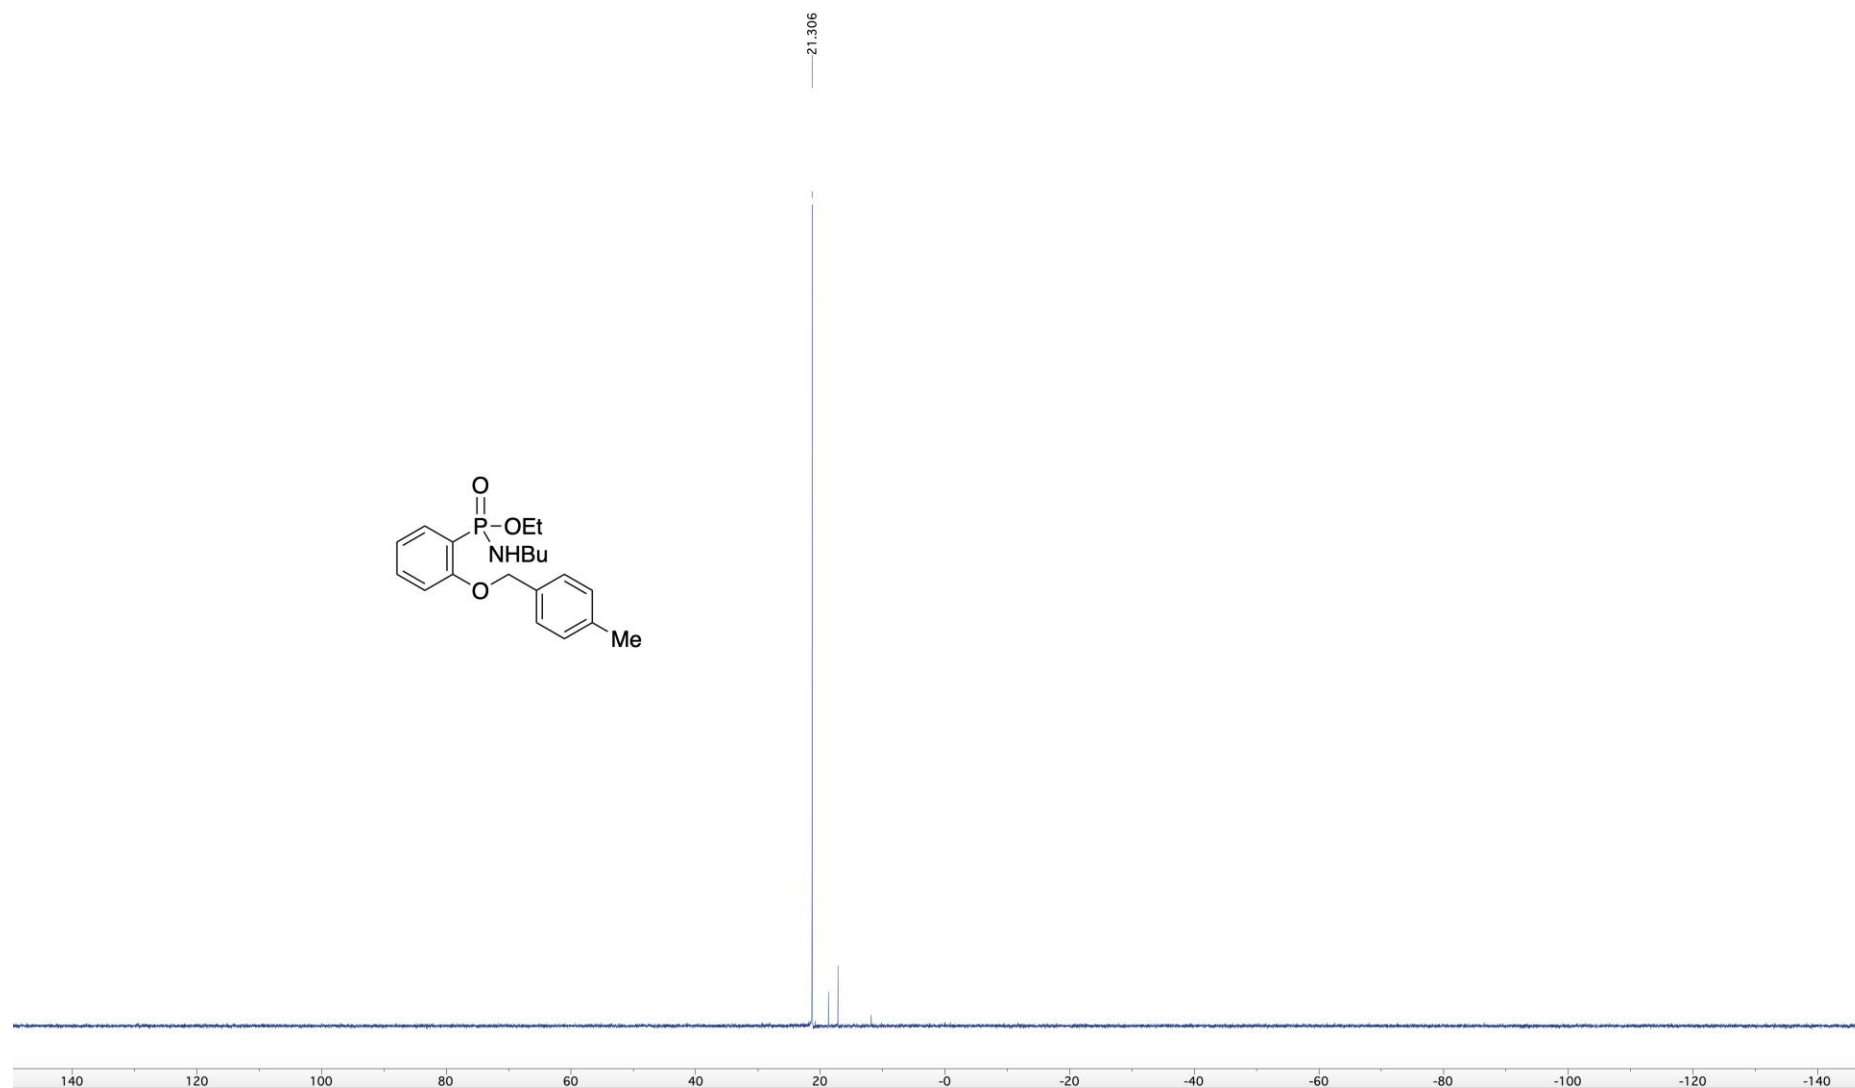

Figure S53. 100 MHz DEPTQ  $^{13}\text{C}$  NMR spectrum of **21b**

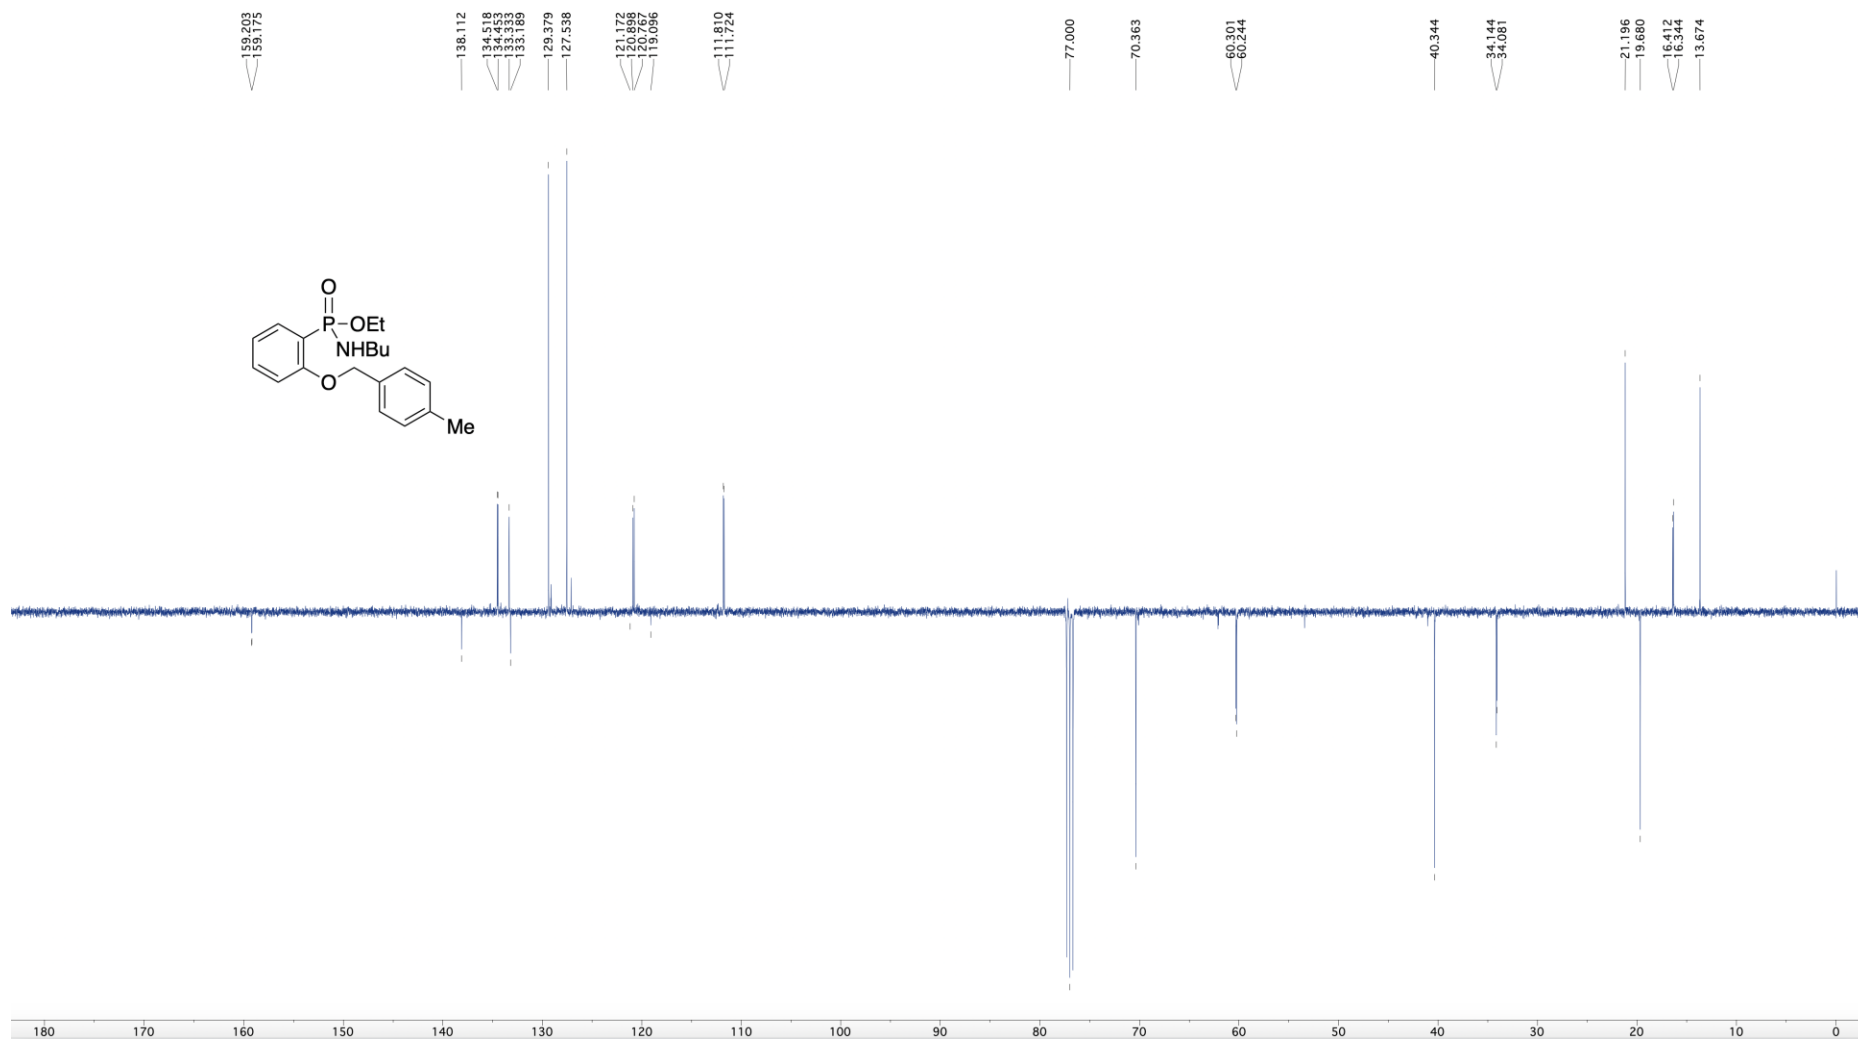

Figure S54. 400 MHz  $^1\text{H}$  NMR spectrum of **21c**

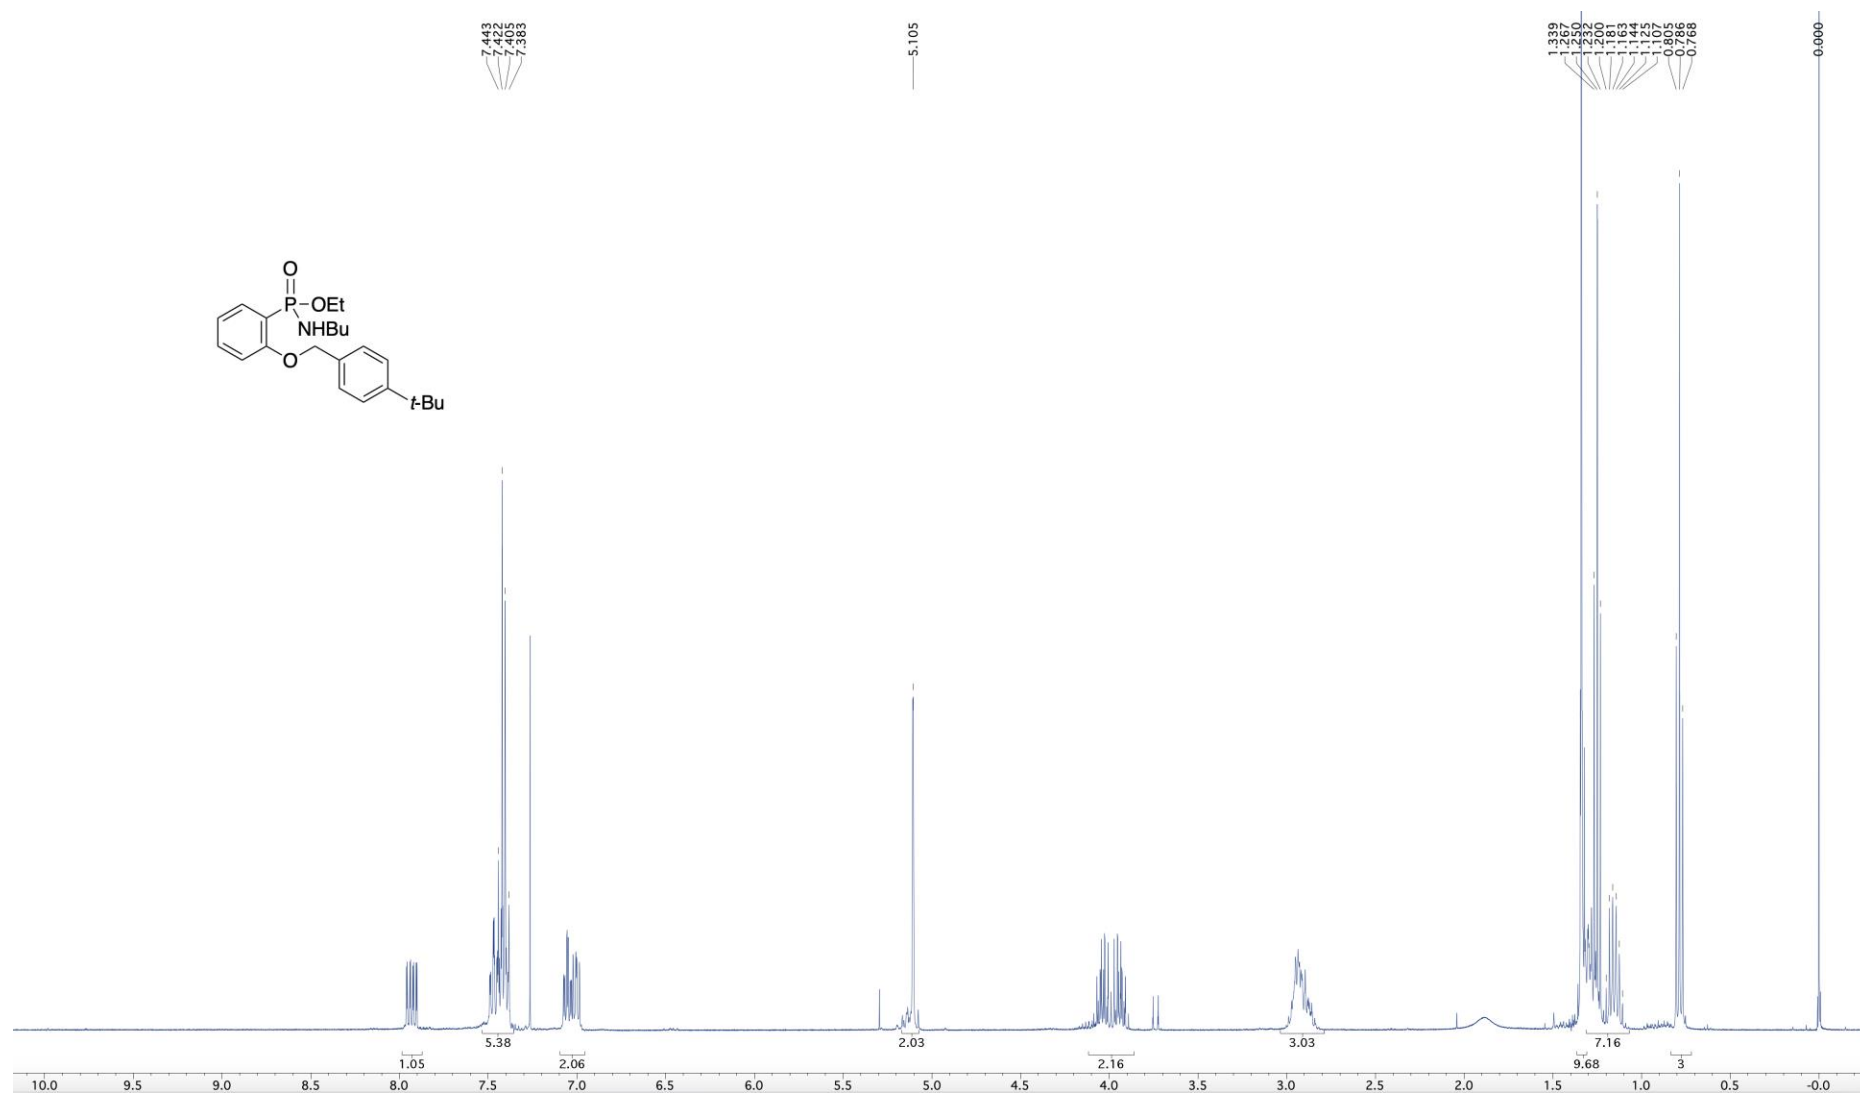

Figure S55. 162 MHz  $^{31}\text{P}$  NMR spectrum of **21c**

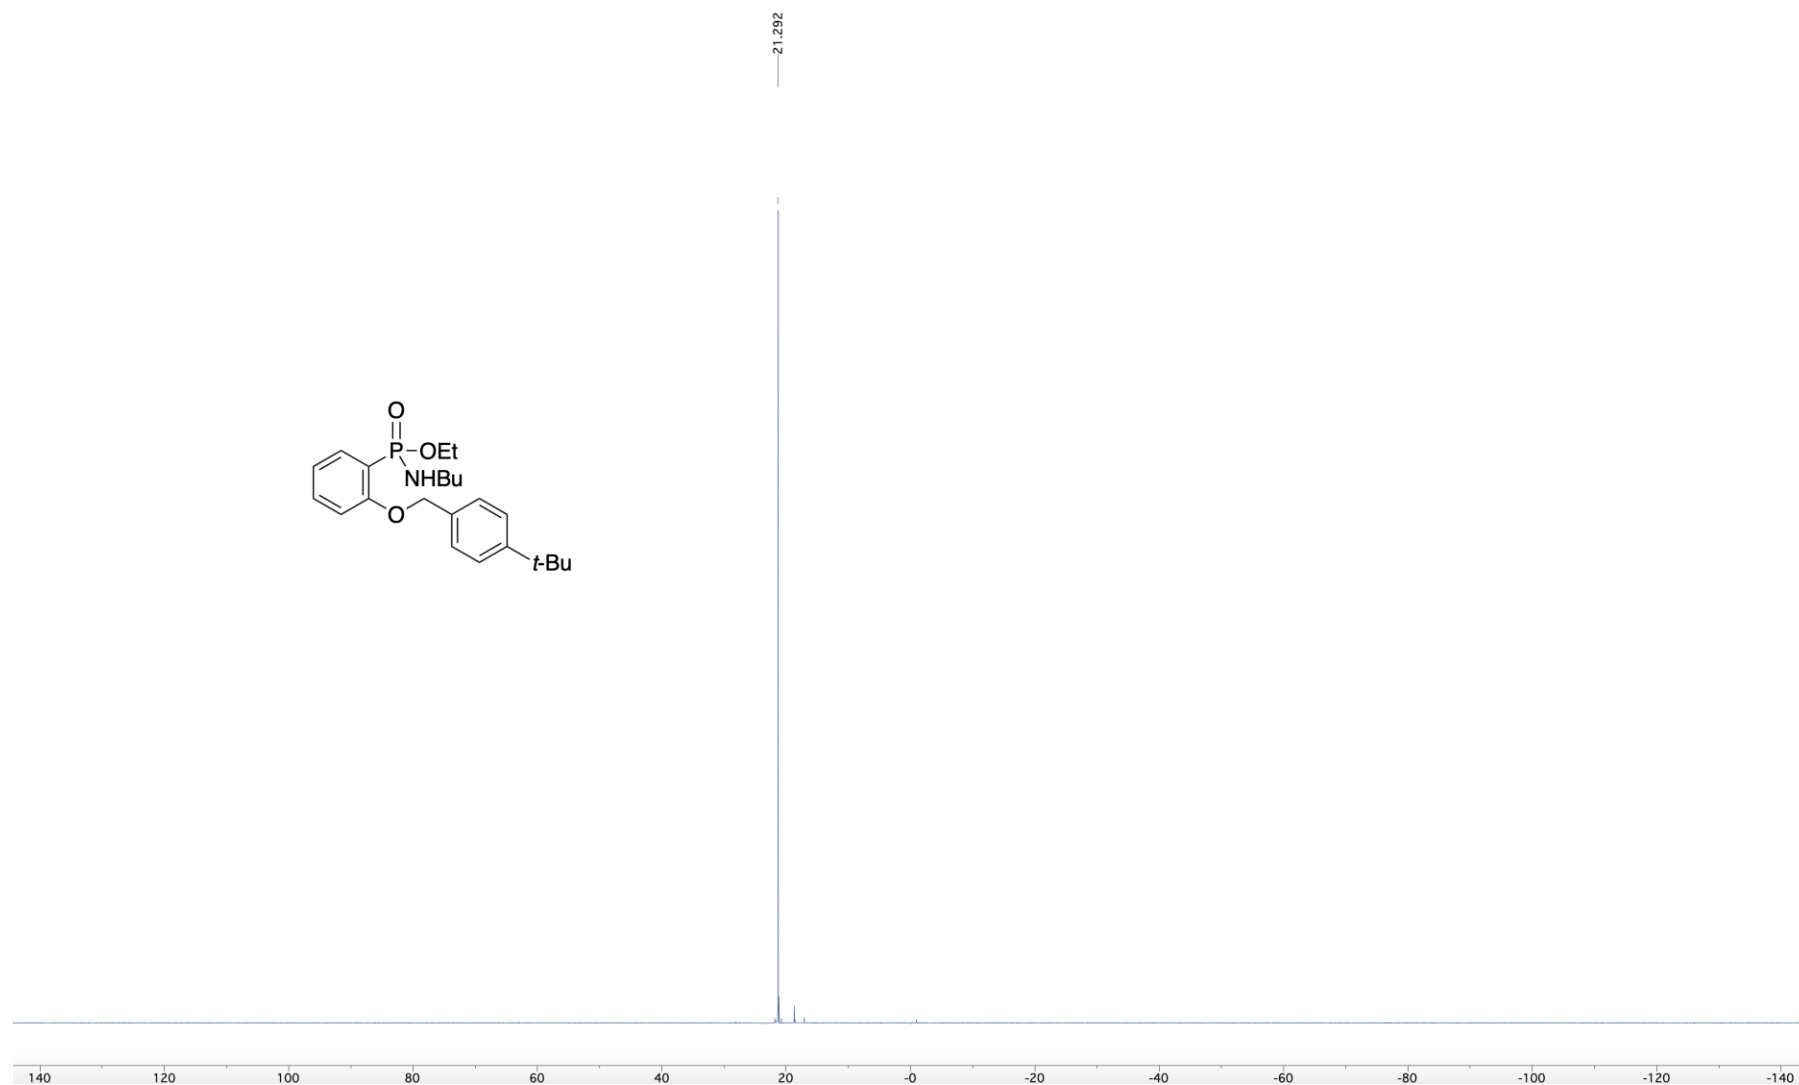

Figure S56. 100 MHz DEPTQ  $^{13}\text{C}$  NMR spectrum of **21c**

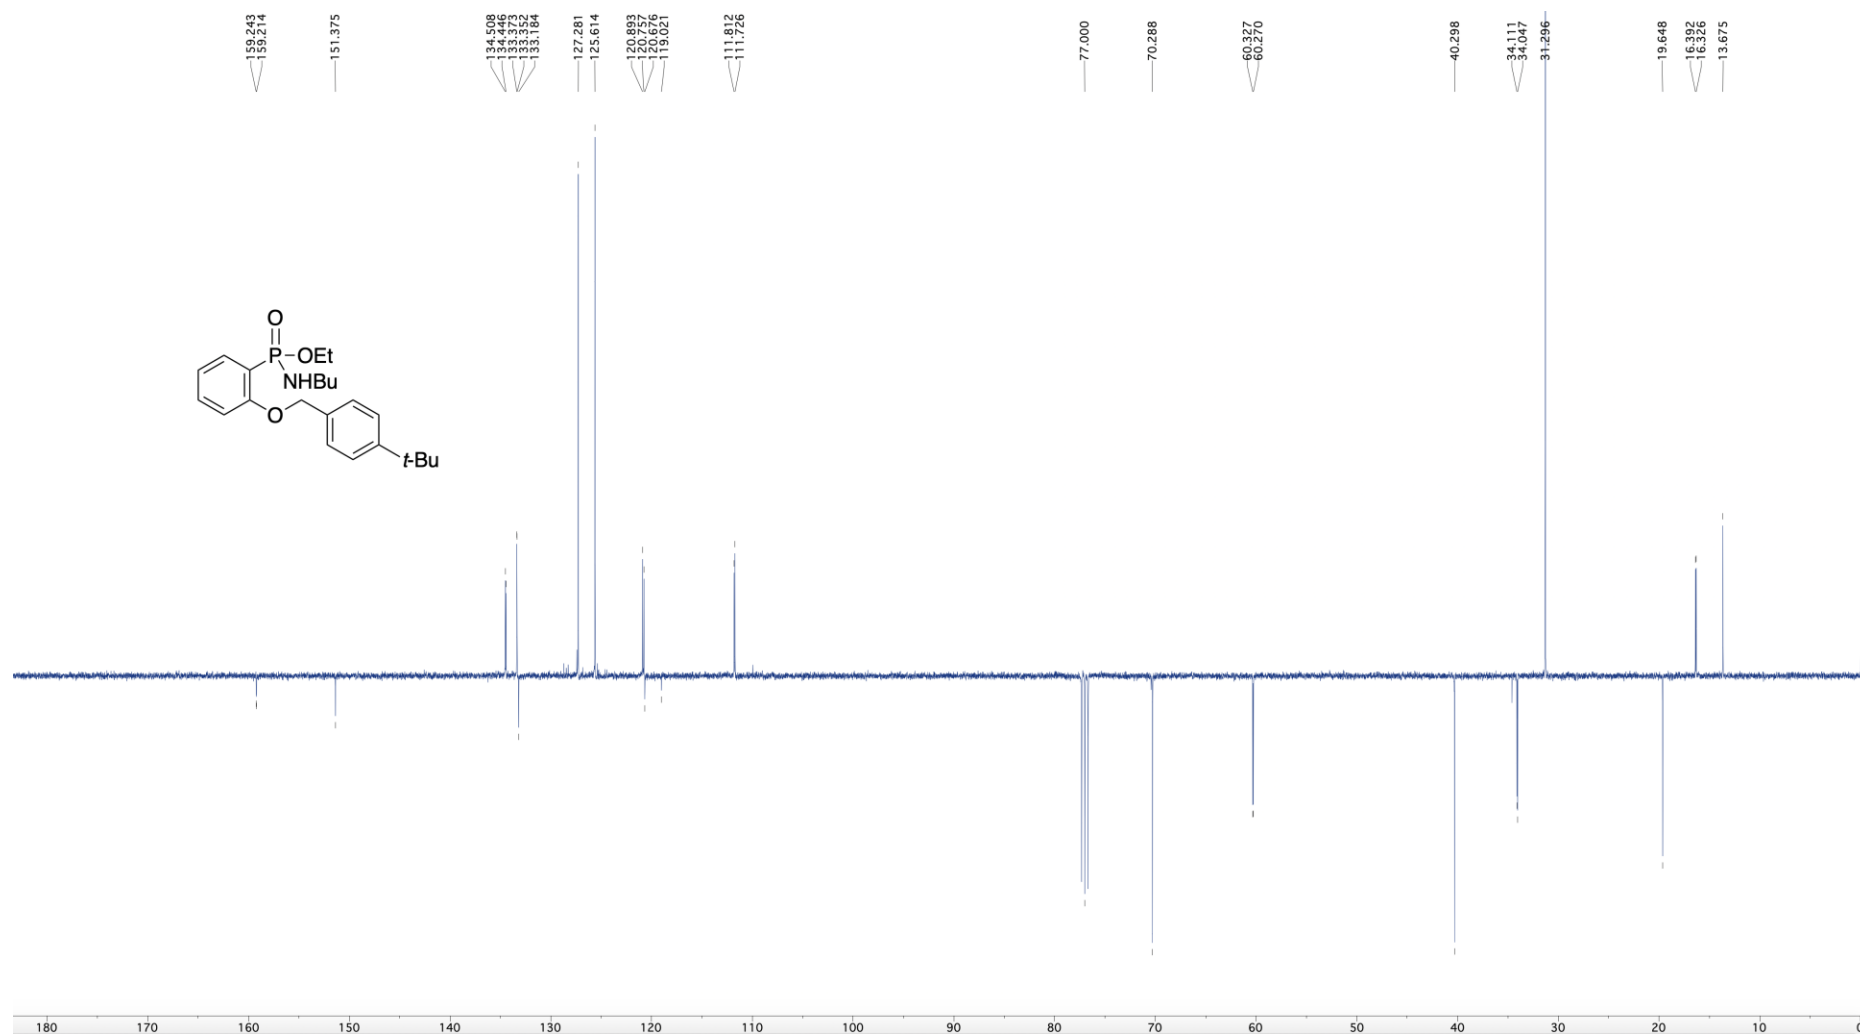

Figure S57. 400 MHz  $^1\text{H}$  NMR spectrum of **21d**

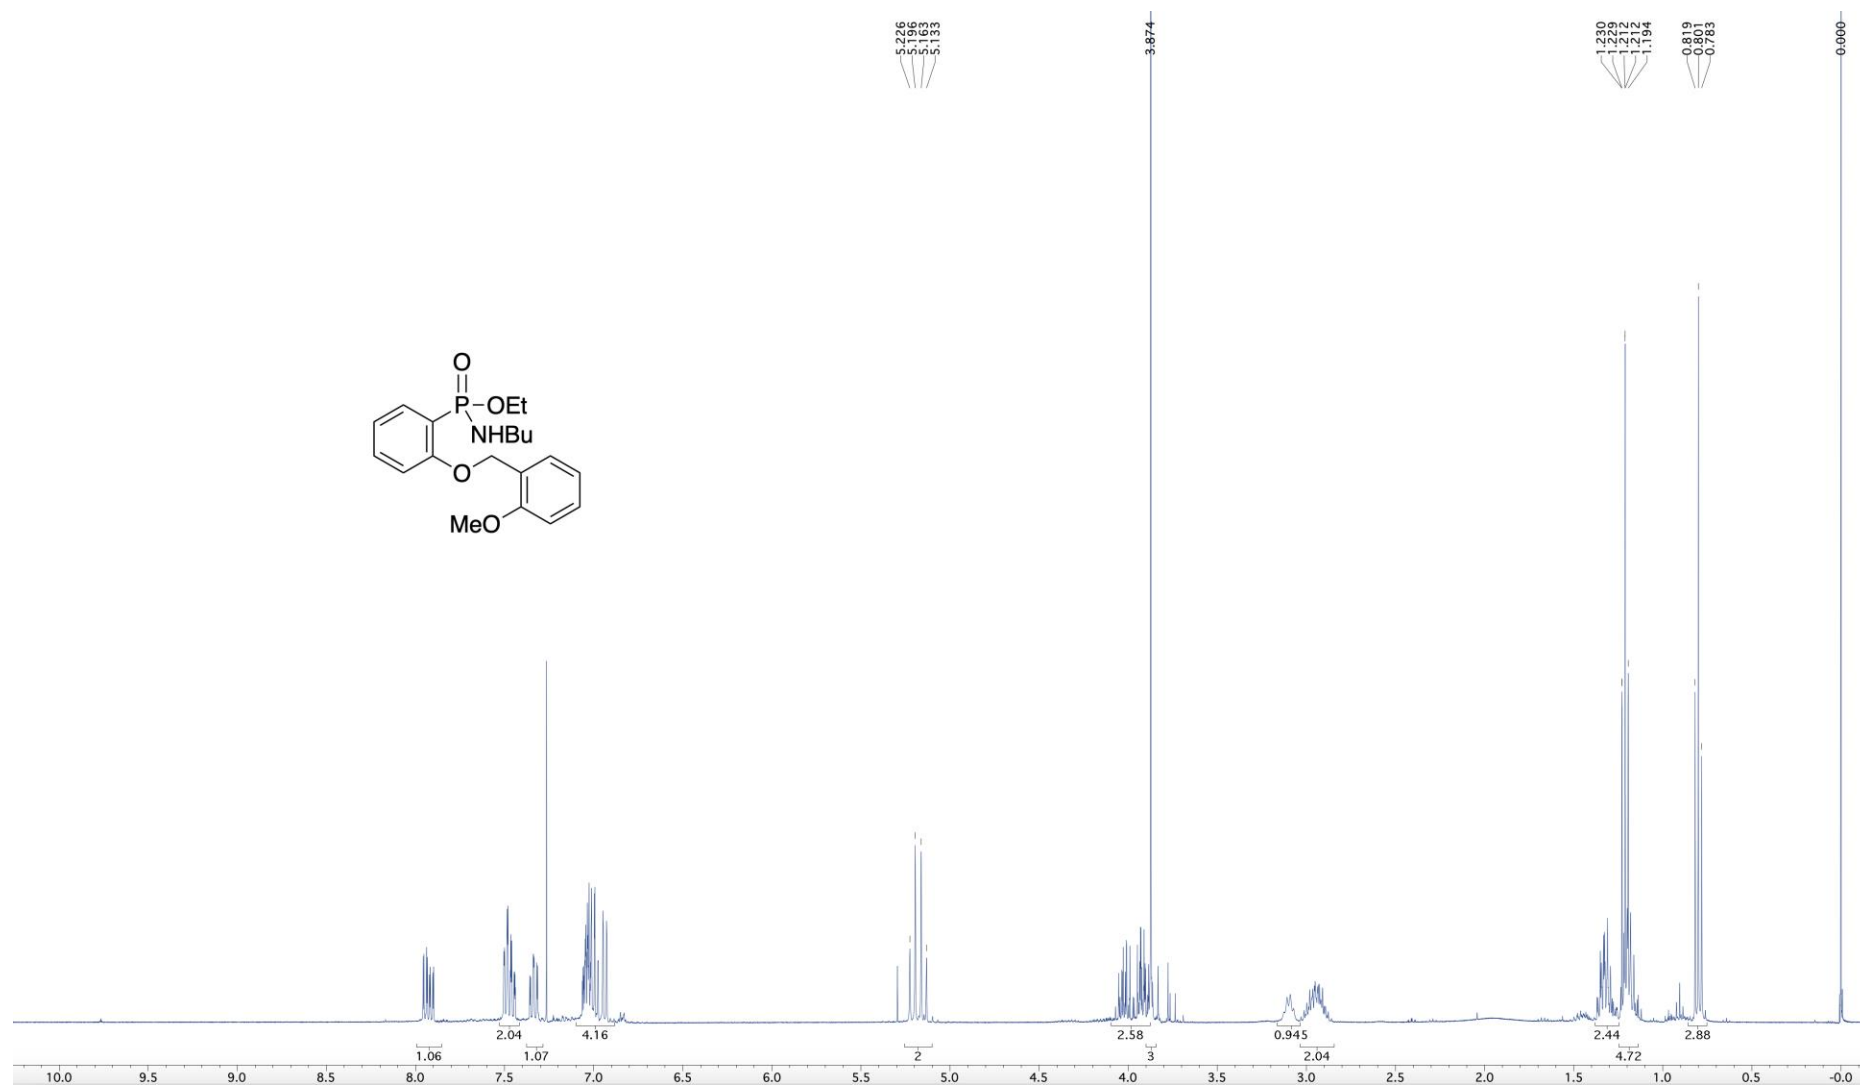



Figure S58. 162 MHz  $^{31}\text{P}$  NMR spectrum of **21d**

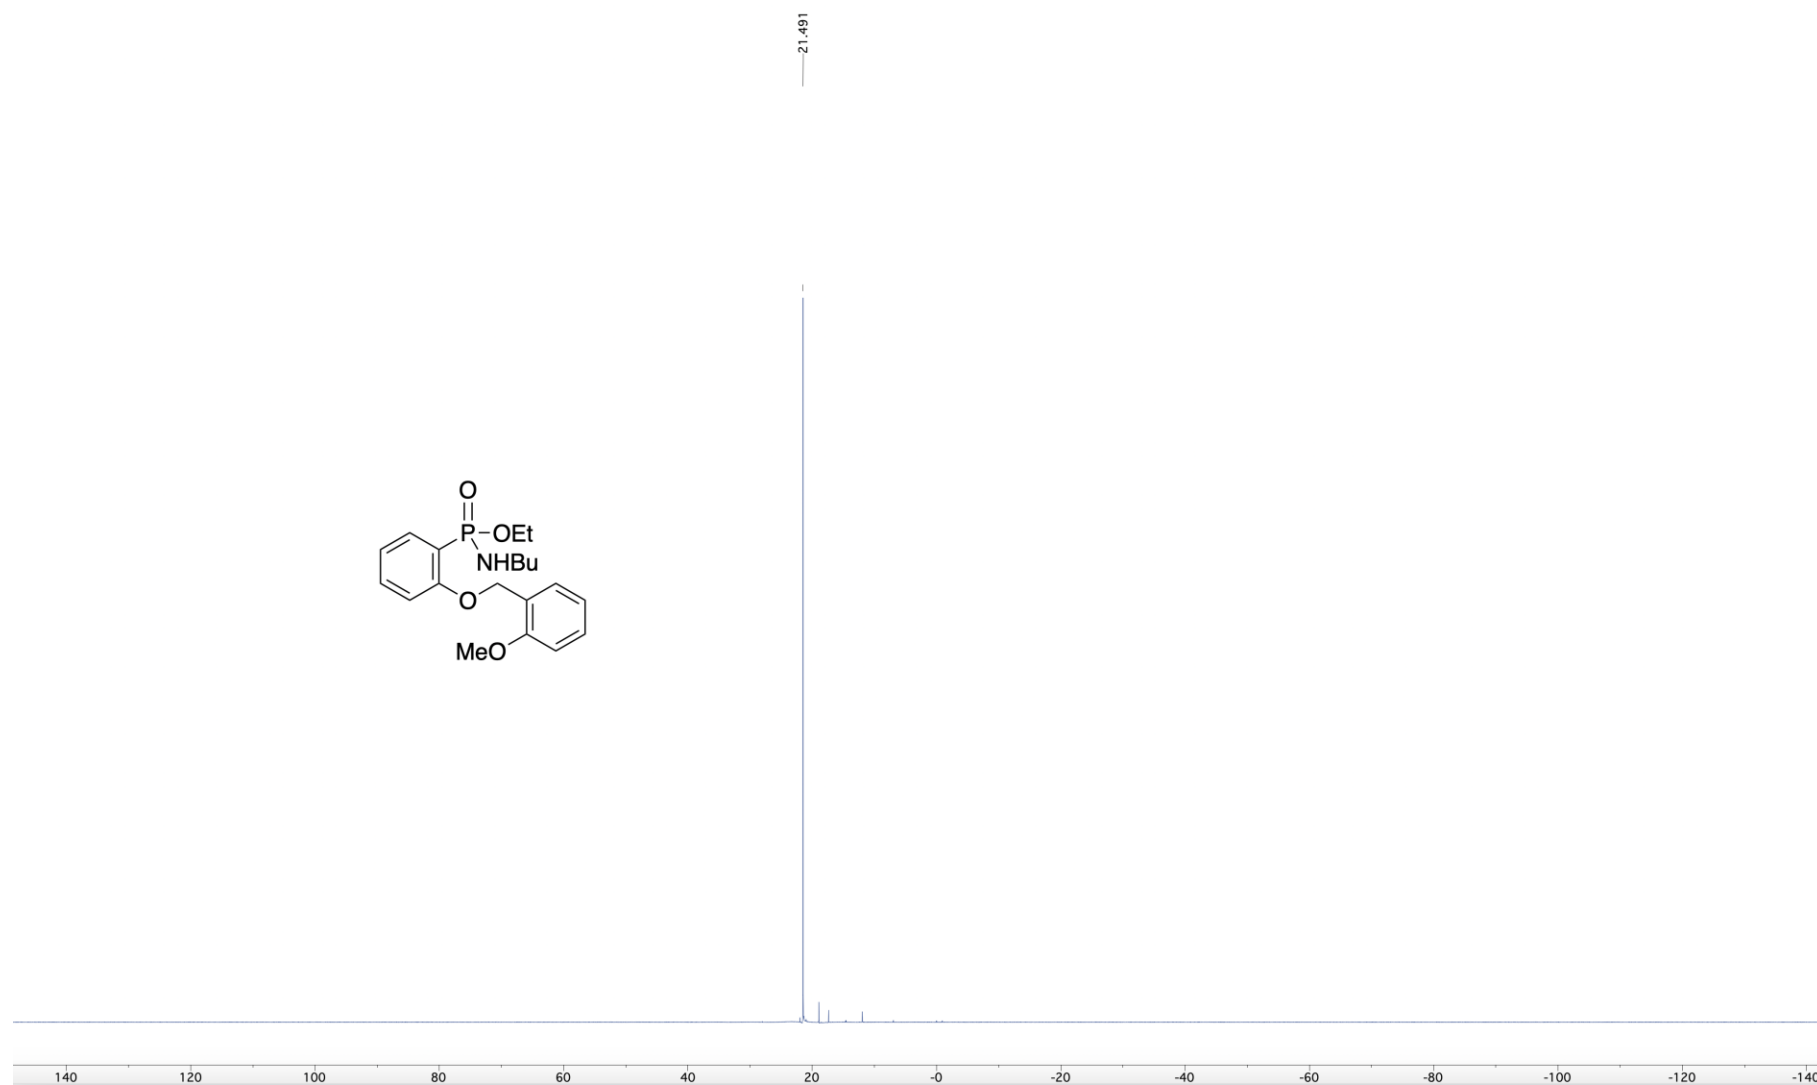

Figure S59. 100 MHz DEPTQ  $^{13}\text{C}$  NMR spectrum of **21d**

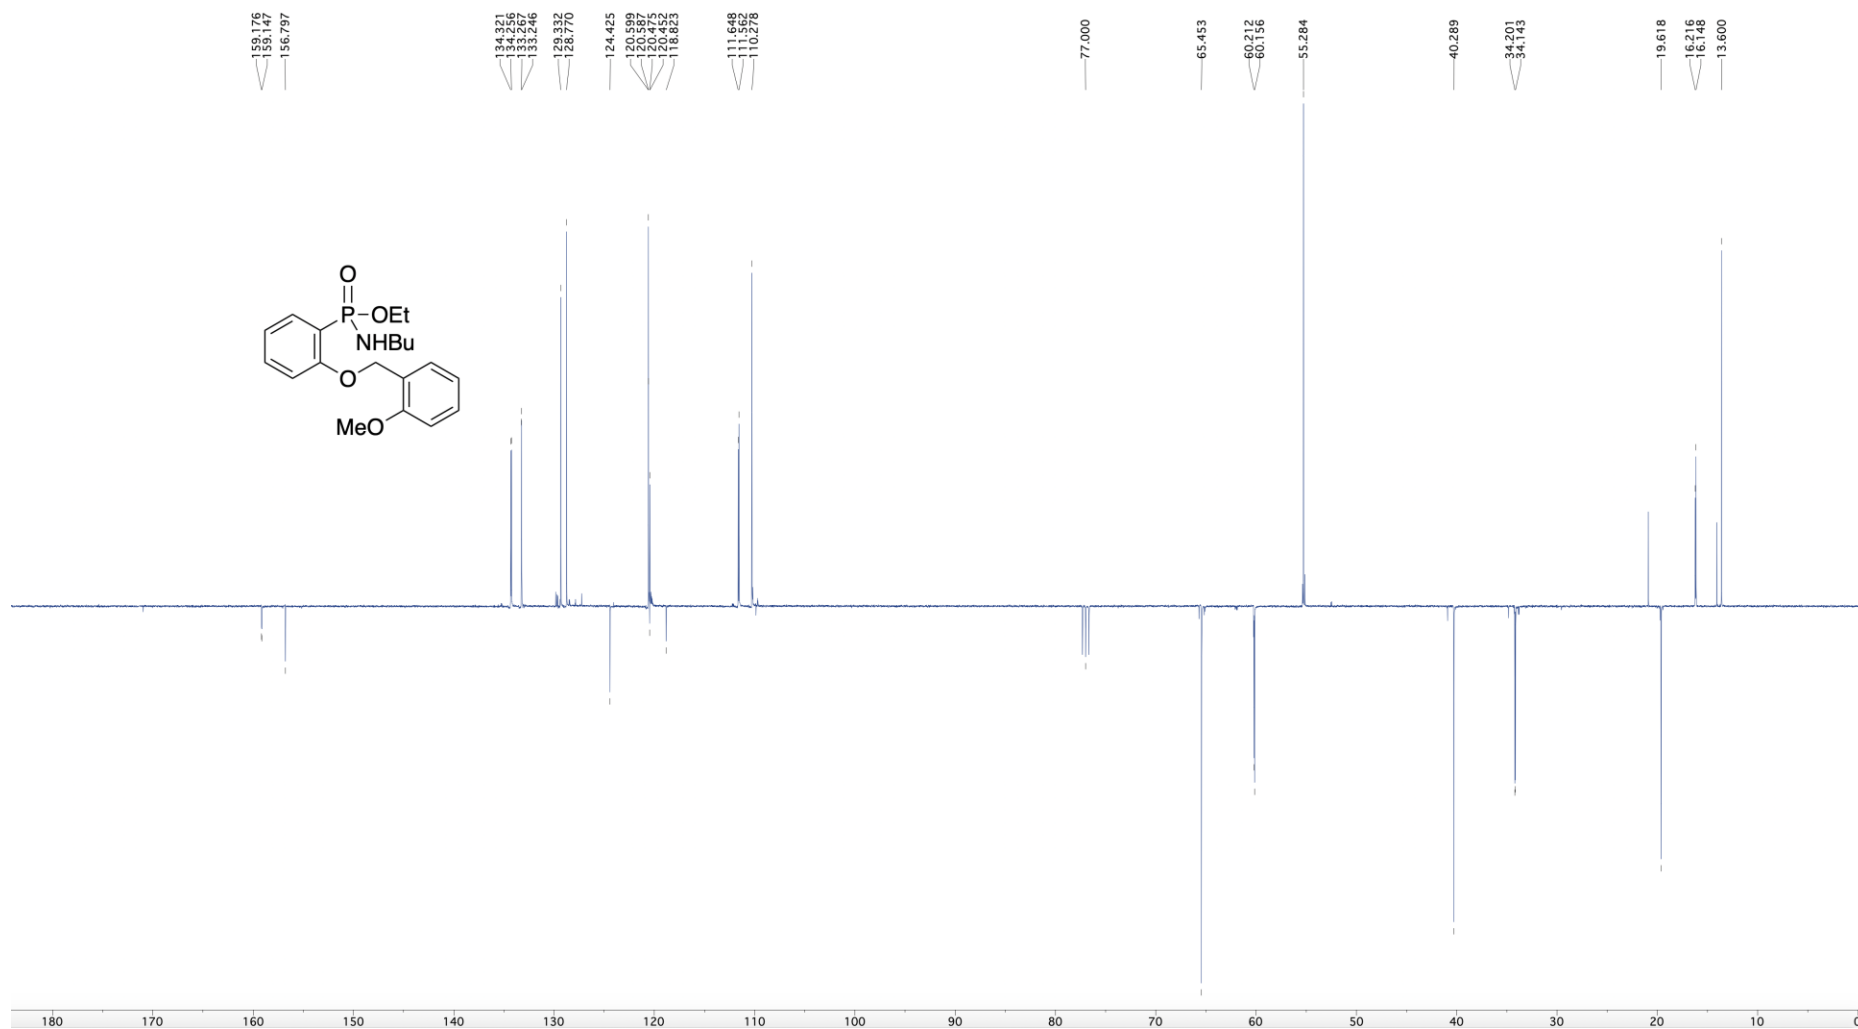

Figure S60. 400 MHz  $^1\text{H}$  NMR spectrum of **21e**

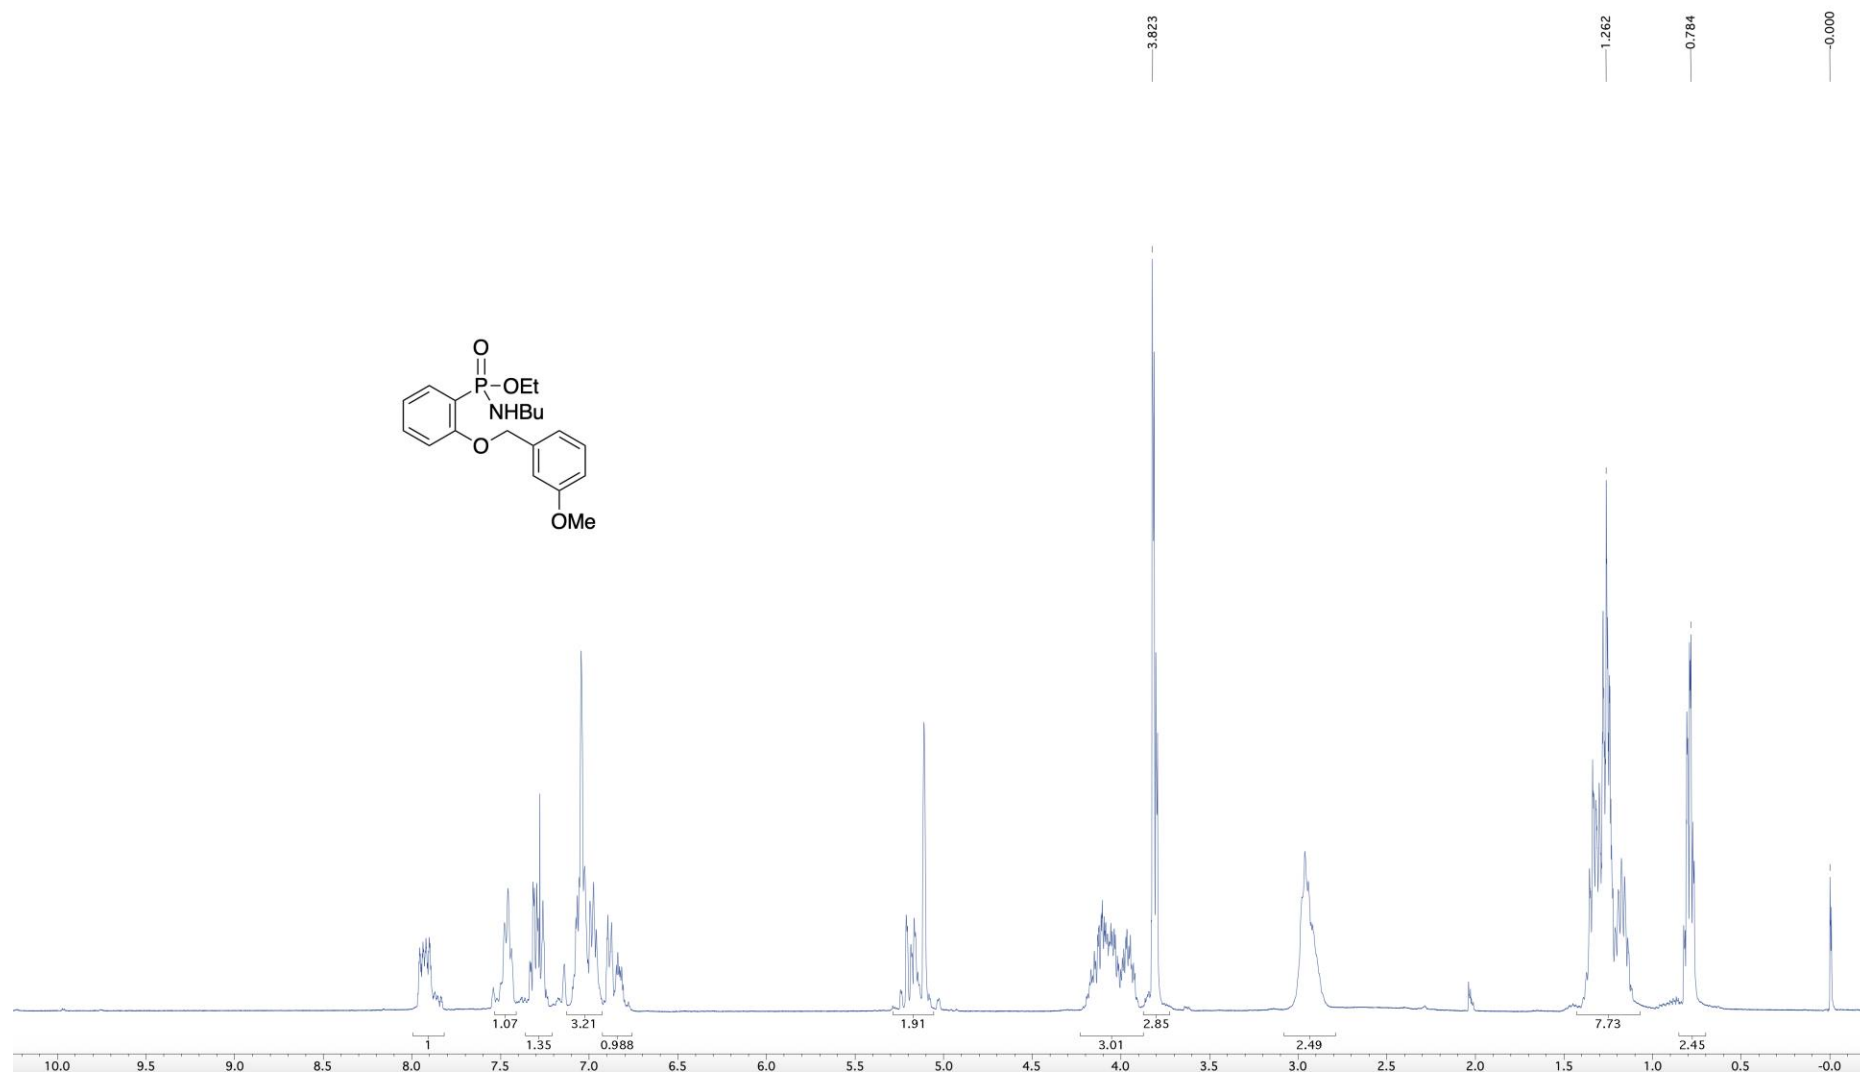

Figure S61. 121 MHz  $^{31}\text{P}$  NMR spectrum of **21e**

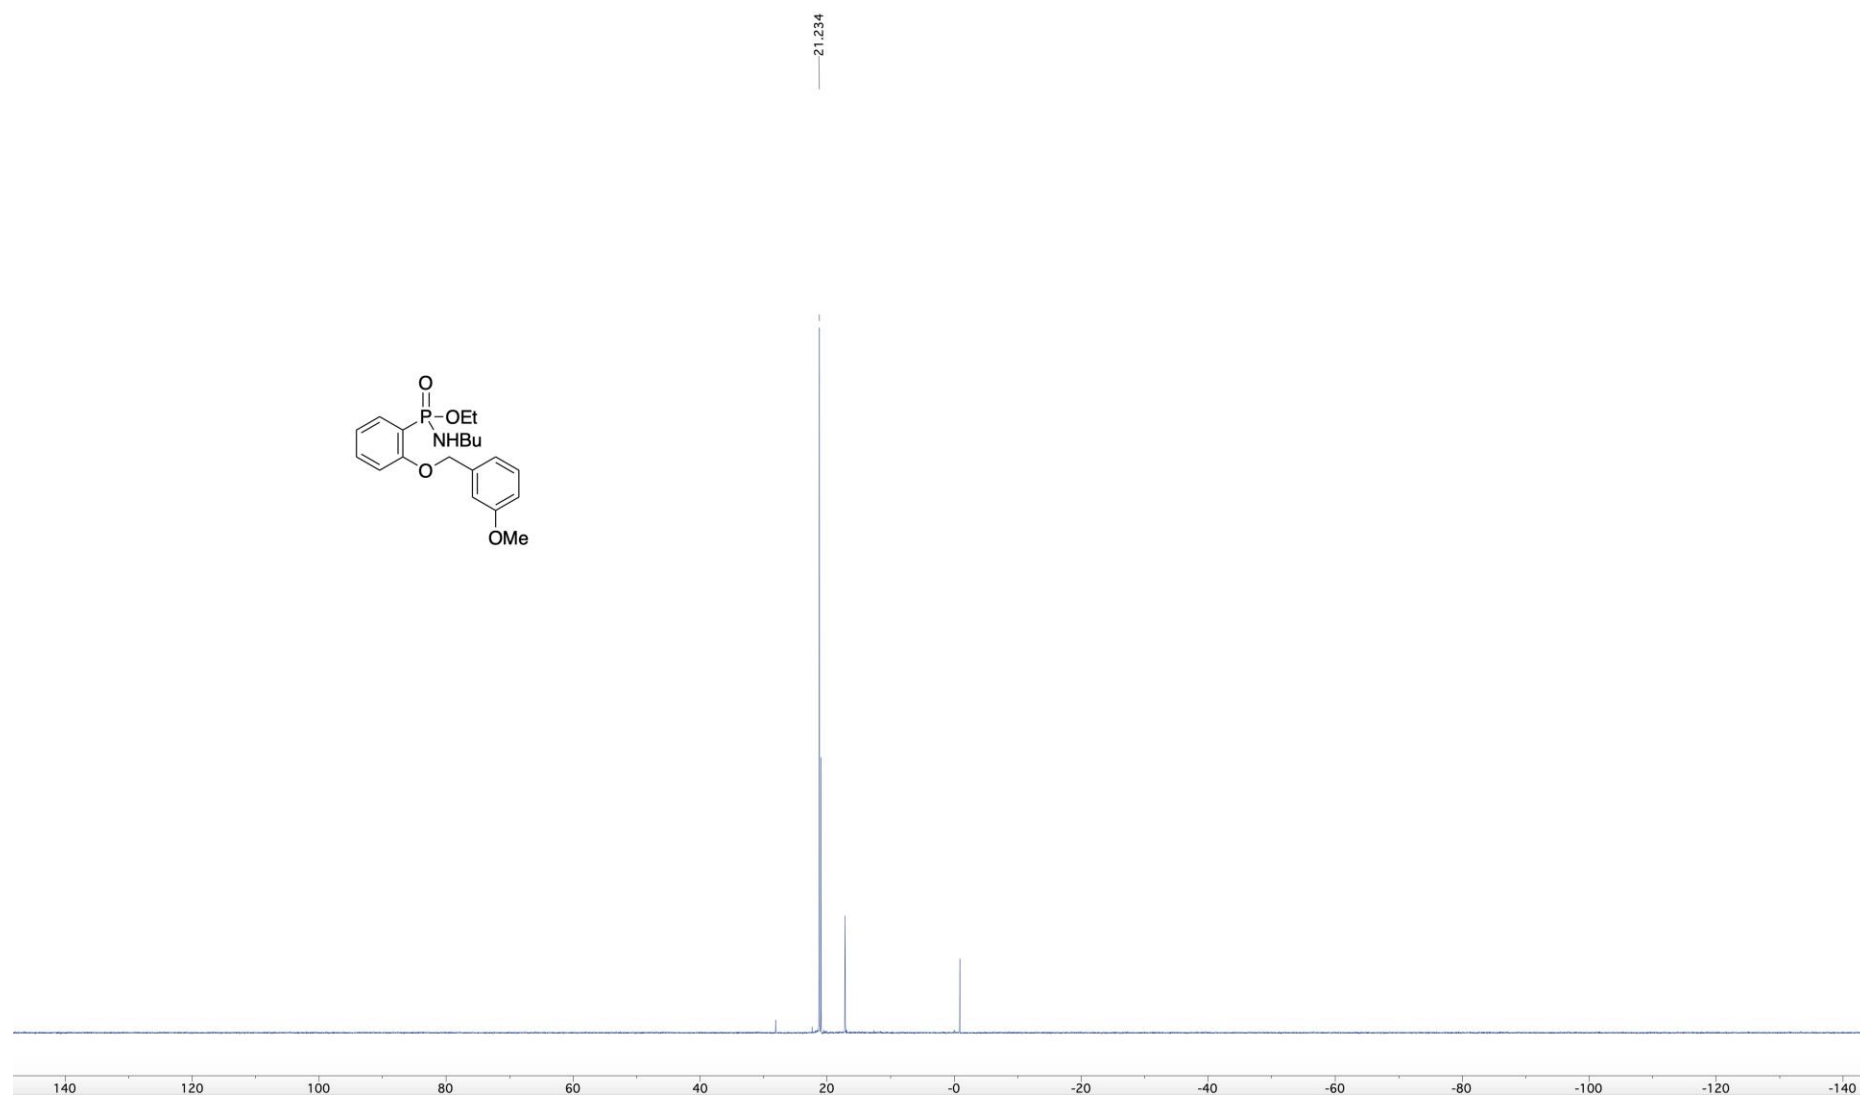

Figure S62. 400 MHz  $^1\text{H}$  NMR spectrum of **21f**

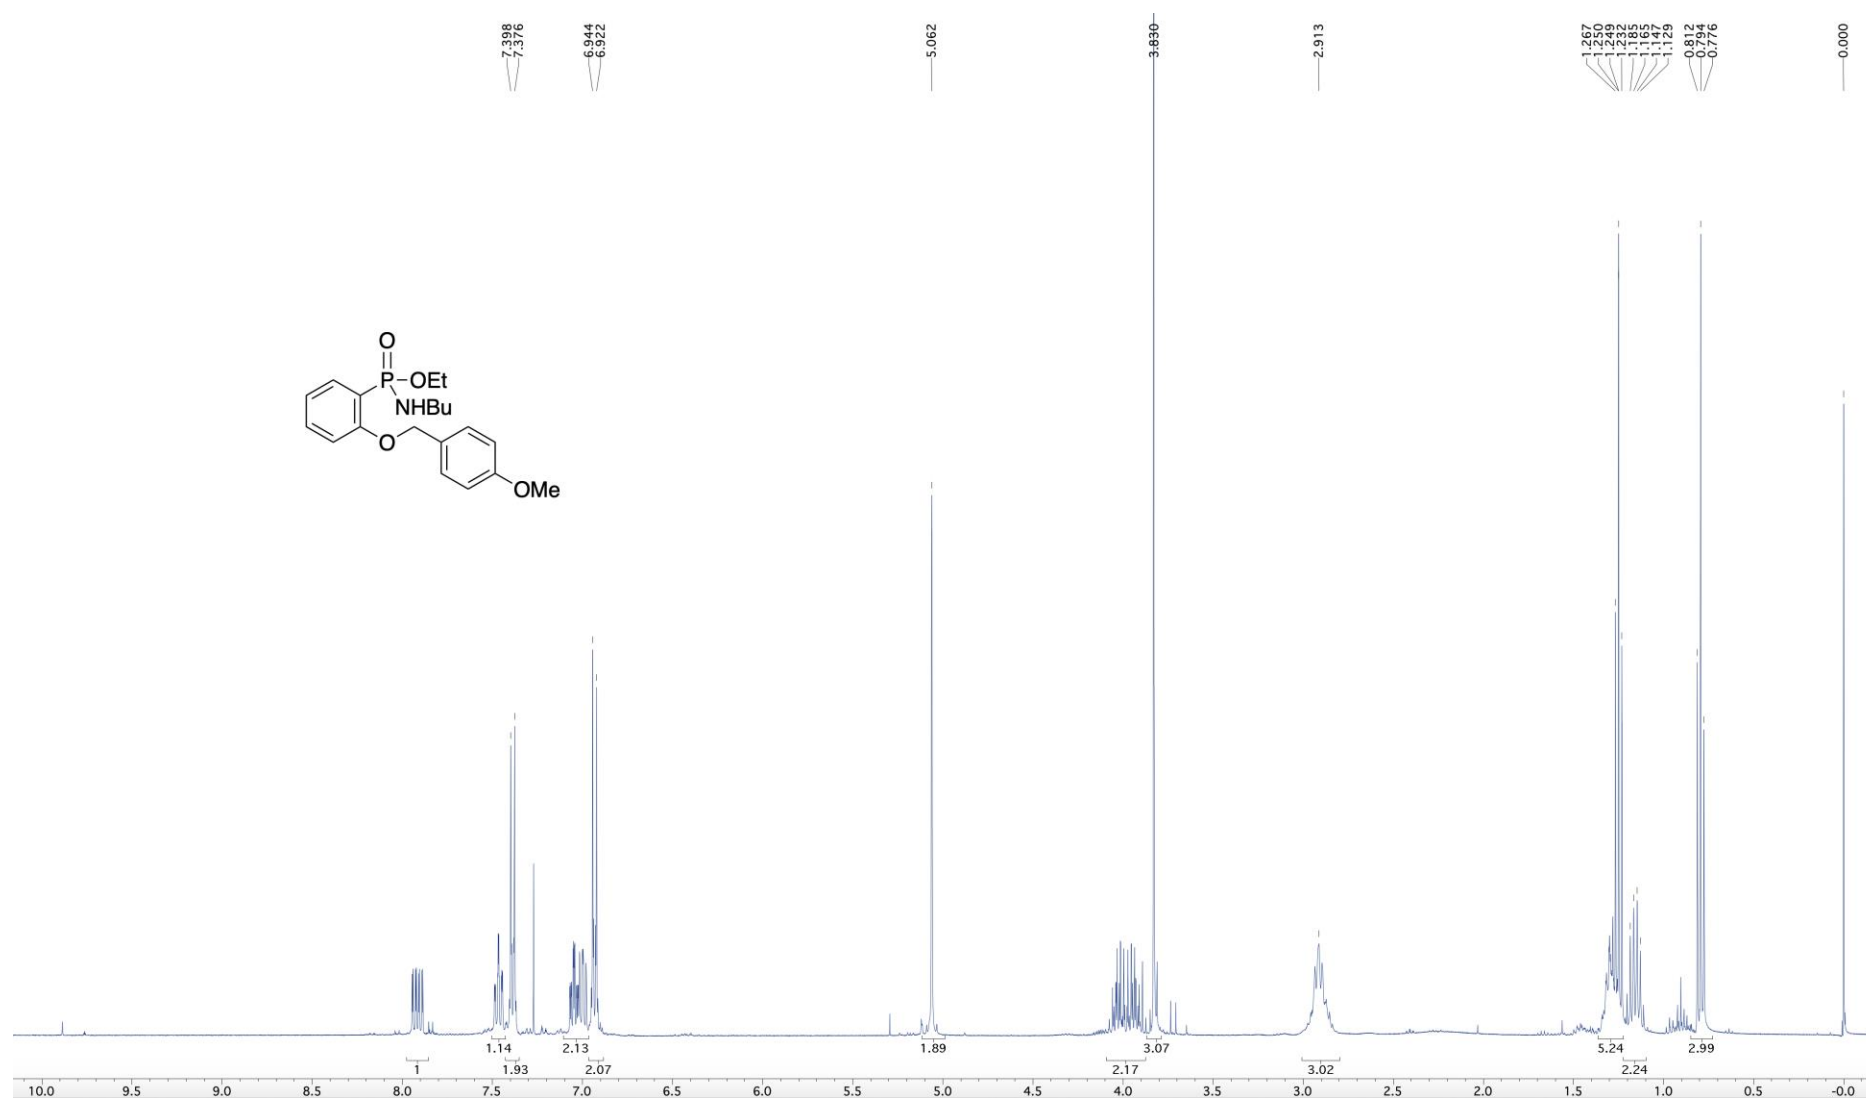

Figure S63. 162 MHz  $^{31}\text{P}$  NMR spectrum of **21f**

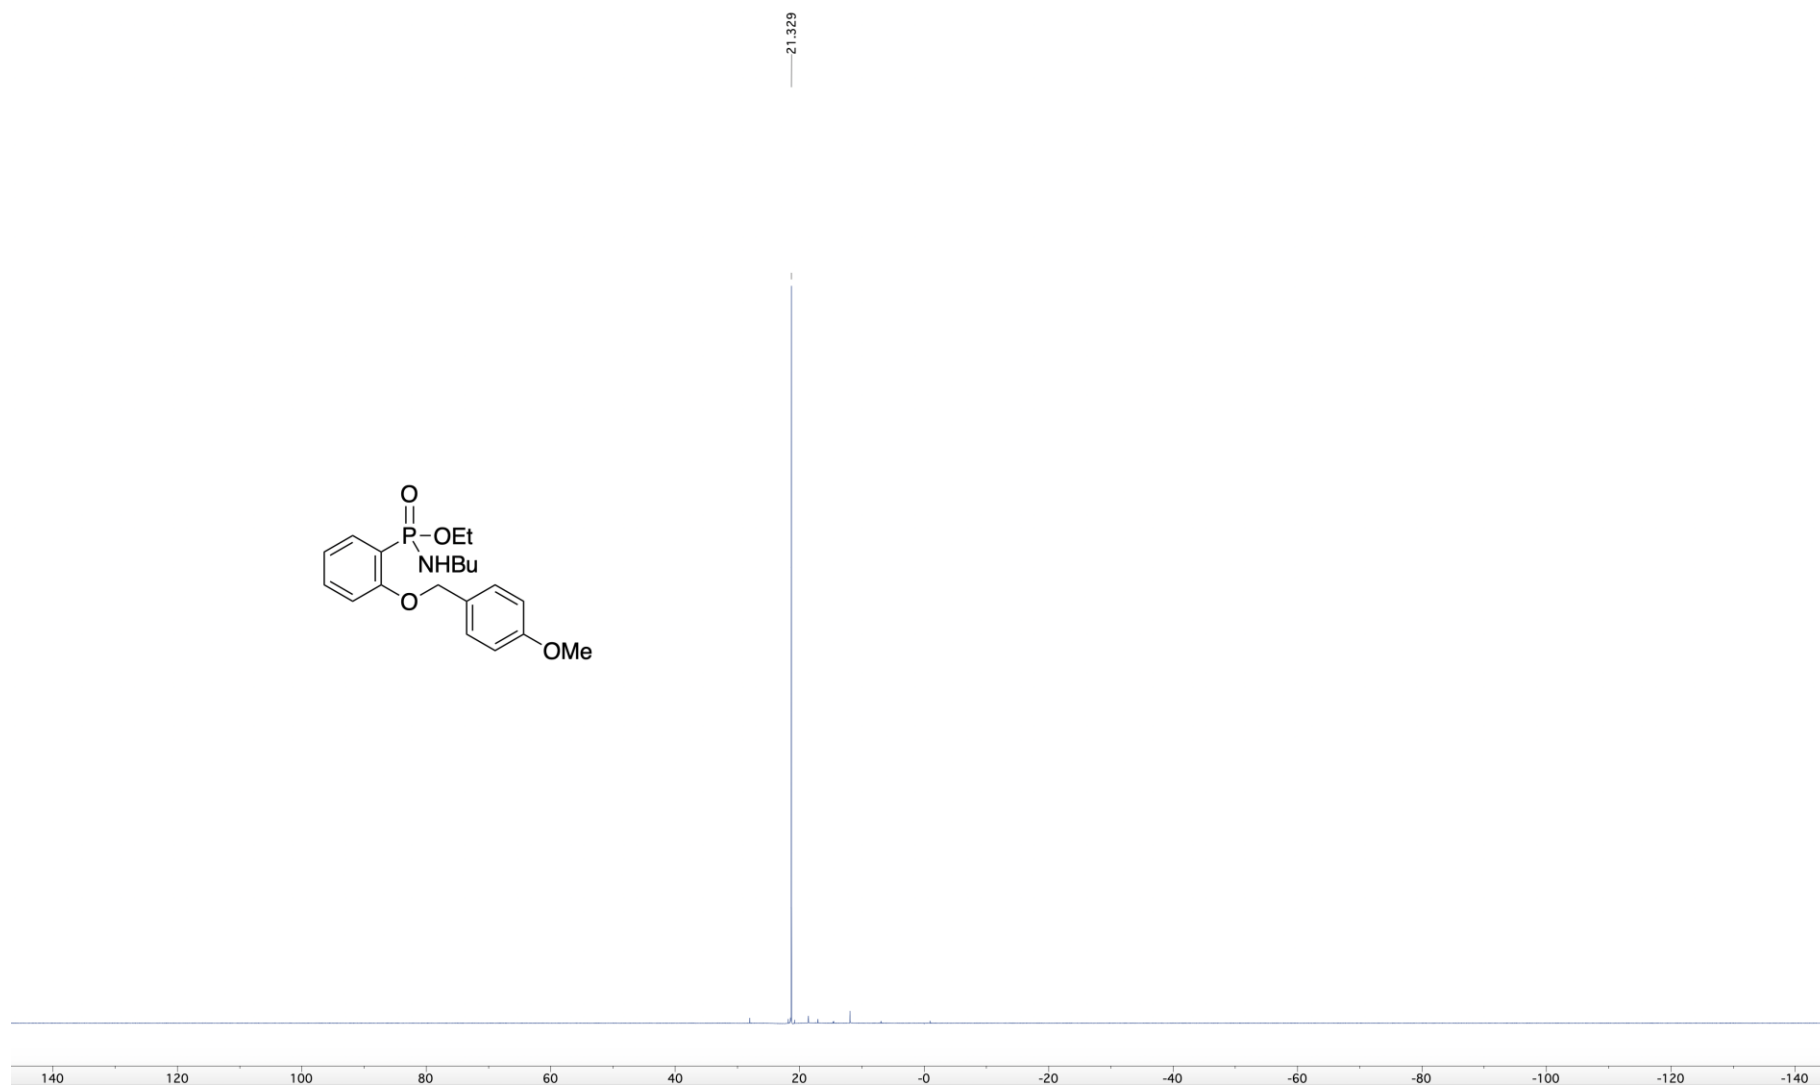

Figure S64. 100 MHz DEPTQ  $^{13}\text{C}$  NMR spectrum of **21f**

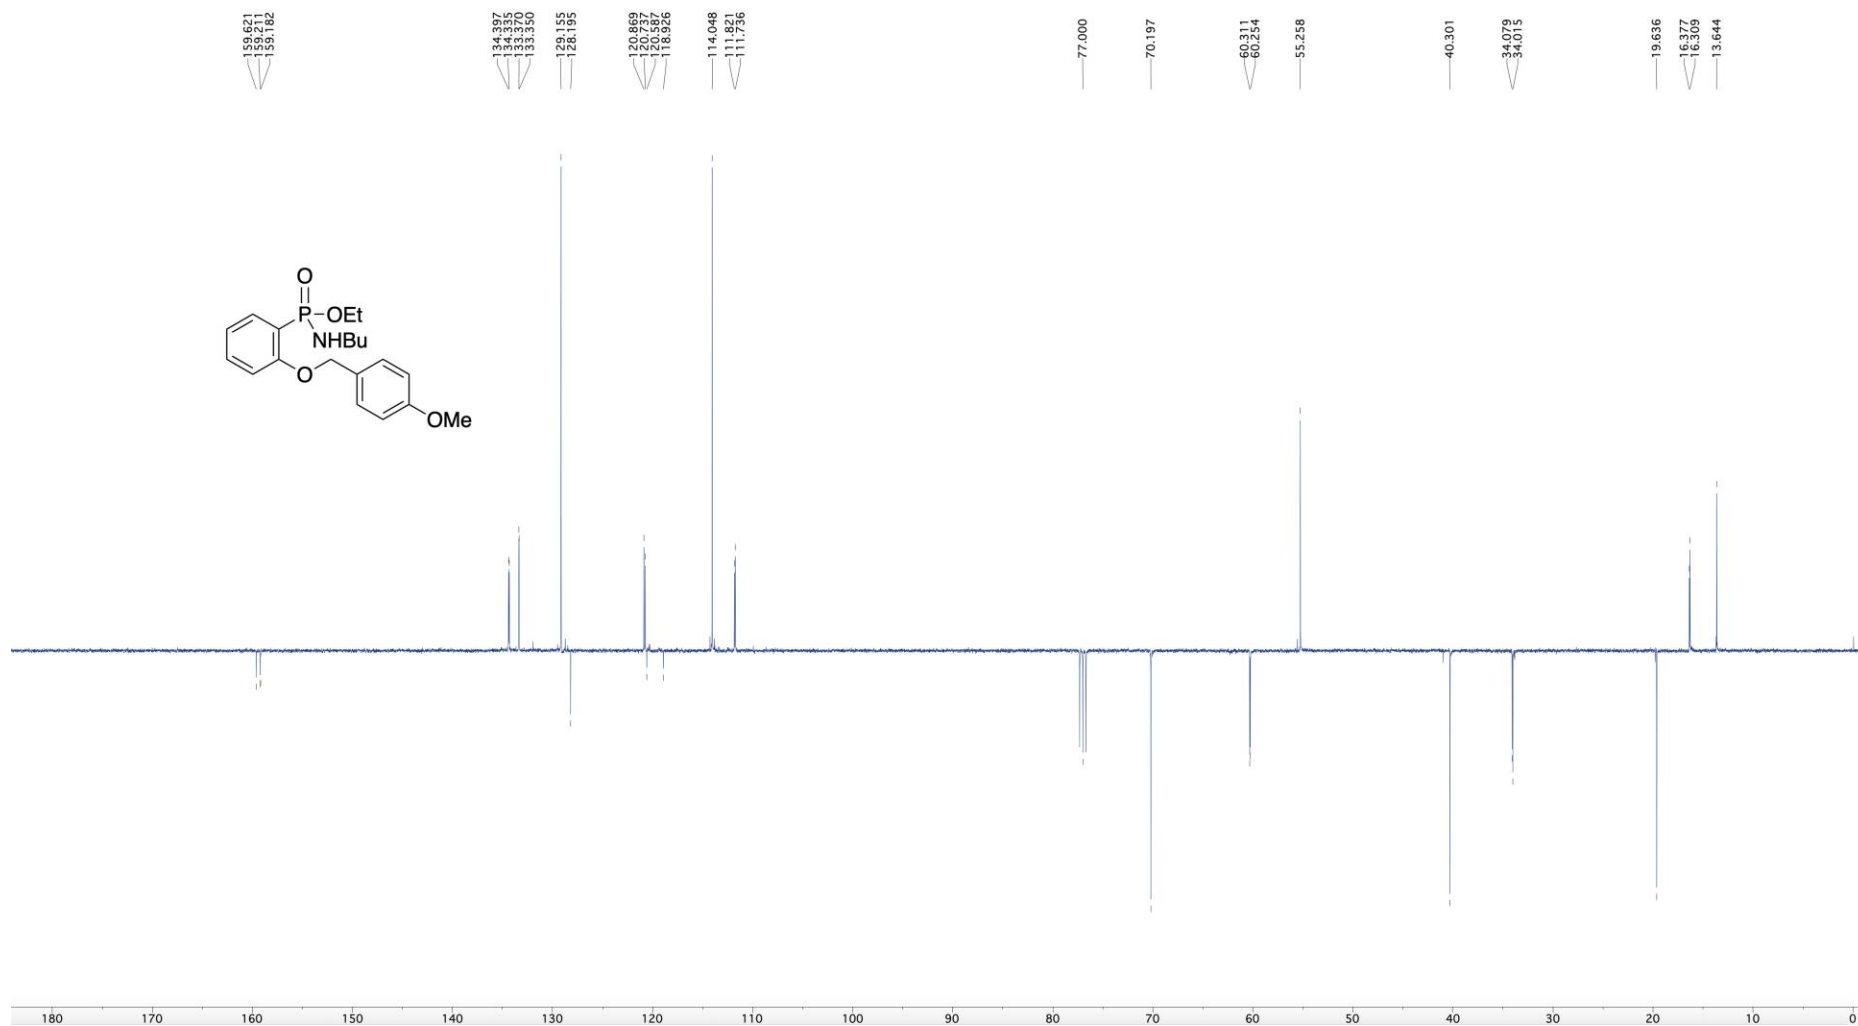

Figure S65. 400 MHz  $^1\text{H}$  NMR spectrum of **21g**

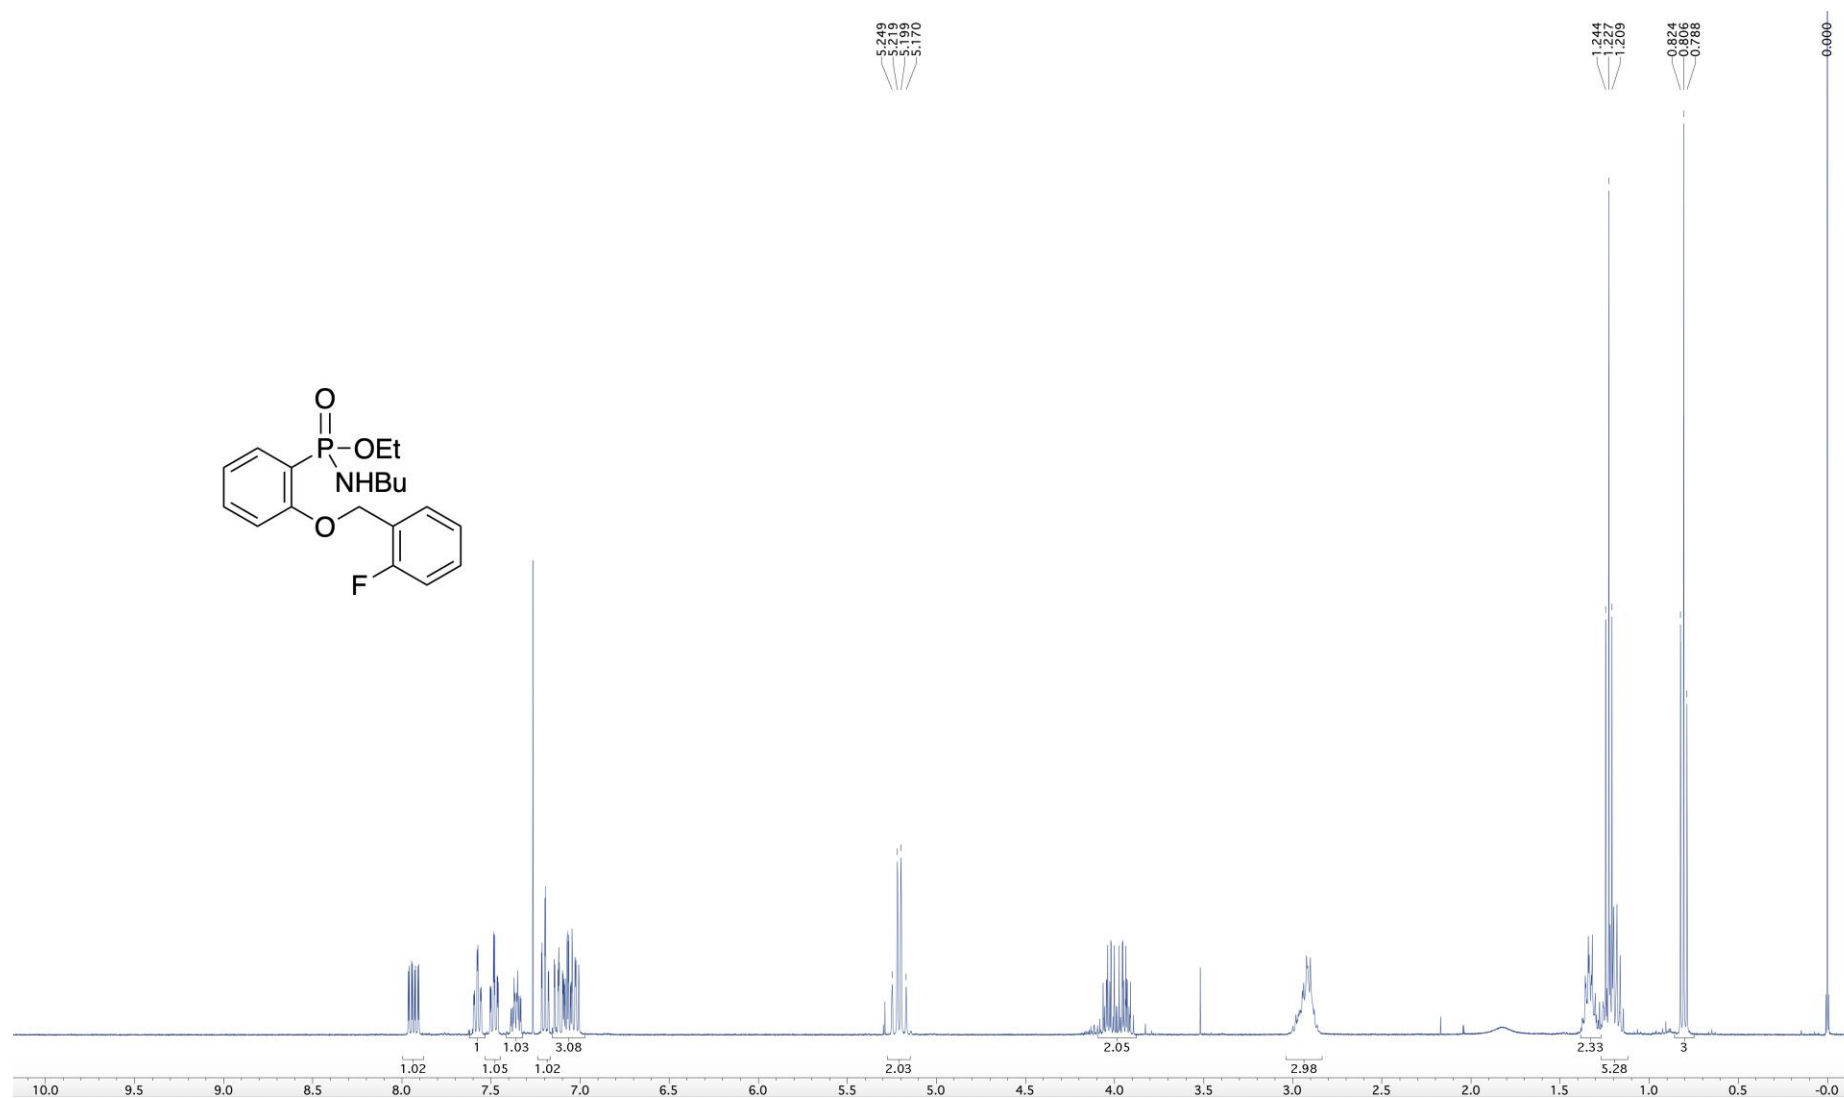



Figure S66. 376 MHz  $^{19}\text{F}$  NMR spectrum of **21g**

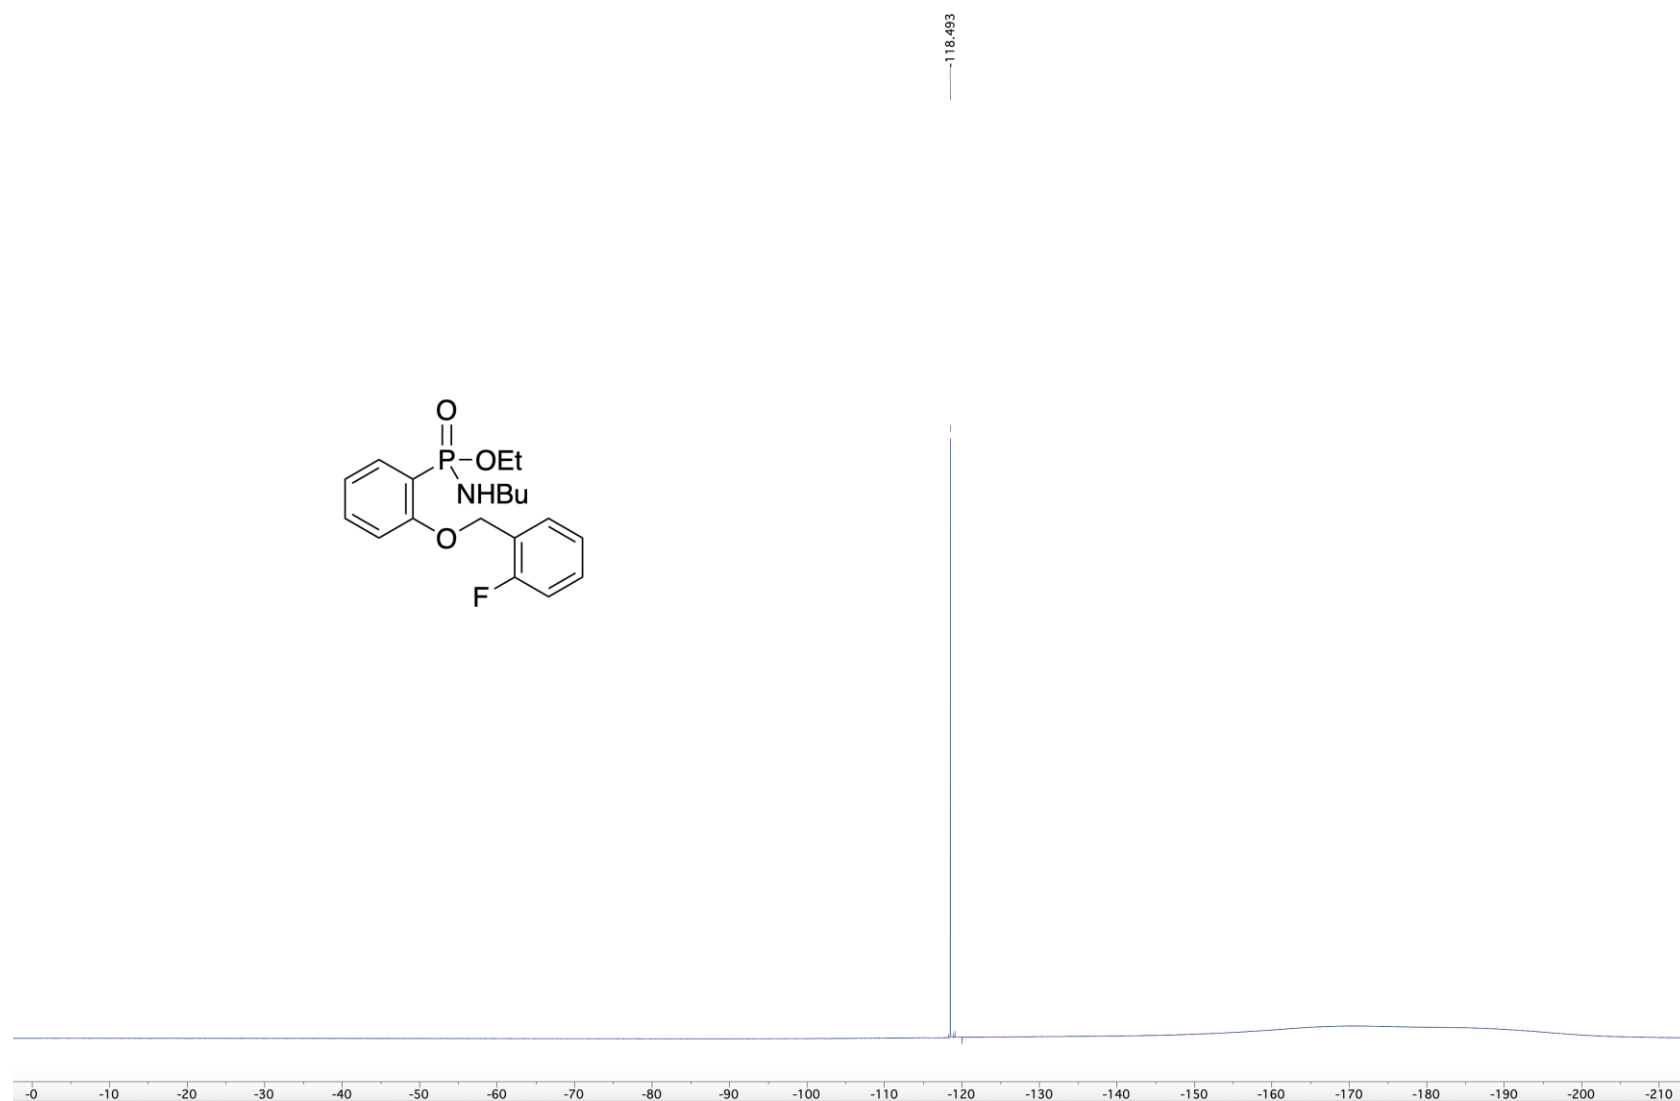

Figure S67. 162 MHz  $^{31}\text{P}$  NMR spectrum of **21g**

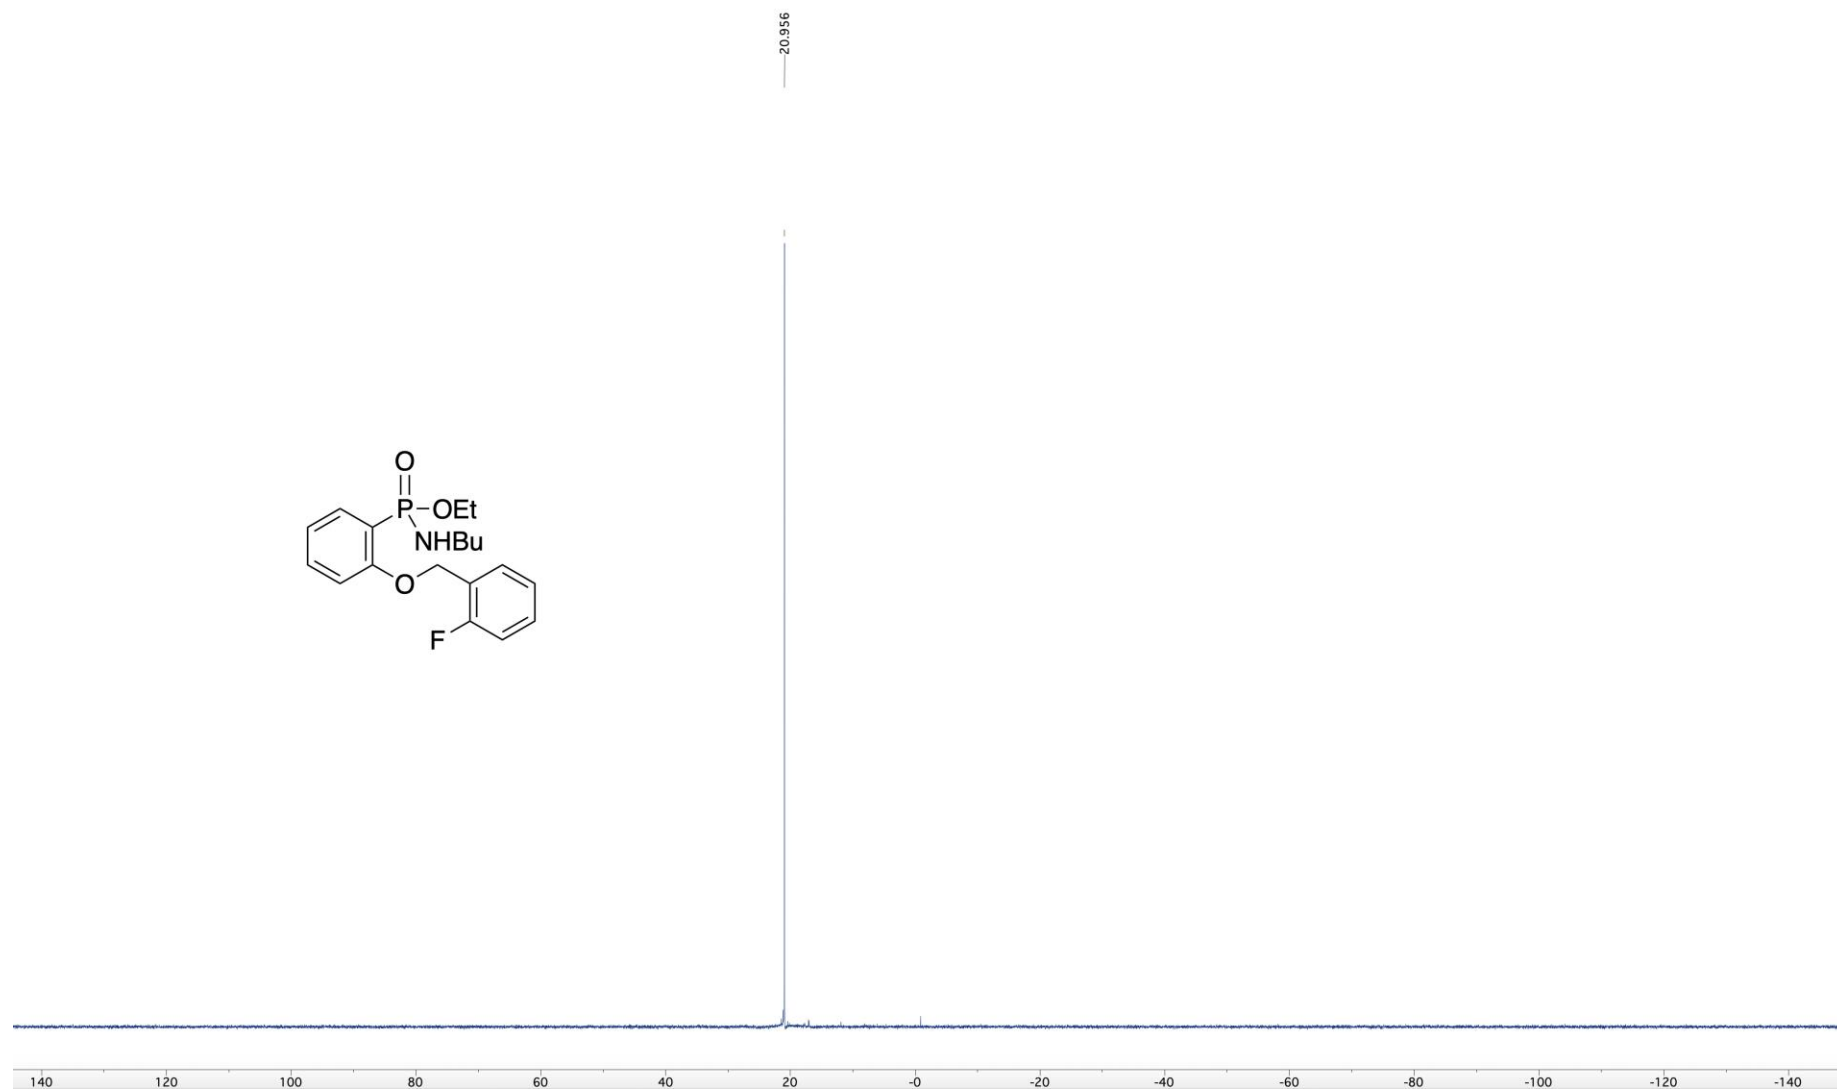

Figure S68. 100 MHz DEPTQ  $^{13}\text{C}$  NMR spectrum of **21g**

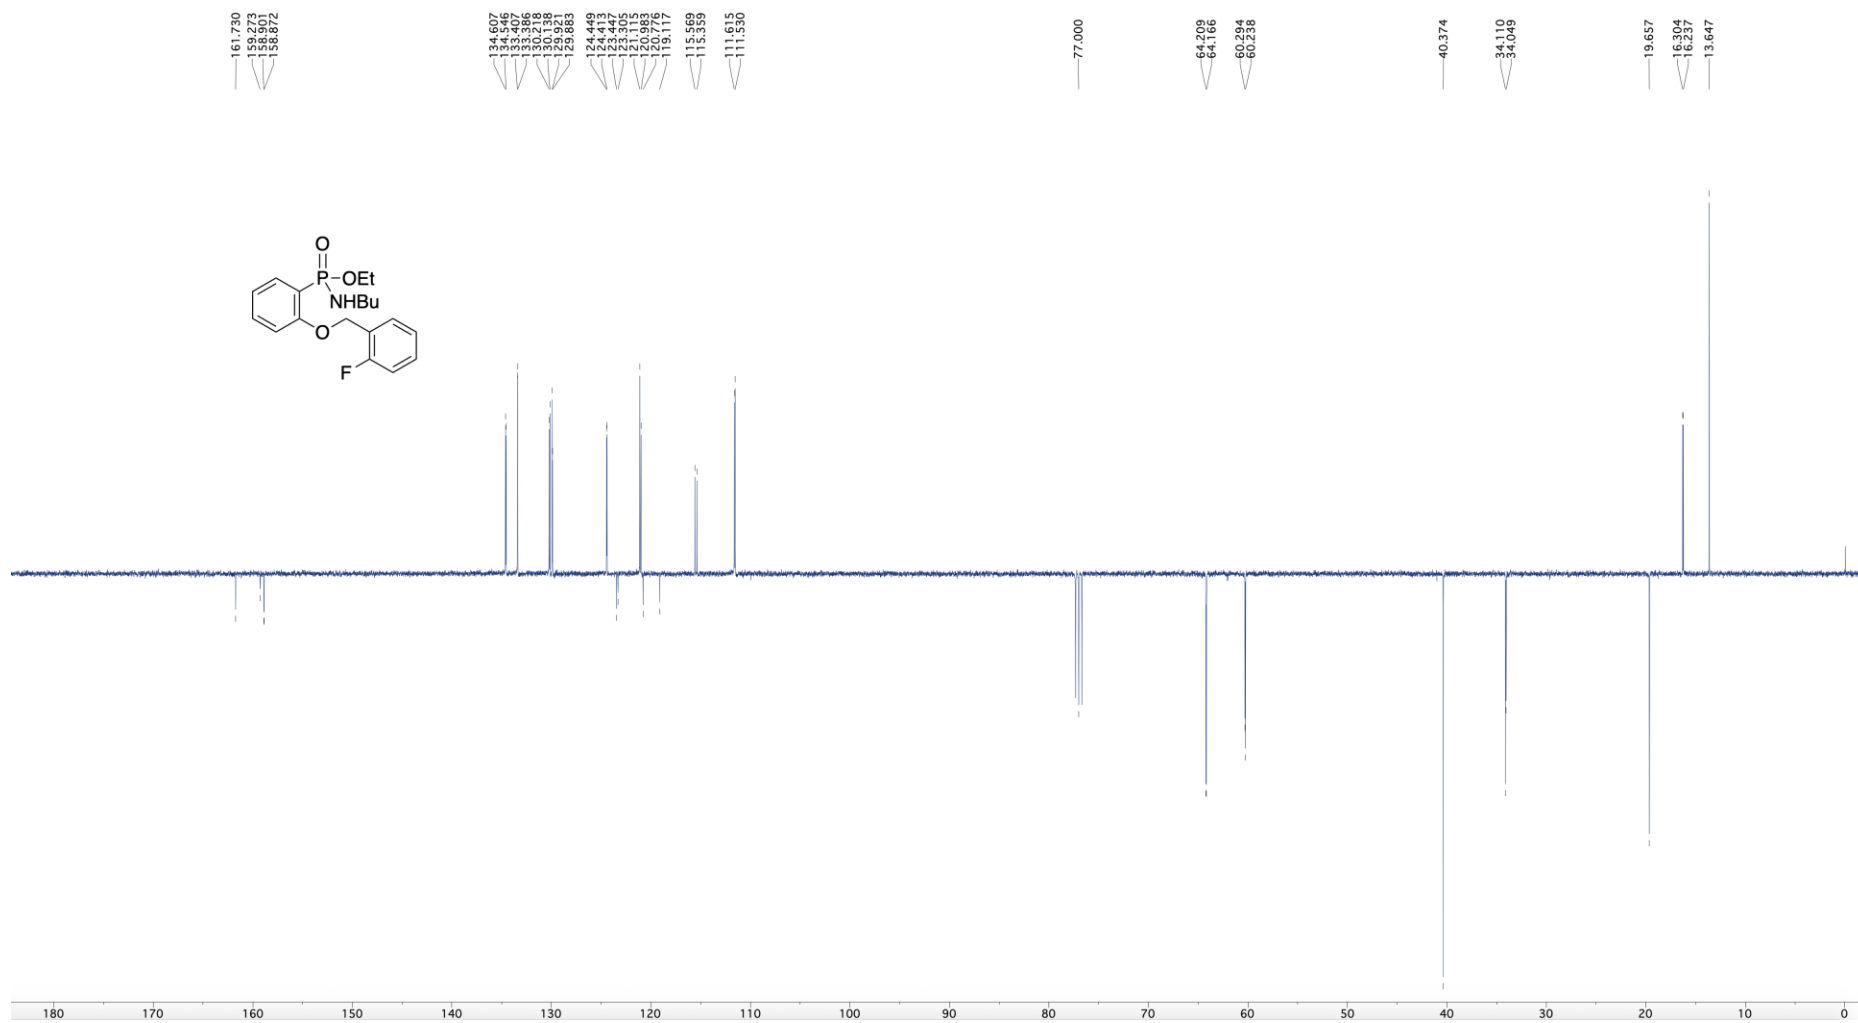

Figure S69. 400 MHz  $^1\text{H}$  NMR spectrum of **21h**

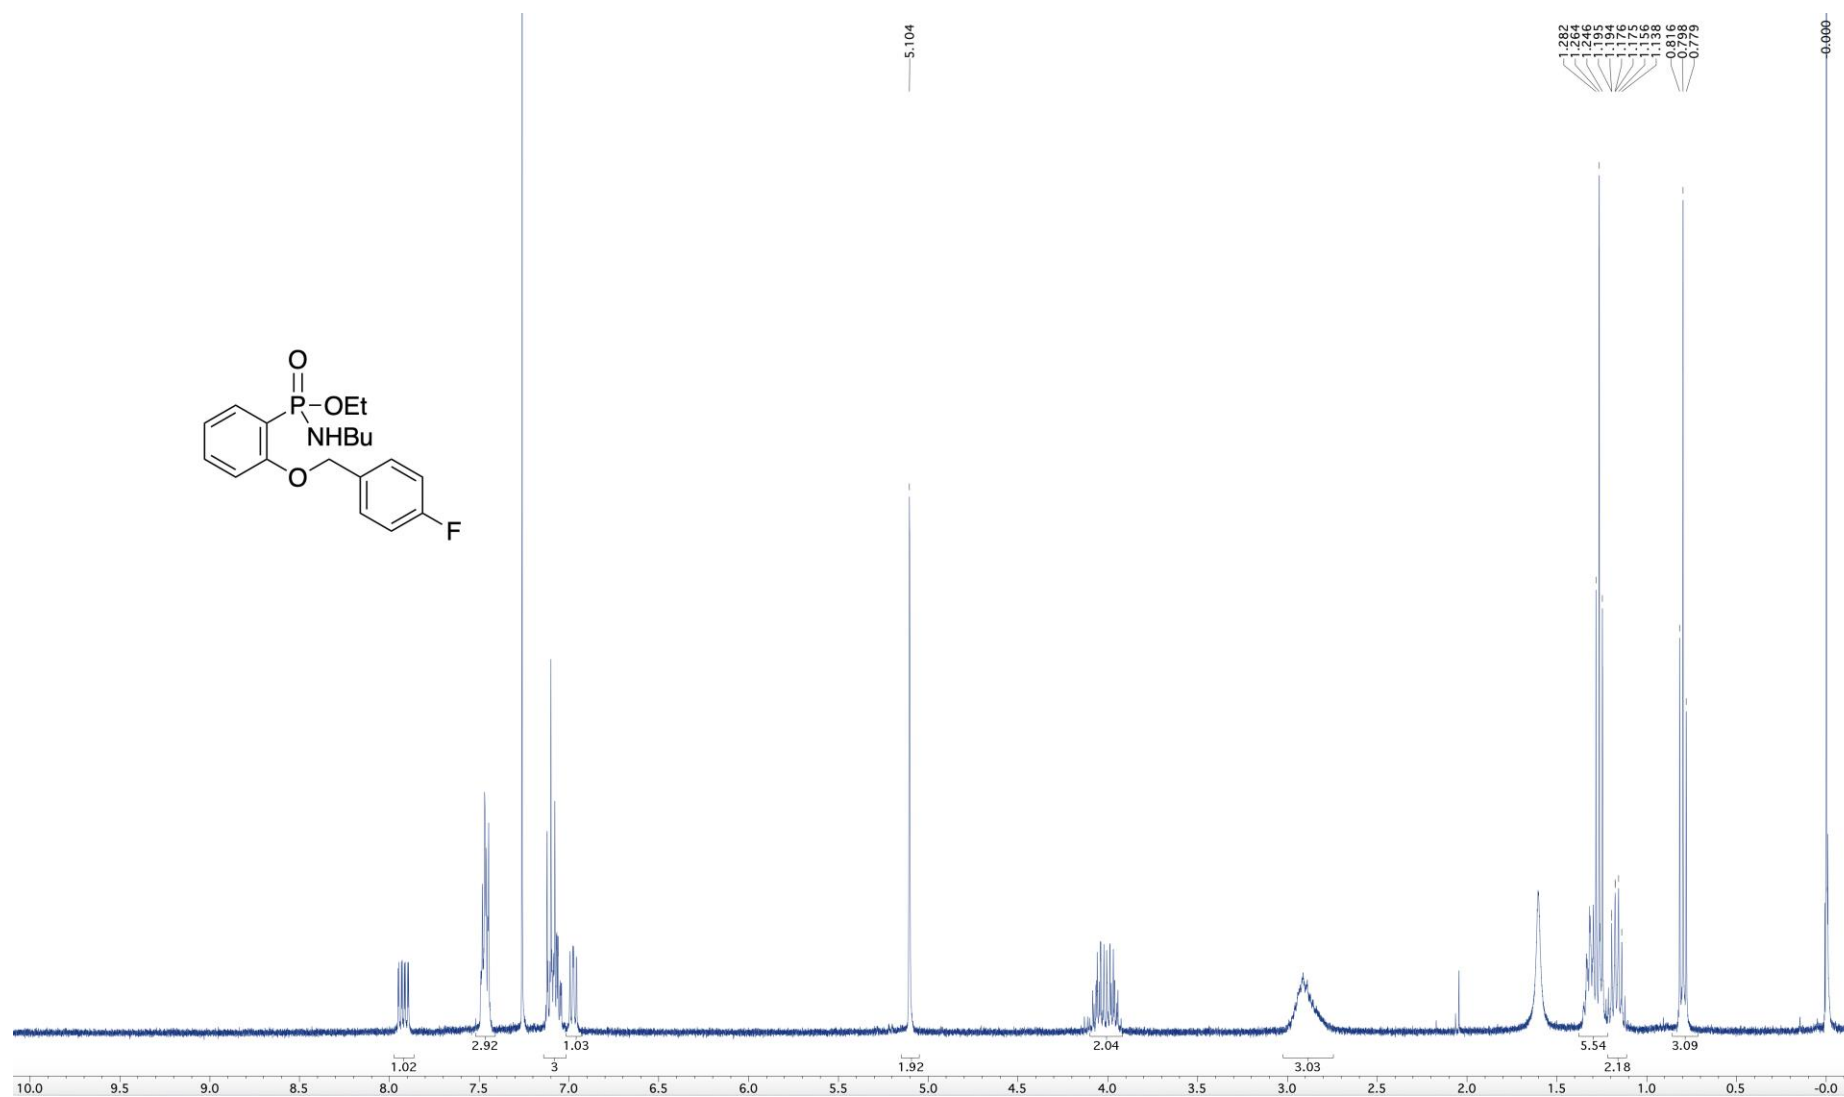

Figure S70. 376 MHz  $^{19}\text{F}$  NMR spectrum of **21h**

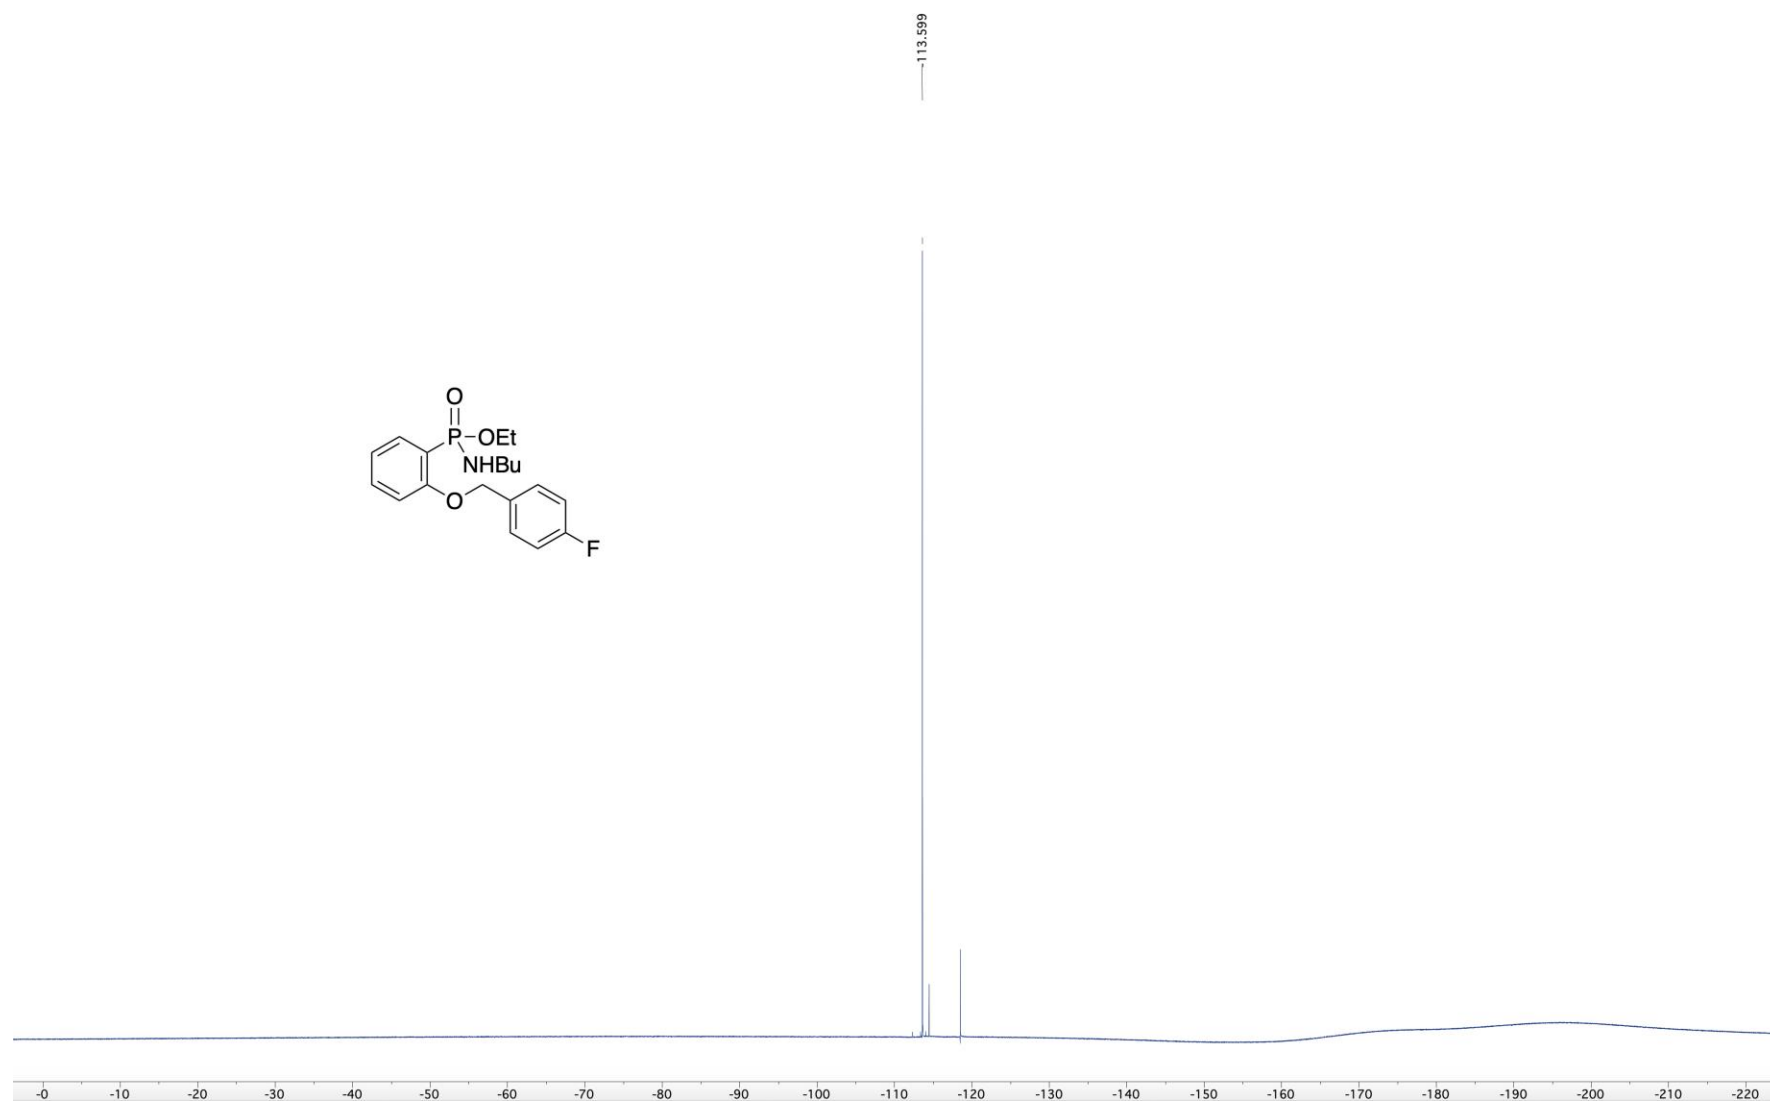

Figure S71. 162 MHz  $^{31}\text{P}$  NMR spectrum of **21h**

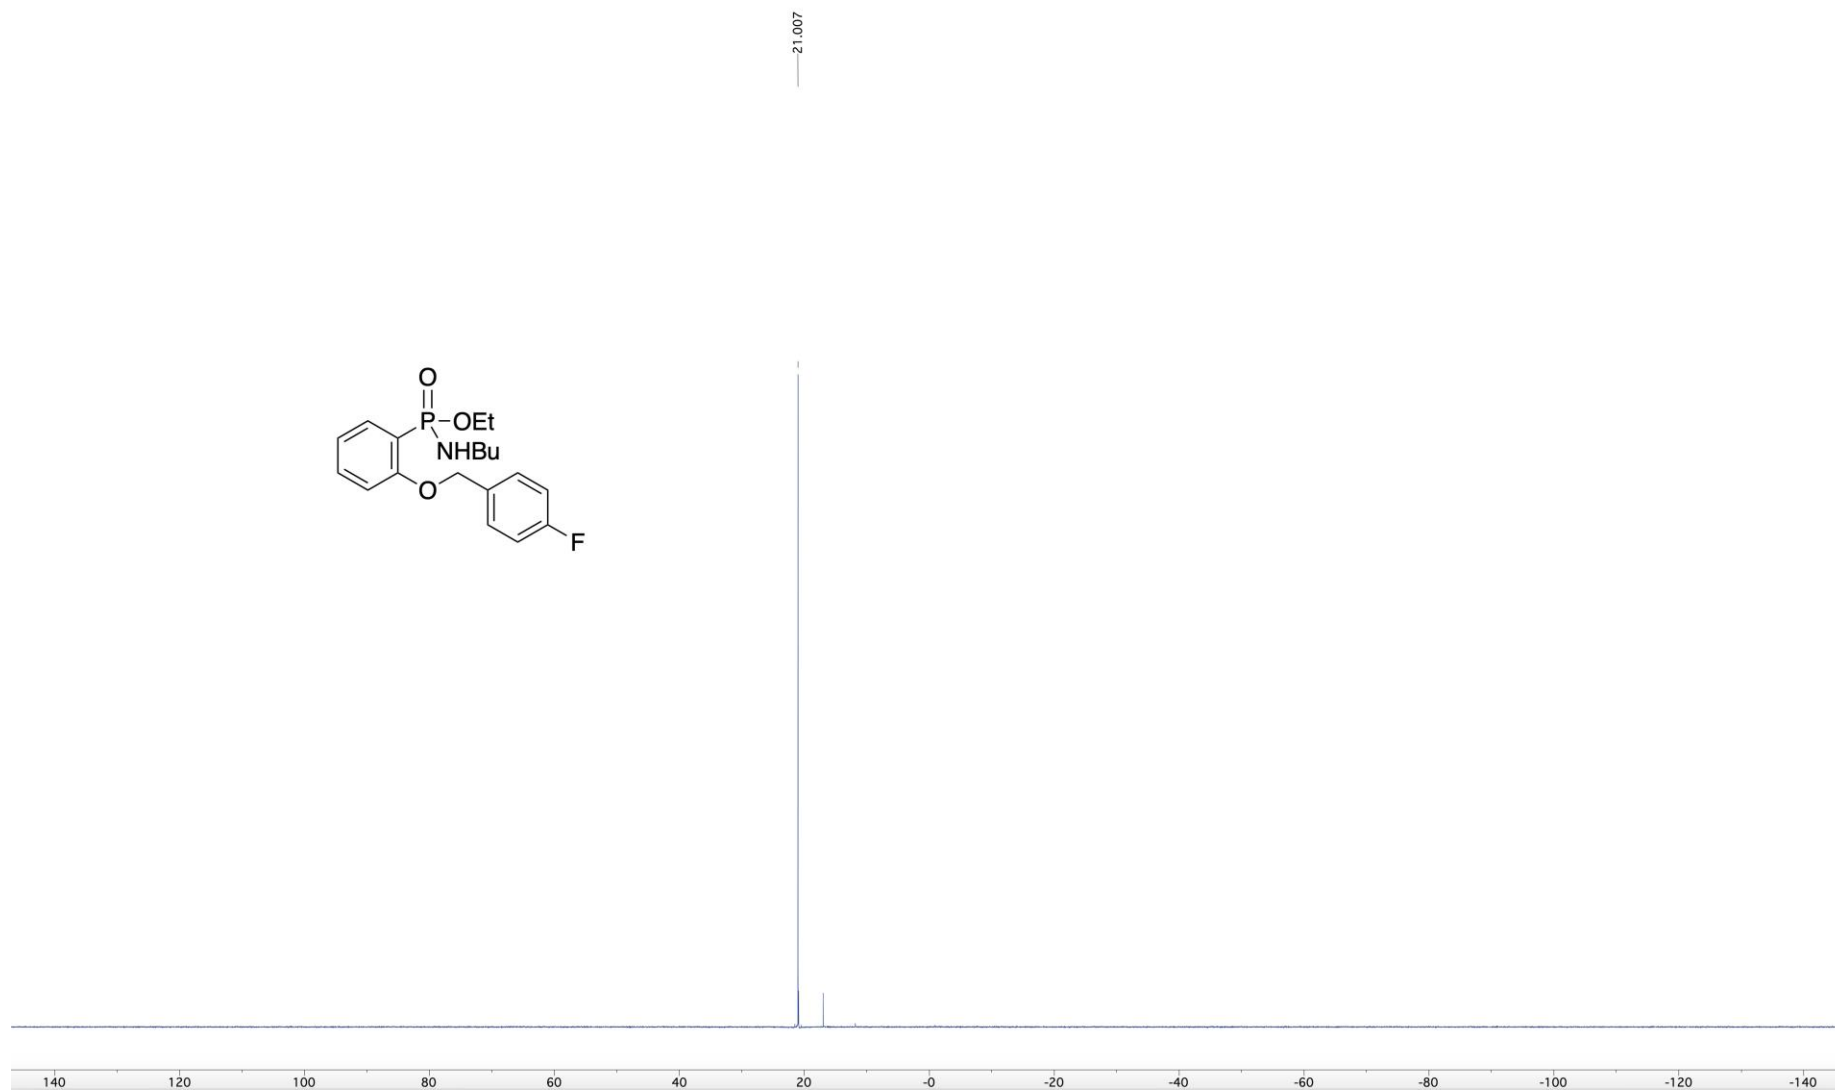

Figure S72. 100 MHz DEPTQ  $^{13}\text{C}$  NMR spectrum of **21h**

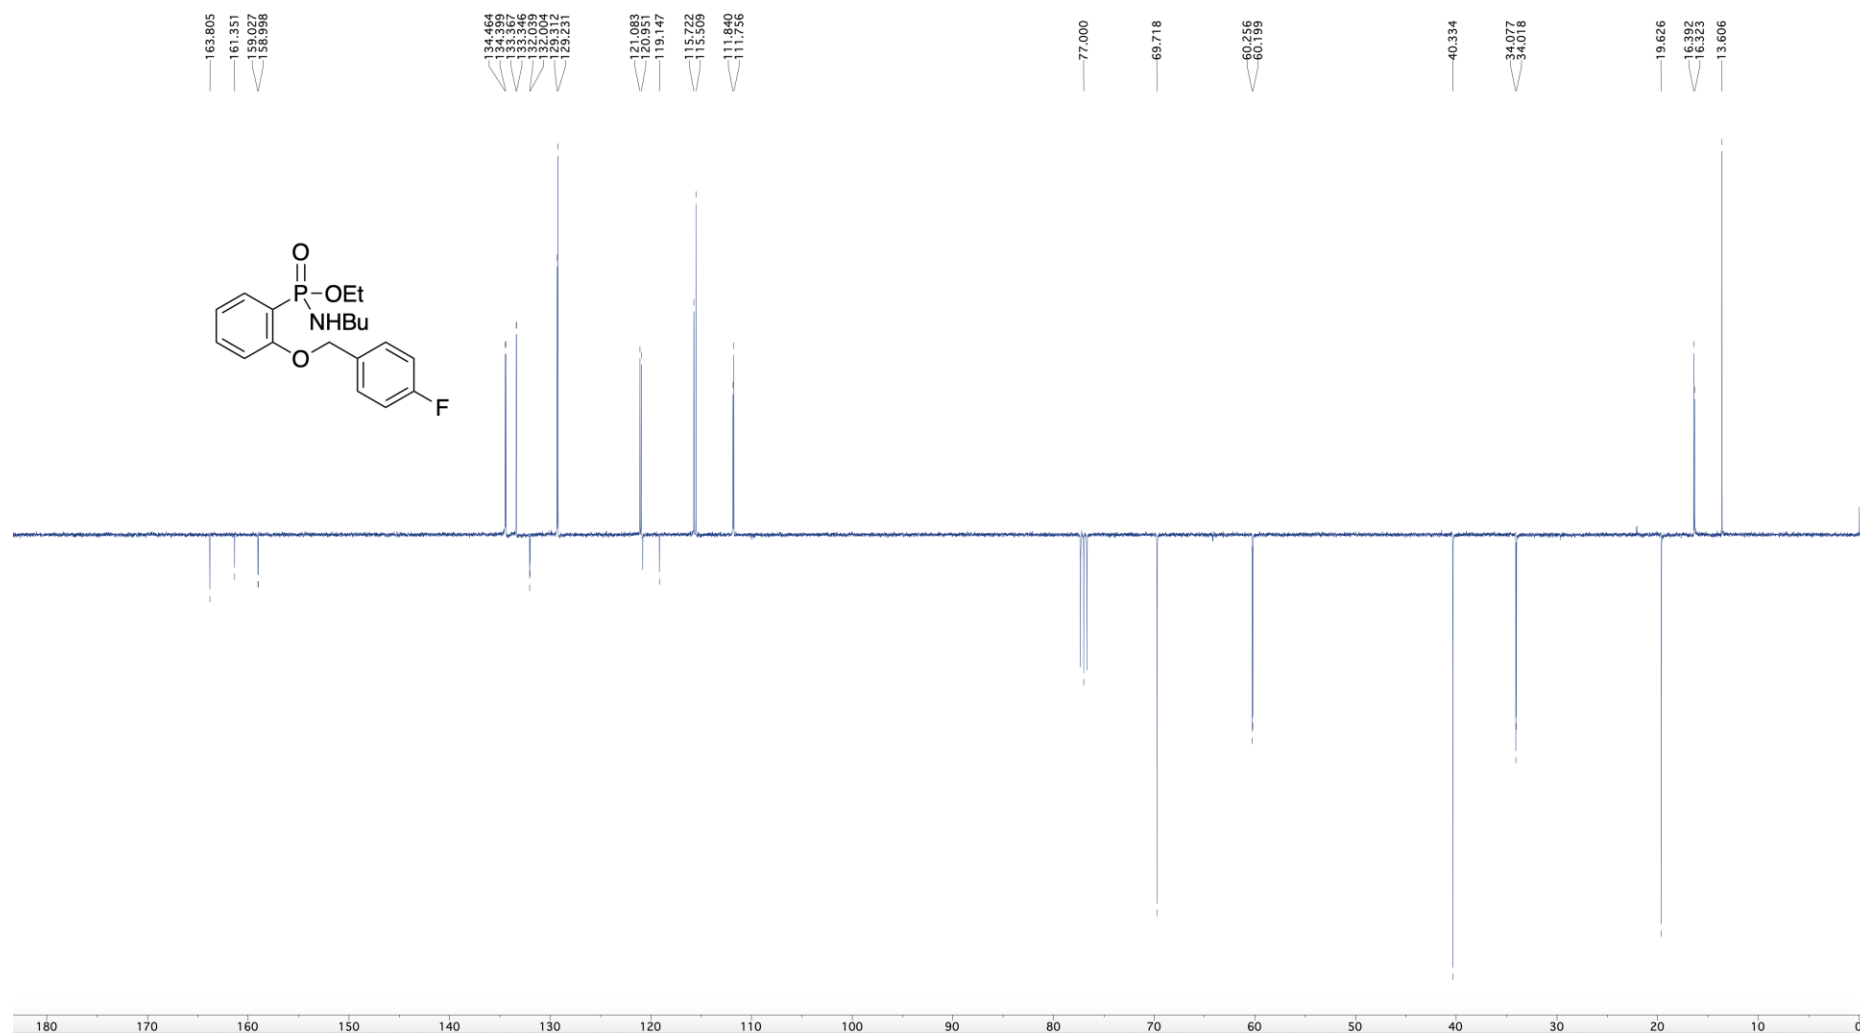

Figure S73. 400 MHz  $^1\text{H}$  NMR spectrum of **21i**

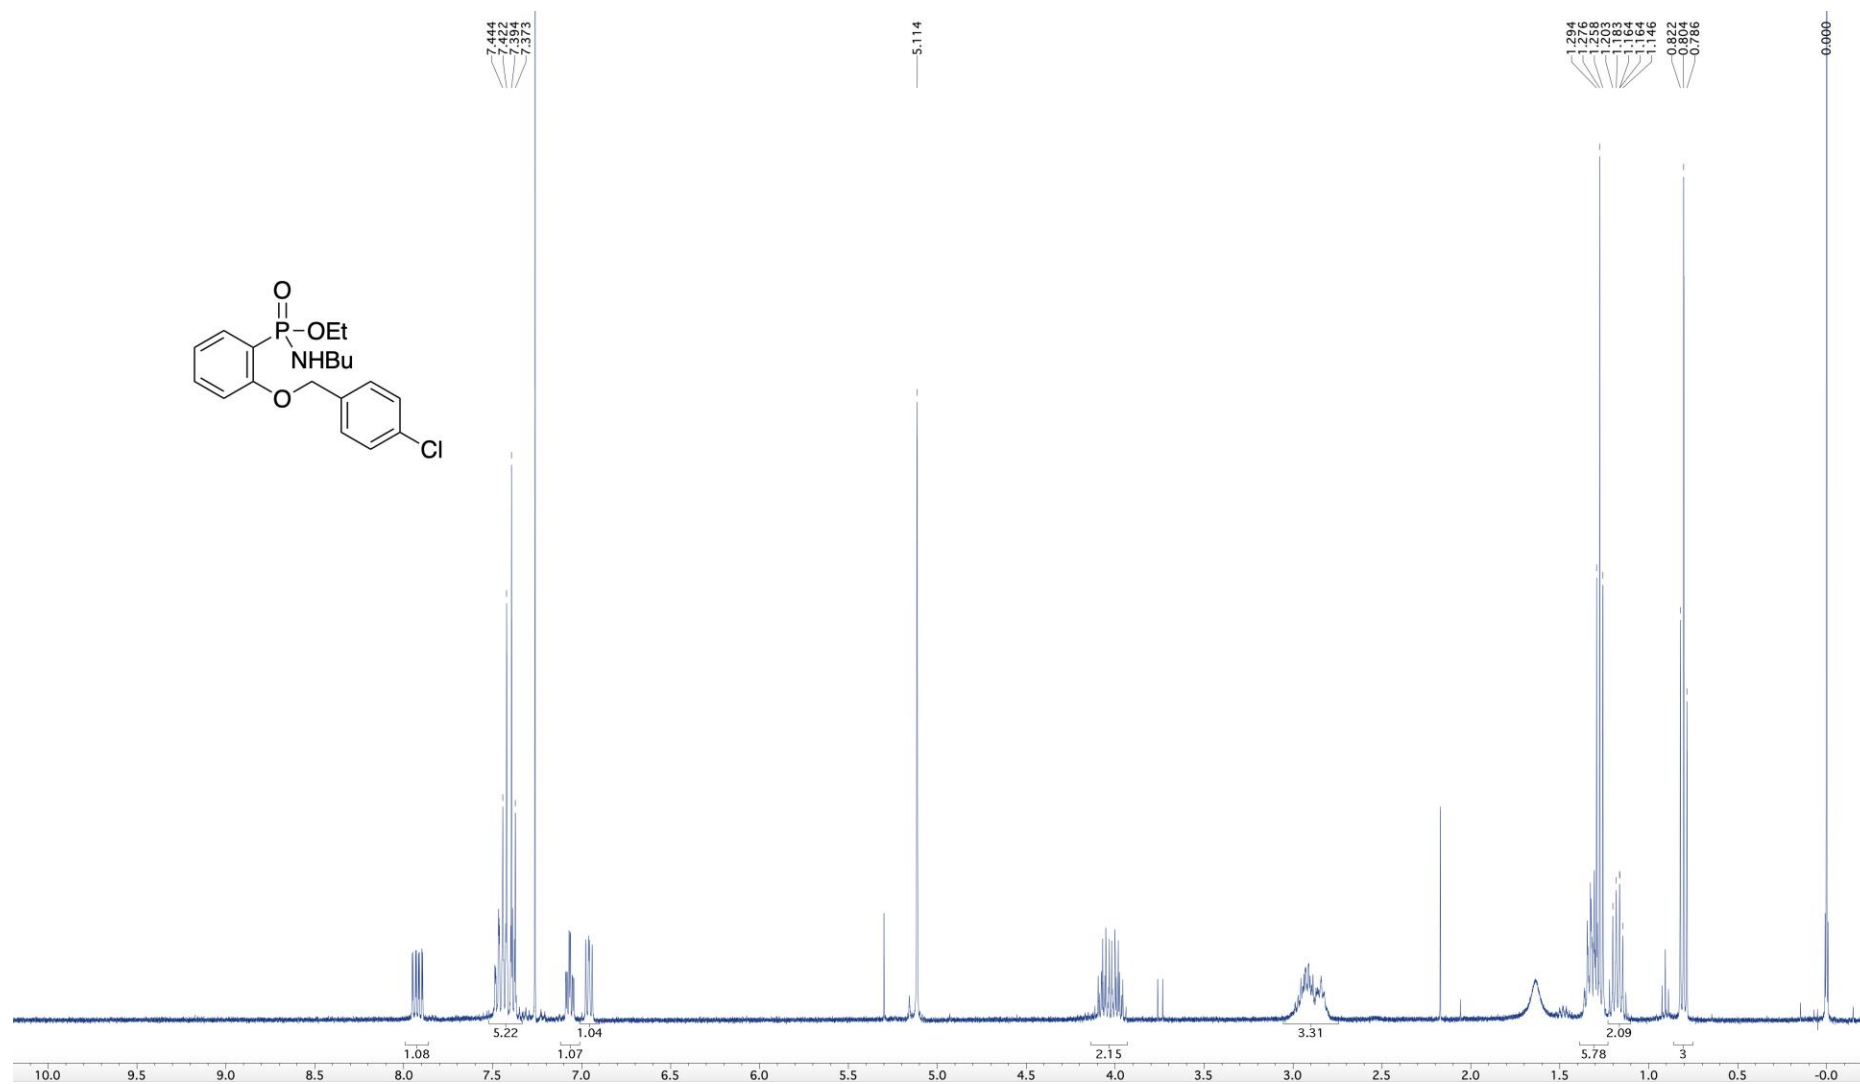



Figure S74. 162 MHz  $^{31}\text{P}$  NMR spectrum of **21i**

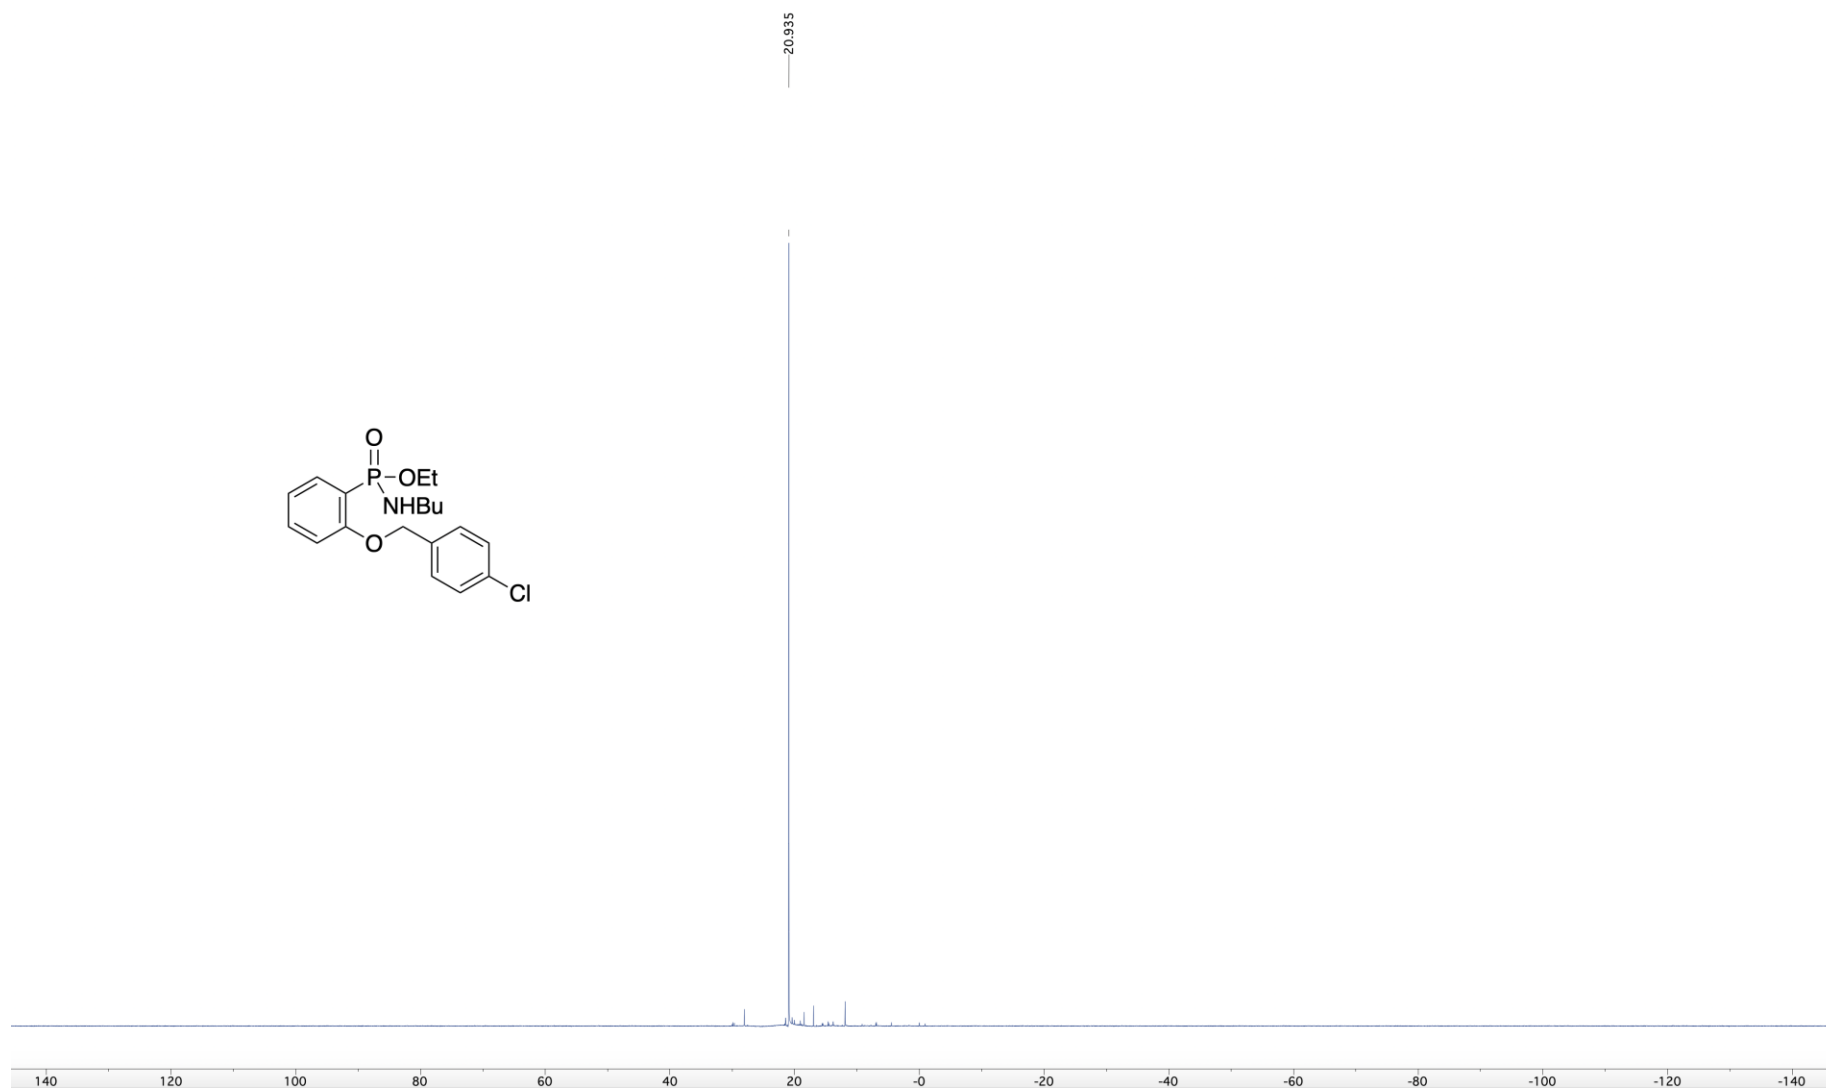

Figure S75. 100 MHz DEPTQ  $^{13}\text{C}$  NMR spectrum of **21i**

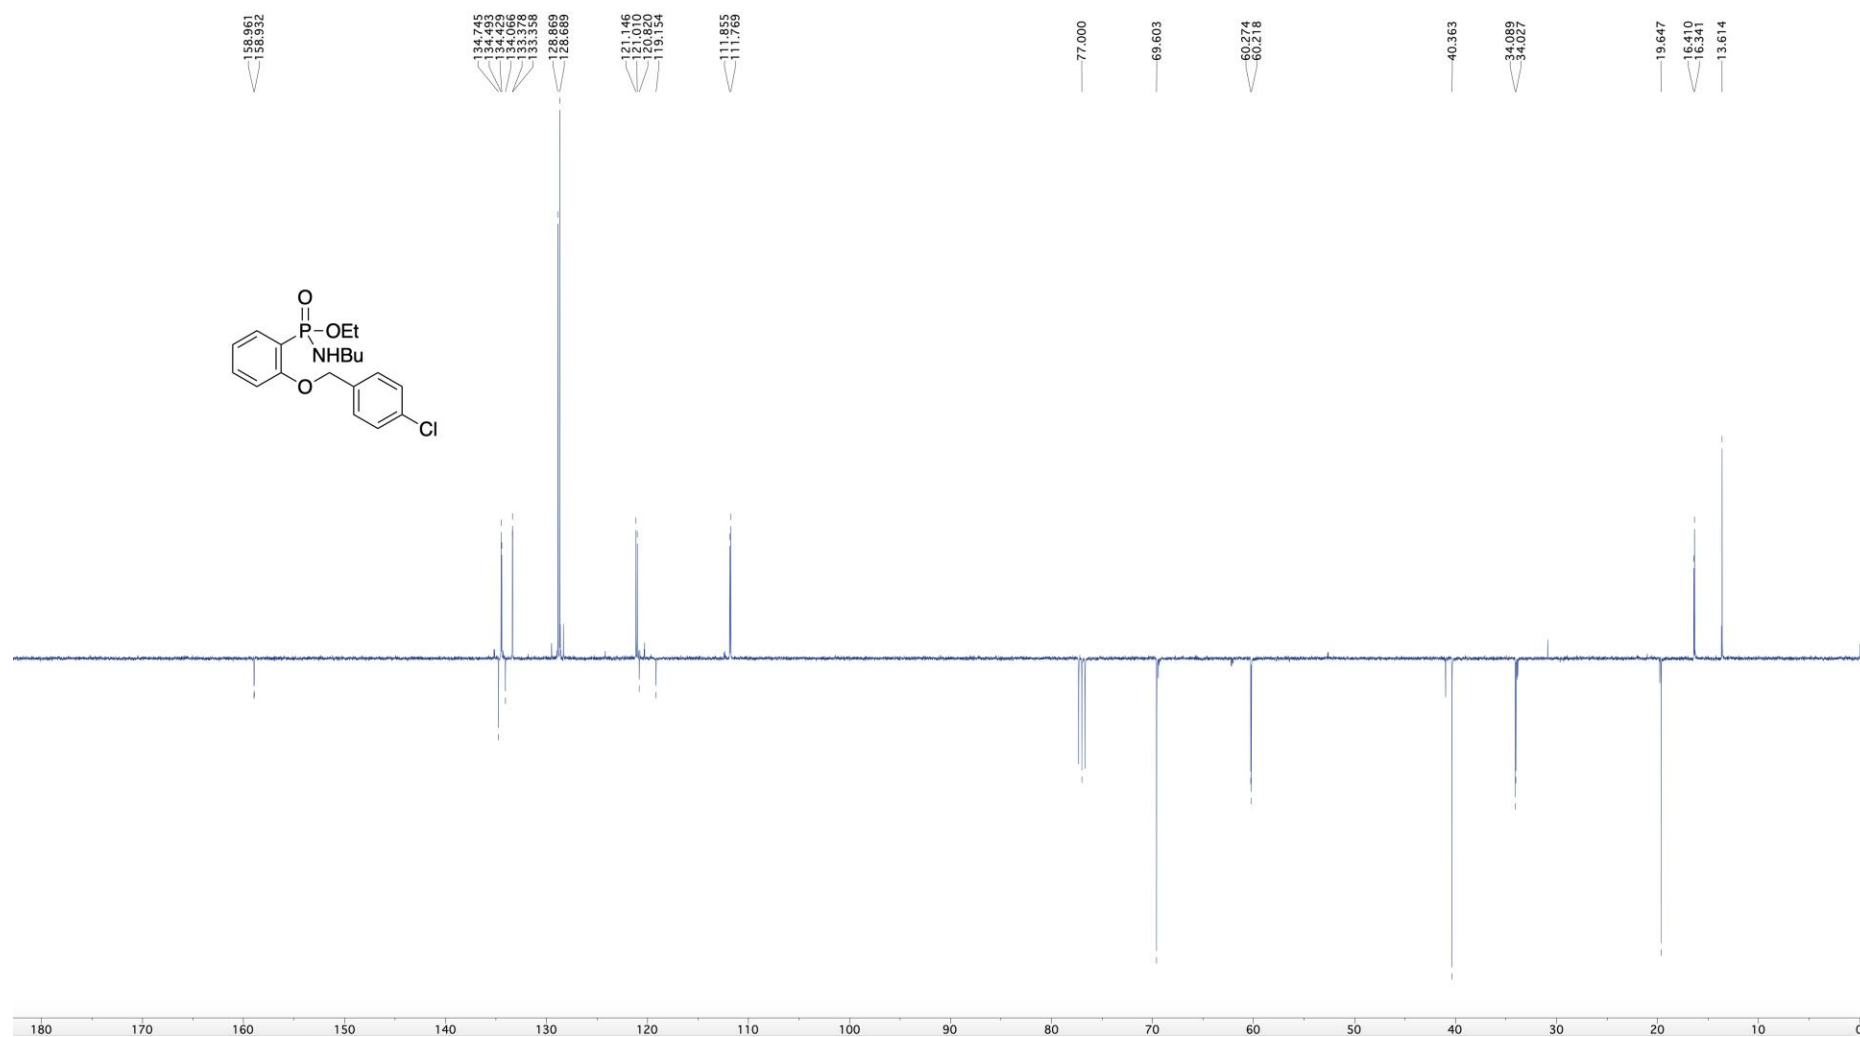

Figure S76. 400 MHz  $^1\text{H}$  NMR spectrum of **21j**

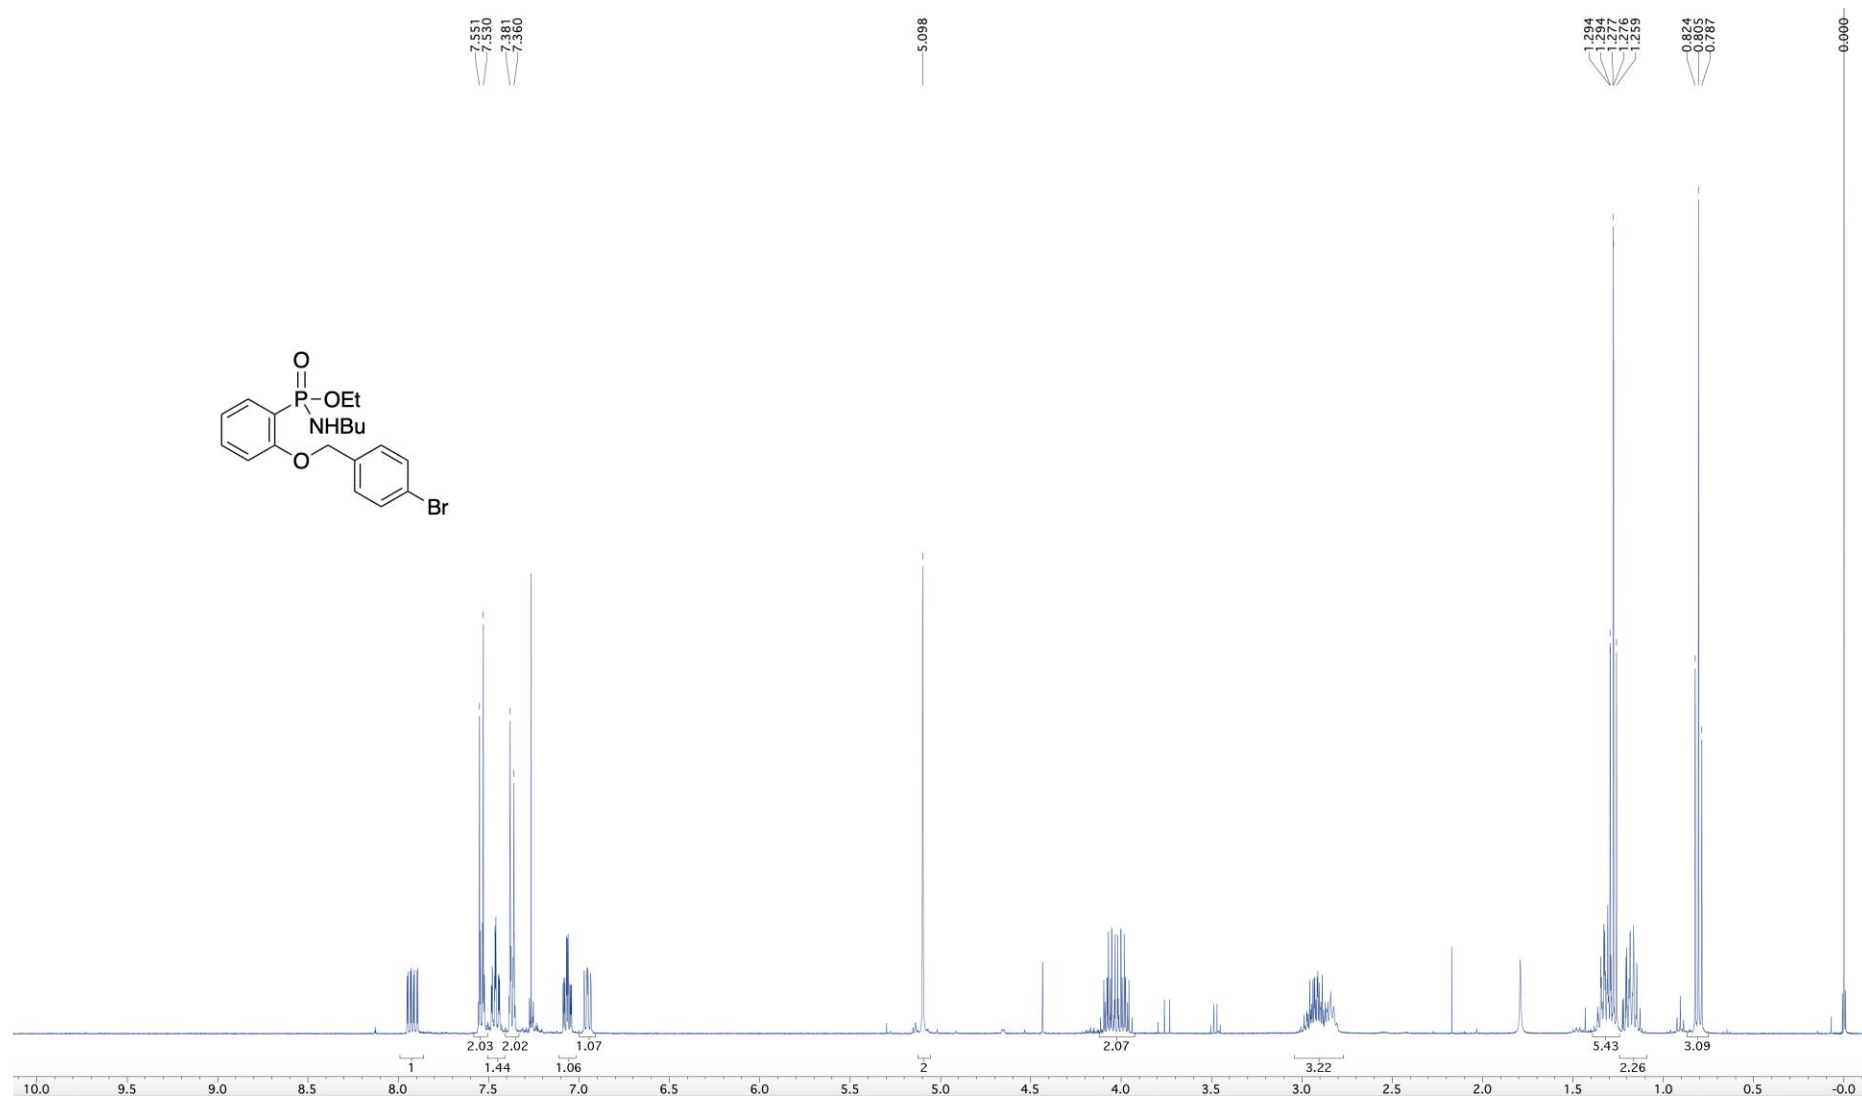

Figure S77. 162 MHz  $^{31}\text{P}$  NMR spectrum of **21j**

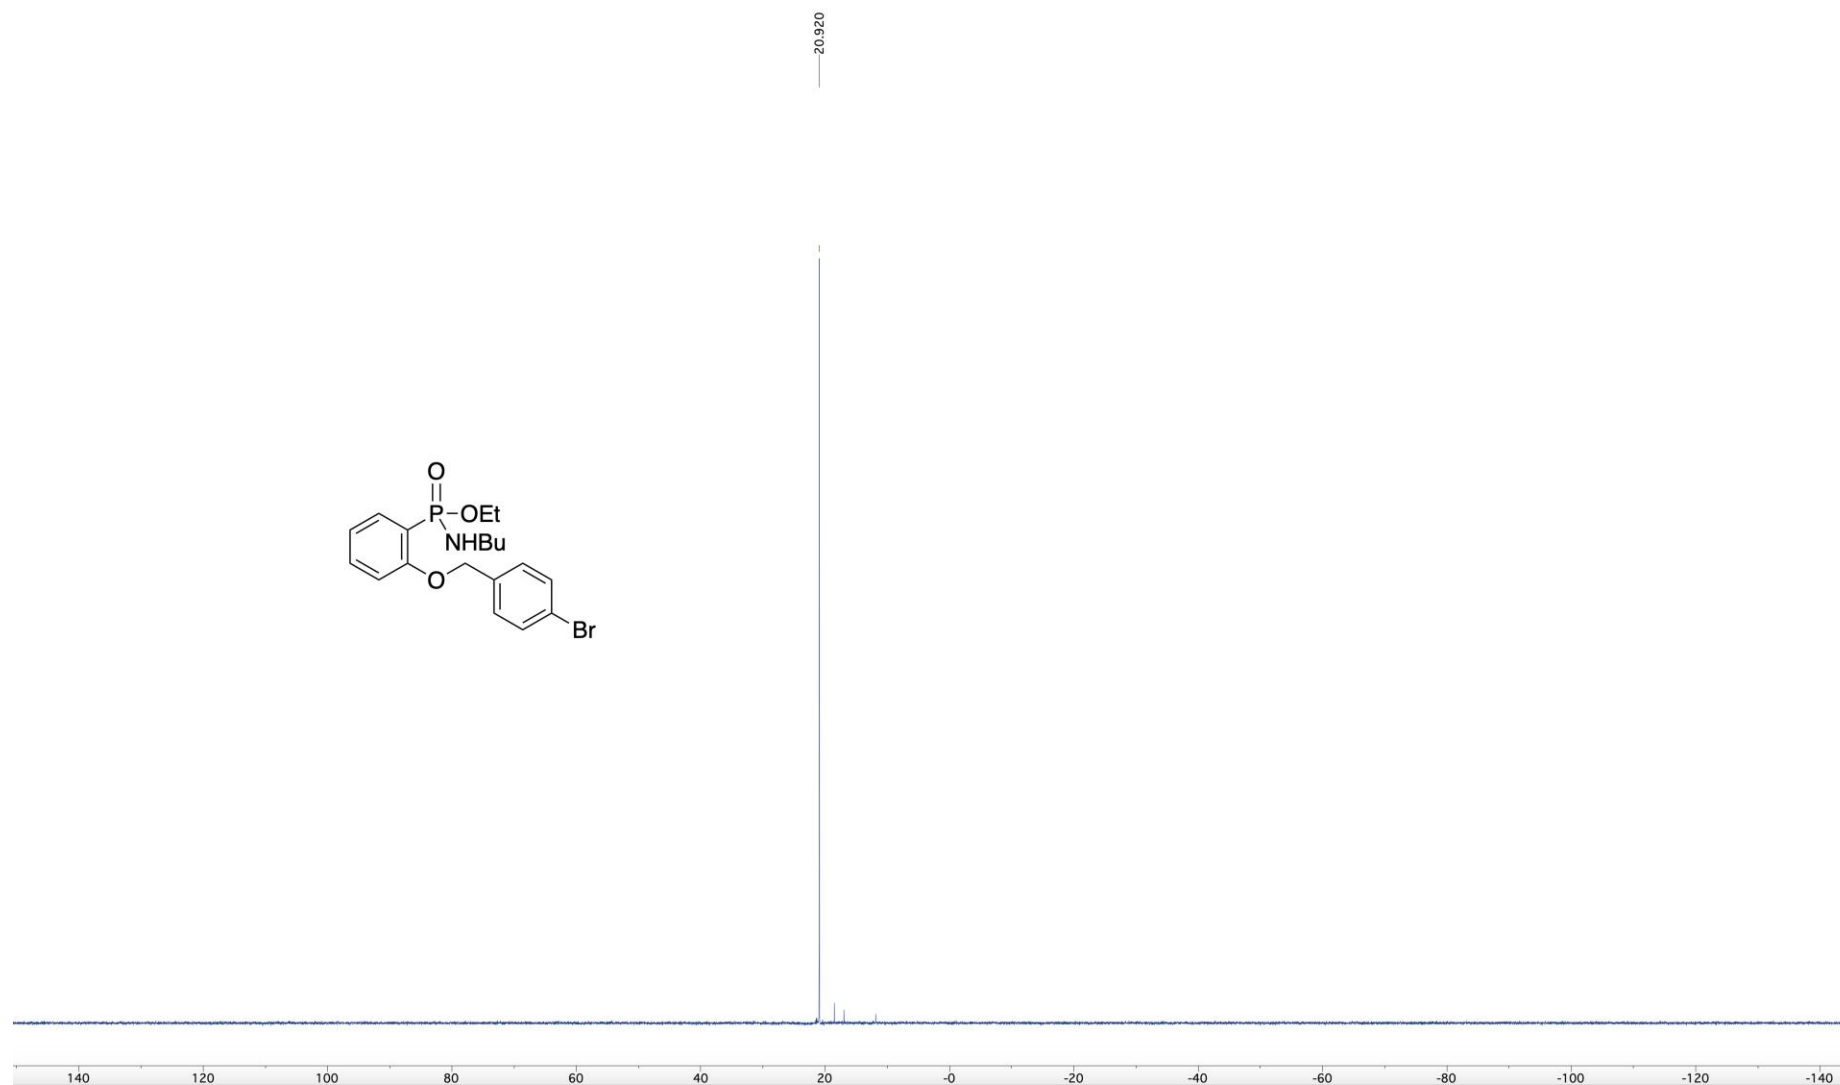

Figure S78. 100 MHz DEPTQ  $^{13}\text{C}$  NMR spectrum of **21j**

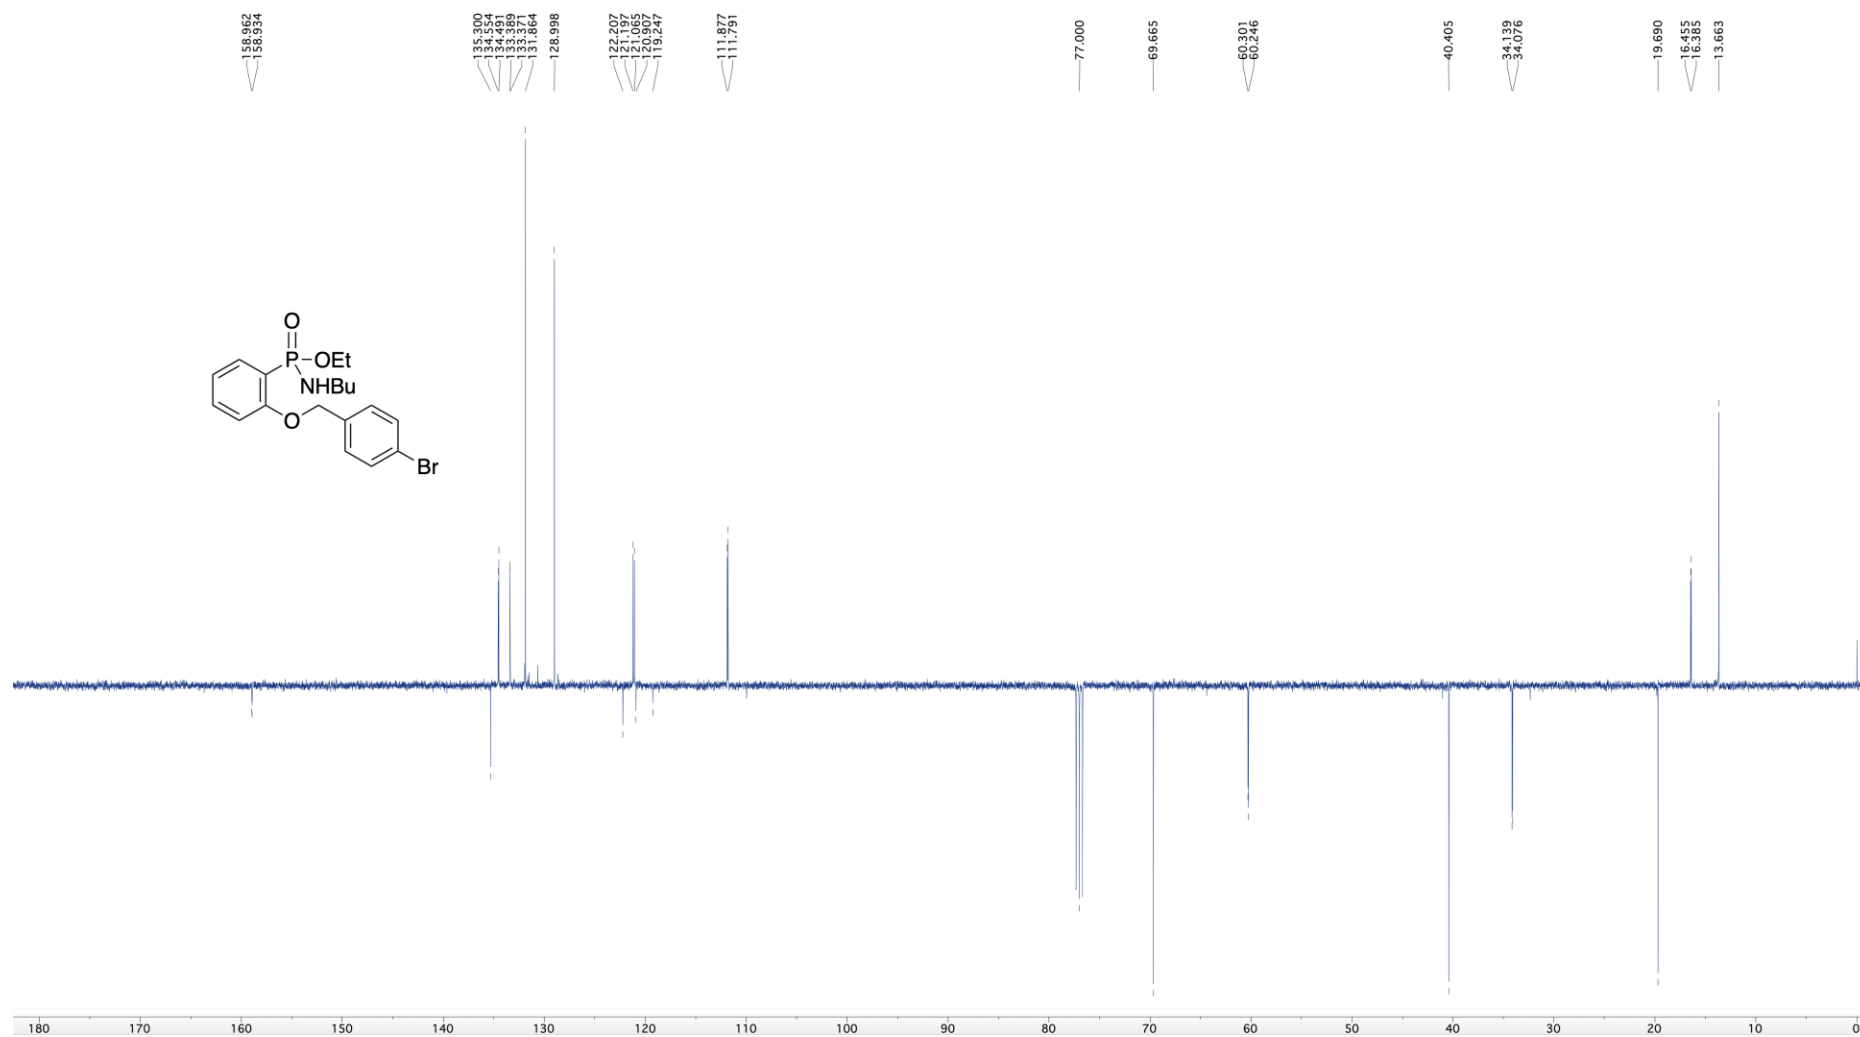

Figure S79. 400 MHz  $^1\text{H}$  NMR spectrum of **21k**

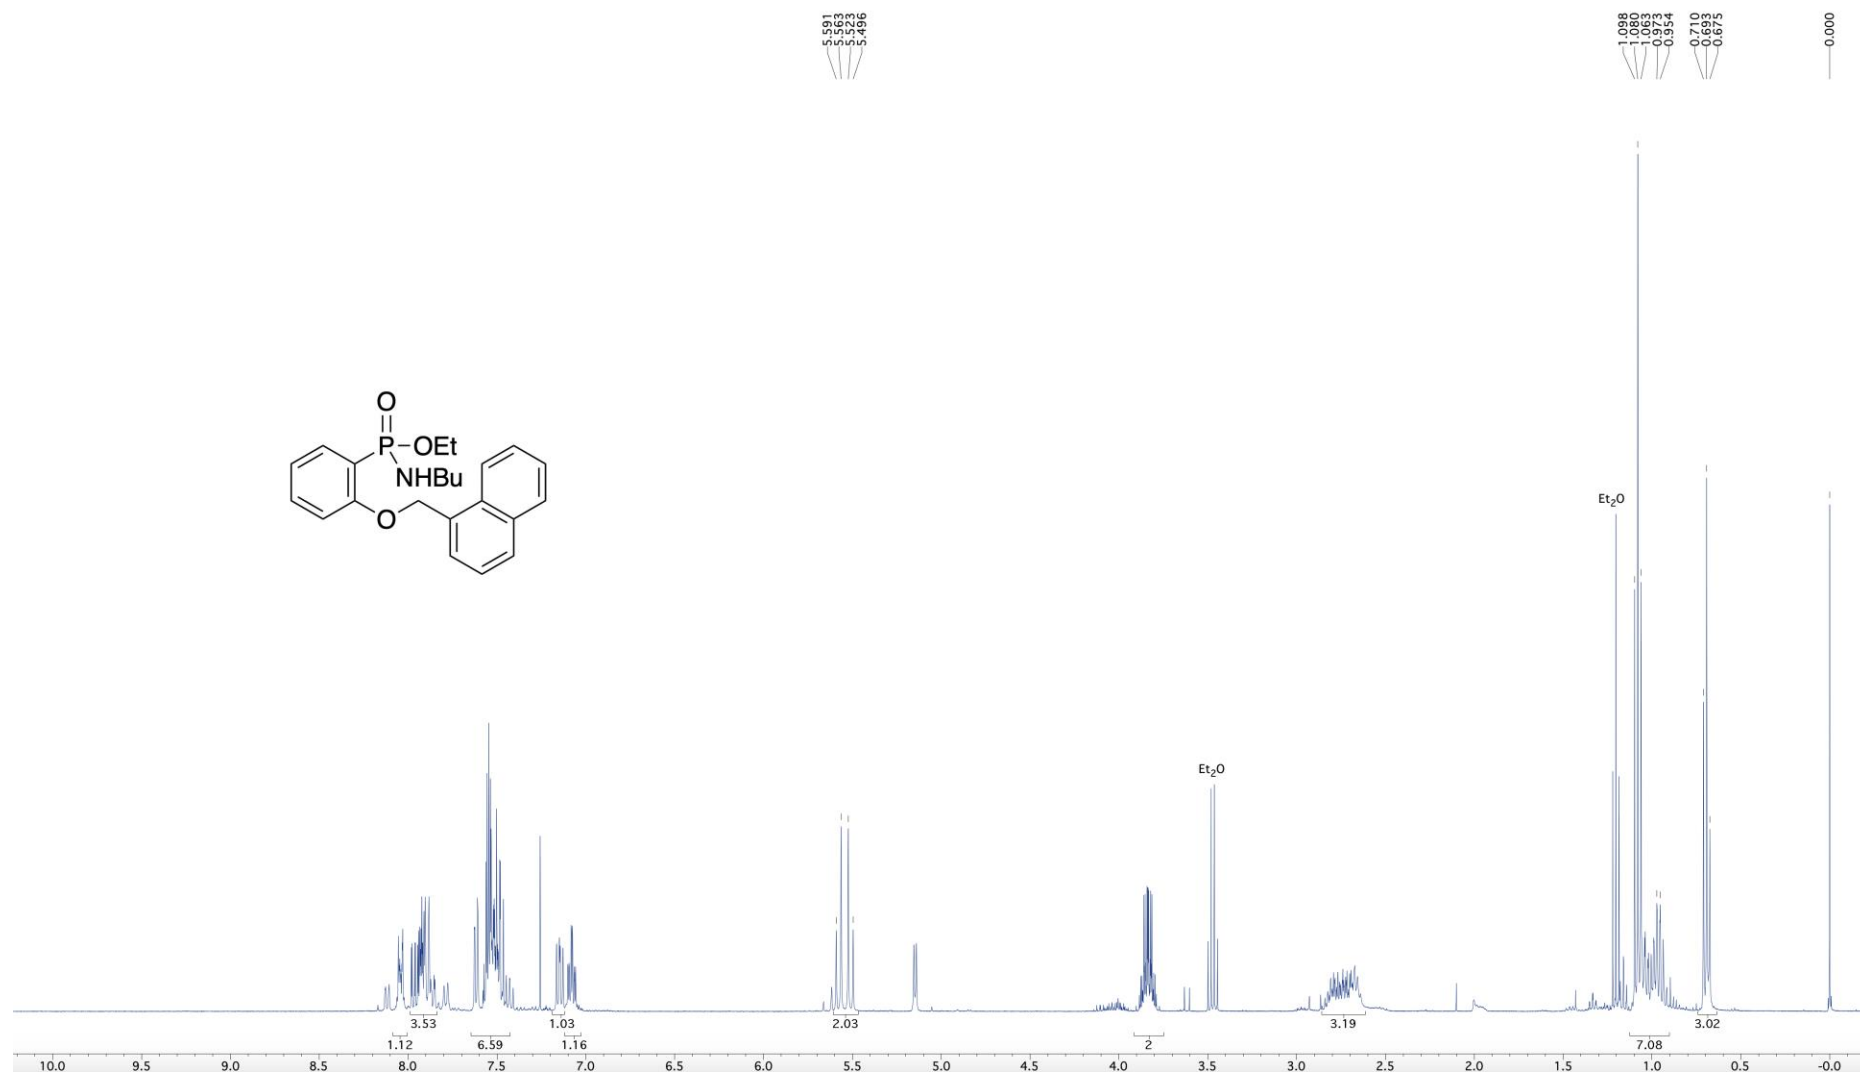

Figure S80. 162 MHz  $^{31}\text{P}$  NMR spectrum of **21k**

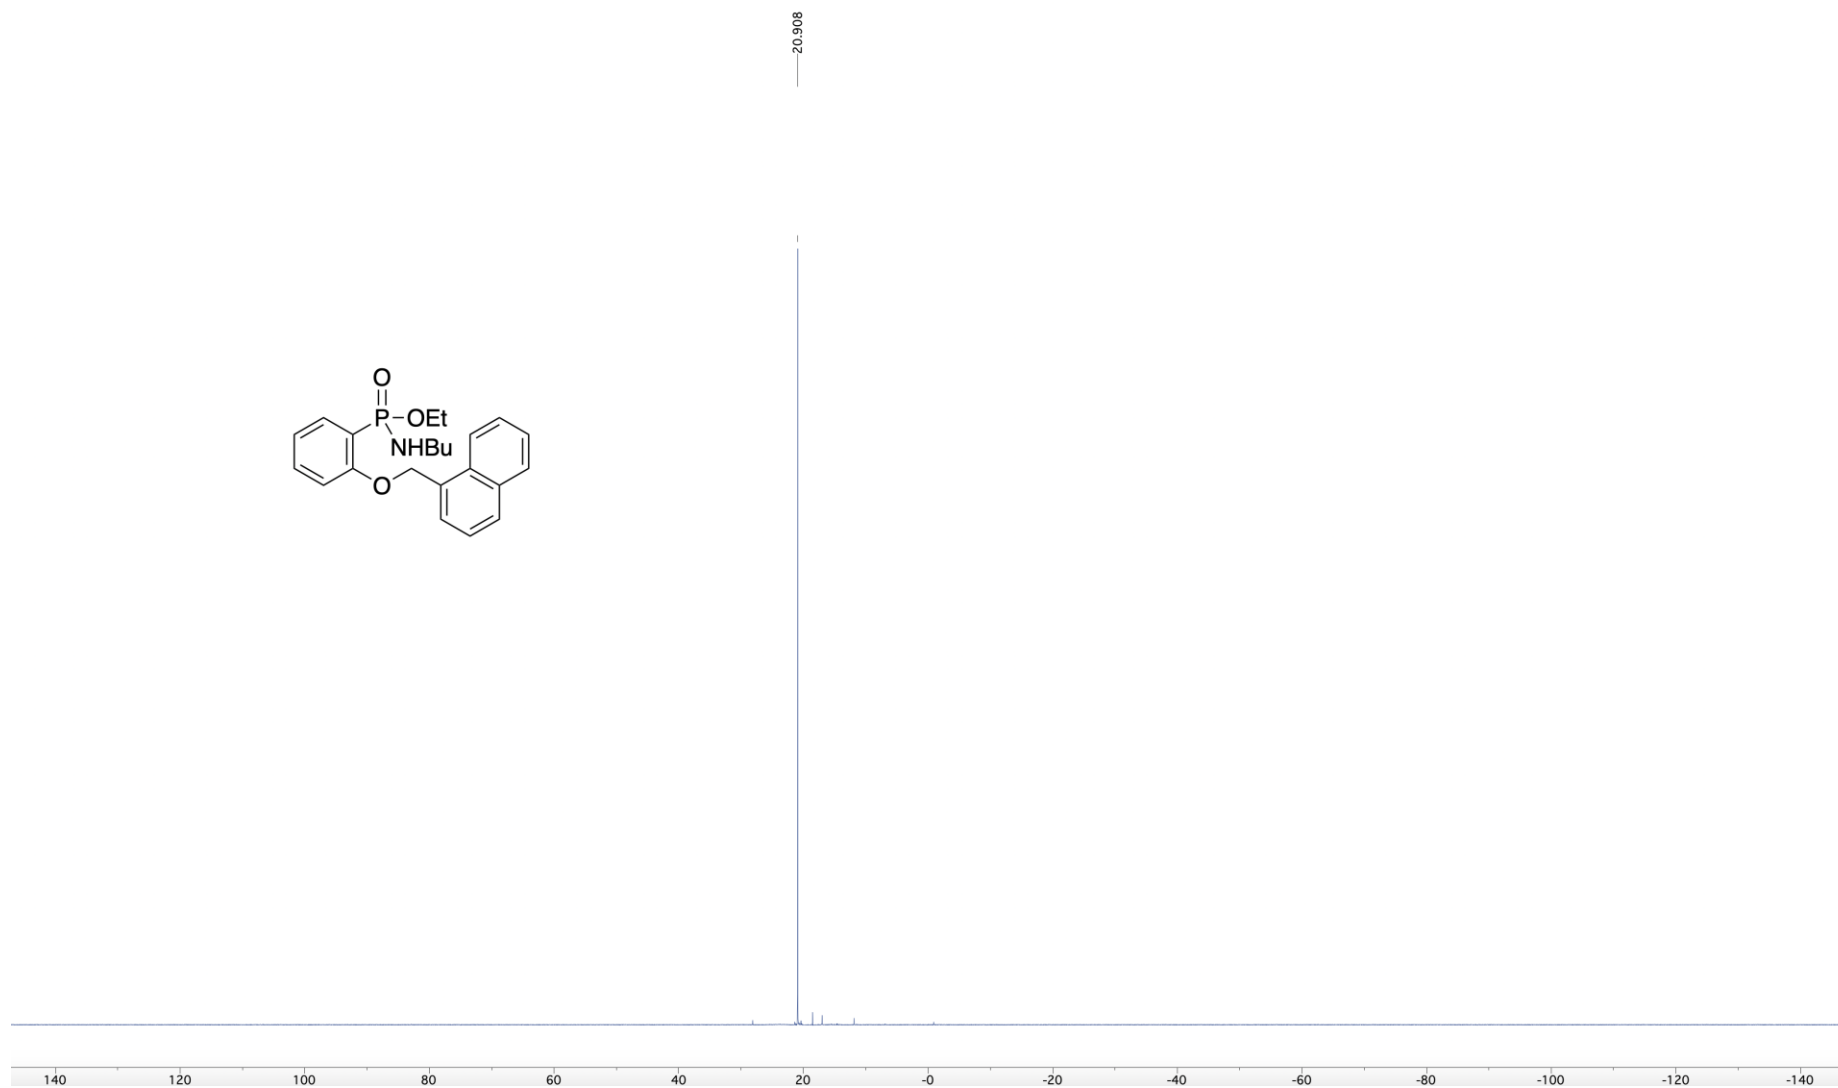

CCOP(=O)(c1ccccc1)COC2=CC=CC=C2

159.128  
159.099  
141.94  
141.29  
139.29  
139.25  
139.15  
139.12  
139.06  
138.96  
138.50  
136.94  
136.54  
135.98  
131.004  
120.872  
119.152  
111.455  
111.372  
77.000  
68.781  
60.161  
60.103  
40.197  
33.970  
33.911  
19.506  
16.212  
16.148  
13.605

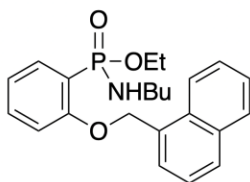



Figure S82. 400 MHz  $^1\text{H}$  NMR spectrum of **211**

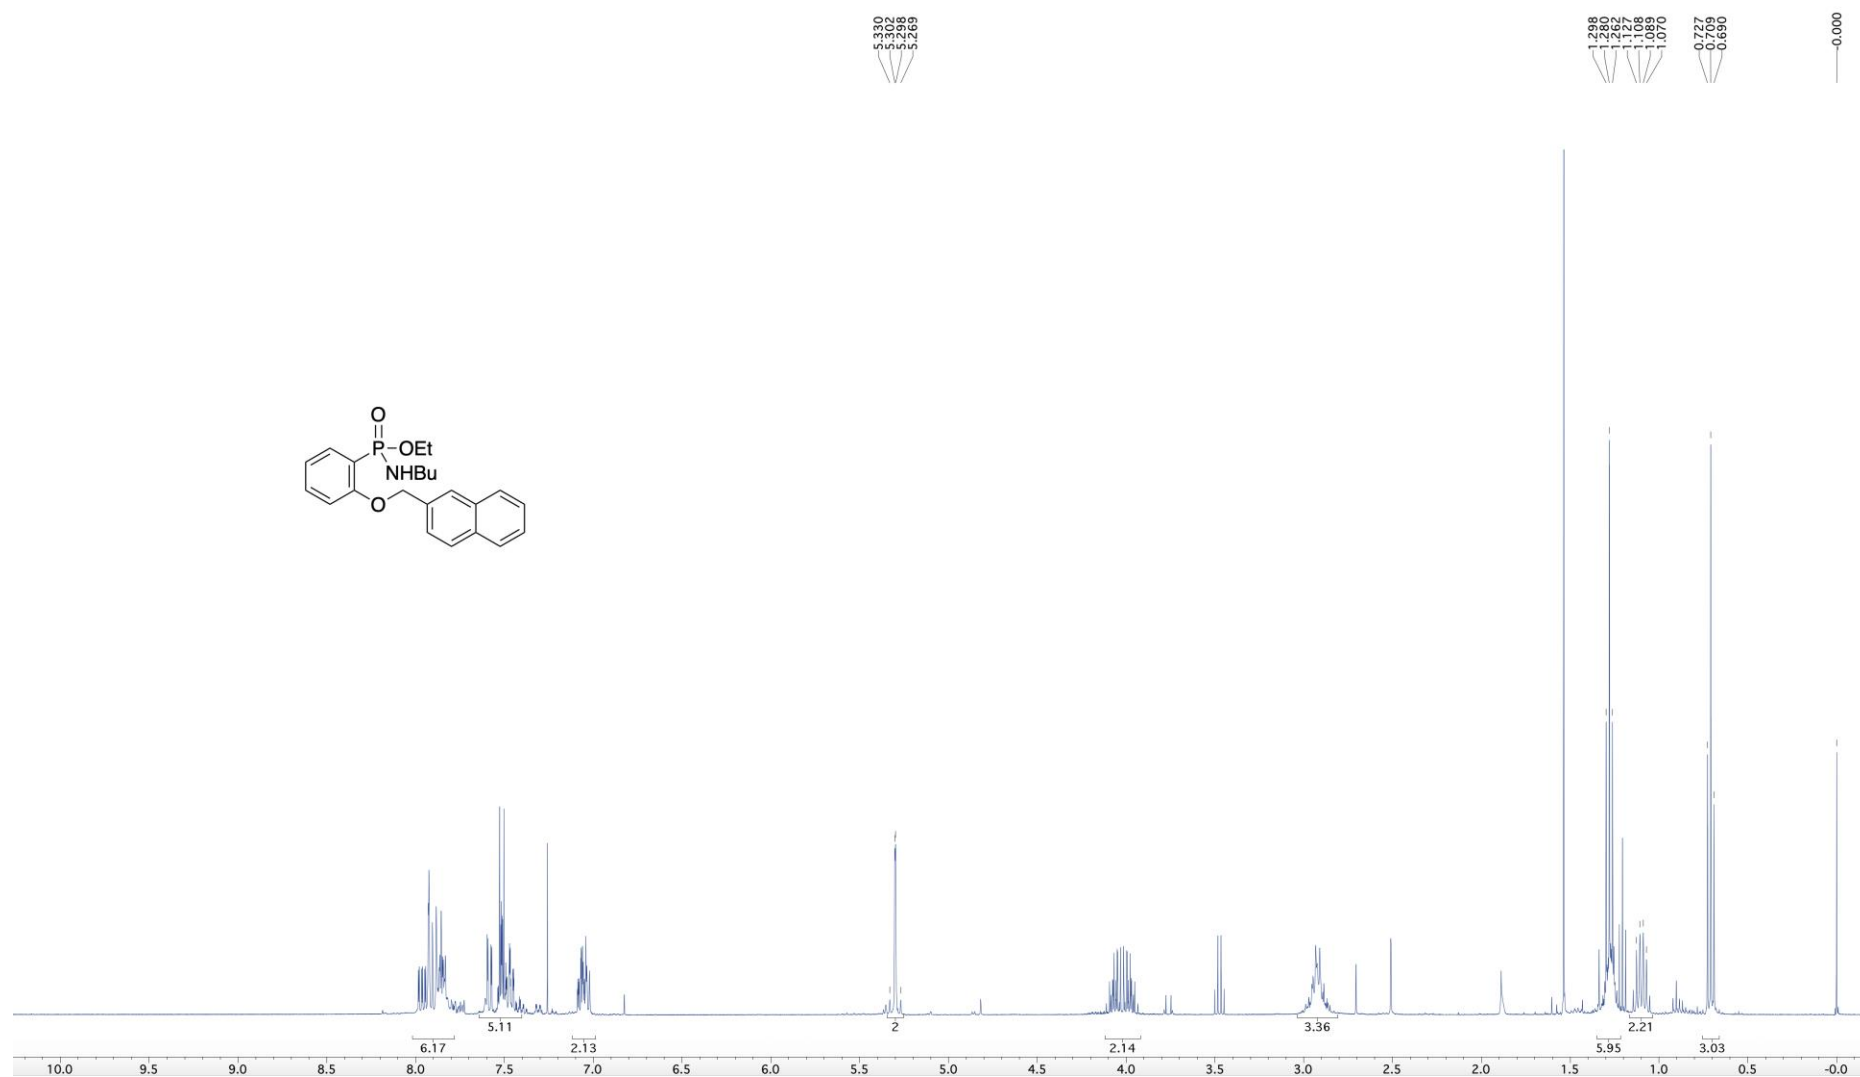

Figure S83. 162 MHz  $^{31}\text{P}$  NMR spectrum of **211**

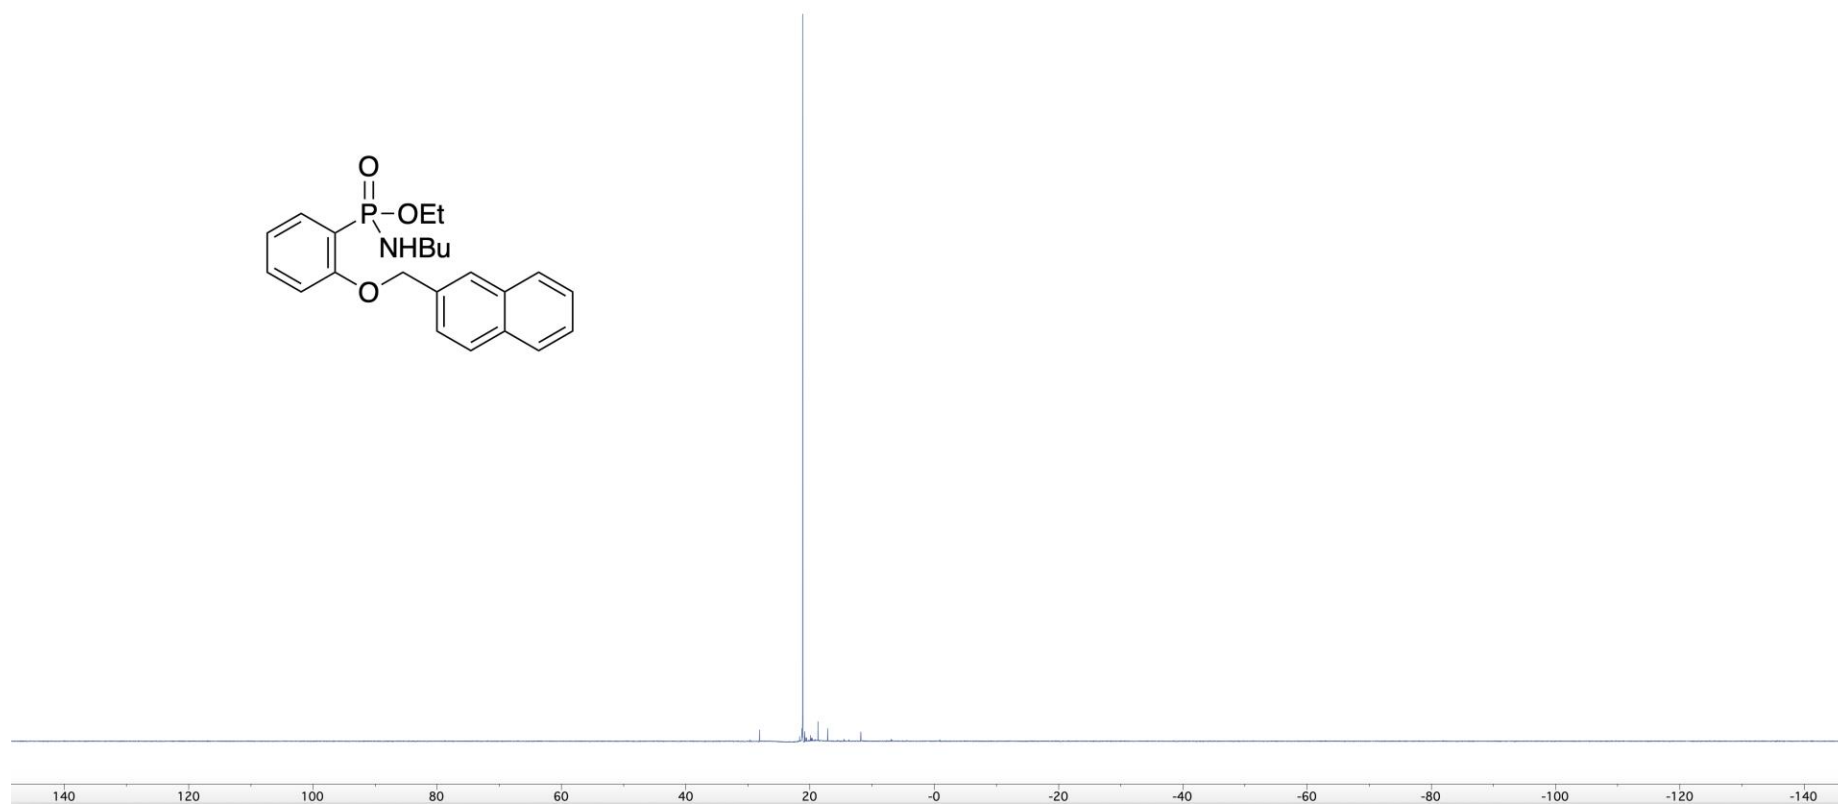

Chemical structure: CCOP(=O)(c1ccccc1)OCc2ccc3ccccc32

<sup>13</sup>C NMR spectrum (CDCl<sub>3</sub>) showing peaks at the following chemical shifts (ppm):

| Chemical Shift (ppm) |
|----------------------|
| 159.128              |
| 139.54               |
| 137.77               |
| 137.55               |
| 137.27               |
| 136.99               |
| 136.74               |
| 136.46               |
| 136.20               |
| 135.96               |
| 135.70               |
| 135.54               |
| 135.28               |
| 135.03               |
| 134.78               |
| 134.52               |
| 134.26               |
| 134.00               |
| 133.74               |
| 133.48               |
| 133.22               |
| 132.96               |
| 132.70               |
| 132.44               |
| 132.18               |
| 131.92               |
| 131.66               |
| 131.40               |
| 131.14               |
| 130.88               |
| 130.62               |
| 130.36               |
| 130.10               |
| 129.84               |
| 129.58               |
| 129.32               |
| 129.06               |
| 128.80               |
| 128.54               |
| 128.28               |
| 128.02               |
| 127.76               |
| 127.50               |
| 127.24               |
| 126.98               |
| 126.72               |
| 126.46               |
| 126.20               |
| 125.94               |
| 125.68               |
| 125.42               |
| 125.16               |
| 124.90               |
| 124.64               |
| 124.38               |
| 124.12               |
| 123.86               |
| 123.60               |
| 123.34               |
| 123.08               |
| 122.82               |
| 122.56               |
| 122.30               |
| 122.04               |
| 121.78               |
| 121.52               |
| 121.26               |
| 121.00               |
| 120.74               |
| 120.48               |
| 120.22               |
| 119.96               |
| 119.70               |
| 119.44               |
| 119.18               |
| 118.92               |
| 118.66               |
| 118.40               |
| 118.14               |
| 117.88               |
| 117.62               |
| 117.36               |
| 117.10               |
| 116.84               |
| 116.58               |
| 116.32               |
| 116.06               |
| 115.80               |
| 115.54               |
| 115.28               |
| 115.02               |
| 114.76               |
| 114.50               |
| 114.24               |
| 113.98               |
| 113.72               |
| 113.46               |
| 113.20               |
| 112.94               |
| 112.68               |
| 112.42               |
| 112.16               |
| 111.90               |
| 111.64               |
| 111.38               |
| 111.12               |
| 110.86               |
| 110.60               |
| 110.34               |
| 110.08               |
| 109.82               |
| 109.56               |
| 109.30               |
| 109.04               |
| 108.78               |
| 108.52               |
| 108.26               |
| 108.00               |
| 107.74               |
| 107.48               |
| 107.22               |
| 106.96               |
| 106.70               |
| 106.44               |
| 106.18               |
| 105.92               |
| 105.66               |
| 105.40               |
| 105.14               |
| 104.88               |
| 104.62               |
| 104.36               |
| 104.10               |
| 103.84               |
| 103.58               |
| 103.32               |
| 103.06               |
| 102.80               |
| 102.54               |
| 102.28               |
| 102.02               |
| 101.76               |
| 101.50               |
| 101.24               |
| 100.98               |
| 100.72               |
| 100.46               |
| 100.20               |
| 99.94                |
| 99.68                |
| 99.42                |
| 99.16                |
| 98.90                |
| 98.64                |
| 98.38                |
| 98.12                |
| 97.86                |
| 97.60                |
| 97.34                |
| 97.08                |
| 96.82                |
| 96.56                |
| 96.30                |
| 96.04                |
| 95.78                |
| 95.52                |
| 95.26                |
| 95.00                |
| 94.74                |
| 94.48                |
| 94.22                |
| 93.96                |
| 93.70                |
| 93.44                |
| 93.18                |
| 92.92                |
| 92.66                |
| 92.40                |
| 92.14                |
| 91.88                |
| 91.62                |
| 91.36                |
| 91.10                |
| 90.84                |
| 90.58                |
| 90.32                |
| 90.06                |
| 89.80                |
| 89.54                |
| 89.28                |
| 89.02                |
| 88.76                |
| 88.50                |
| 88.24                |
| 87.98                |
| 87.72                |
| 87.46                |
| 87.20                |
| 86.94                |
| 86.68                |
| 86.42                |
| 86.16                |
| 85.90                |
| 85.64                |
| 85.38                |
| 85.12                |
| 84.86                |
| 84.60                |
| 84.34                |
| 84.08                |
| 83.82                |
| 83.56                |
| 83.30                |
| 83.04                |
| 82.78                |
| 82.52                |
| 82.26                |
| 82.00                |
| 81.74                |
| 81.48                |
| 81.22                |
| 80.96                |
| 80.70                |
| 80.44                |
| 80.18                |
| 79.92                |
| 79.66                |
| 79.40                |
| 79.14                |
| 78.88                |
| 78.62                |
| 78.36                |
| 78.10                |
| 77.84                |
| 77.58                |
| 77.32                |
| 77.06                |
| 76.80                |
| 76.54                |
| 76.28                |
| 76.02                |
| 75.76                |
| 75.50                |
| 75.24                |
| 74.98                |
| 74.72                |
| 74.46                |
| 74.20                |
| 73.94                |
| 73.68                |
| 73.42                |
| 73.16                |
| 72.90                |
| 72.64                |
| 72.38                |
| 72.12                |
| 71.86                |
| 71.60                |
| 71.34                |
| 71.08                |
| 70.82                |
| 70.56                |
| 70.30                |
| 70.04                |
| 69.78                |
| 69.52                |
| 69.26                |
| 69.00                |
| 68.74                |
| 68.48                |
|                      |

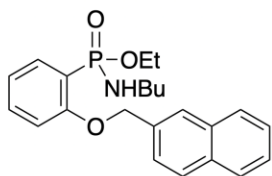

CCOP(=O)(c1ccccc1)OCc2ccsc2

Chemical structure of the compound is shown above the spectrum. The structure is a phosphonate ester derivative, specifically ethyl 2-(2-(benzyloxy)thiophen-5-yl)phosphonate, which is a derivative of the active ingredient in the pesticide mentioned in the text.

The  $^1\text{H}$  NMR spectrum (CDCl<sub>3</sub>) shows the following peaks and integrations:

| Chemical Shift (ppm) | Integration |
|----------------------|-------------|
| ~8.0                 | 1.06        |
| ~7.2                 | 1.02        |
| ~7.0                 | 4.32        |
| ~5.3                 | 2.06        |
| ~4.0                 | 2.33        |
| ~3.0                 | 3.55        |
| ~1.3                 | 8.27        |
| ~1.0                 | 3.18        |

The spectrum displays characteristic signals for the compound, including aromatic protons (7.0-8.0 ppm), the thiophene ring protons (5.3 ppm), the benzyloxy group protons (4.0 ppm), the ethyl group protons (3.0 ppm), and the phosphonate group protons (1.0-1.3 ppm).

Figure S86. 162 MHz  $^{31}\text{P}$  NMR spectrum of **21m**

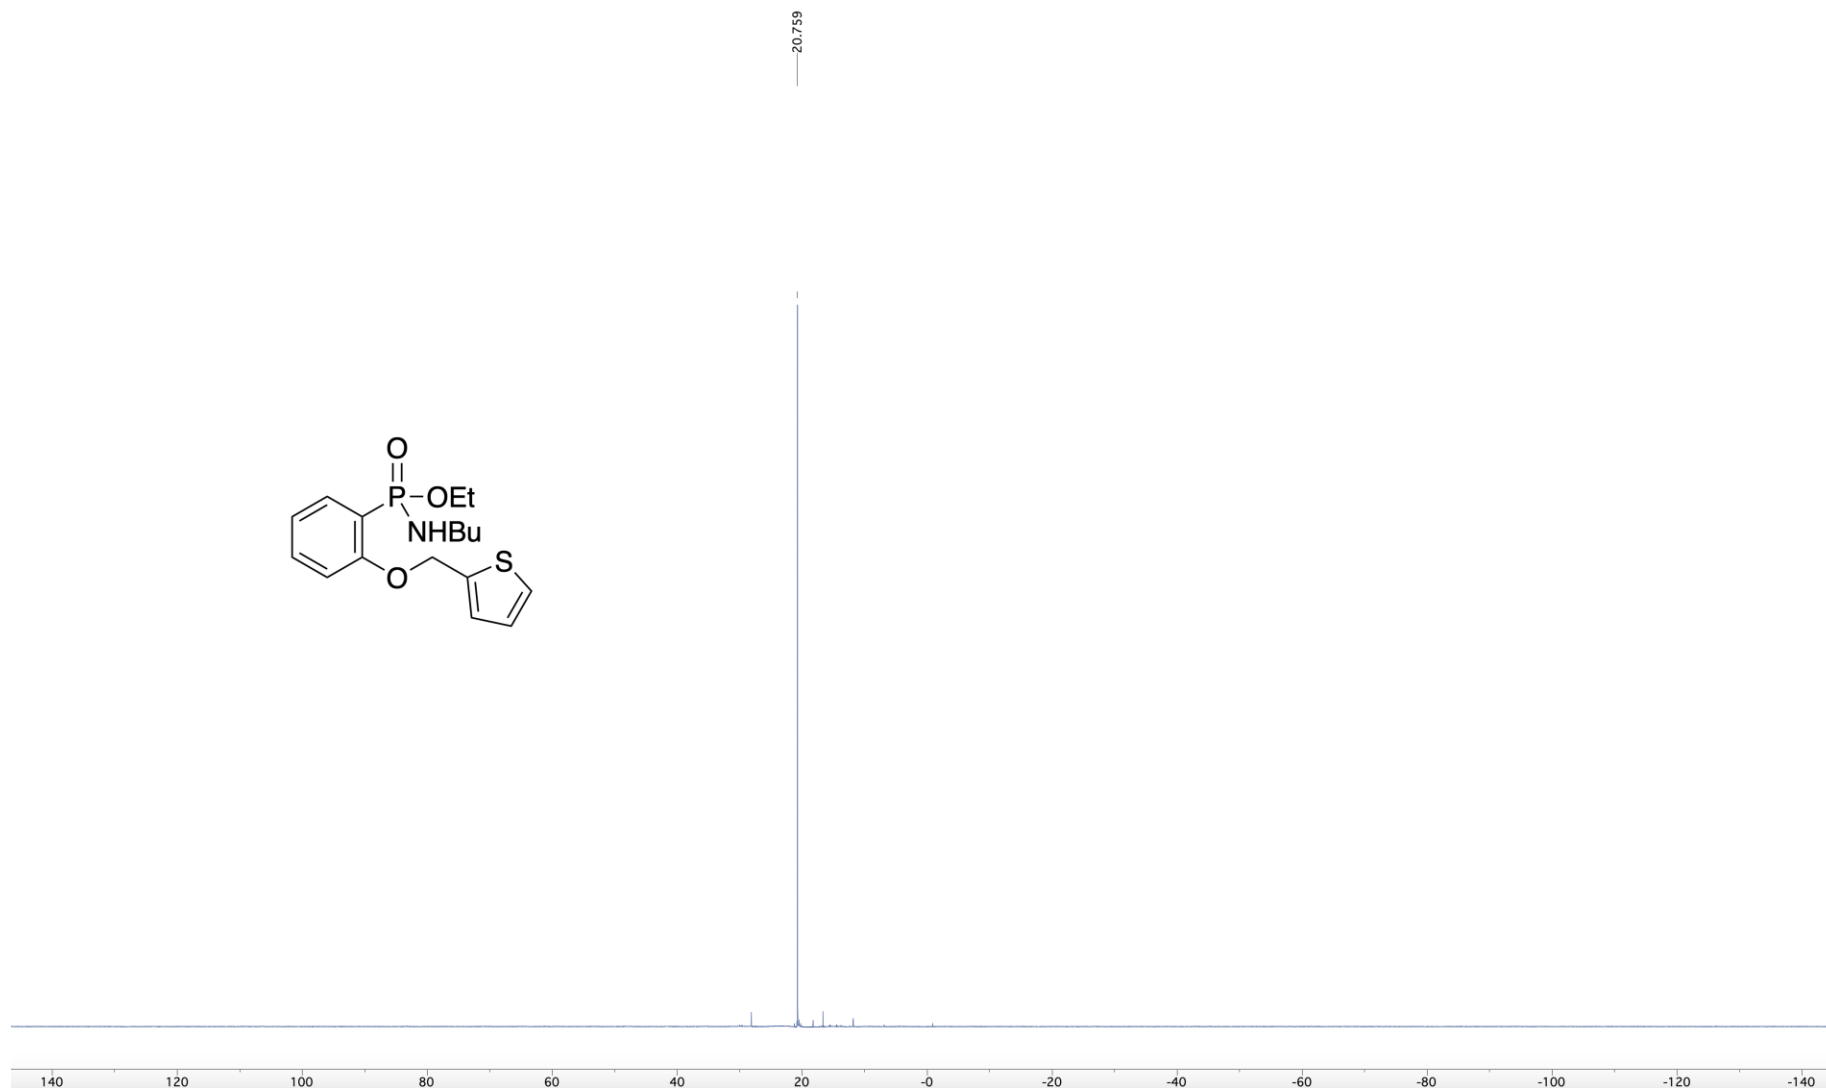

Figure S87. 100 MHz DEPTQ  $^{13}\text{C}$  NMR spectrum of **21m**

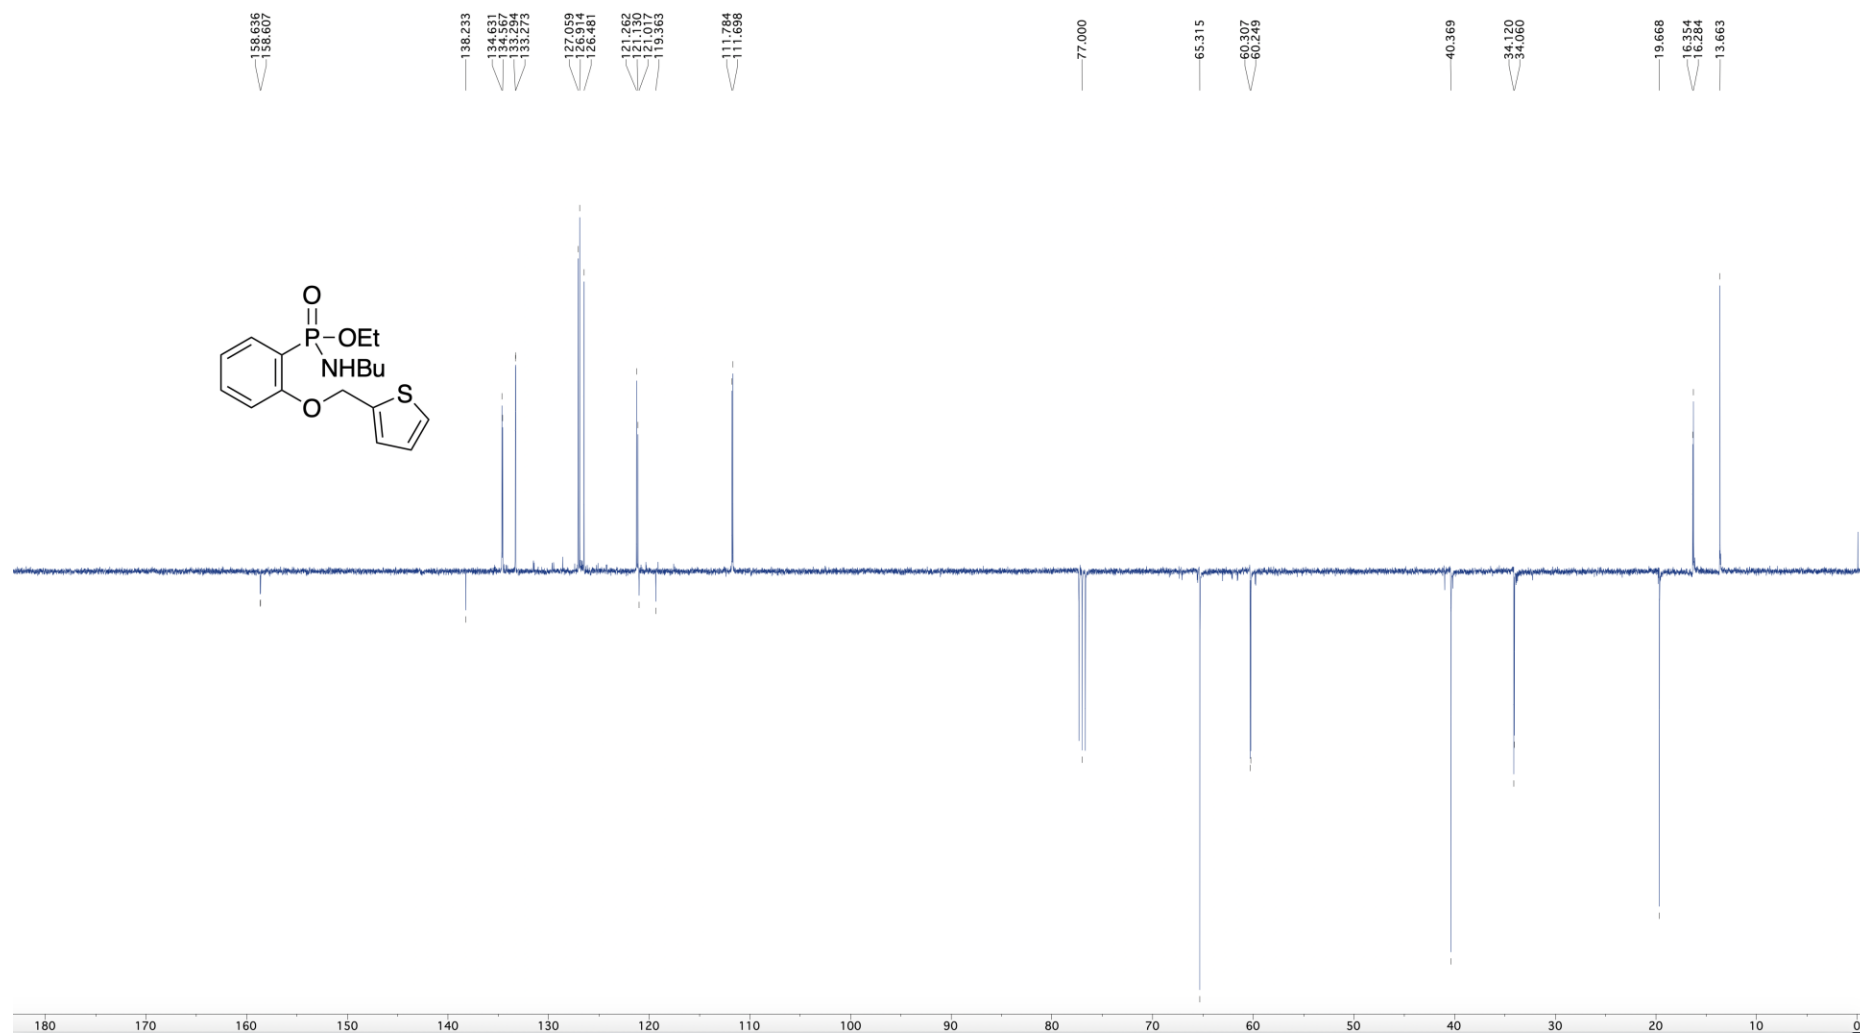

Figure S88. 400 MHz  $^1\text{H}$  NMR spectrum of **23c**

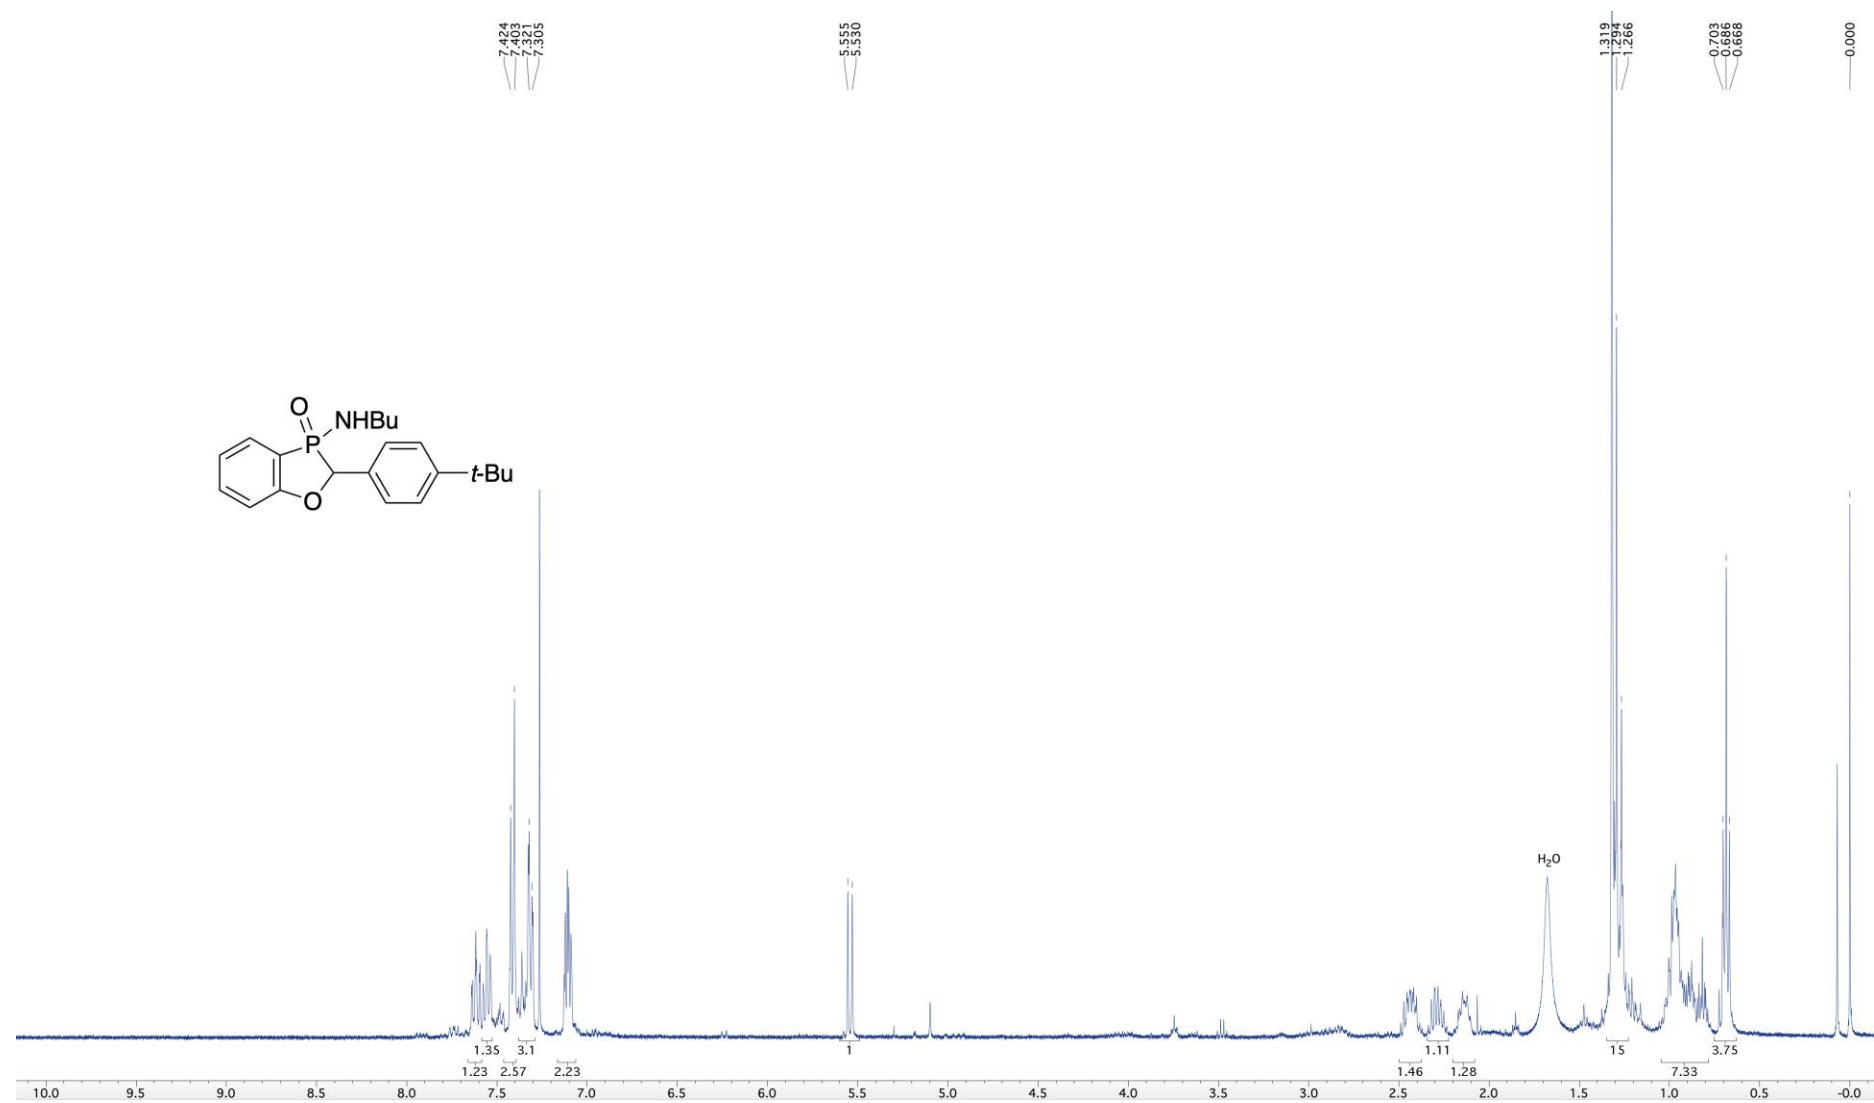

Figure S89. 162 MHz  $^{31}\text{P}$  NMR spectrum of **23c**

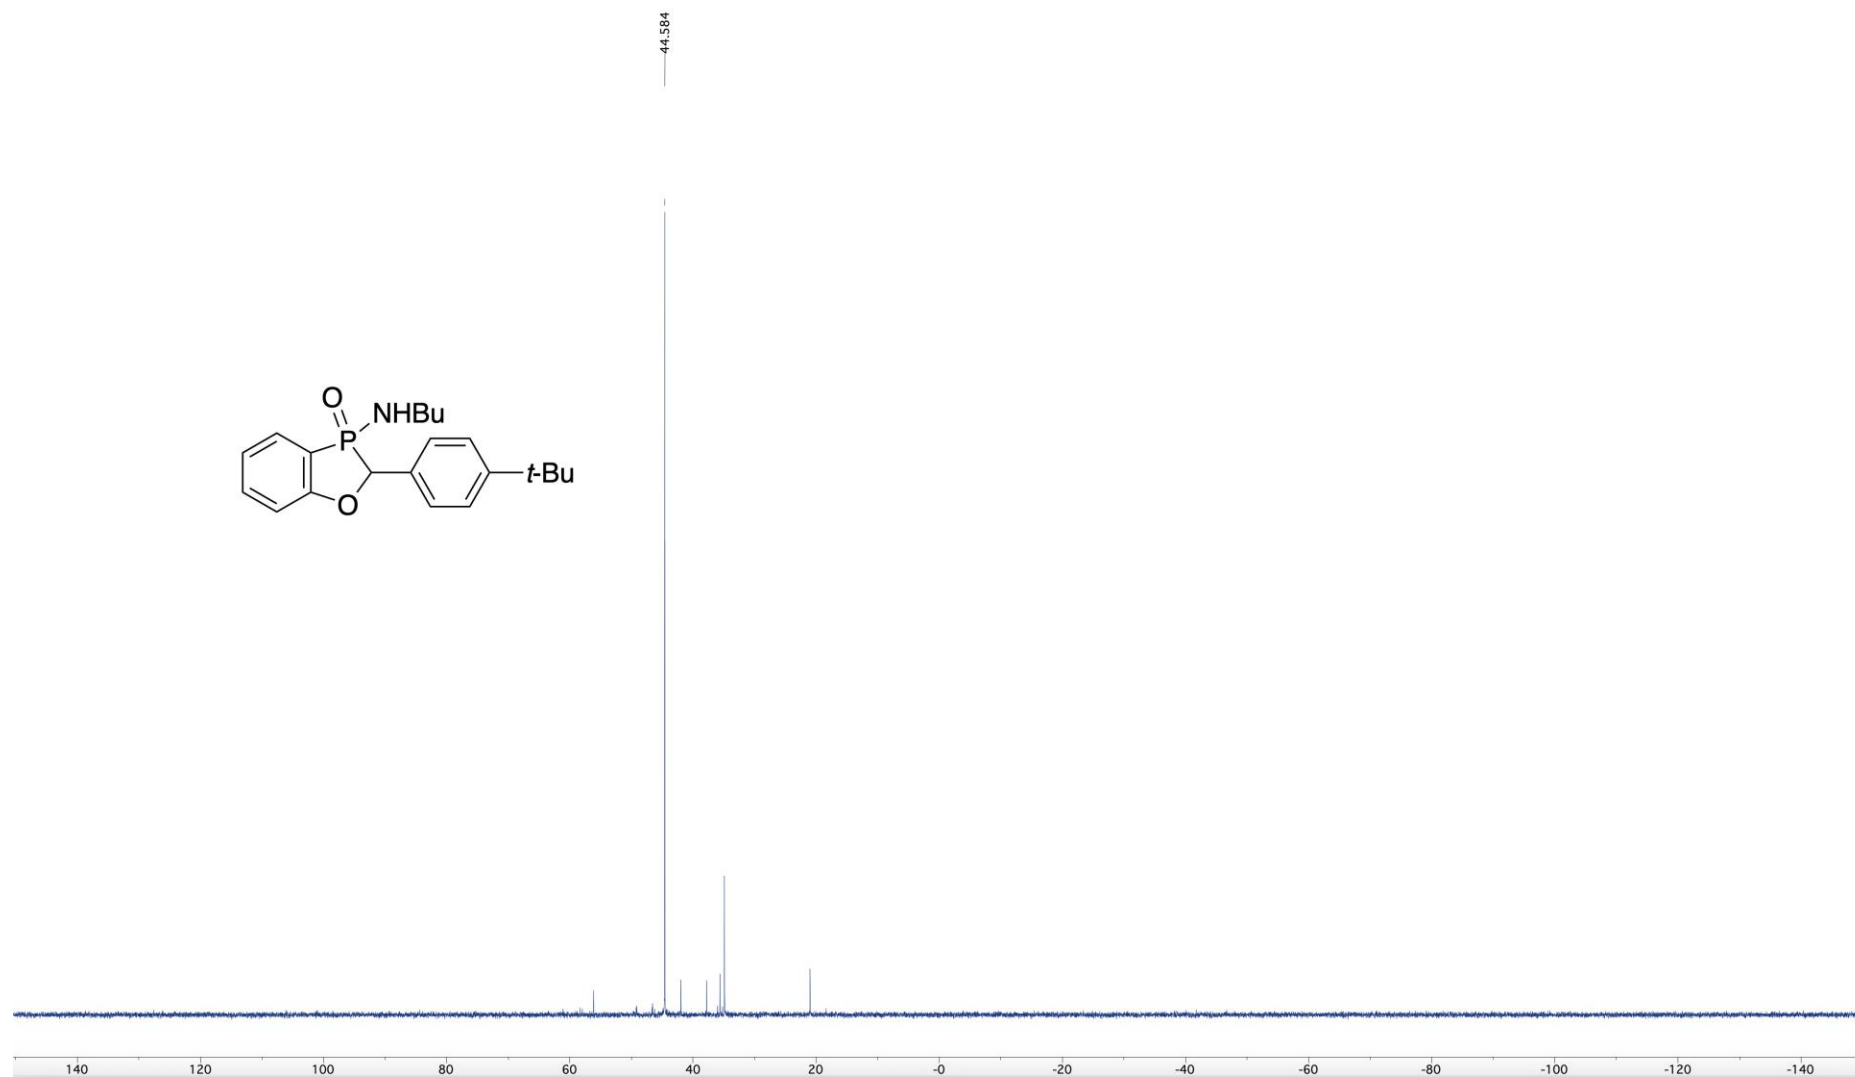



Figure S90. 176 MHz DEPTQ  $^{13}\text{C}$  NMR spectrum of **23c**

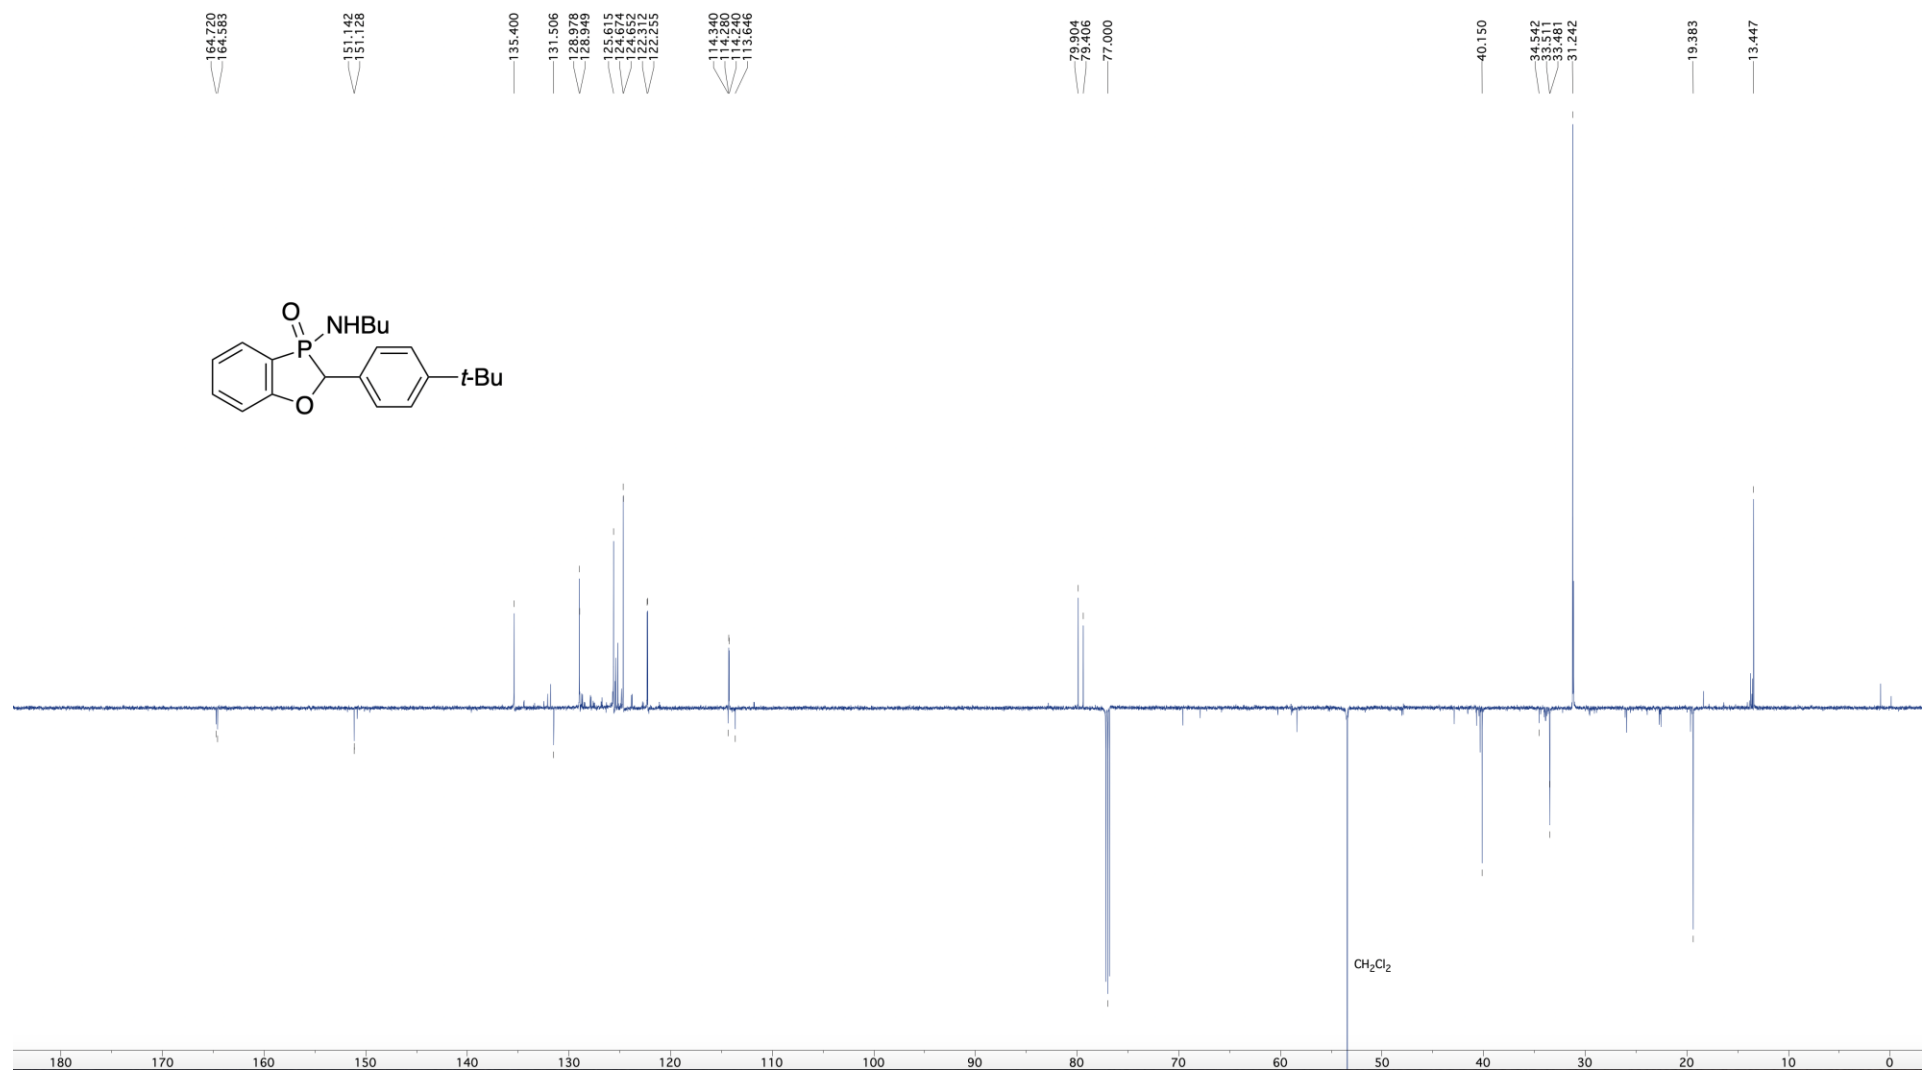

Figure S91. 400 MHz  $^1\text{H}$  NMR spectrum of **23d**

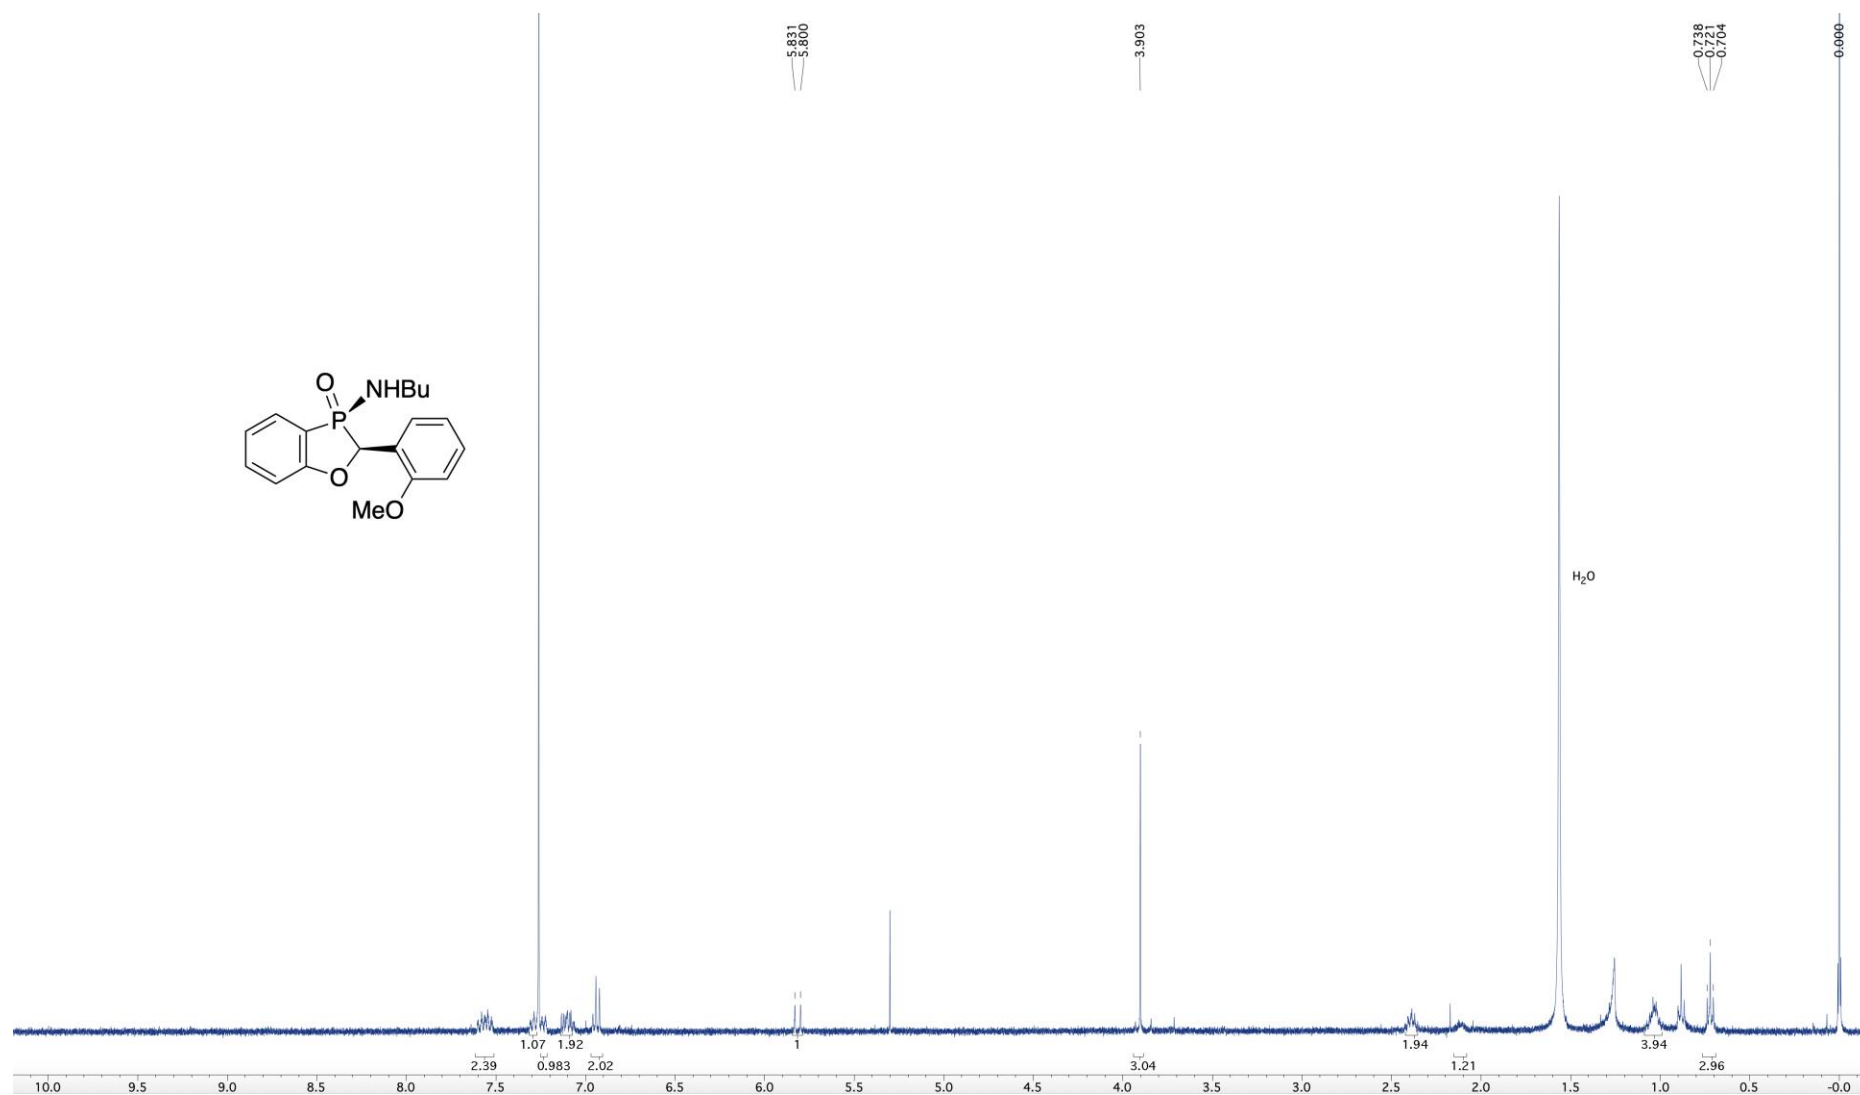

Figure S92. 162 MHz  $^{31}\text{P}$  NMR spectrum of **23d**

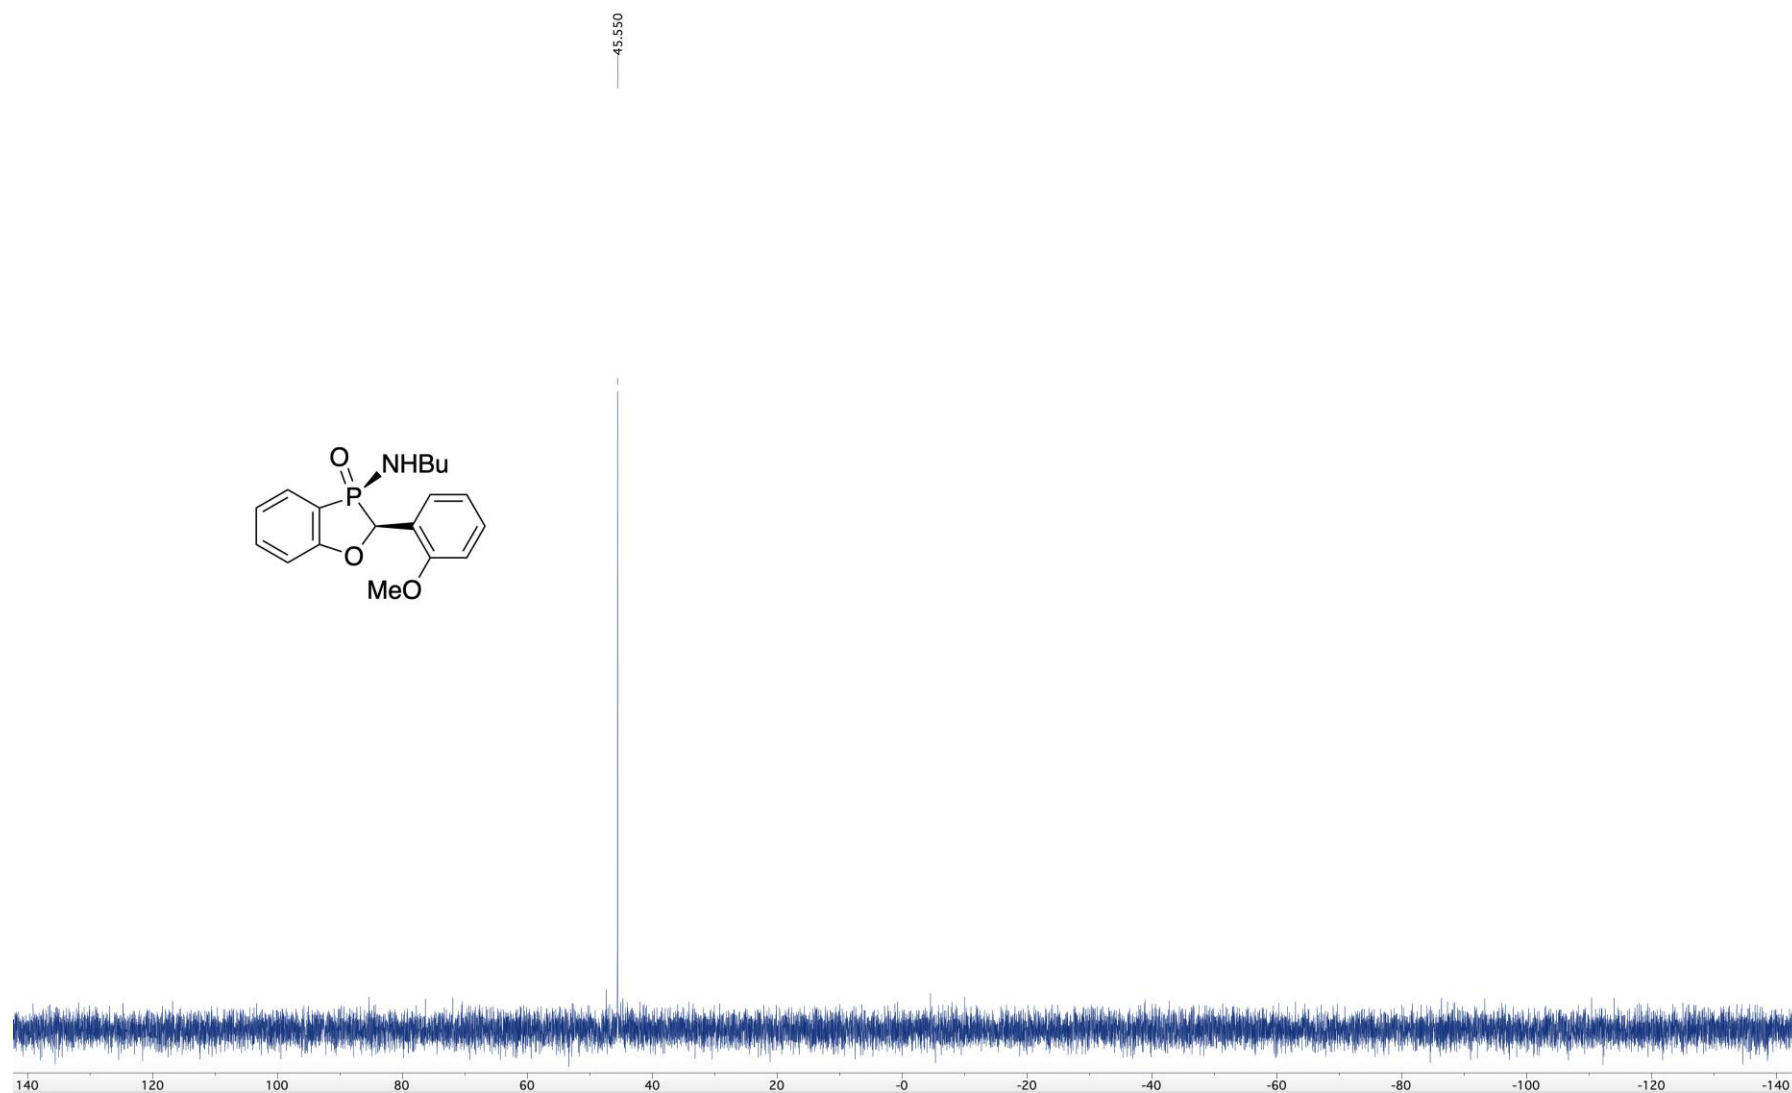

Figure S93. 400 MHz  $^1\text{H}$  NMR spectrum of **23e**

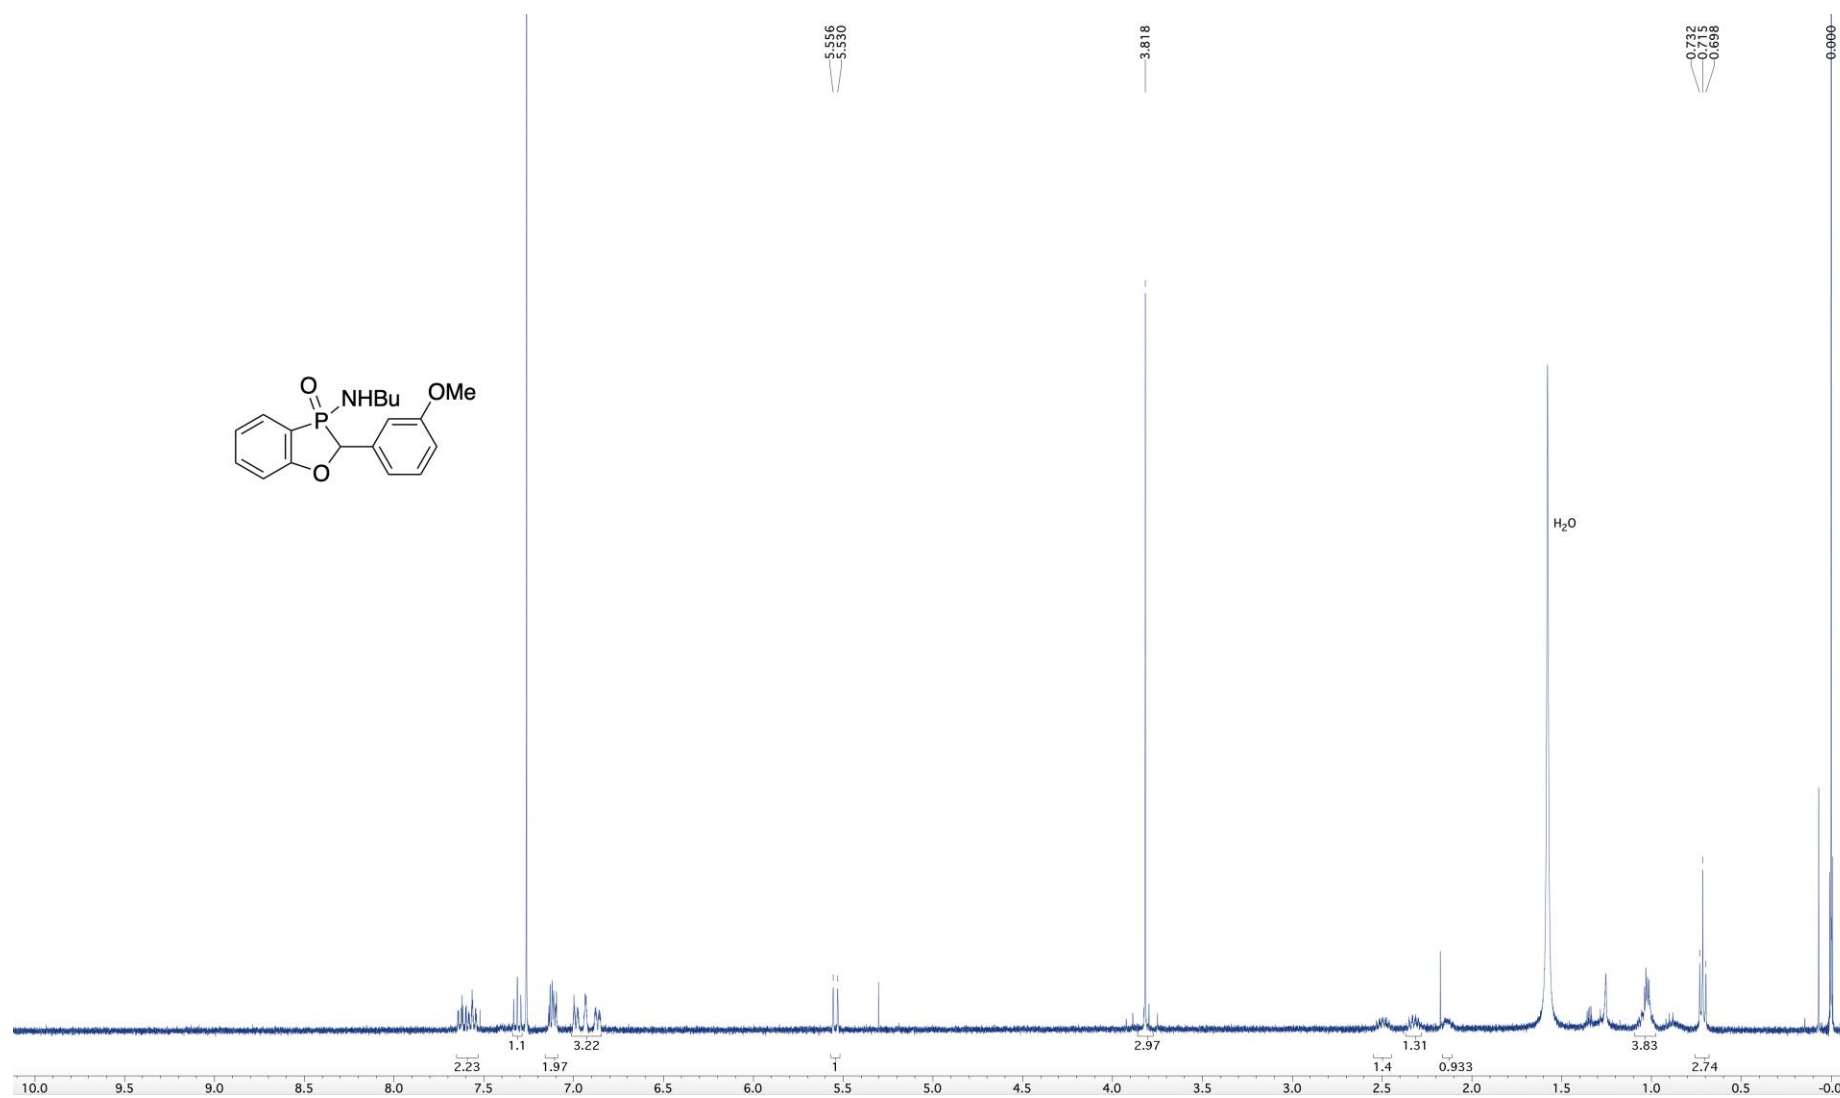

Figure S94. 162 MHz  $^{31}\text{P}$  NMR spectrum of **23e**

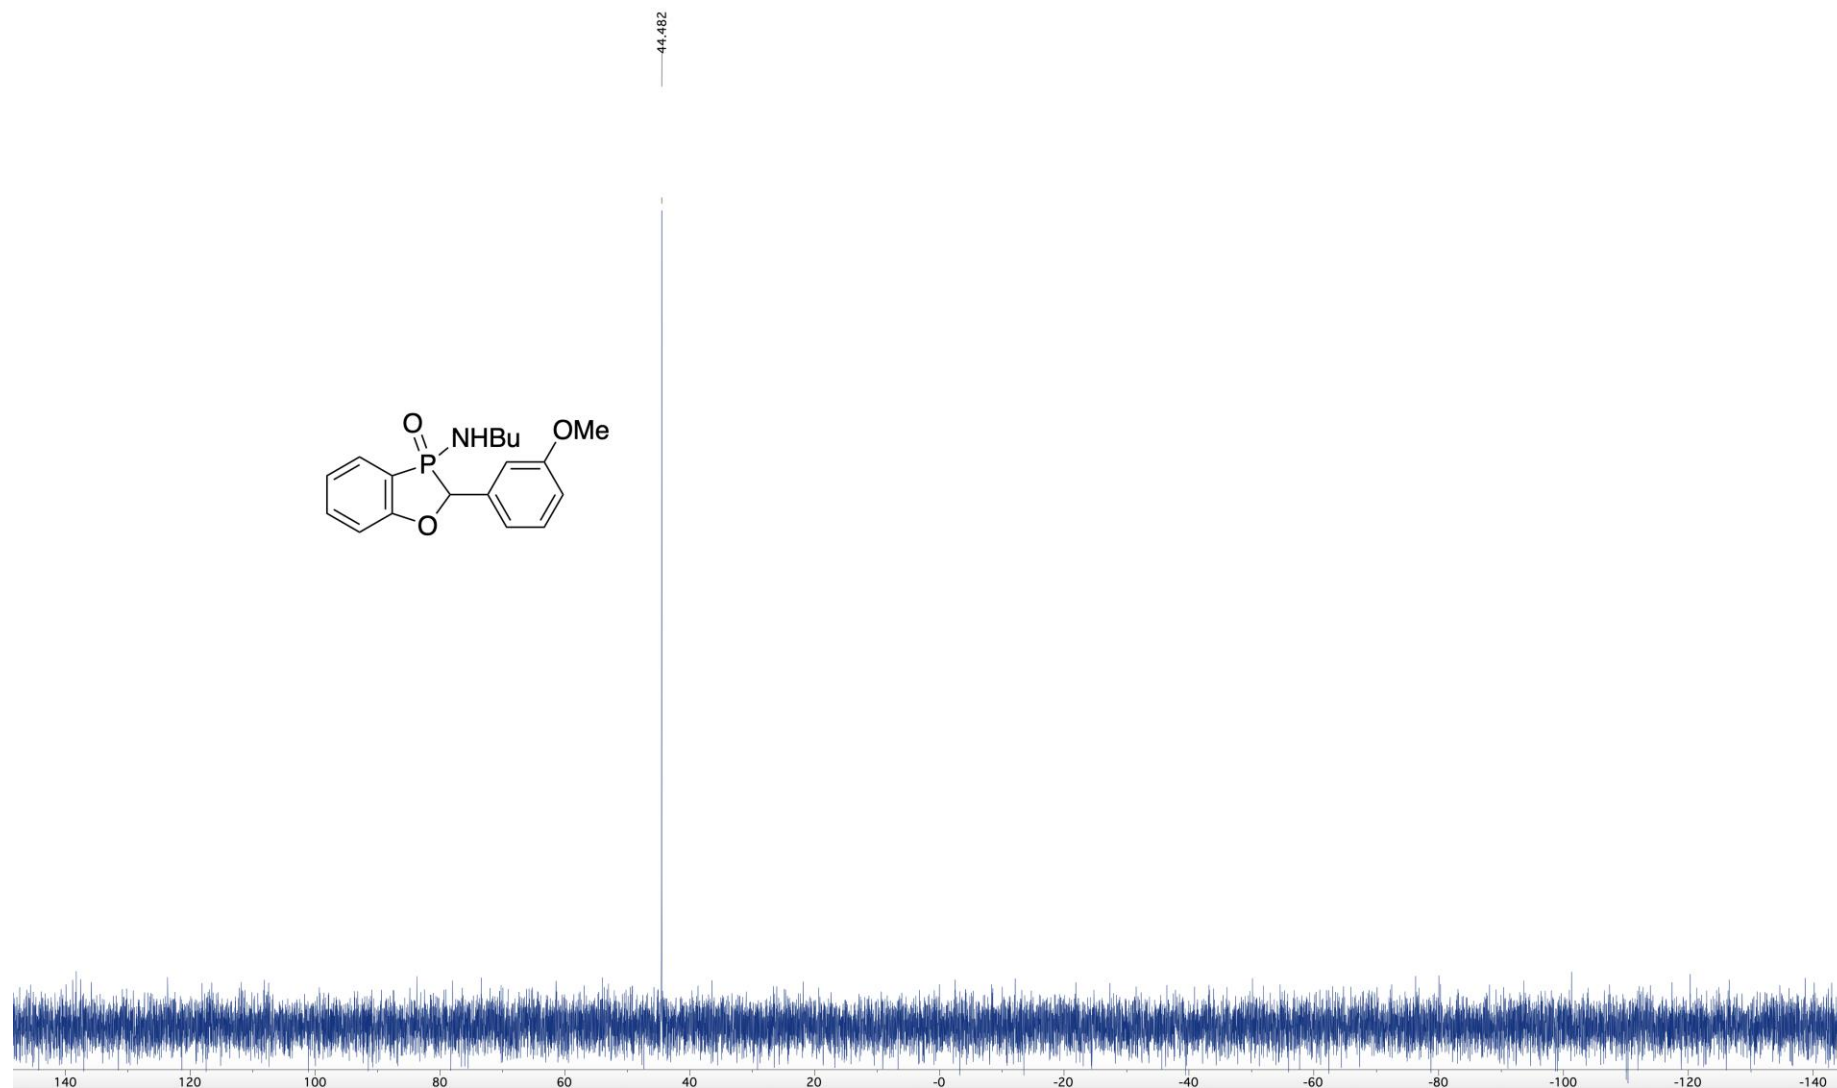

Figure S95. 400 MHz  $^1\text{H}$  NMR spectrum of **23g**

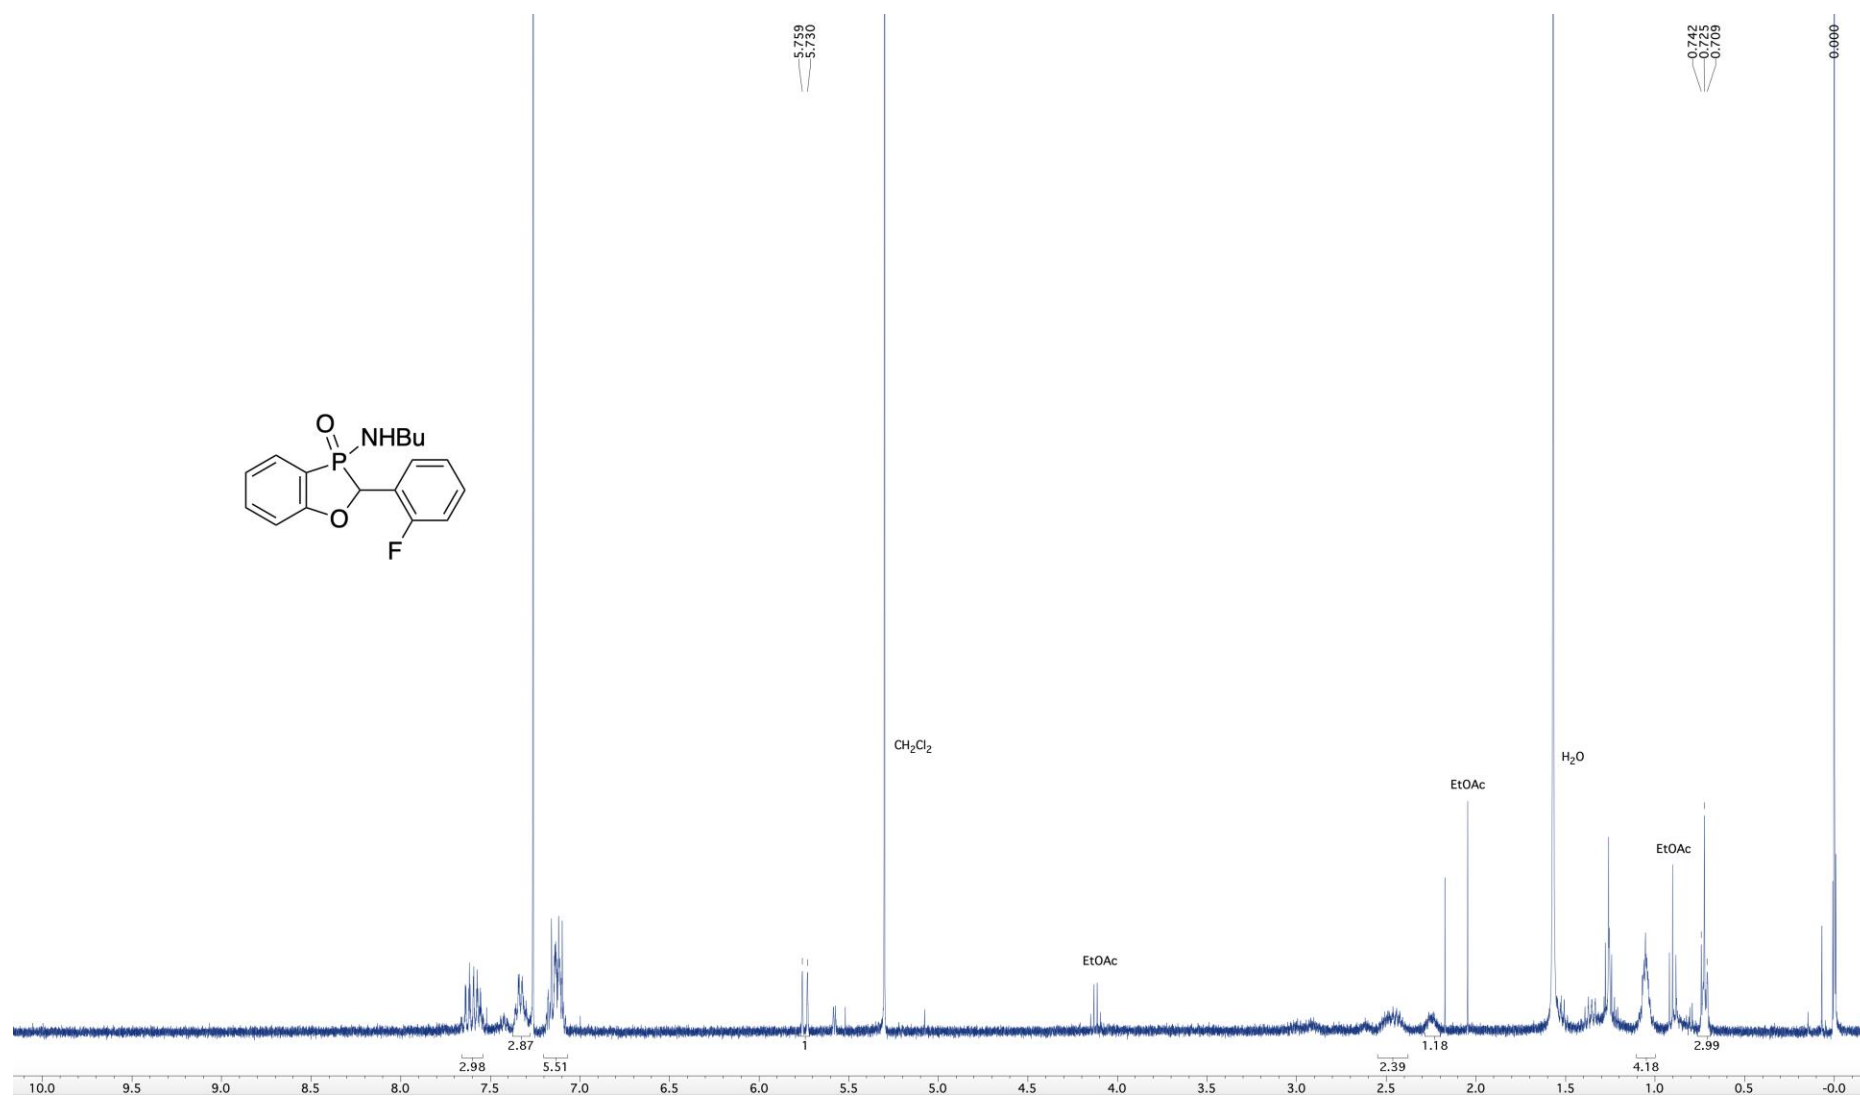

Figure S96. 162 MHz  $^{31}\text{P}$  NMR spectrum of **23g**

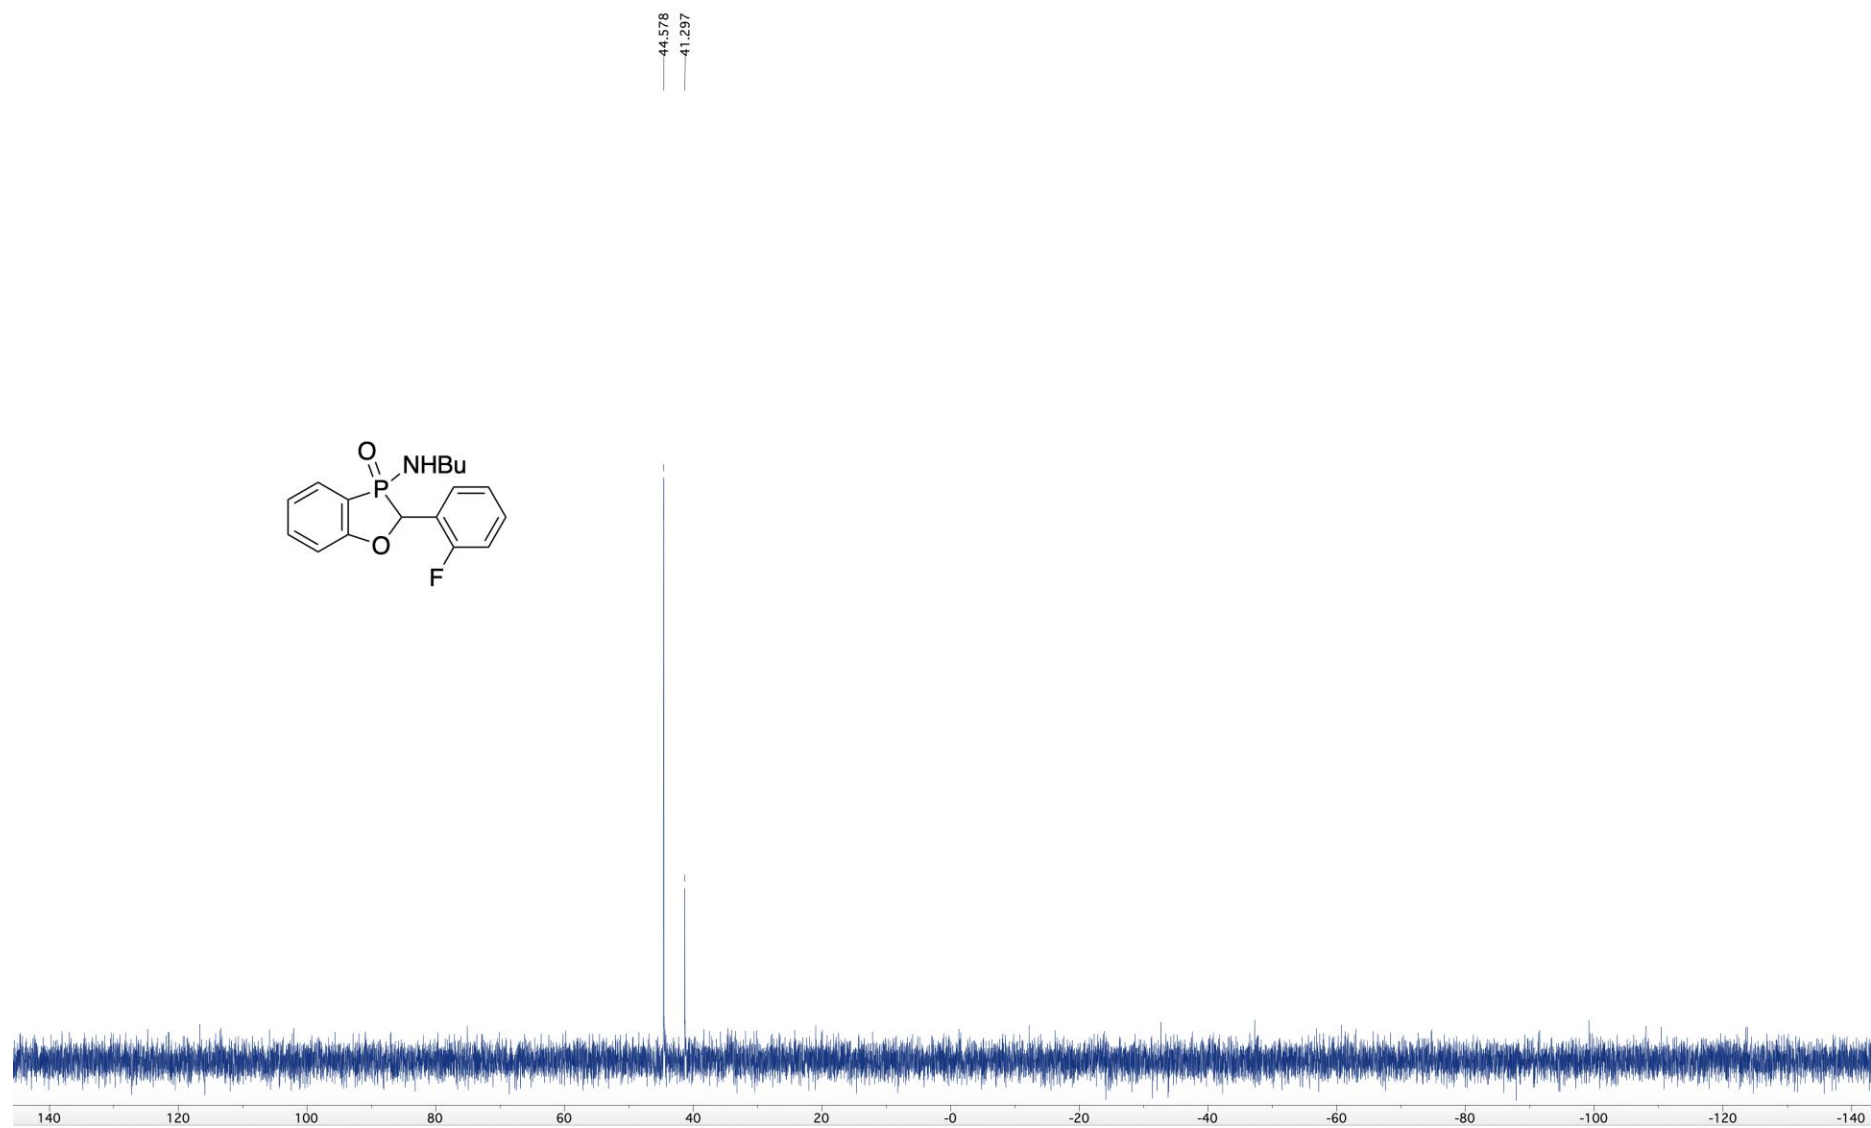

Figure S97. 400 MHz  $^1\text{H}$  NMR spectrum of **23h**

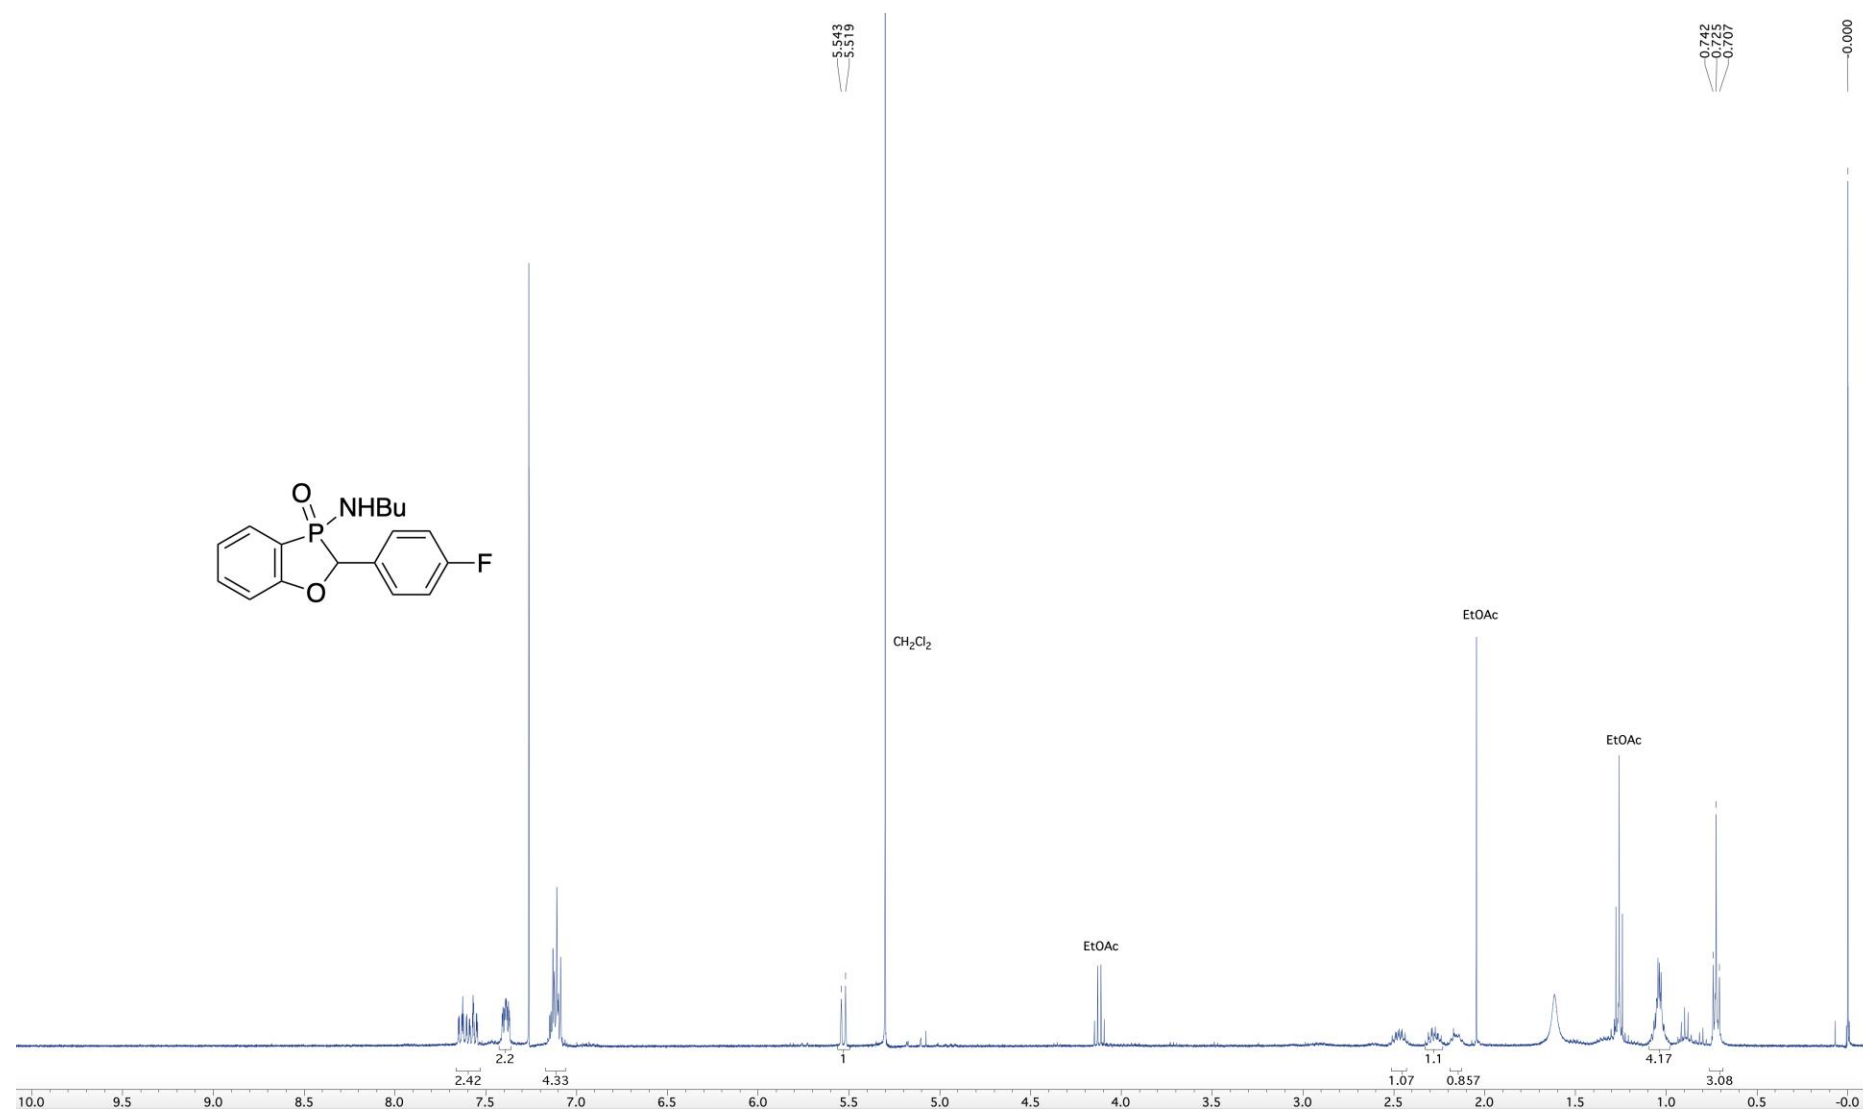



Figure S98. 162 MHz  $^{31}\text{P}$  NMR spectrum of **23h**

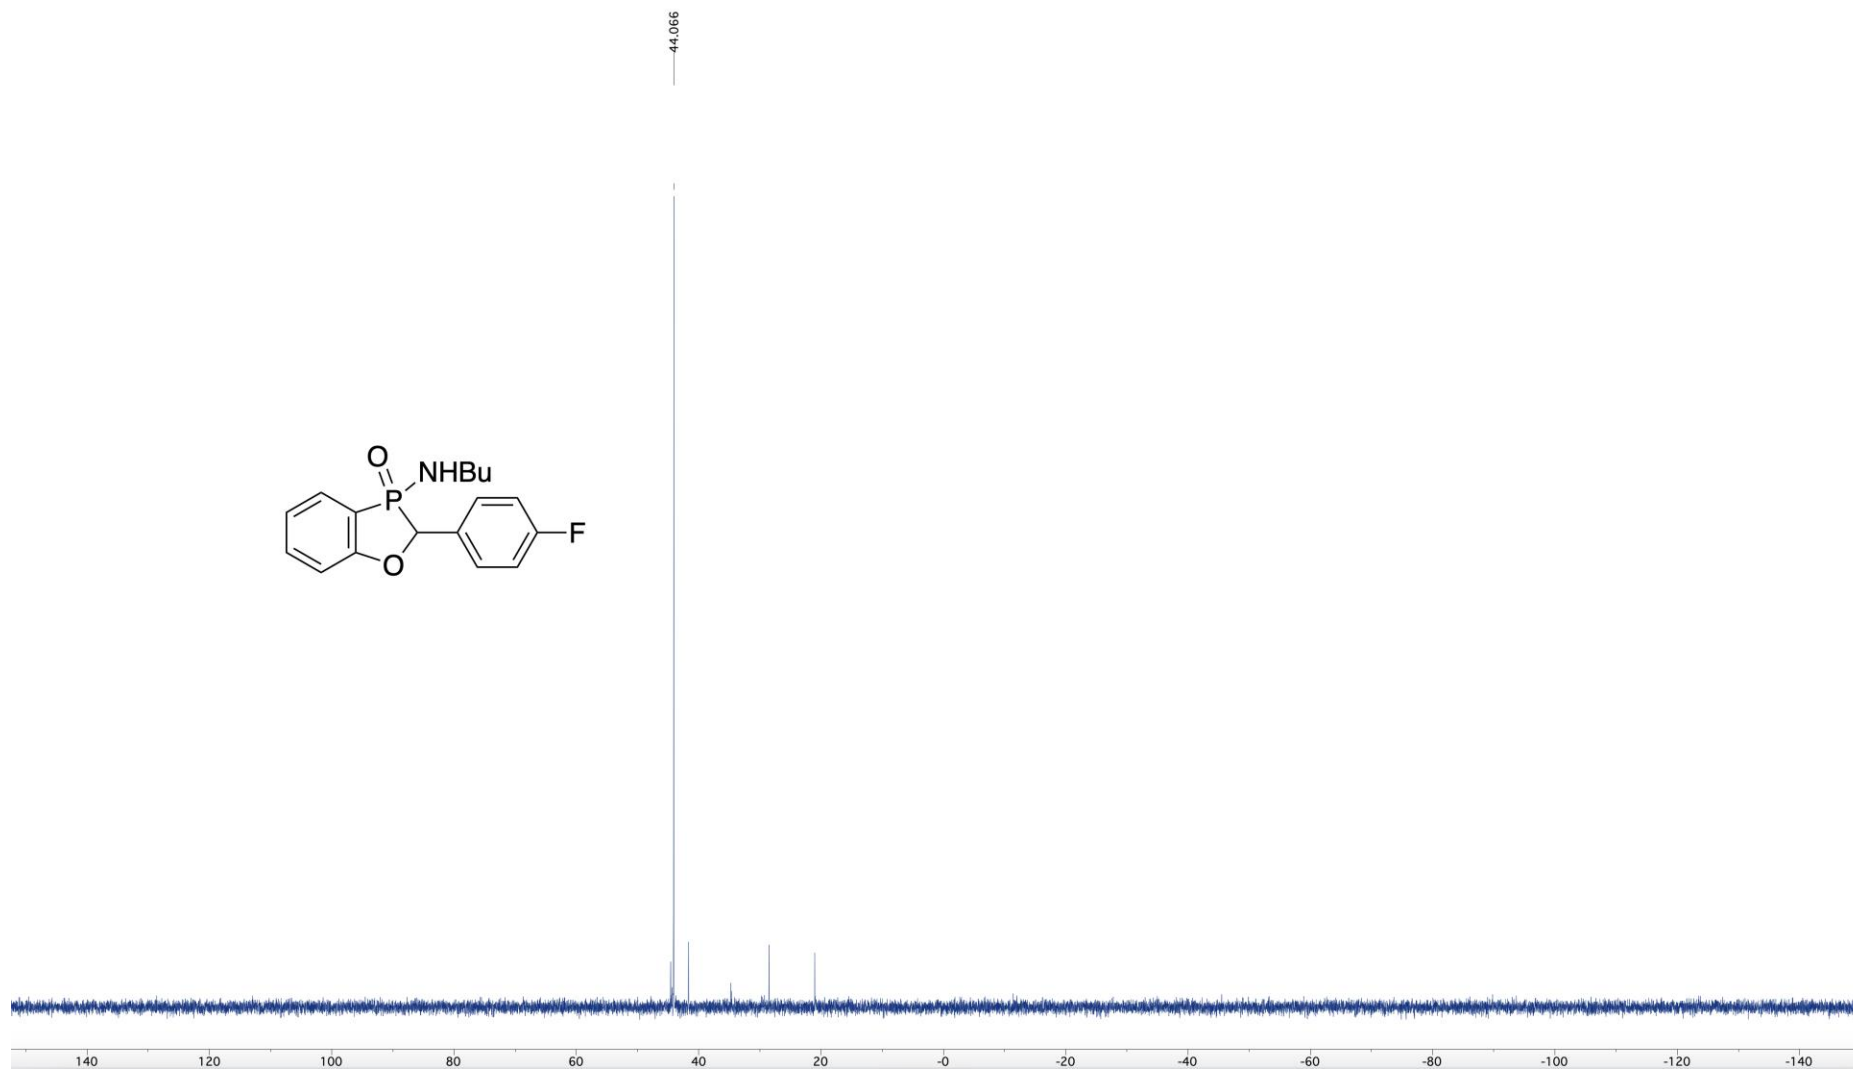

Figure S99. 100 MHz DEPTQ  $^{13}\text{C}$  NMR spectrum of **23h**

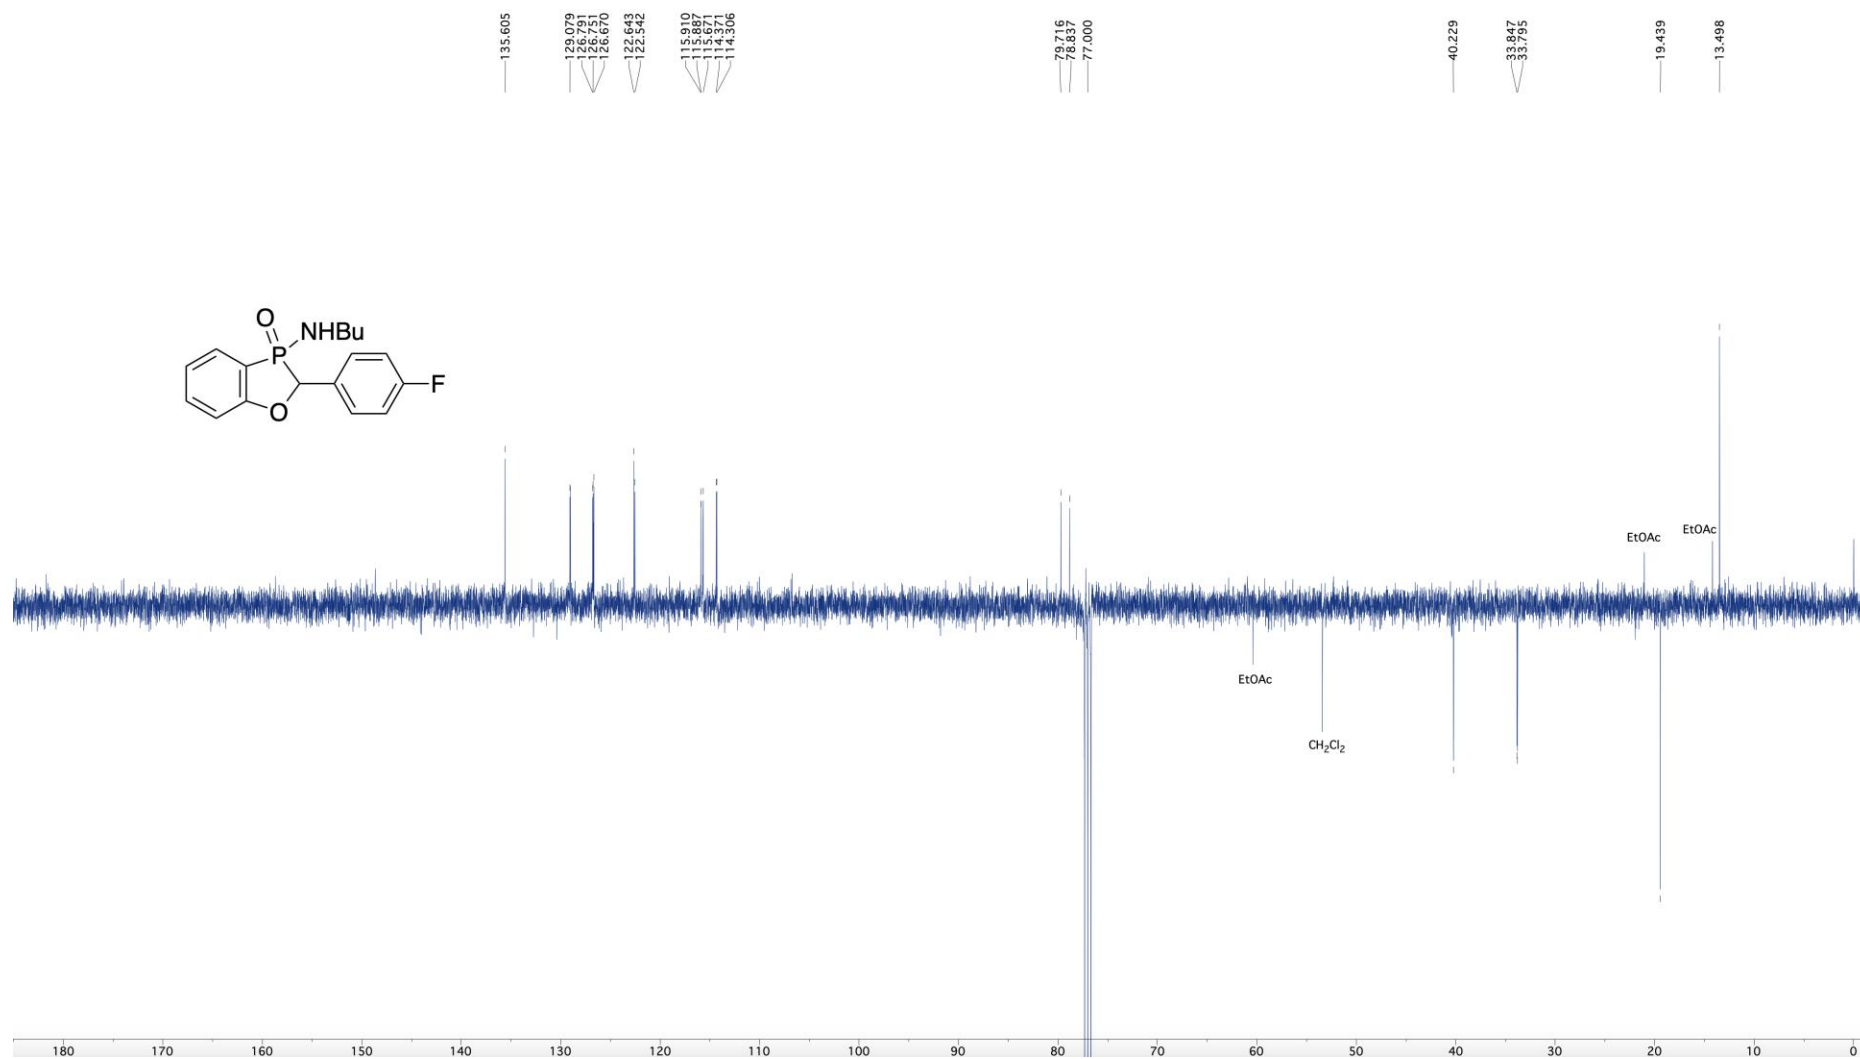

Figure S100. 162 MHz  $^{31}\text{P}$  NMR spectrum of **23k**

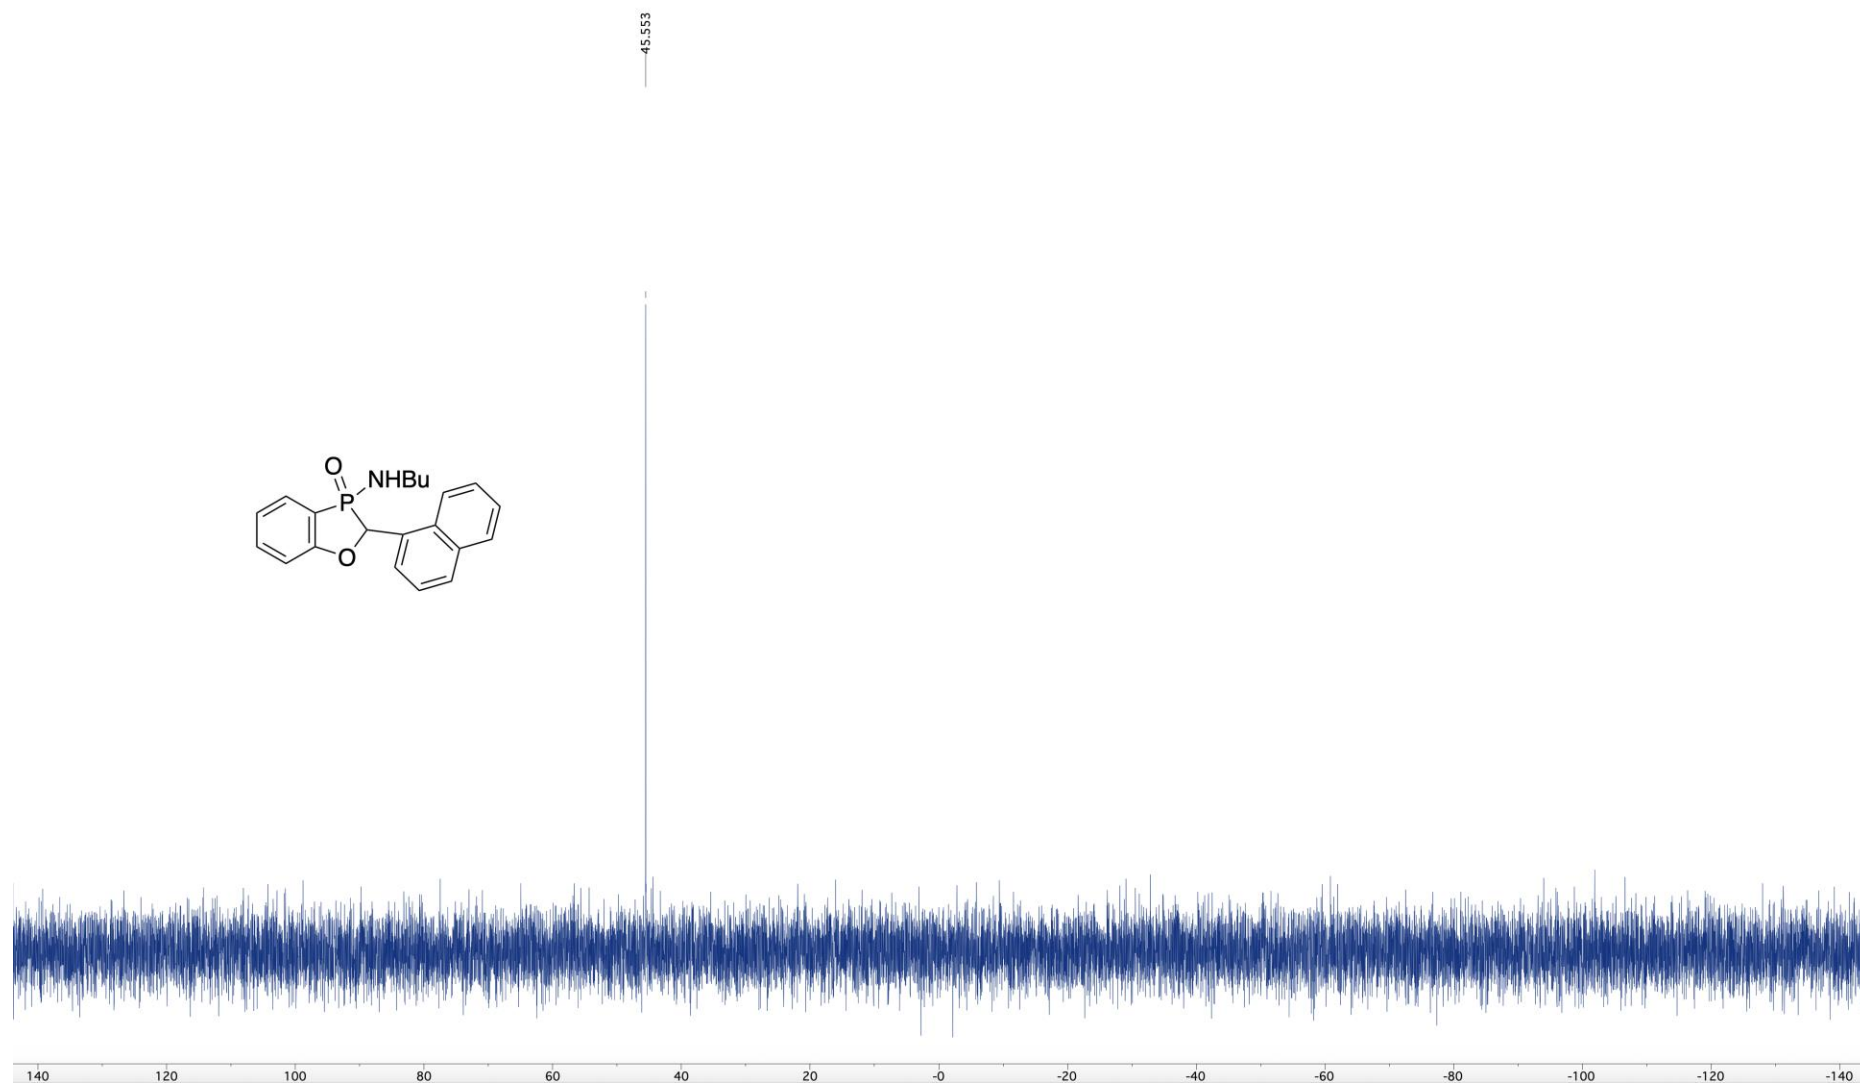

Figure S101. 400 MHz  $^1\text{H}$  NMR spectrum of **23l**

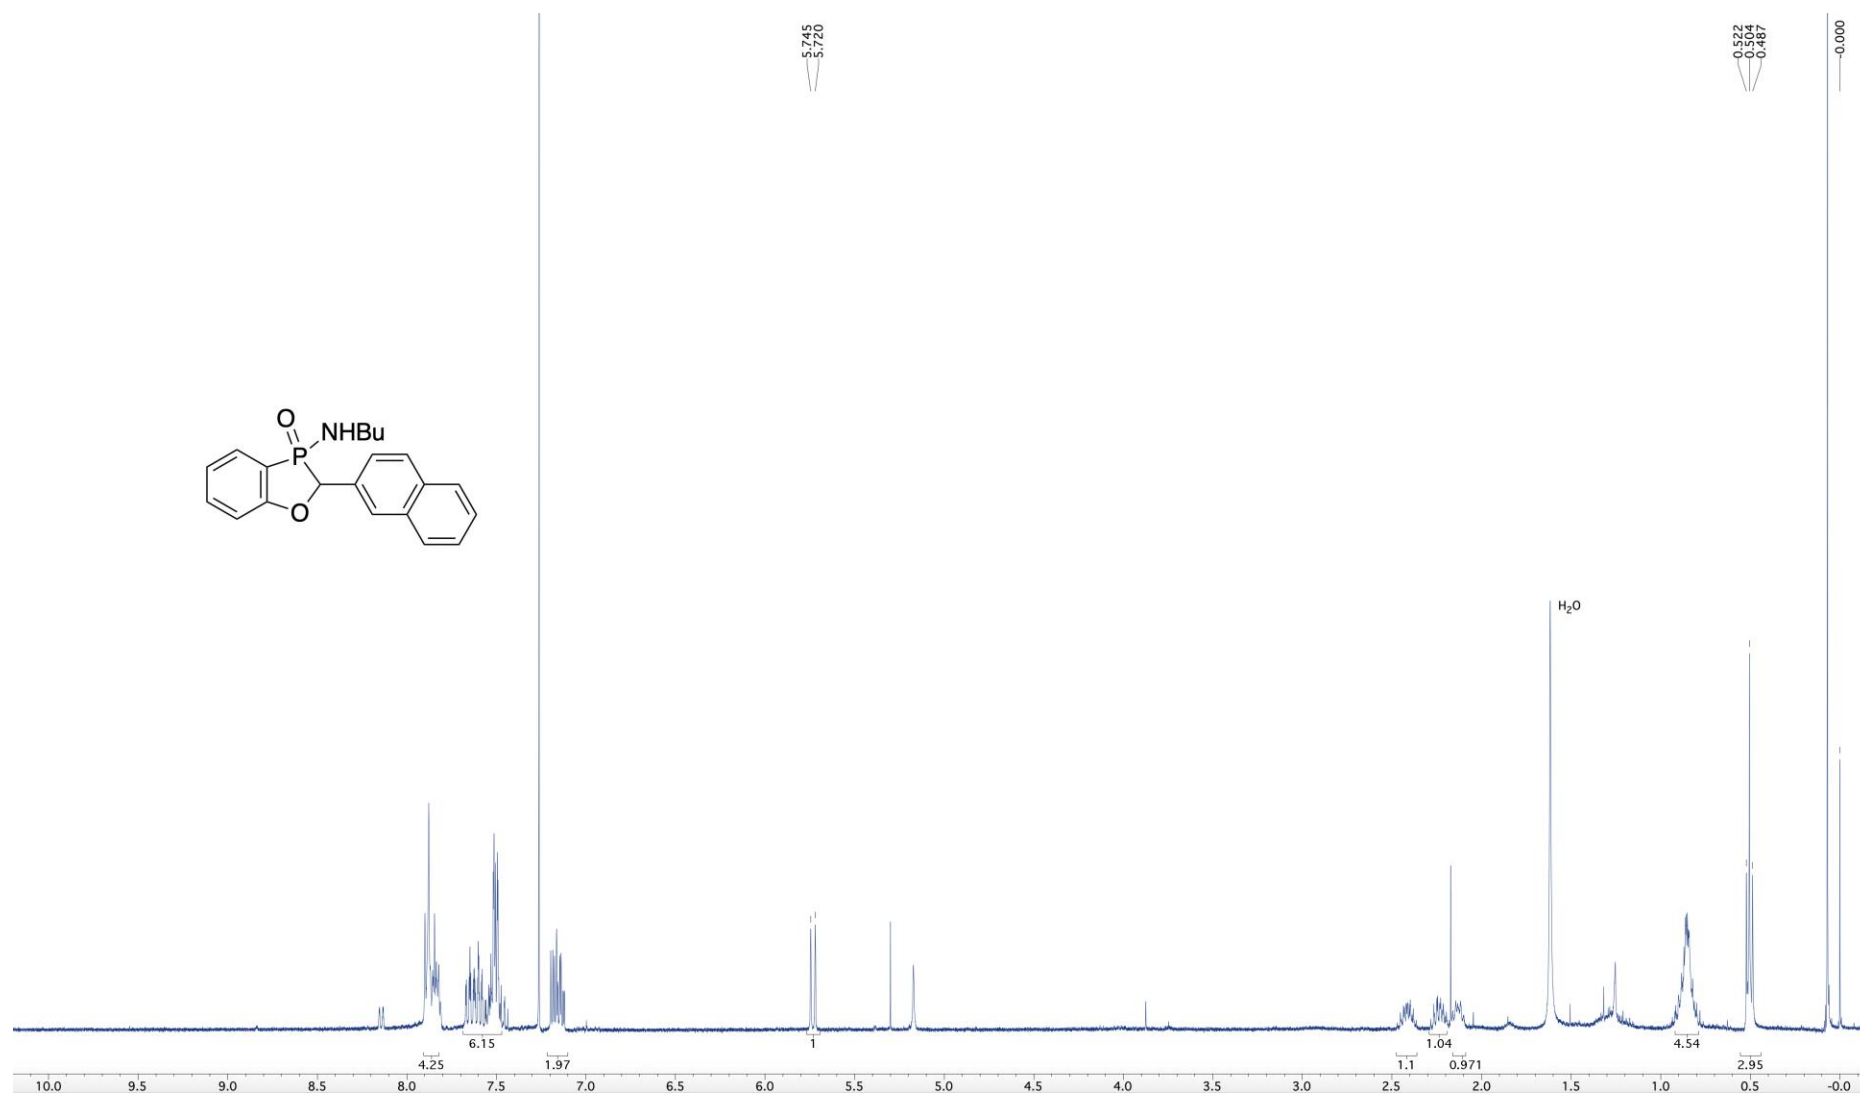

Figure S102. 162 MHz  $^{31}\text{P}$  NMR spectrum of **231**

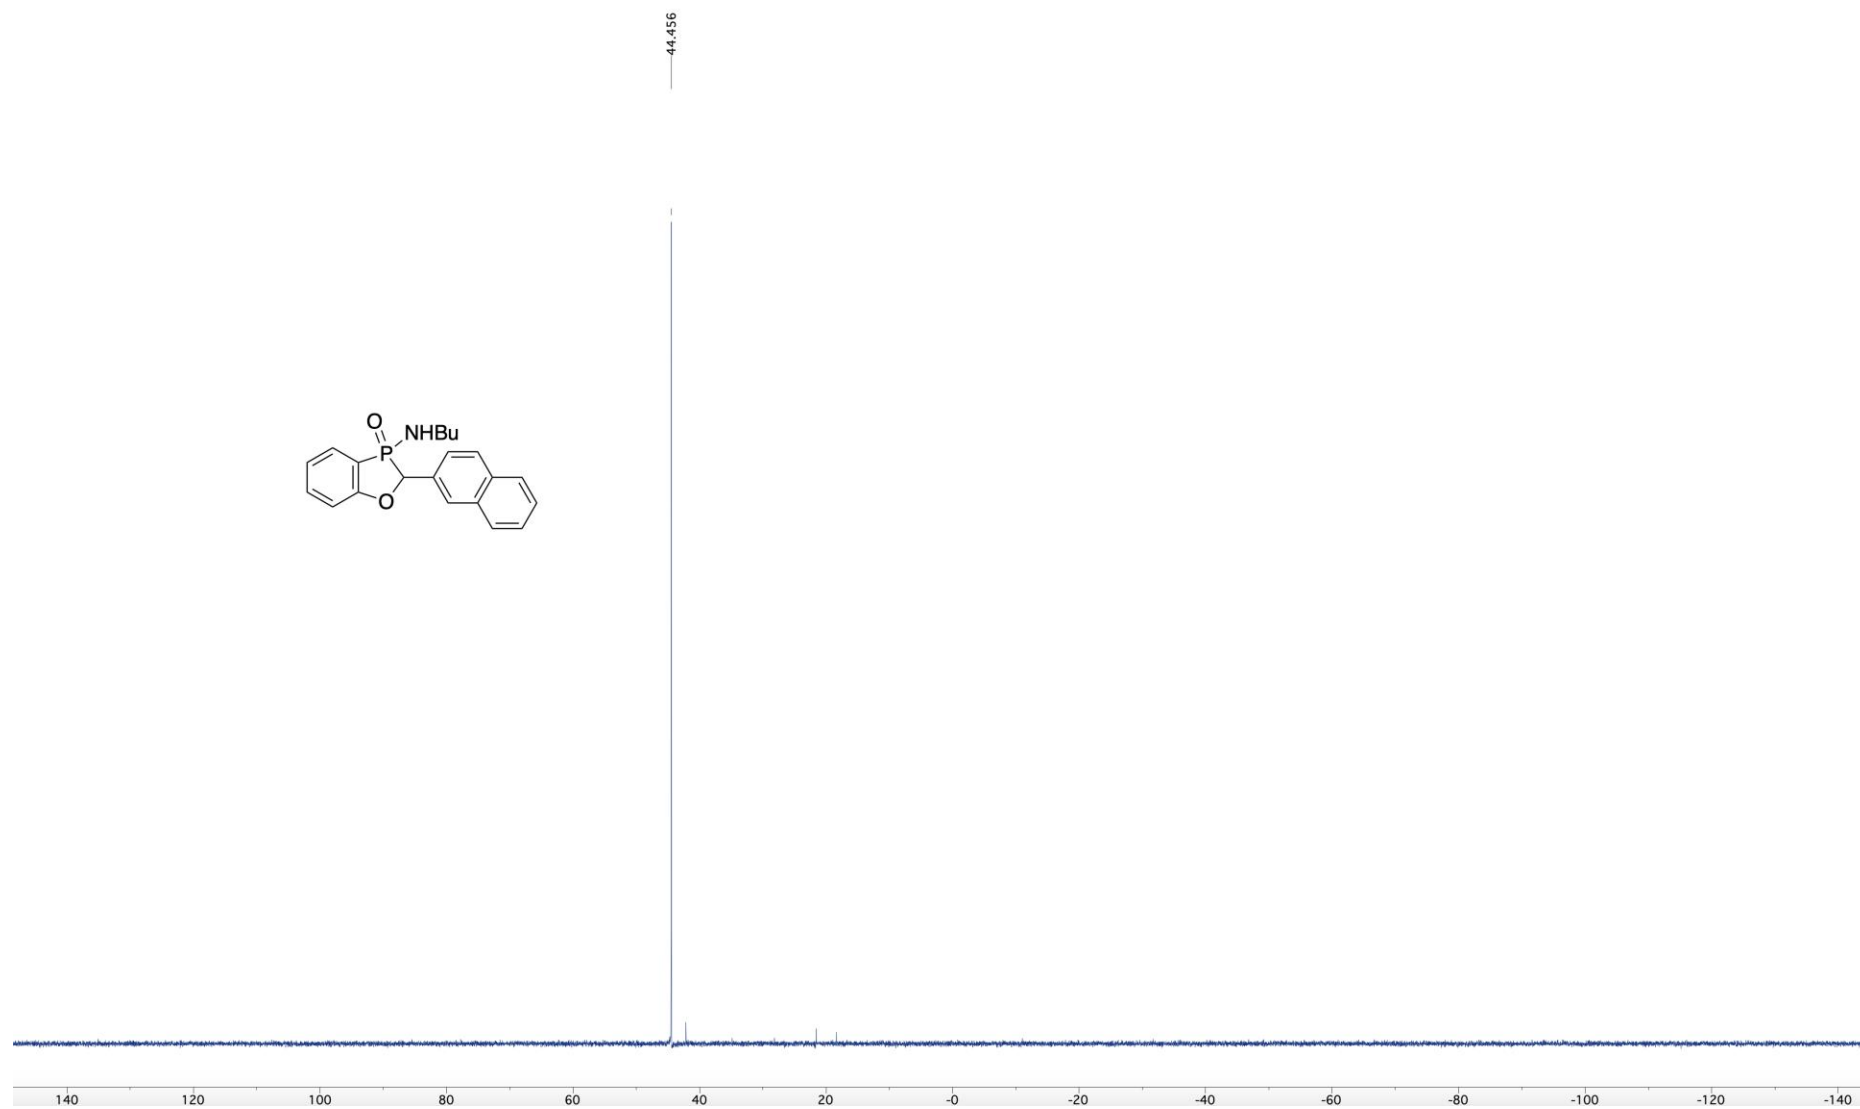

[illegible]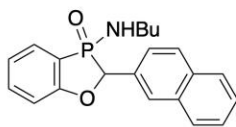

Supplement: s1 [file s1]
